# Supplementary material
Source: PubMed Central journal article supplement (PMC3232010)
Supplement: NIHMS337135-supplement-01.pdf [file NIHMS337135-supplement-01.pdf]

# Relevance of the C-5 Position to Schweinfurthin Induced Cytotoxicity

Joseph J. Topczewski,<sup>a</sup> Michael P. Callahan,<sup>a</sup> John G. Kodet,<sup>a</sup> Jerry D. Inbarasu,<sup>a</sup> Nolan R.

Mente,<sup>a</sup> John A. Beutler,<sup>b</sup> and David F. Wiemer<sup>a,\*</sup>

<sup>a</sup> *Department of Chemistry, University of Iowa, Iowa City, IA 52242-1294, USA*

<sup>b</sup> *Molecular Targets Laboratory, Center for Cancer Research, National Cancer Institute, Frederick, MD 21702, USA*

## Supplemental Table of Contents

|                                                      |     |
|------------------------------------------------------|-----|
| <sup>1</sup> H NMR for compound <b>8</b> (300 MHz)   | S4  |
| <sup>13</sup> C NMR for compound <b>8</b> (75 MHz)   | S5  |
| <sup>1</sup> H NMR for compound <b>9</b> (300 MHz)   | S6  |
| <sup>13</sup> C NMR for compound <b>9</b> (75 MHz)   | S7  |
| <sup>1</sup> H NMR for compound <b>10</b> (300 MHz)  | S8  |
| <sup>13</sup> C NMR for compound <b>10</b> (75 MHz)  | S9  |
| <sup>1</sup> H NMR for compound <b>11</b> (300 MHz)  | S10 |
| <sup>13</sup> C NMR for compound <b>11</b> (75 MHz)  | S11 |
| <sup>1</sup> H NMR for compound <b>13</b> (300 MHz)  | S12 |
| <sup>13</sup> C NMR for compound <b>13</b> (75 MHz)  | S13 |
| <sup>1</sup> H NMR for compound <b>14</b> (300 MHz)  | S14 |
| <sup>13</sup> C NMR for compound <b>14</b> (75 MHz)  | S15 |
| <sup>1</sup> H NMR for compound <b>18</b> (400 MHz)  | S16 |
| <sup>13</sup> C NMR for compound <b>18</b> (100 MHz) | S17 |
| <sup>1</sup> H NMR for compound <b>20</b> (300 MHz)  | S18 |
| <sup>13</sup> C NMR for compound <b>20</b> (75 MHz)  | S19 |
| <sup>1</sup> H NMR for compound <b>21</b> (400 MHz)  | S20 |
| <sup>13</sup> C NMR for compound <b>21</b> (100 MHz) | S21 |
| <sup>1</sup> H NMR for compound <b>22</b> (300 MHz)  | S22 |
| <sup>13</sup> C NMR for compound <b>22</b> (75 MHz)  | S23 |
| <sup>1</sup> H NMR for compound <b>23</b> (400 MHz)  | S24 |
| <sup>13</sup> C NMR for compound <b>23</b> (100 MHz) | S25 |
| <sup>1</sup> H NMR for compound <b>24</b> (400 MHz)  | S26 |
| <sup>13</sup> C NMR for compound <b>24</b> (100 MHz) | S27 |

|                                                      |     |
|------------------------------------------------------|-----|
| <sup>1</sup> H NMR for compound <b>25</b> (400 MHz)  | S28 |
| <sup>13</sup> C NMR for compound <b>25</b> (100 MHz) | S29 |
| <sup>1</sup> H NMR for compound <b>27</b> (300 MHz)  | S30 |
| <sup>13</sup> C NMR for compound <b>27</b> (75 MHz)  | S31 |
| <sup>1</sup> H NMR for compound <b>28</b> (300 MHz)  | S32 |
| <sup>13</sup> C NMR for compound <b>28</b> (75 MHz)  | S33 |
| <sup>1</sup> H NMR for compound <b>29</b> (300 MHz)  | S34 |
| <sup>13</sup> C NMR for compound <b>29</b> (75 MHz)  | S35 |
| <sup>1</sup> H NMR for compound <b>30</b> (300 MHz)  | S36 |
| <sup>13</sup> C NMR for compound <b>30</b> (75 MHz)  | S37 |
| <sup>1</sup> H NMR for compound <b>31</b> (300 MHz)  | S38 |
| <sup>13</sup> C NMR for compound <b>31</b> (75 MHz)  | S39 |
| <sup>1</sup> H NMR for compound <b>33</b> (400 MHz)  | S40 |
| <sup>13</sup> C NMR for compound <b>33</b> (100 MHz) | S41 |
| <sup>1</sup> H NMR for compound <b>34</b> (400 MHz)  | S42 |
| <sup>13</sup> C NMR for compound <b>34</b> (100 MHz) | S43 |
| <sup>1</sup> H NMR for compound <b>36</b> (400 MHz)  | S44 |
| <sup>13</sup> C NMR for compound <b>36</b> (100 MHz) | S45 |
| <sup>1</sup> H NMR for compound <b>38</b> (300 MHz)  | S46 |
| <sup>13</sup> C NMR for compound <b>38</b> (75 MHz)  | S47 |
| <sup>1</sup> H NMR for compound <b>39</b> (300 MHz)  | S48 |
| <sup>13</sup> C NMR for compound <b>39</b> (75 MHz)  | S49 |
| <sup>1</sup> H NMR for compound <b>43</b> (400 MHz)  | S50 |
| <sup>13</sup> C NMR for compound <b>43</b> (100 MHz) | S51 |
| <sup>1</sup> H NMR for compound <b>51</b> (400 MHz)  | S52 |
| <sup>13</sup> C NMR for compound <b>51</b> (100 MHz) | S53 |
| <sup>1</sup> H NMR for compound <b>44</b> (300 MHz)  | S54 |
| <sup>13</sup> C NMR for compound <b>44</b> (75 MHz)  | S55 |
| <sup>1</sup> H NMR for compound <b>52</b> (400 MHz)  | S56 |
| <sup>13</sup> C NMR for compound <b>52</b> (100 MHz) | S57 |
| <sup>1</sup> H NMR for compound <b>45</b> (400 MHz)  | S58 |
| <sup>13</sup> C NMR for compound <b>45</b> (100 MHz) | S59 |
| <sup>1</sup> H NMR for compound <b>53</b> (400 MHz)  | S60 |
| <sup>13</sup> C NMR for compound <b>53</b> (100 MHz) | S61 |
| <sup>1</sup> H NMR for compound <b>46</b> (300 MHz)  | S62 |
| <sup>13</sup> C NMR for compound <b>46</b> (75 MHz)  | S63 |
| <sup>1</sup> H NMR for compound <b>54</b> (400 MHz)  | S64 |
| <sup>13</sup> C NMR for compound <b>54</b> (100 MHz) | S65 |
| <sup>1</sup> H NMR for compound <b>47</b> (300 MHz)  | S66 |
| <sup>13</sup> C NMR for compound <b>47</b> (75 MHz)  | S67 |
| <sup>1</sup> H NMR for compound <b>55</b> (400 MHz)  | S68 |
| <sup>13</sup> C NMR for compound <b>55</b> (100 MHz) | S69 |
| <sup>1</sup> H NMR for compound <b>48</b> (300 MHz)  | S70 |
| <sup>13</sup> C NMR for compound <b>48</b> (100 MHz) | S71 |
| <sup>1</sup> H NMR for compound <b>56</b> (300 MHz)  | S72 |
| <sup>13</sup> C NMR for compound <b>56</b> (75 MHz)  | S73 |

|                                                                        |      |
|------------------------------------------------------------------------|------|
| <sup>1</sup> H NMR for compound <b>49</b> (300 MHz)                    | S74  |
| <sup>13</sup> C NMR for compound <b>49</b> (75 MHz)                    | S75  |
| <sup>1</sup> H NMR for compound <b>57</b> (300 MHz)                    | S76  |
| <sup>13</sup> C NMR for compound <b>57</b> (75 MHz)                    | S77  |
| <sup>1</sup> H NMR for compound <b>50</b> (400 MHz)                    | S78  |
| <sup>13</sup> C NMR for compound <b>50</b> (100 MHz)                   | S79  |
| <sup>1</sup> H NMR for compound <b>58</b> (400 MHz)                    | S80  |
| <sup>13</sup> C NMR for compound <b>58</b> (100 MHz)                   | S81  |
| <sup>1</sup> H NMR for compound <b>59</b> (400 MHz)                    | S82  |
| <sup>1</sup> H NMR for compound <b>60</b> (400 MHz)                    | S83  |
| <sup>13</sup> C NMR for compound <b>60</b> (100 MHz)                   | S84  |
| <sup>1</sup> H NMR for compound <b>61</b> (400 MHz)                    | S85  |
| <sup>13</sup> C NMR for compound <b>61</b> (100 MHz)                   | S86  |
| <sup>1</sup> H NMR for compound <b>62</b> (400 MHz)                    | S87  |
| <sup>13</sup> C NMR for compound <b>62</b> (100 MHz)                   | S88  |
| 60 Cell-line assay data for compound <b>52</b> (one dose)              | S89  |
| 60 Cell-line assay data for compound <b>55</b> (one dose)              | S91  |
| 60 Cell-line assay data for compound <b>51</b> (five dose)             | S93  |
| 60 Cell-line assay data for compound <b>53</b> (five dose)             | S95  |
| 60 Cell-line assay data for compound <b>54</b> (five dose)             | S97  |
| 60 Cell-line assay data for compound <b>56</b> (five dose)             | S99  |
| 60 Cell-line assay data for compound <b>56</b> (five dose – replicate) | S101 |
| 60 Cell-line assay data for compound <b>57</b> (five dose)             | S103 |
| 60 Cell-line assay data for compound <b>58</b> (five dose)             | S105 |
| 60 Cell-line assay data for compound <b>60</b> (five dose)             | S107 |

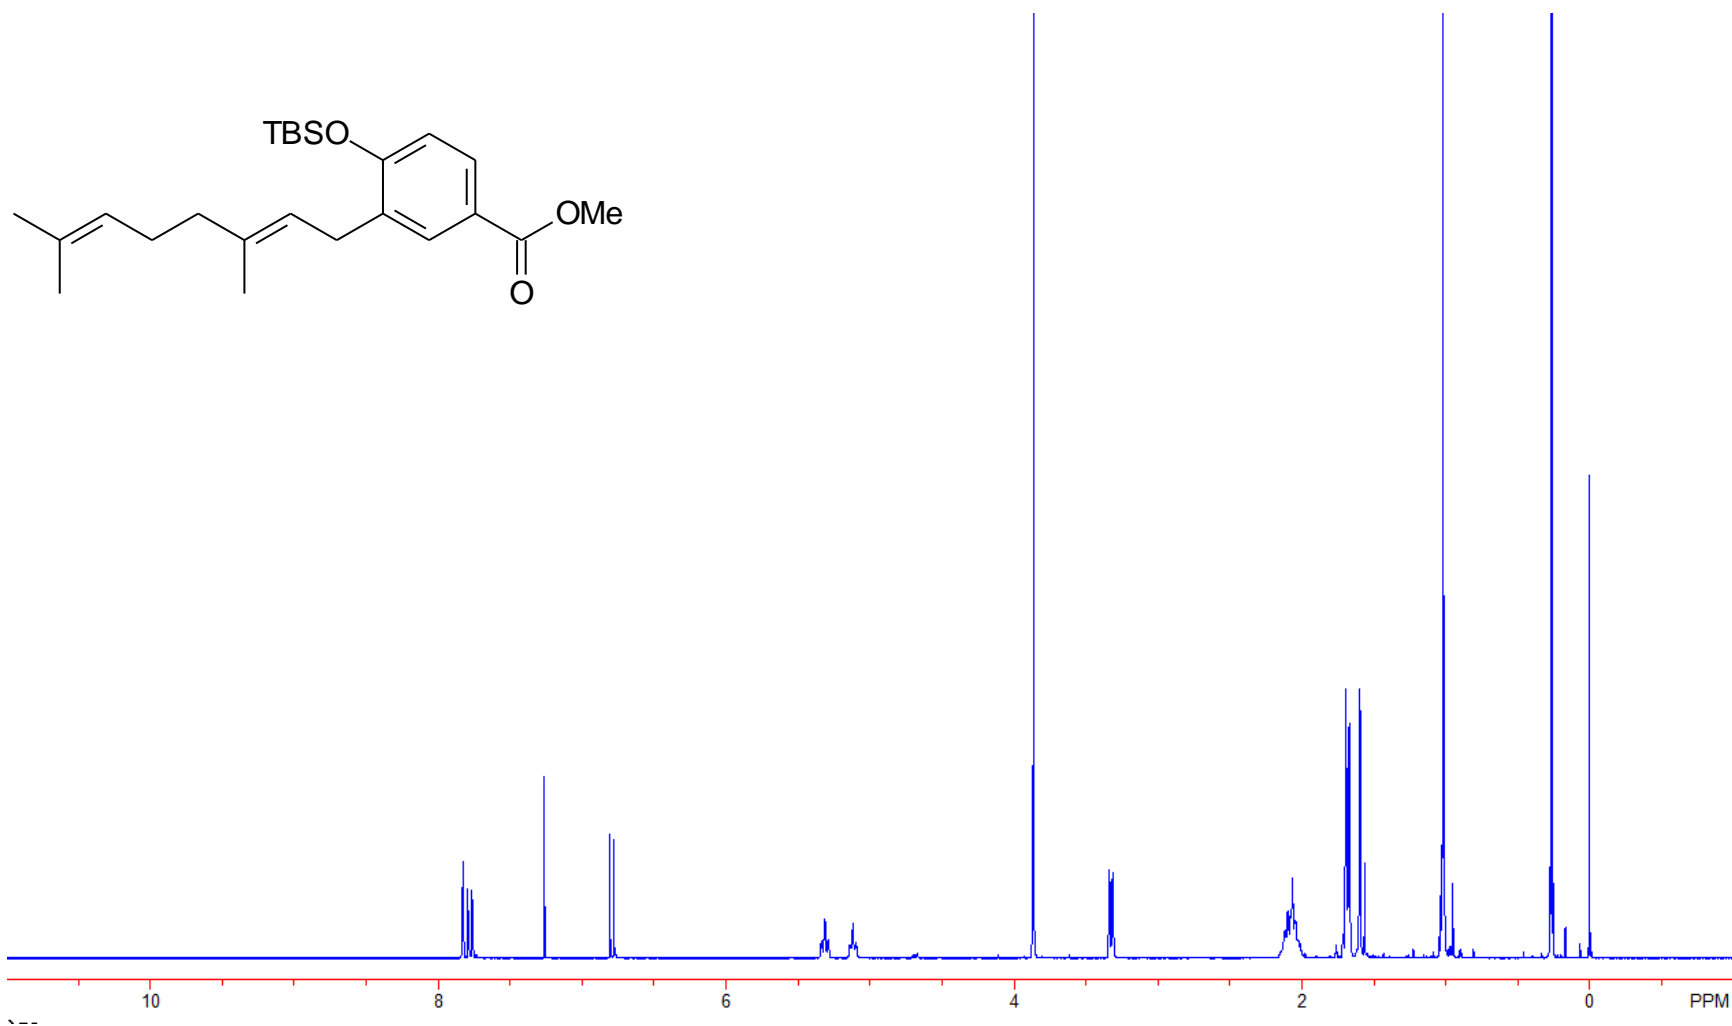

300 MHz  $^1\text{H}$  NMR Spectrum of Compound 8

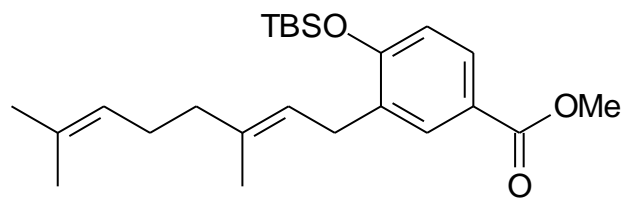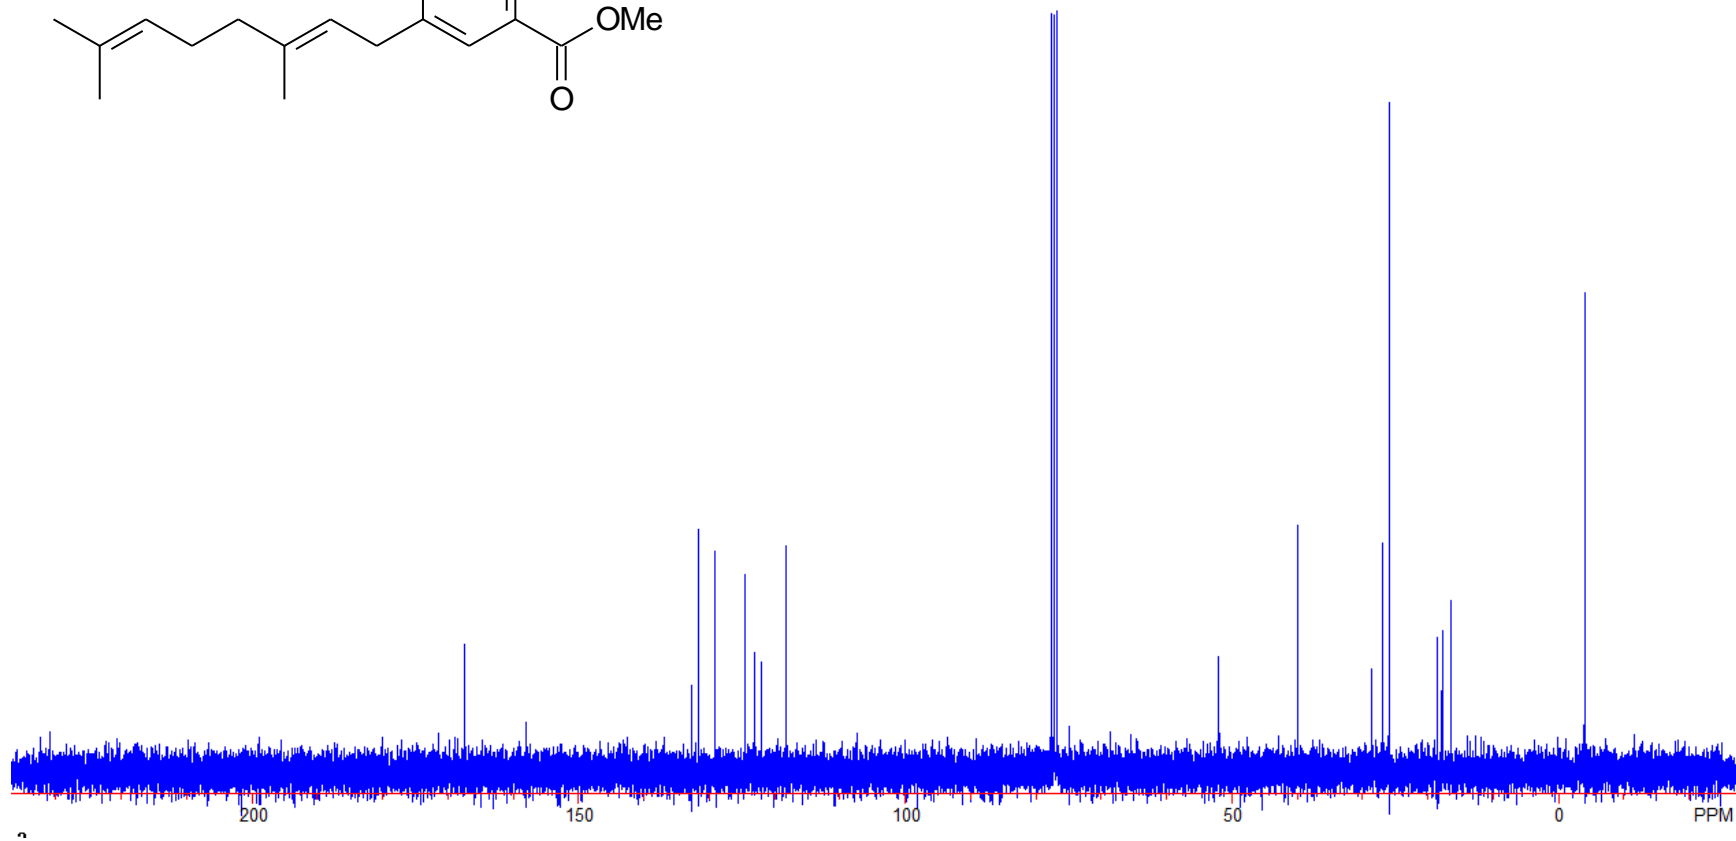

75 MHz <sup>13</sup>C NMR Spectrum of Compound 8

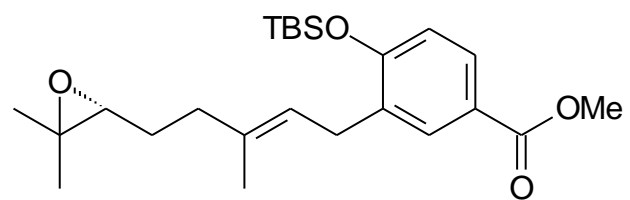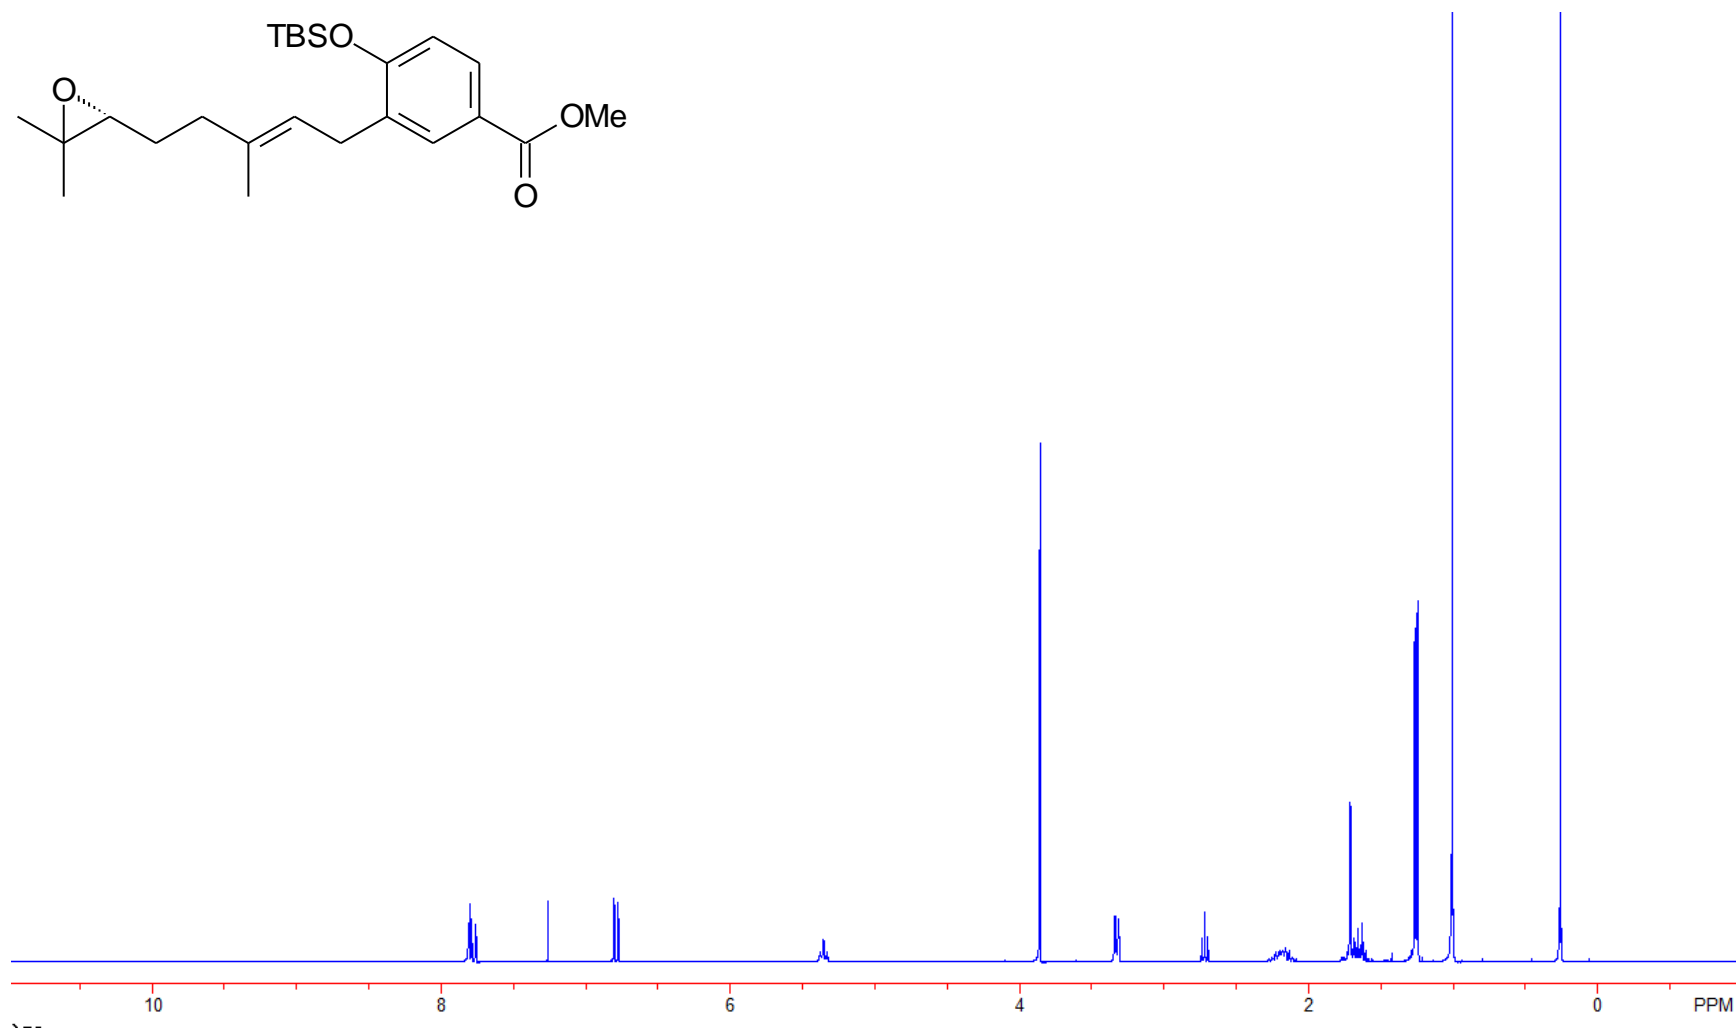

300 MHz  $^1\text{H}$  NMR Spectrum of Compound 9

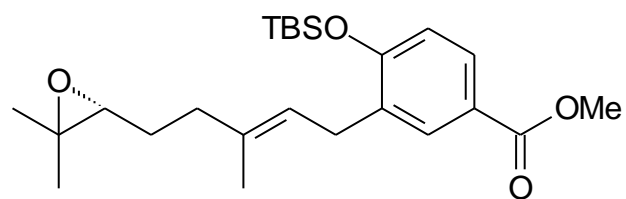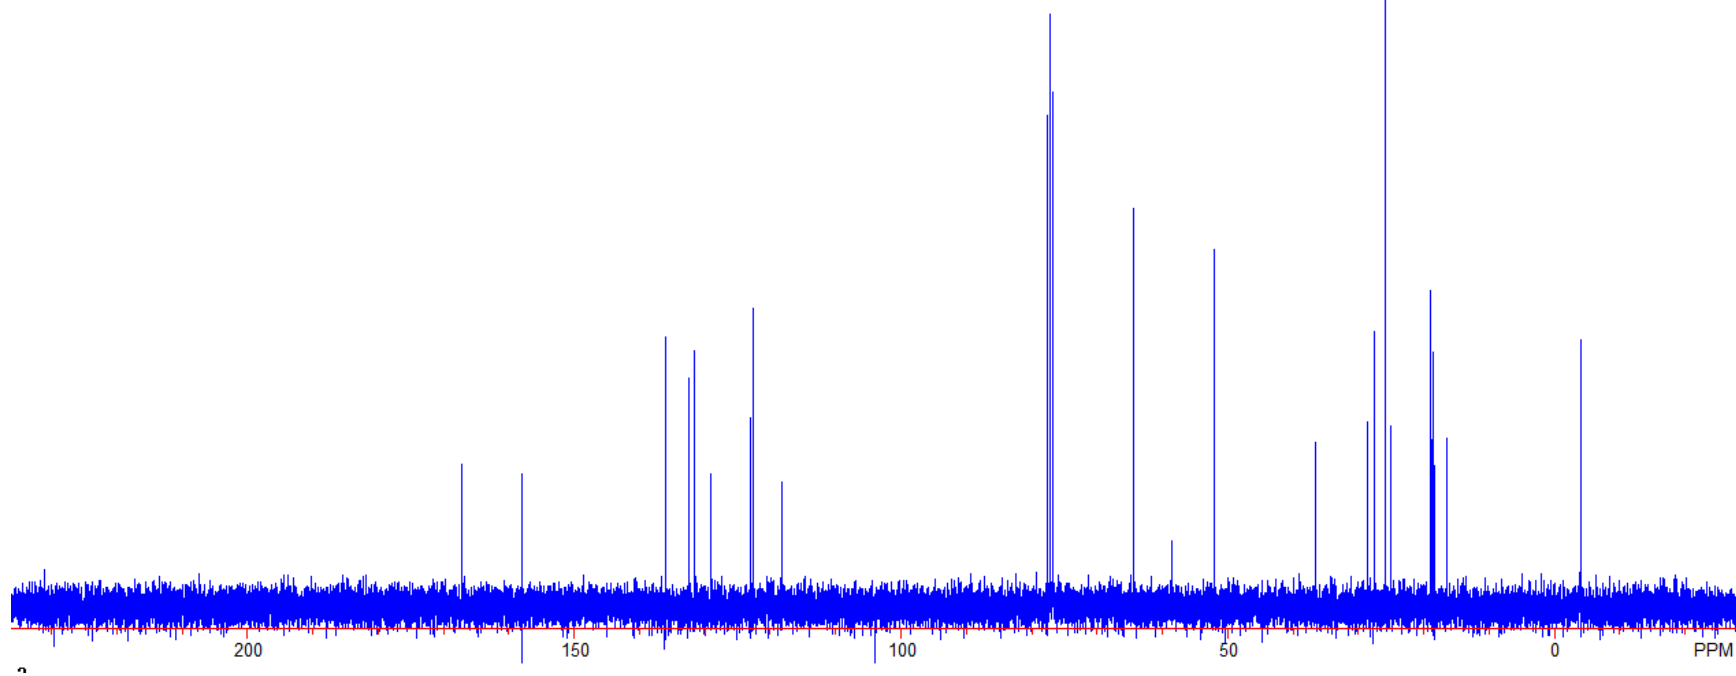

75 MHz  $^{13}\text{C}$  NMR Spectrum of Compound 9

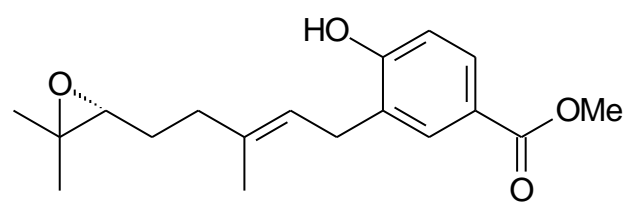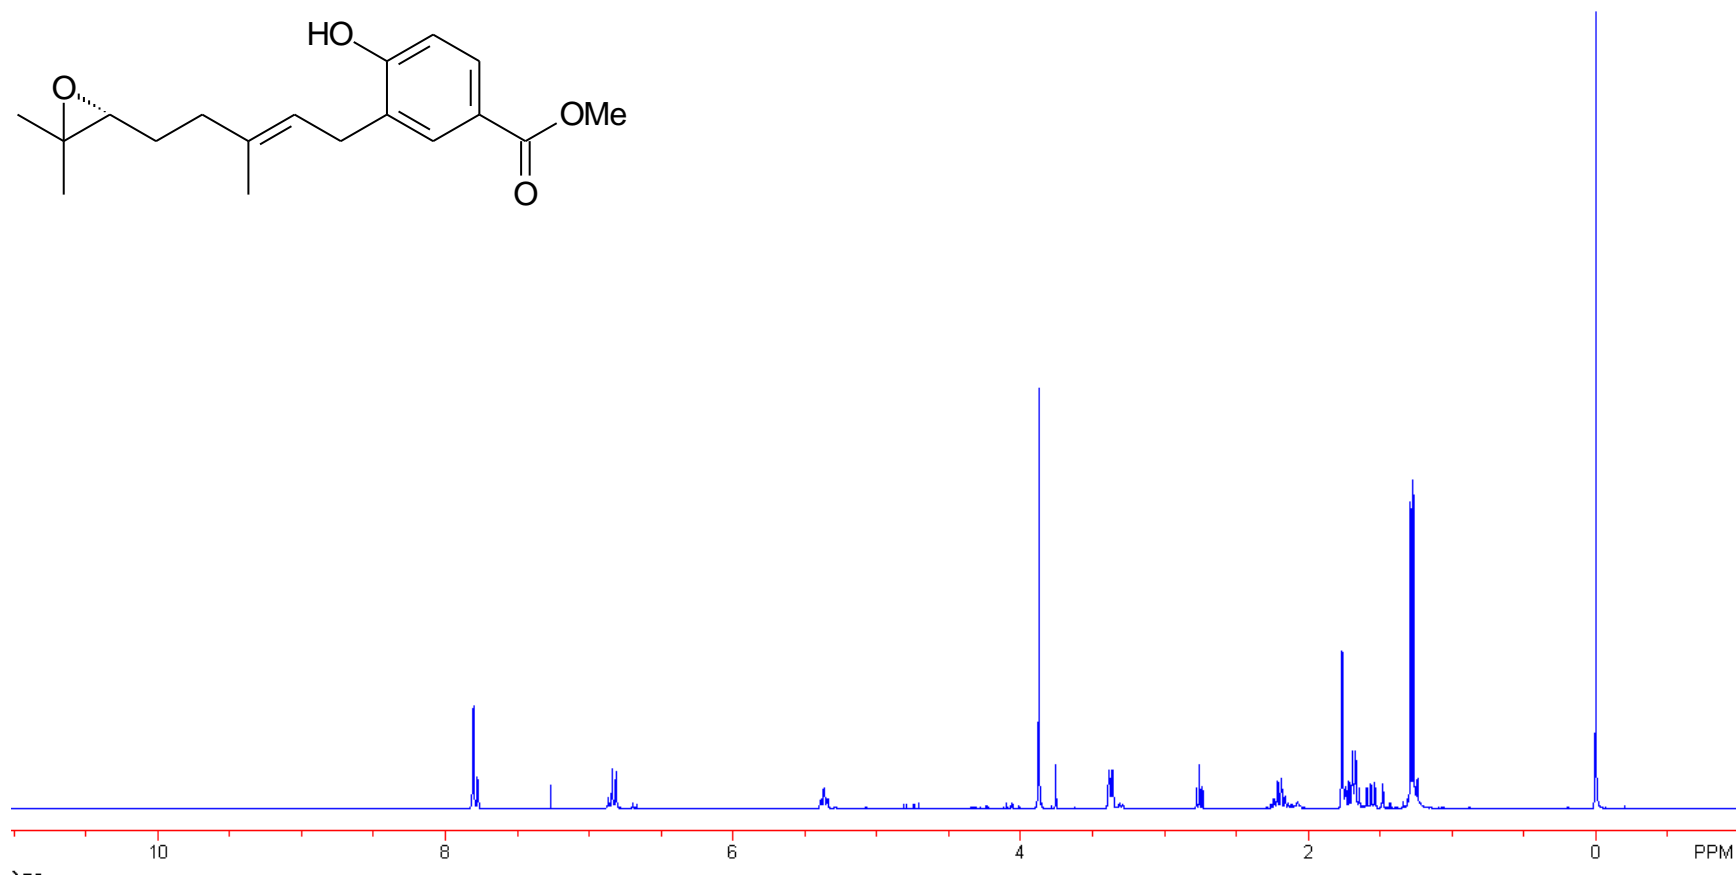

300 MHz <sup>1</sup>H NMR Spectrum of Compound 10



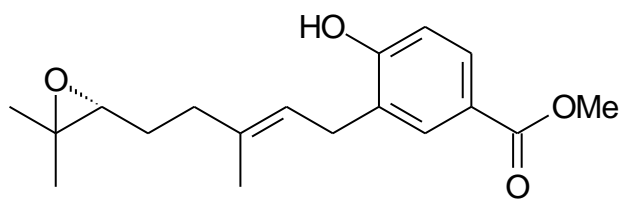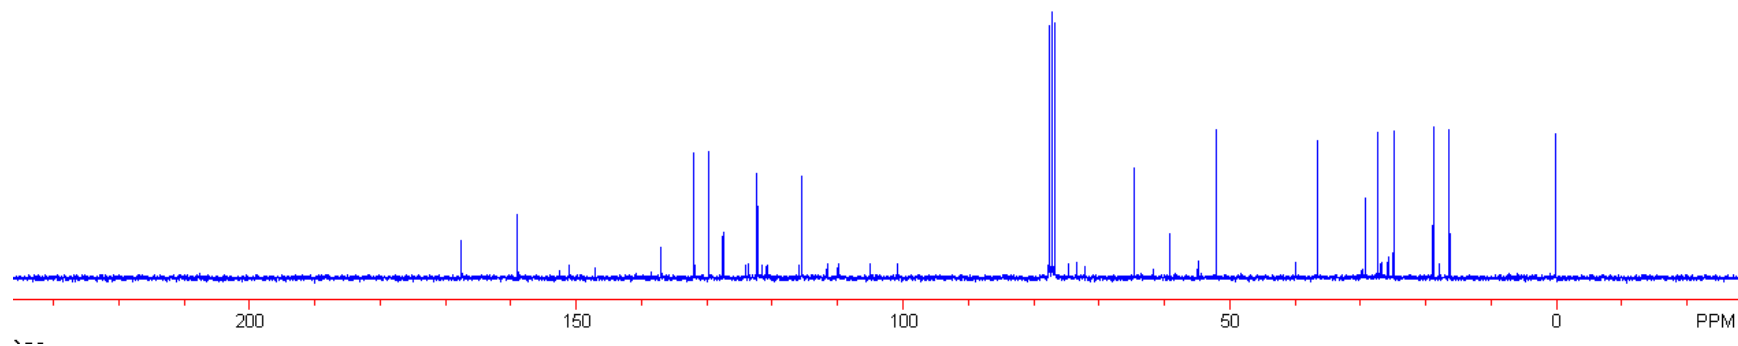

75 MHz  $^{13}\text{C}$  NMR Spectrum of Compound 10

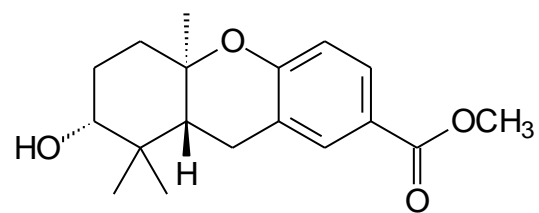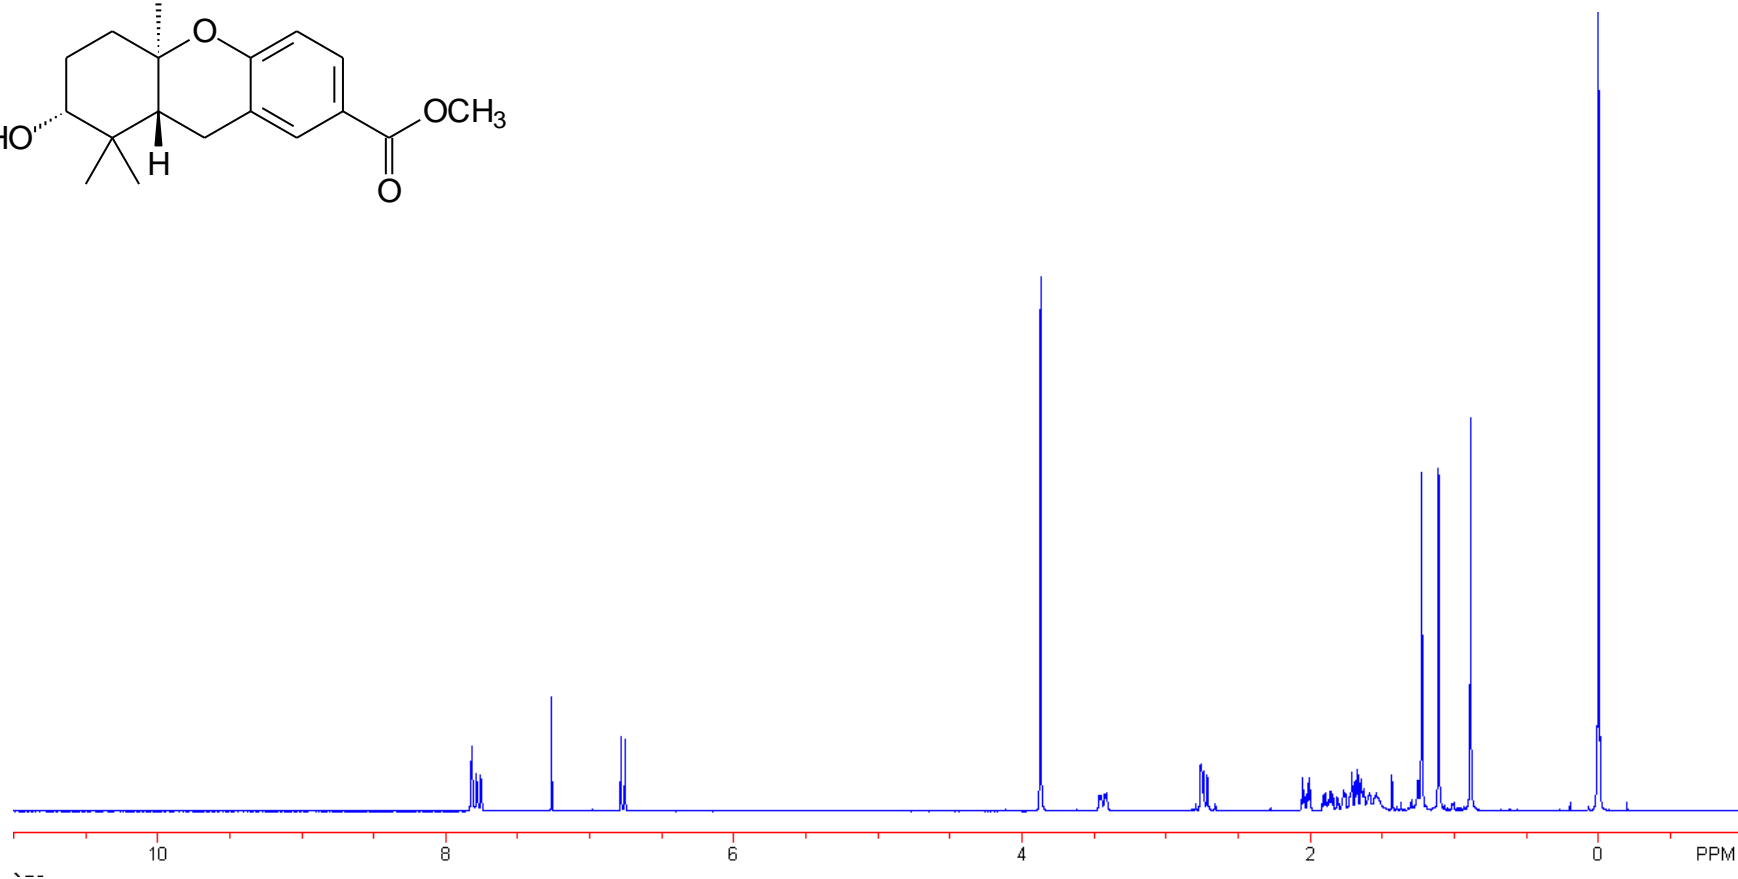

300 MHz <sup>1</sup>H NMR Spectrum of Compound **11**

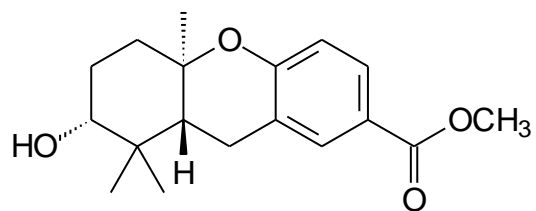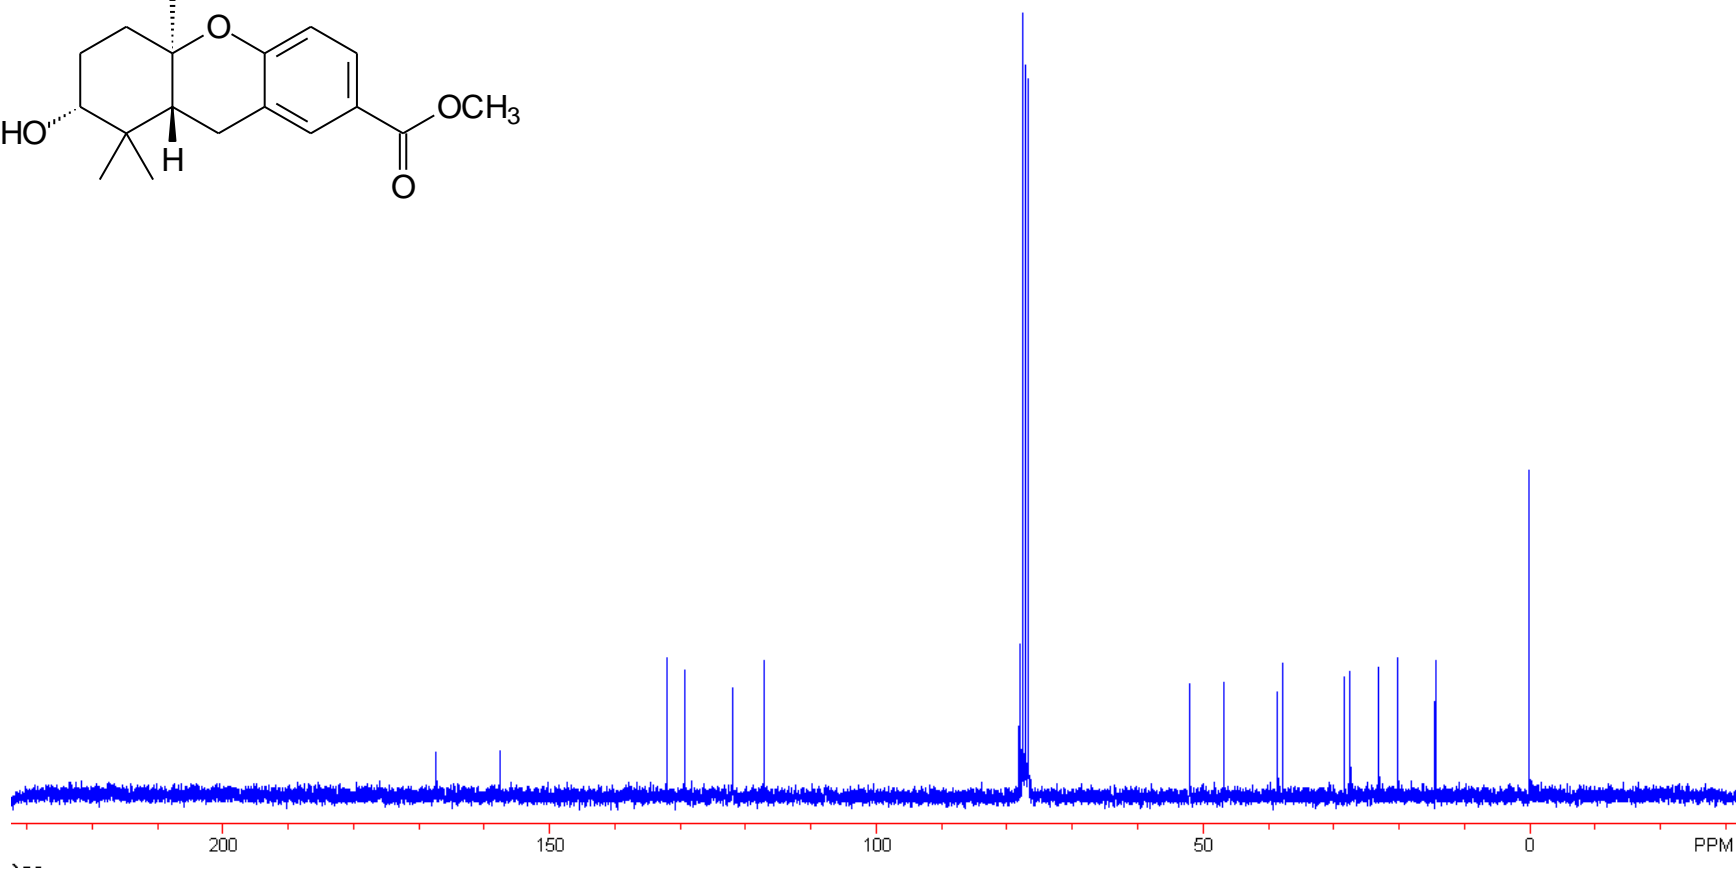

75 MHz <sup>13</sup>C NMR Spectrum of Compound 11

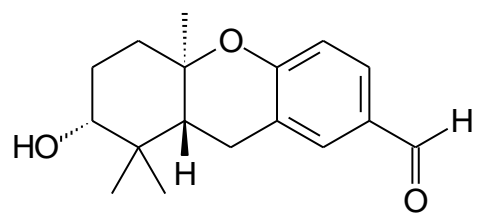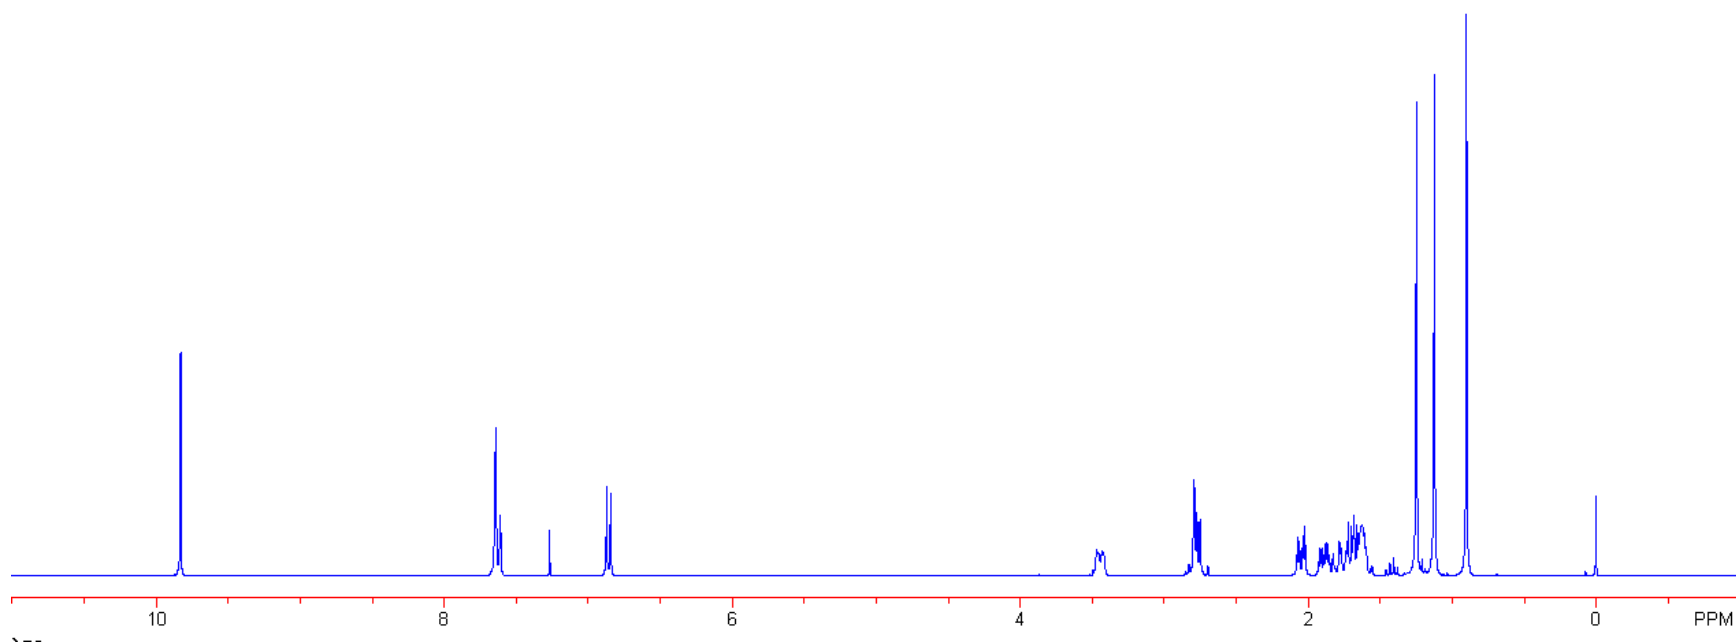

300 MHz <sup>1</sup>H NMR Spectrum of Compound 13

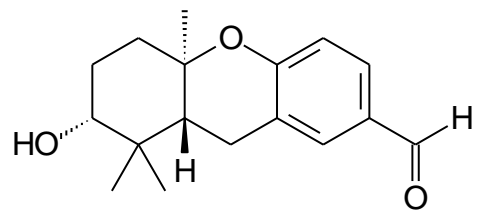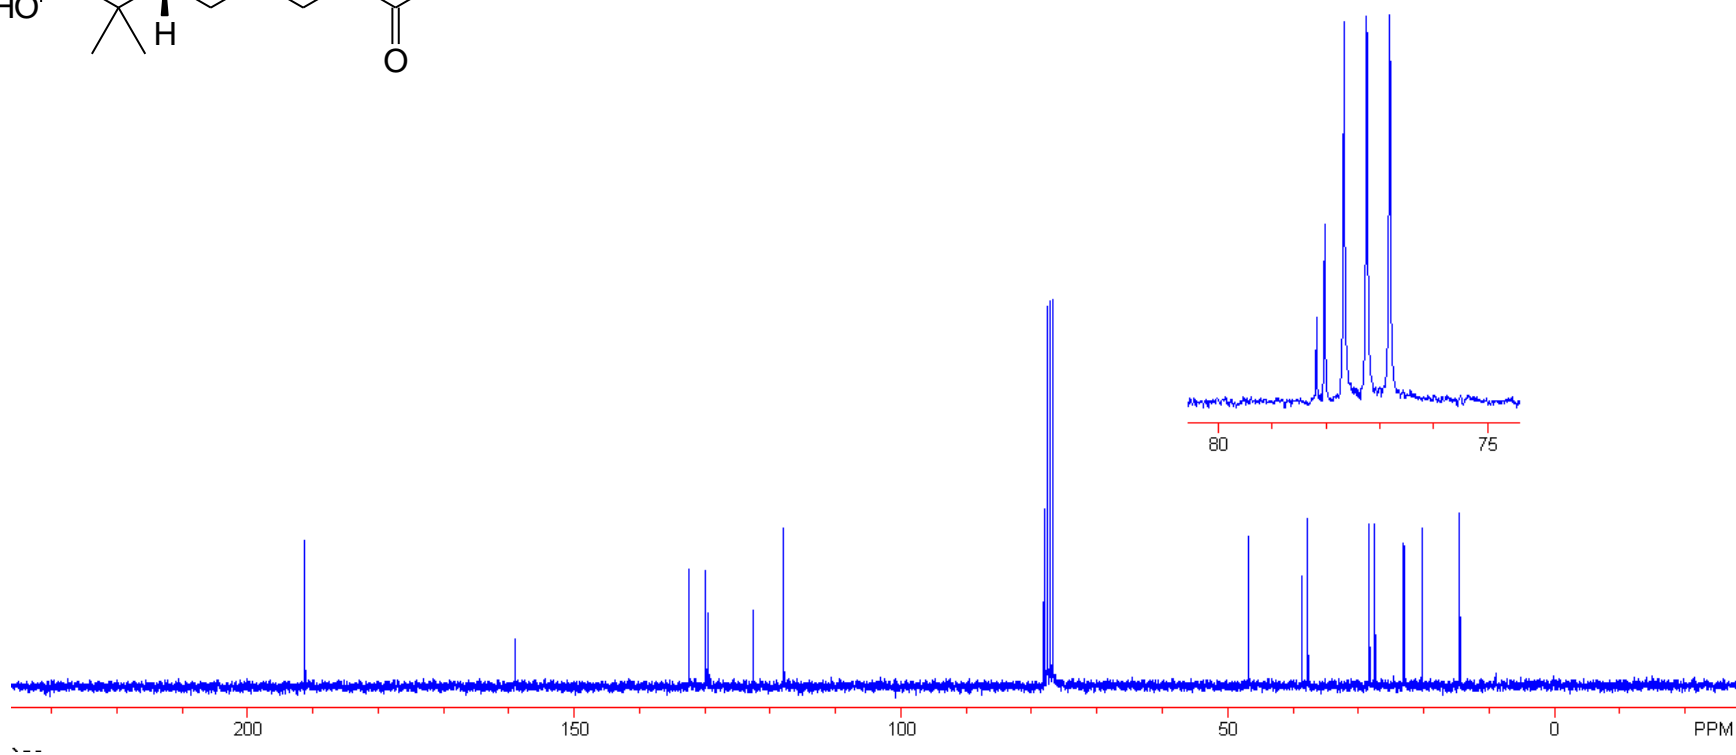

75 MHz <sup>13</sup>C NMR Spectrum of Compound 13

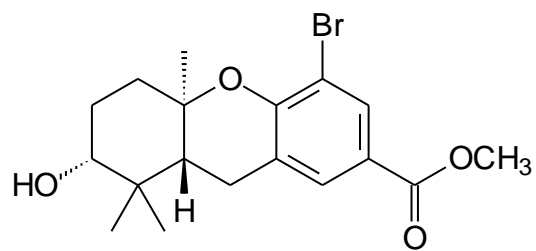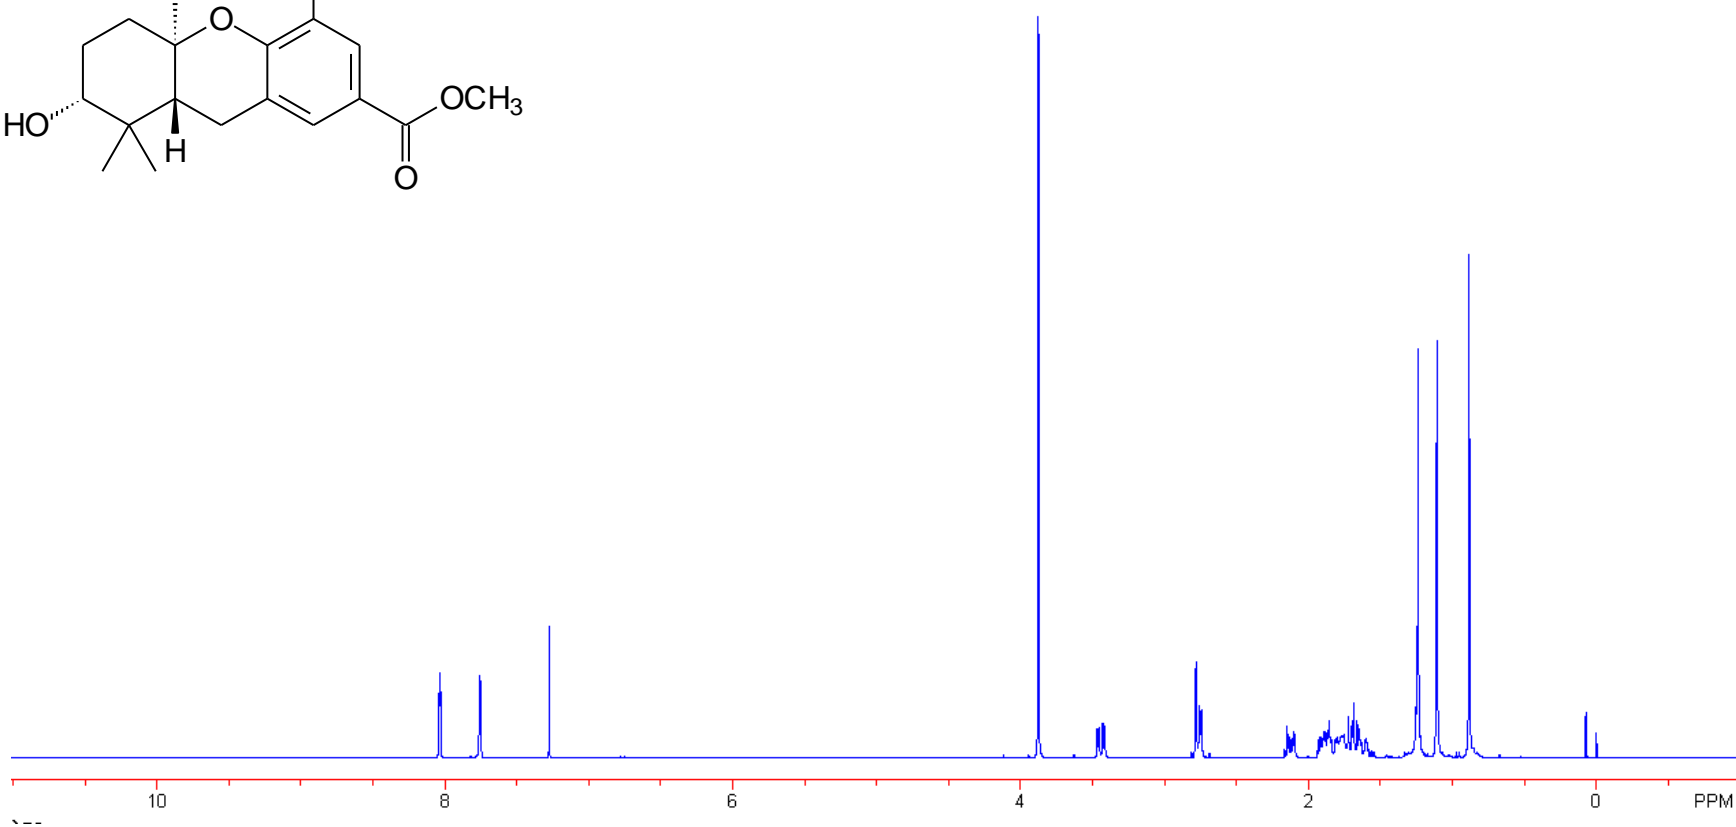

300 MHz <sup>1</sup>H NMR Spectrum of Compound **14**

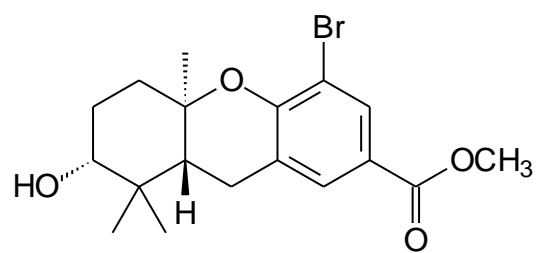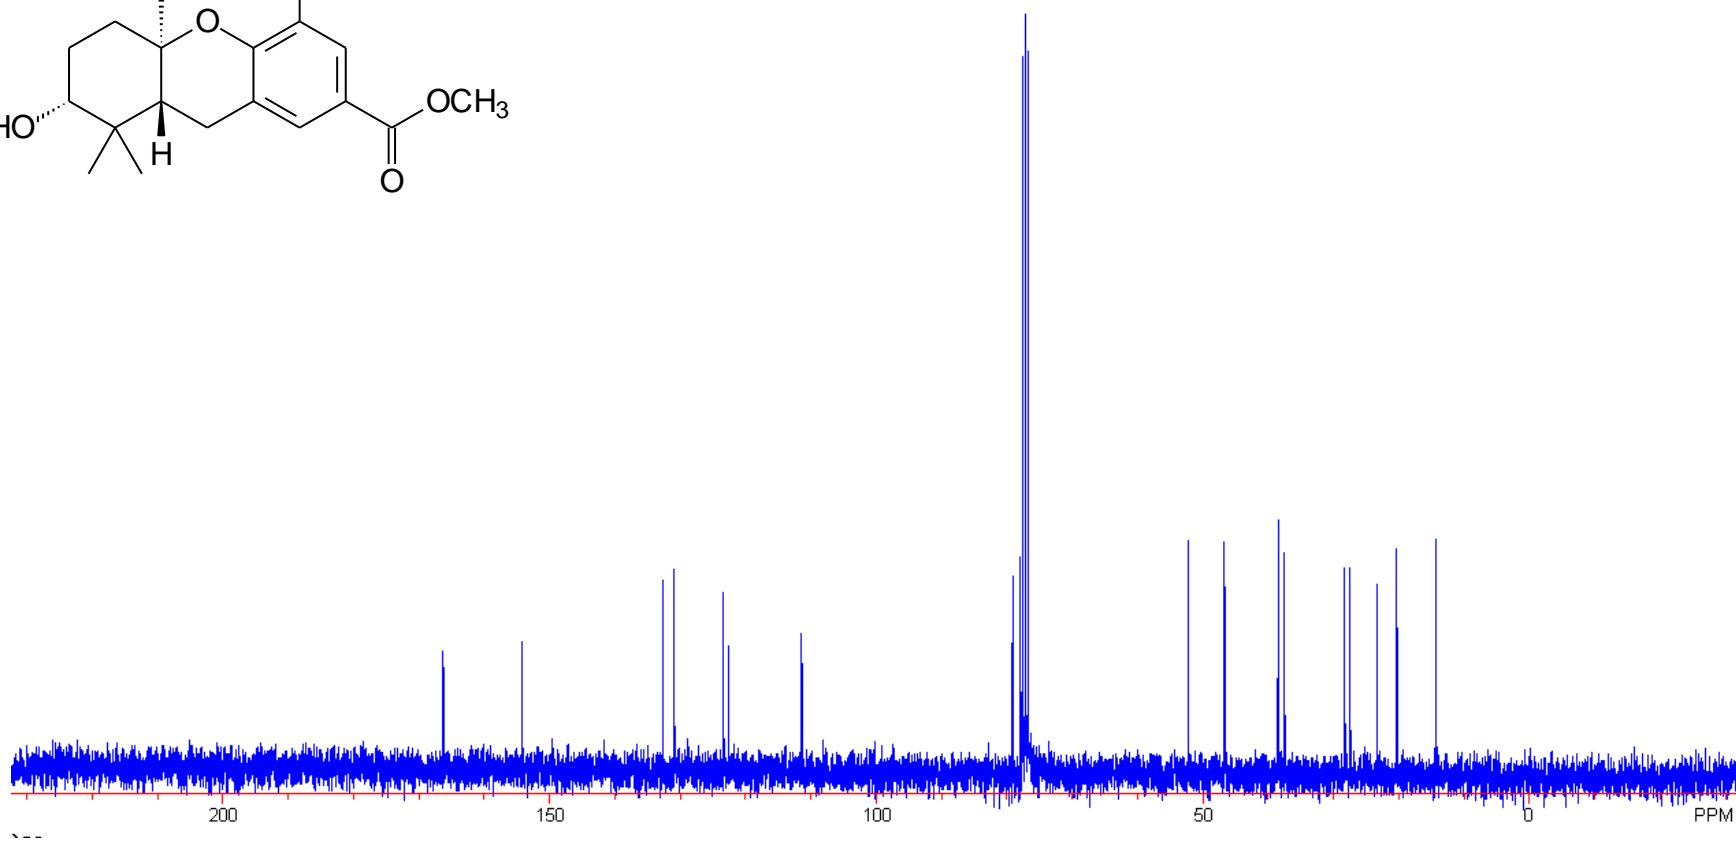

75 MHz <sup>13</sup>C NMR Spectrum of Compound 14

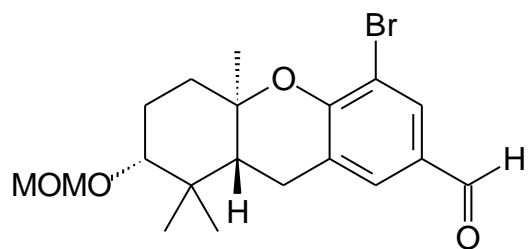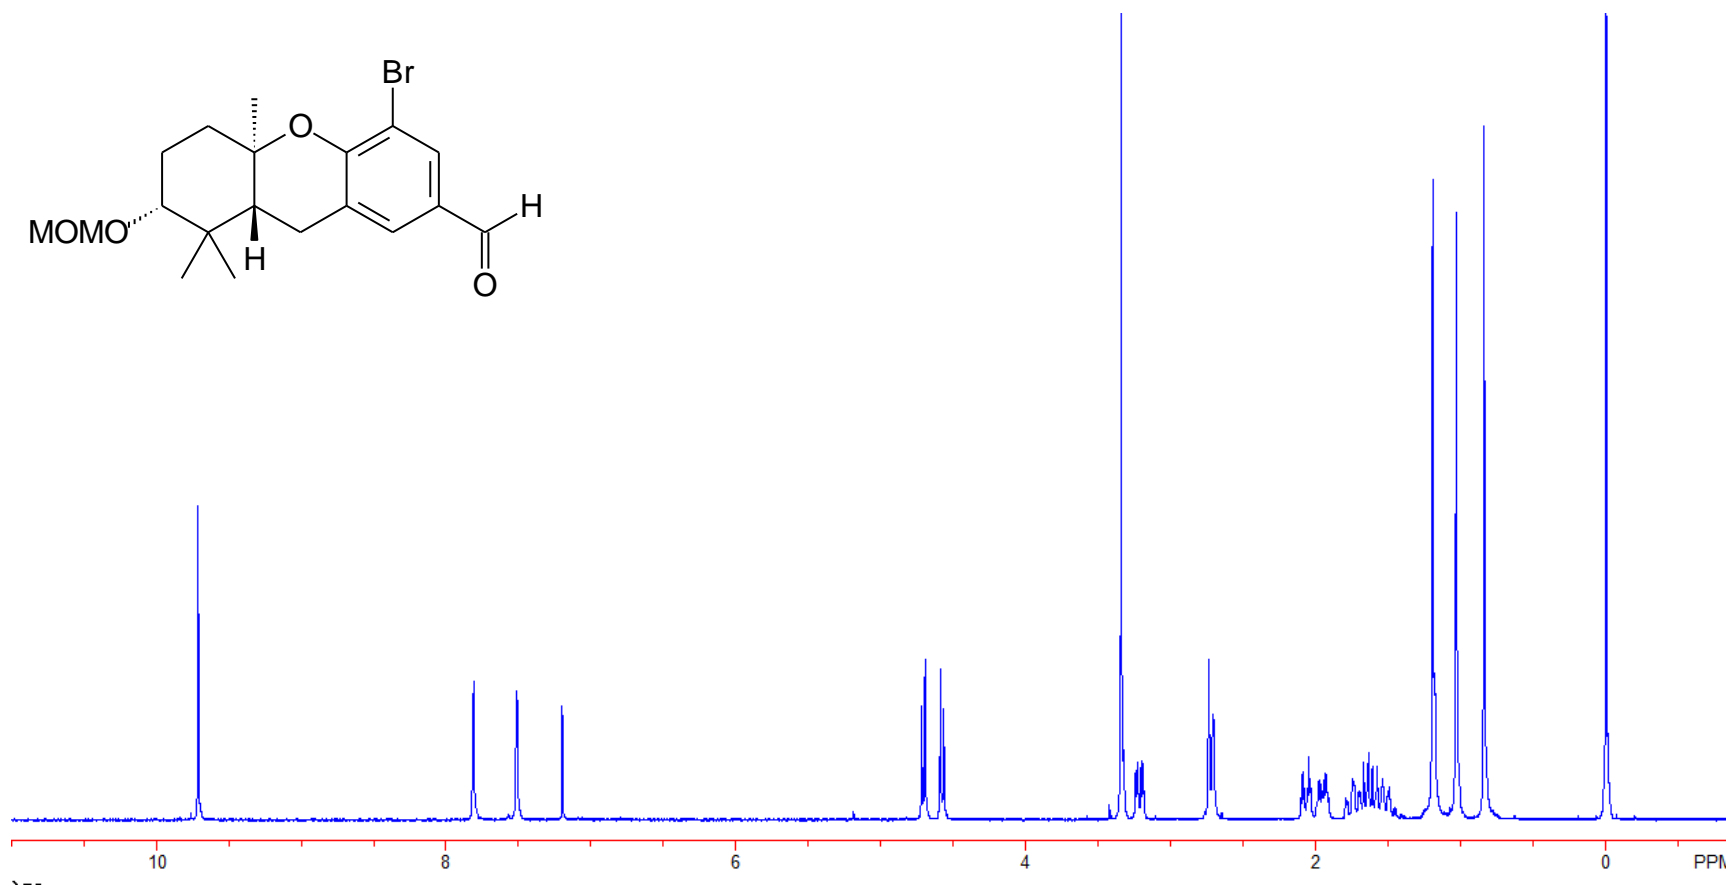

400 MHz  $^1\text{H}$  NMR Spectrum of Compound 18



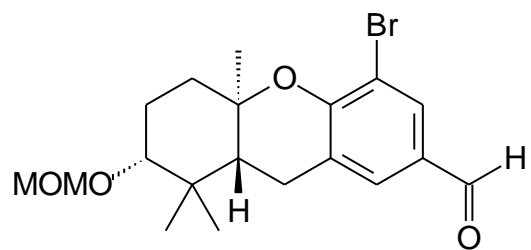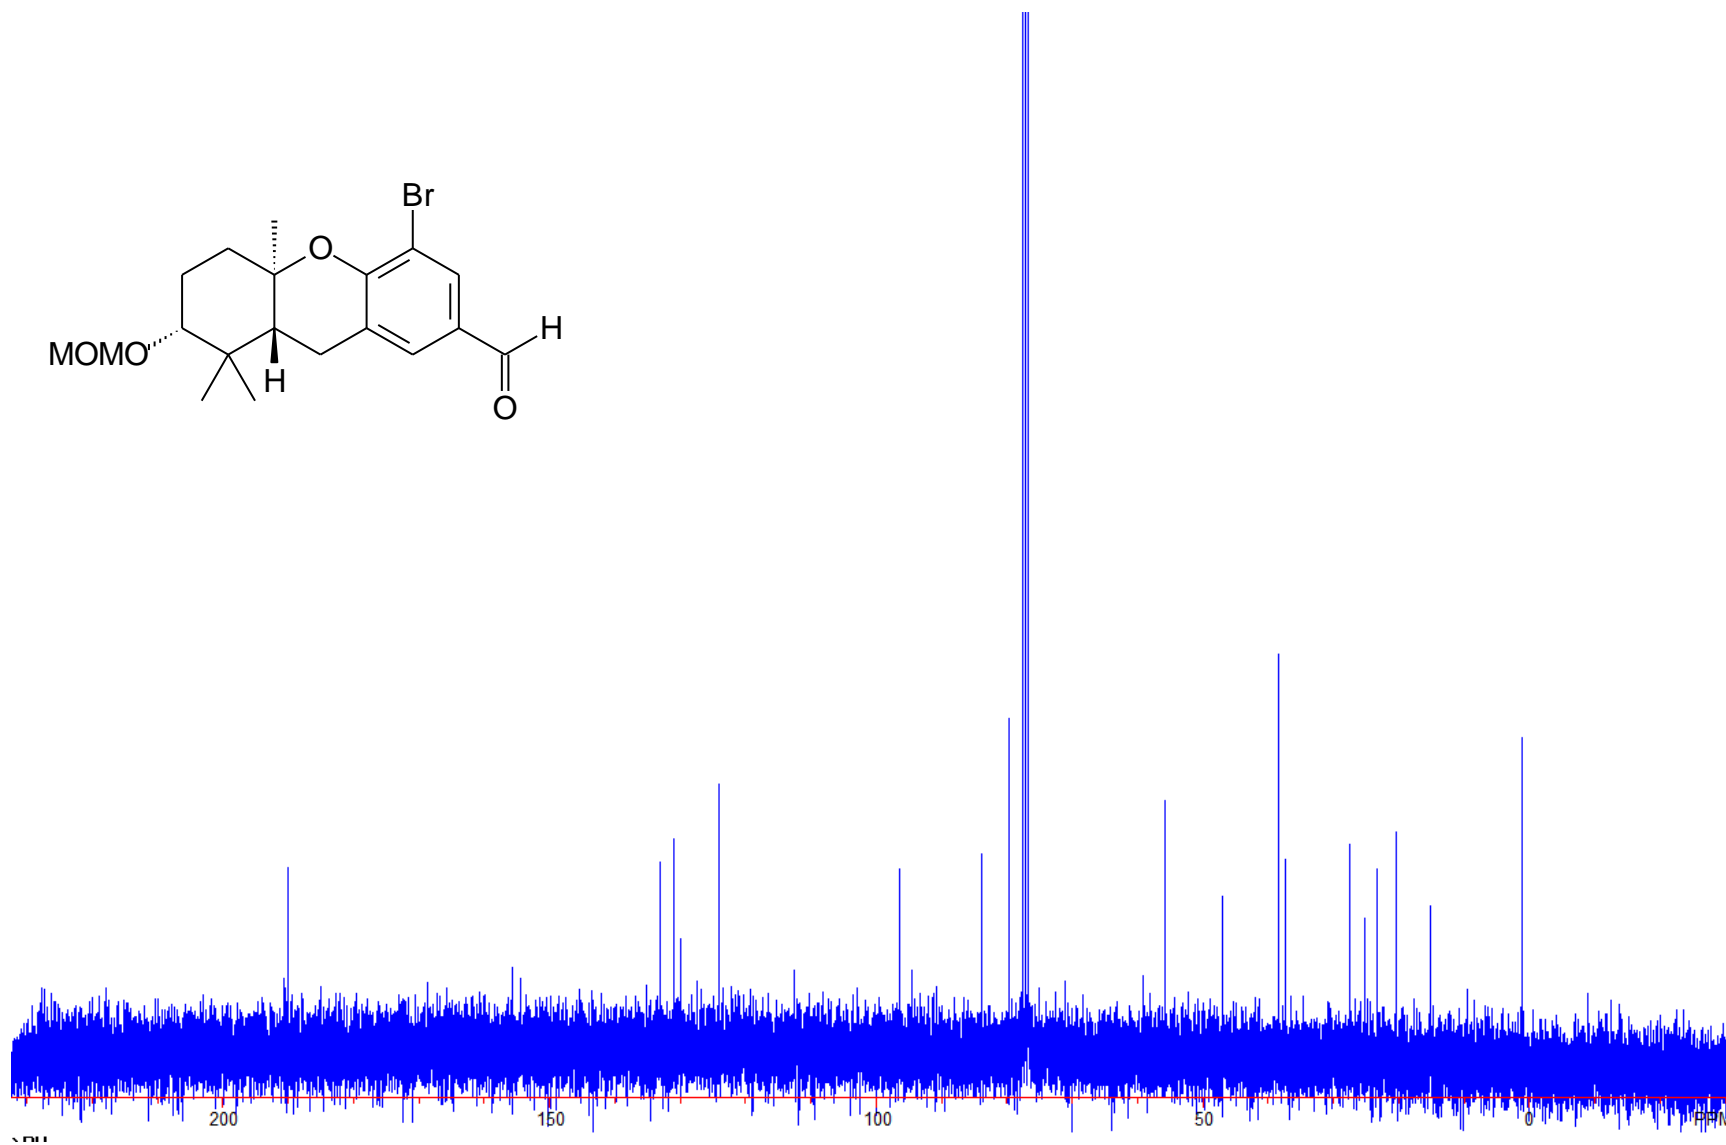

100 MHz  $^{13}\text{C}$  NMR Spectrum of Compound 18

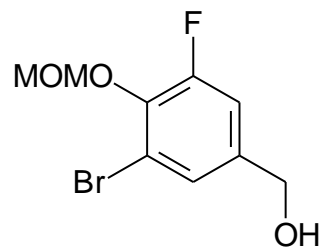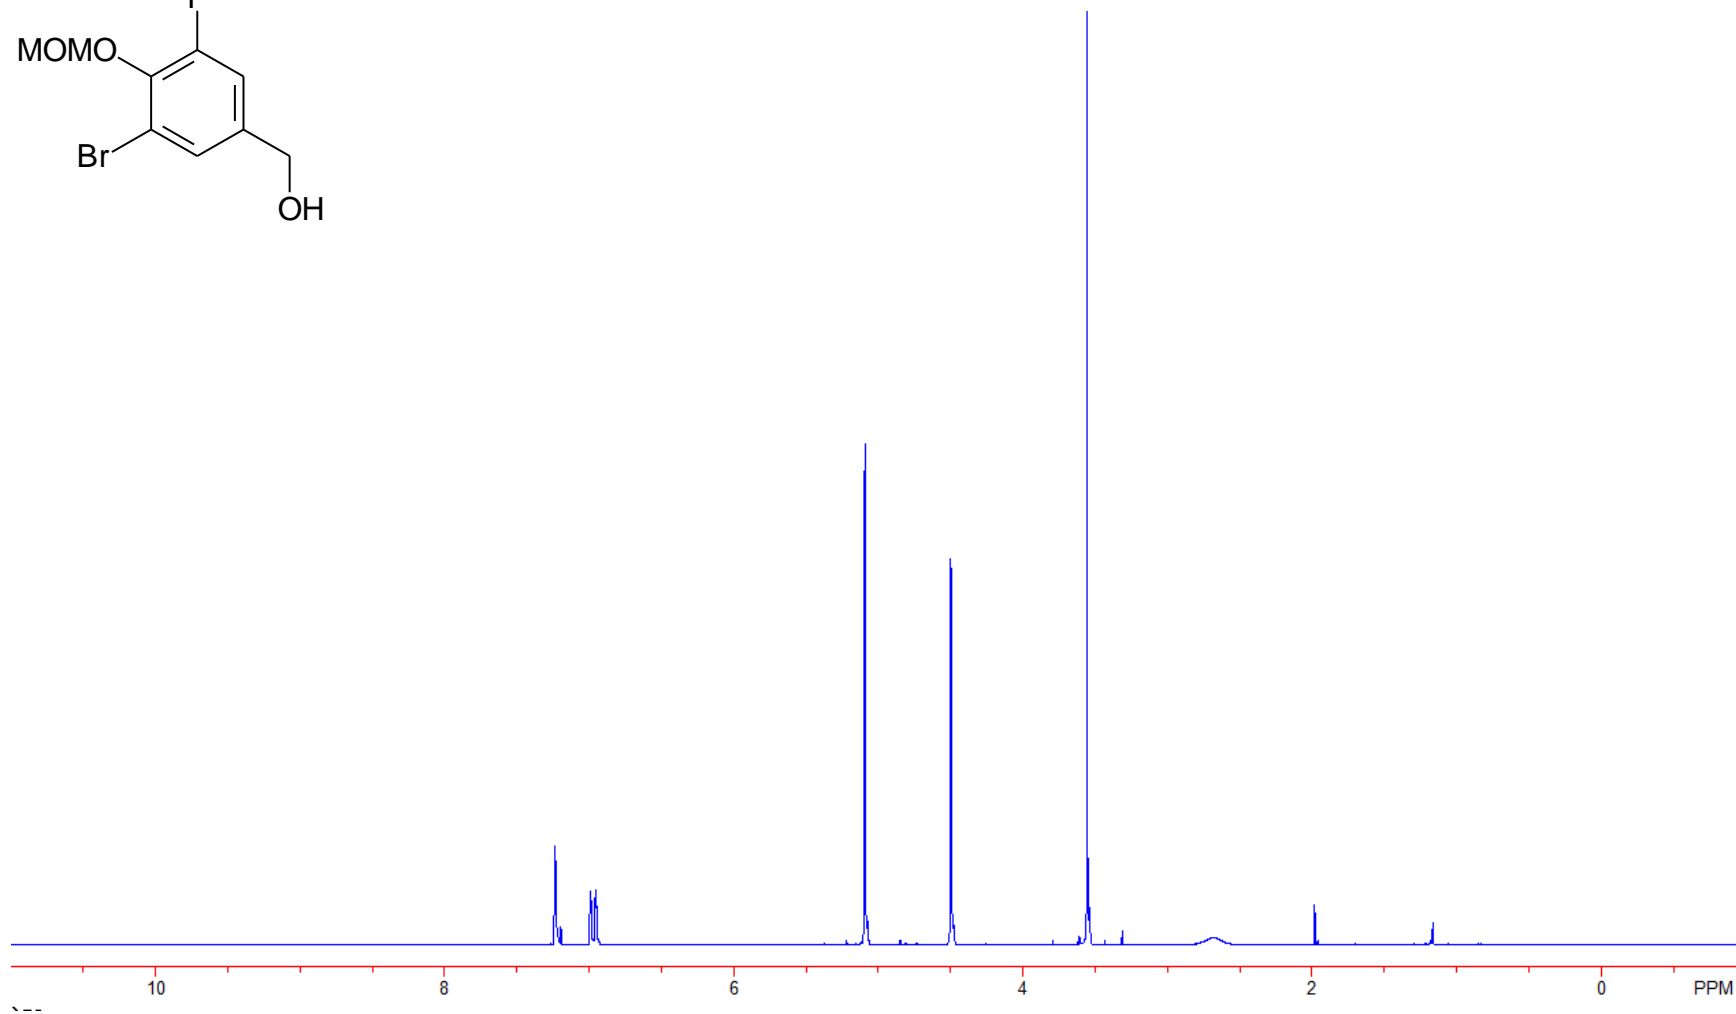

300 MHz <sup>1</sup>H NMR Spectrum of Compound 20

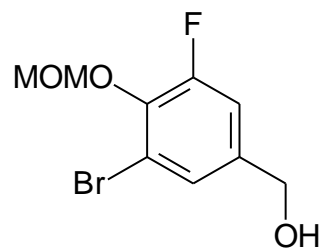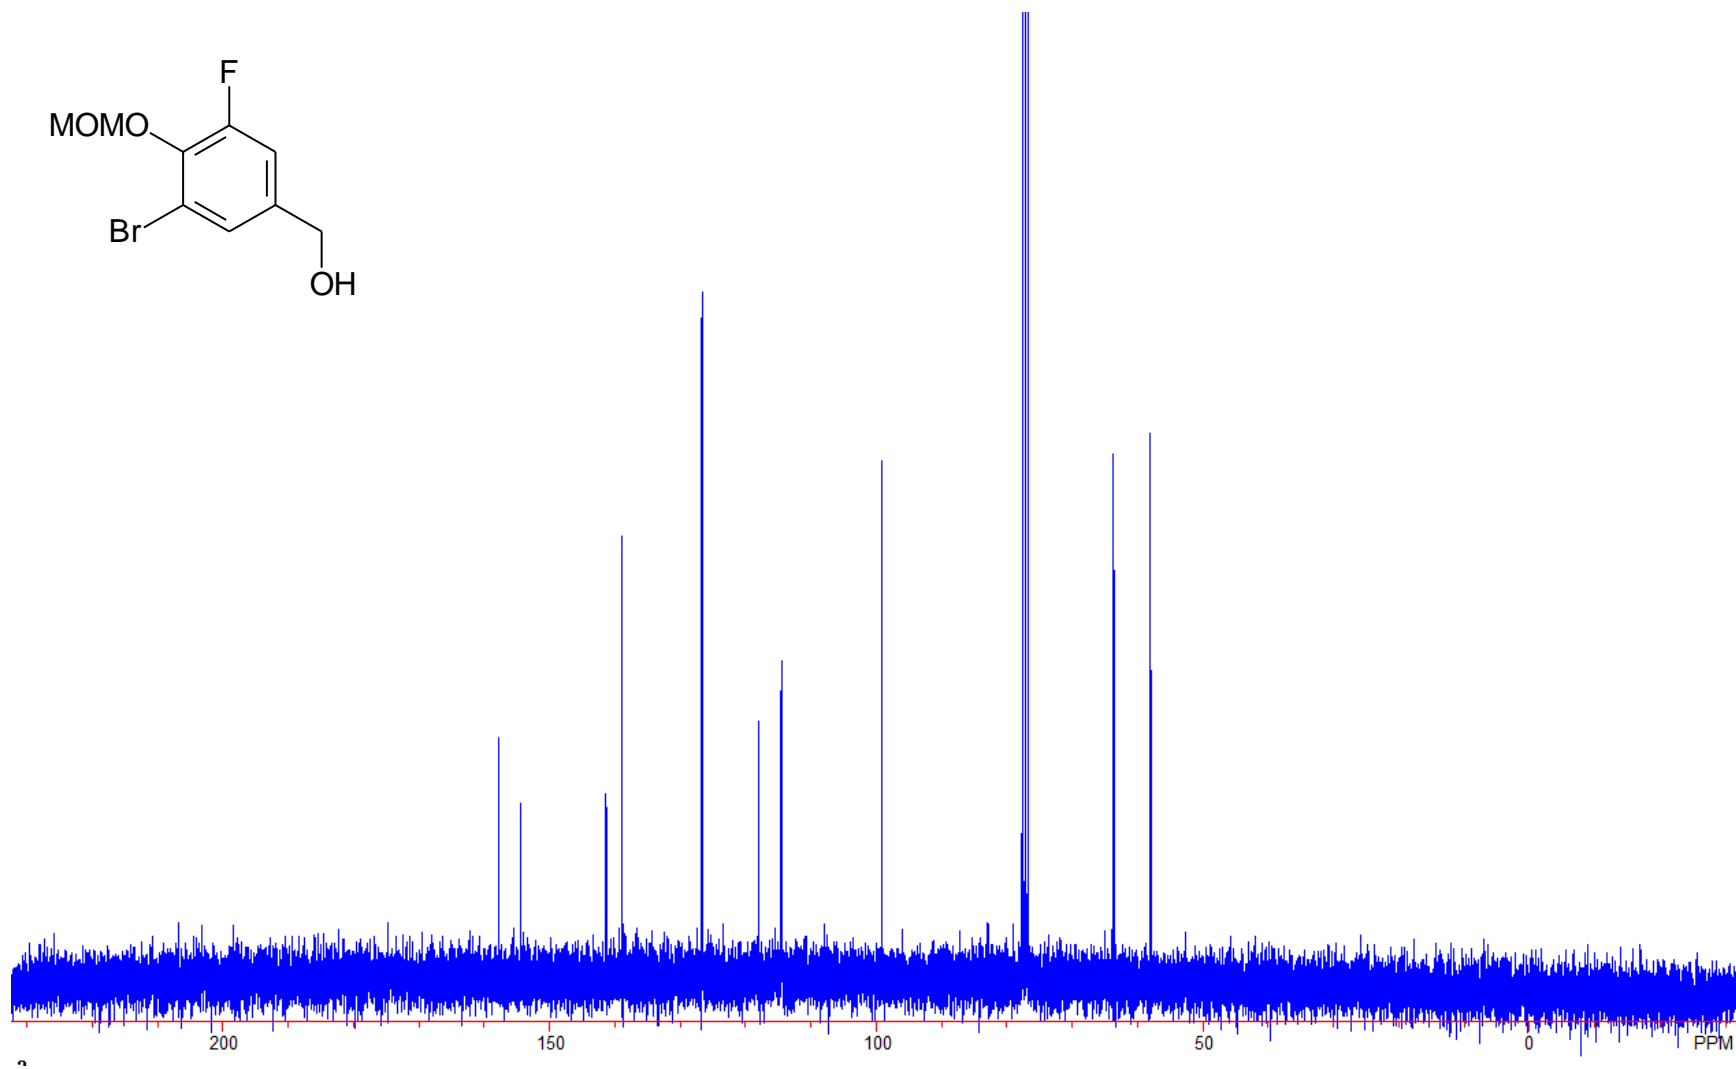

75 MHz <sup>13</sup>C NMR Spectrum of Compound **20**

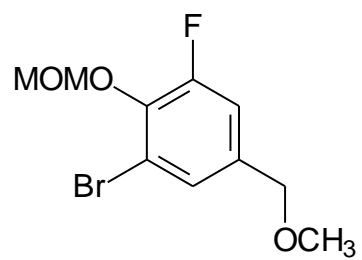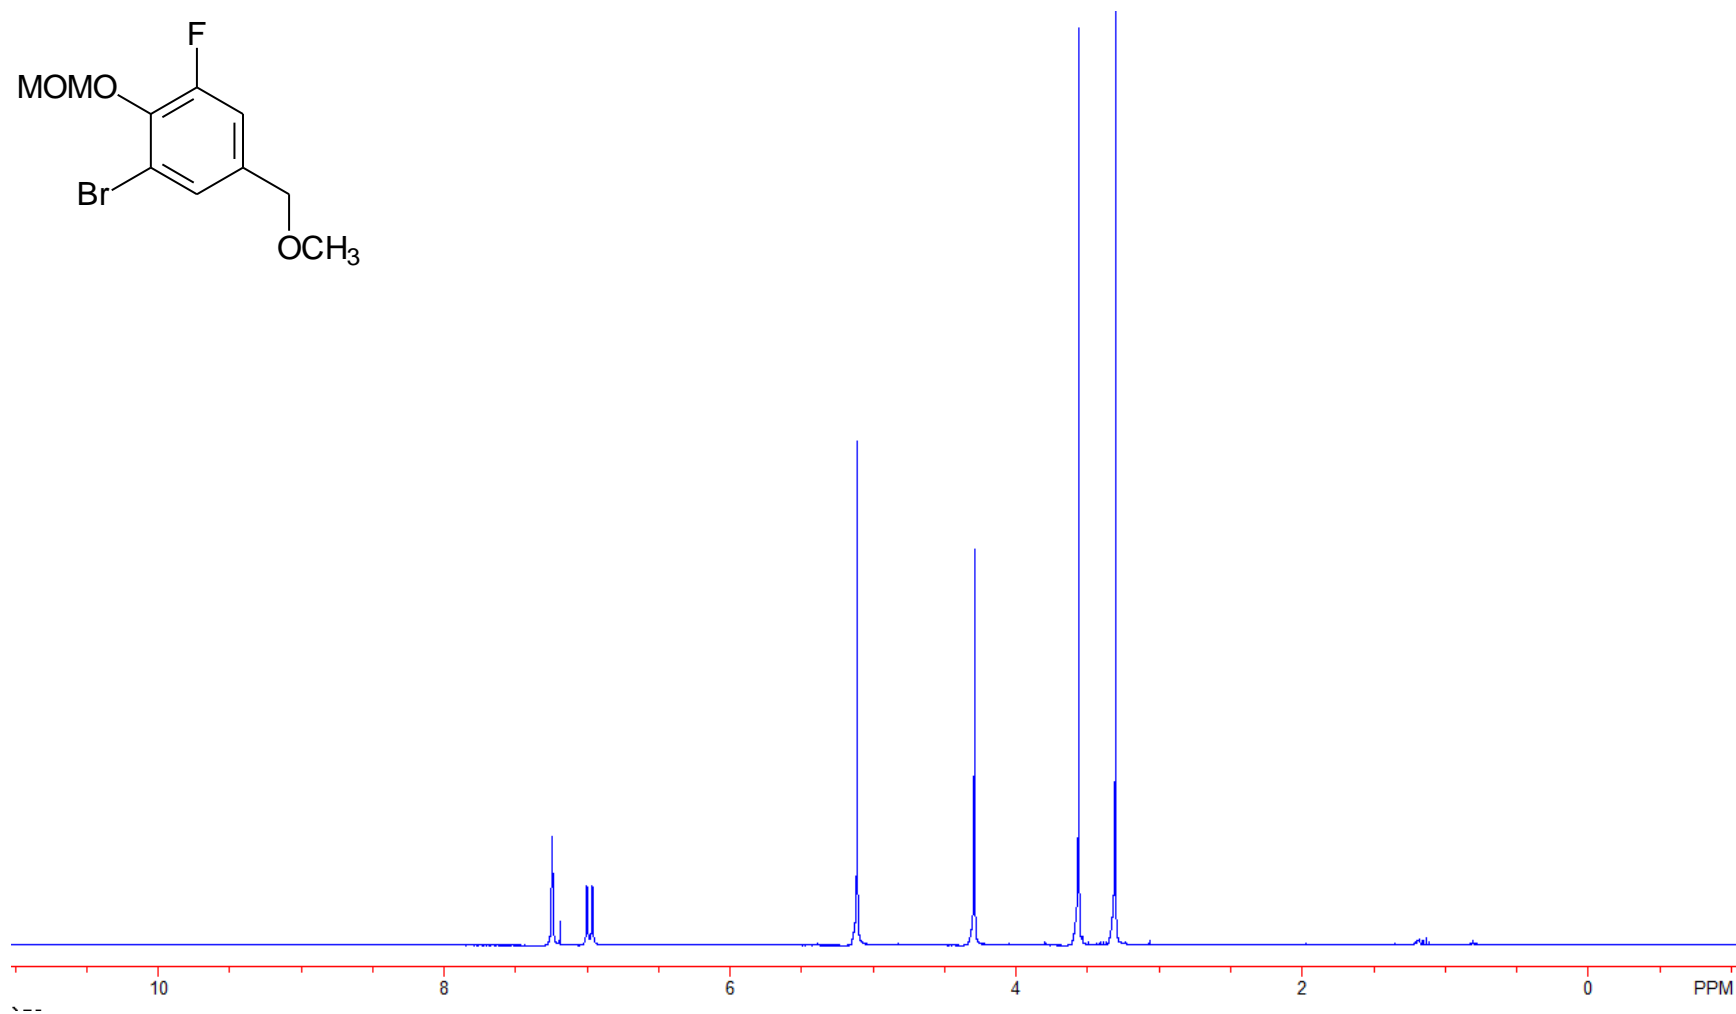

400 MHz <sup>1</sup>H NMR Spectrum of Compound 21

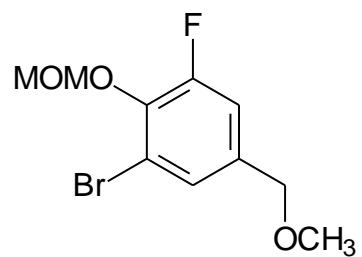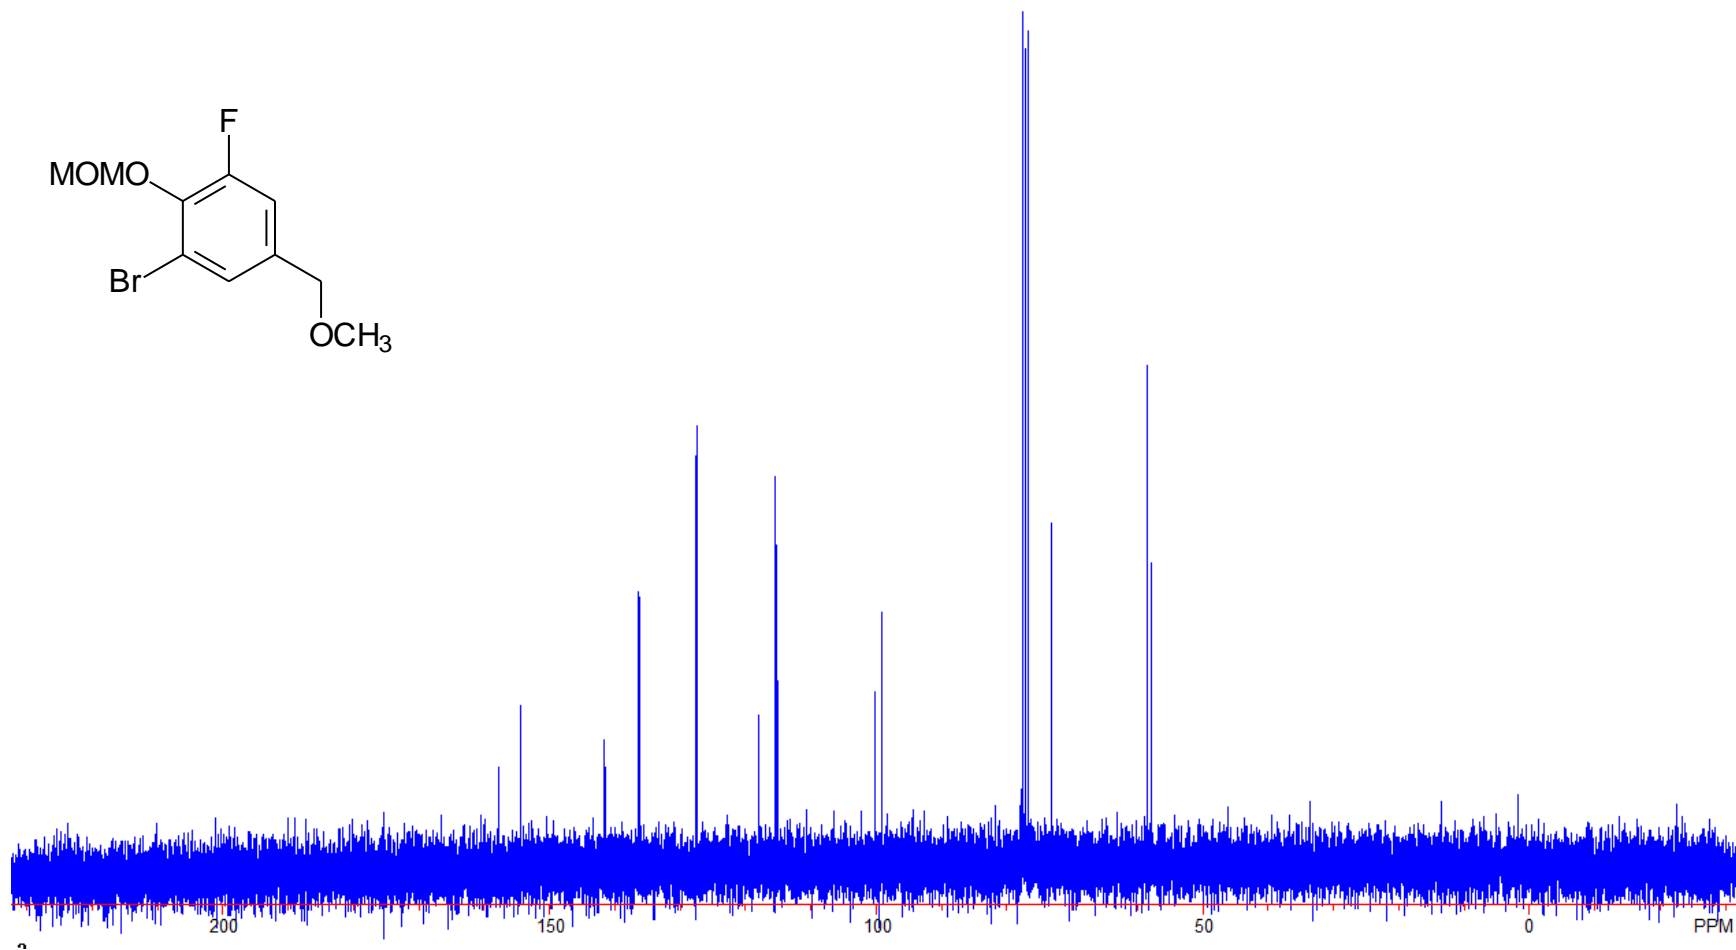

100 MHz <sup>13</sup>C NMR Spectrum of Compound 21

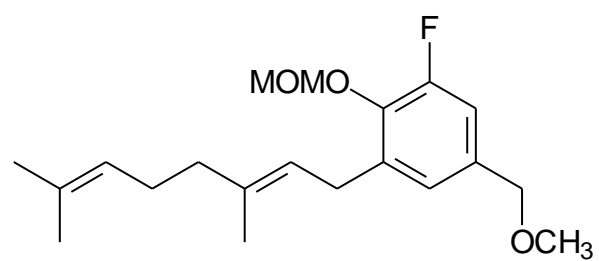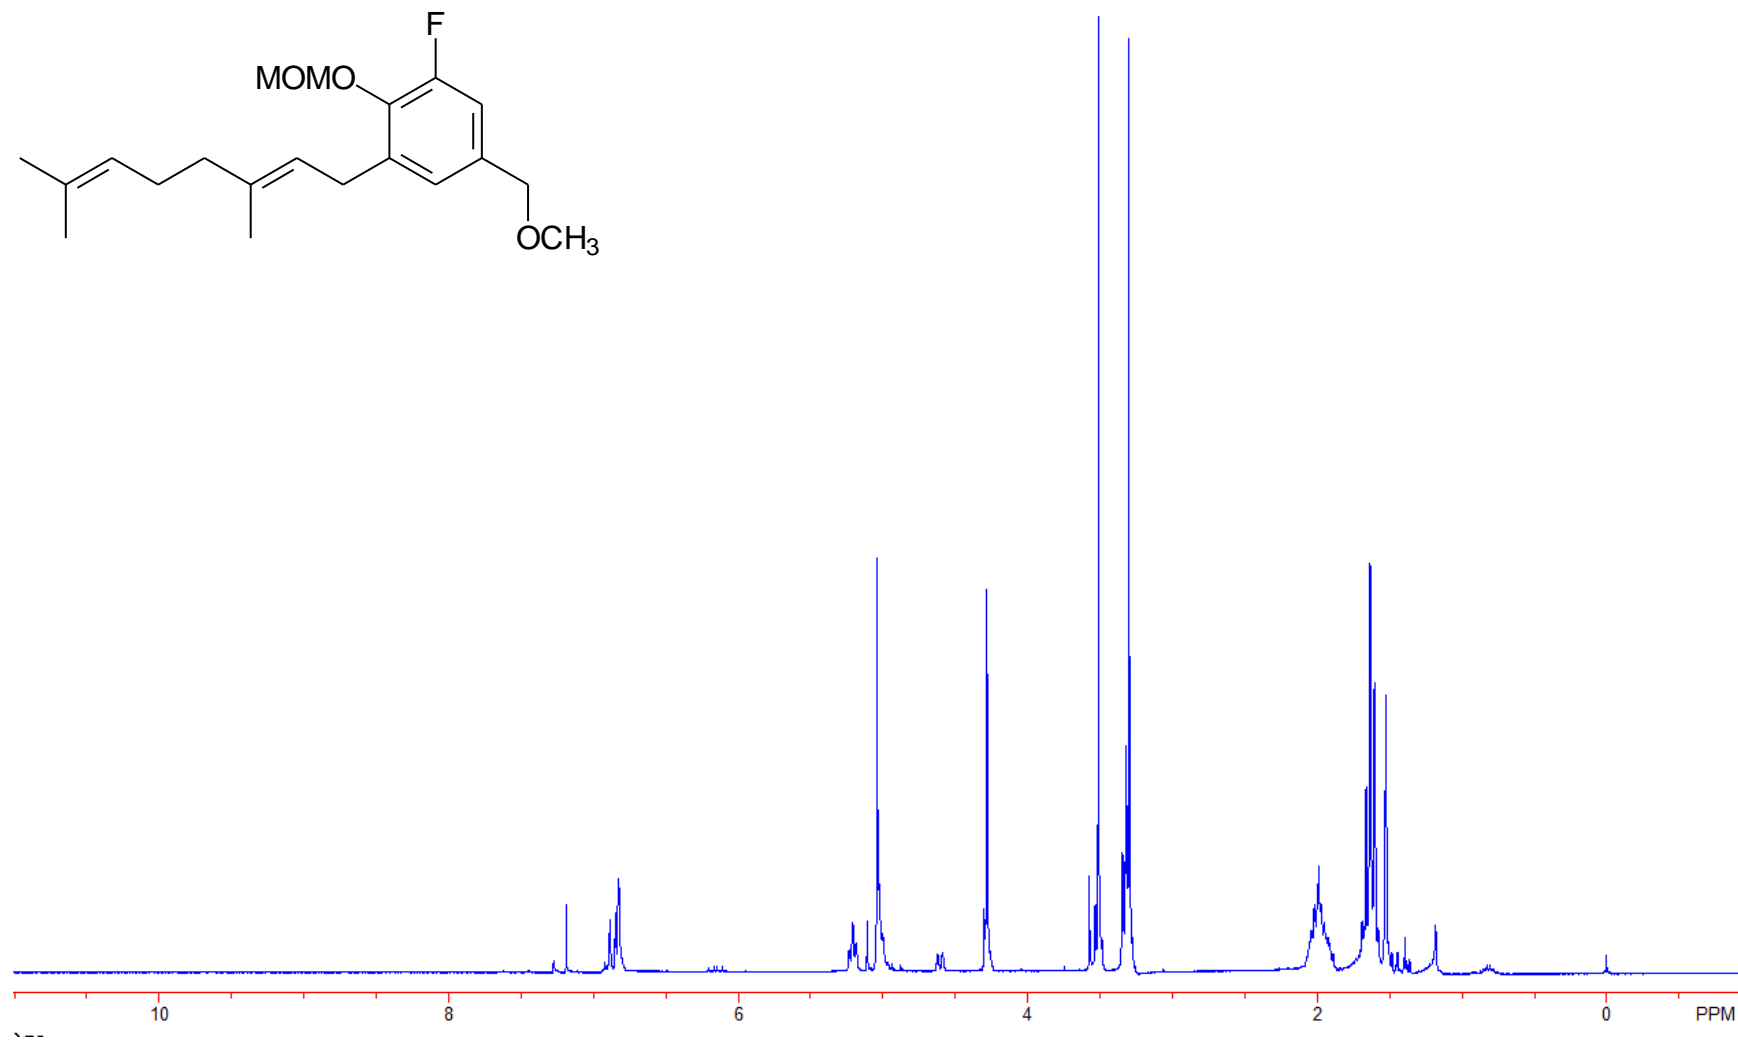

300 MHz  $^1\text{H}$  NMR Spectrum of Compound 22

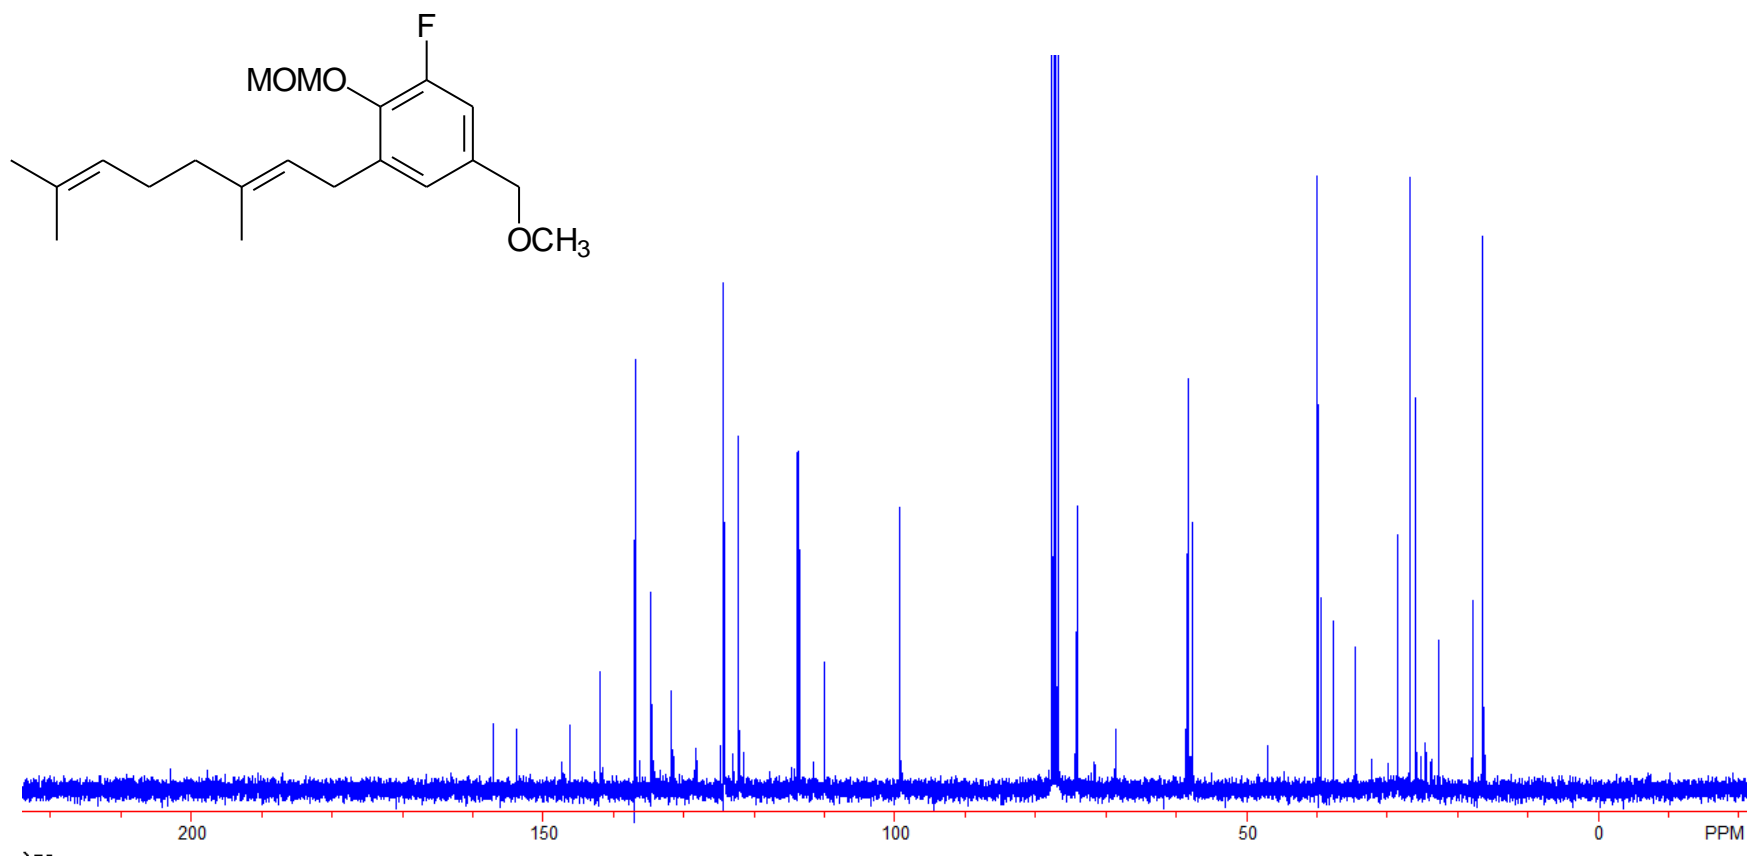

75 MHz  $^{13}\text{C}$  NMR Spectrum of Compound **22**

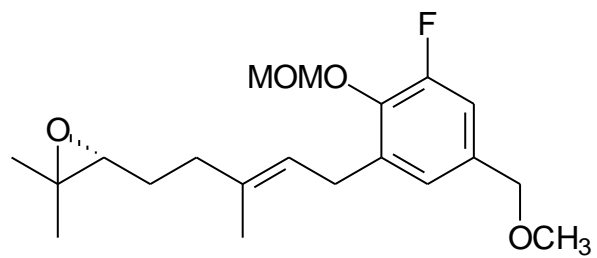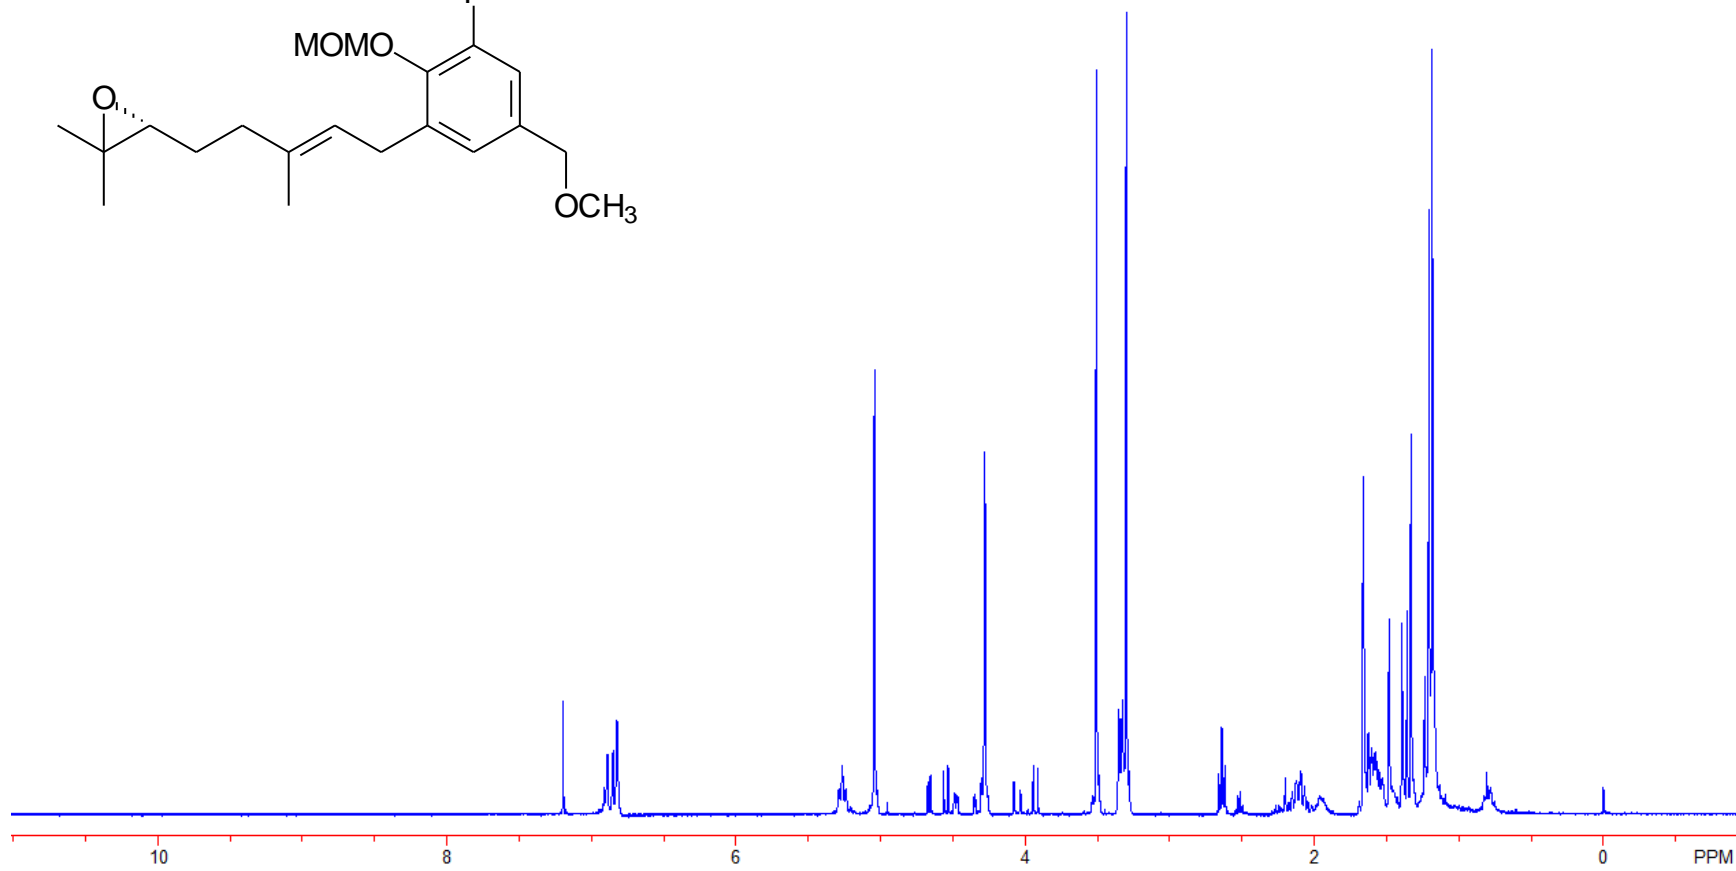

400 MHz <sup>1</sup>H NMR Spectrum of Compound 23



107\DATA\smpe8-091\_2

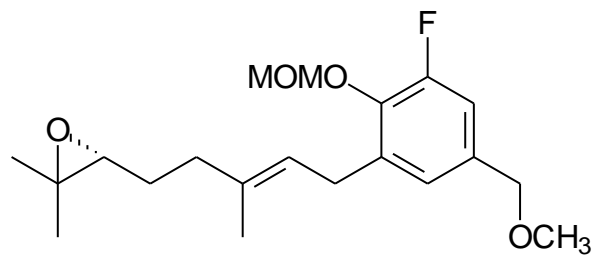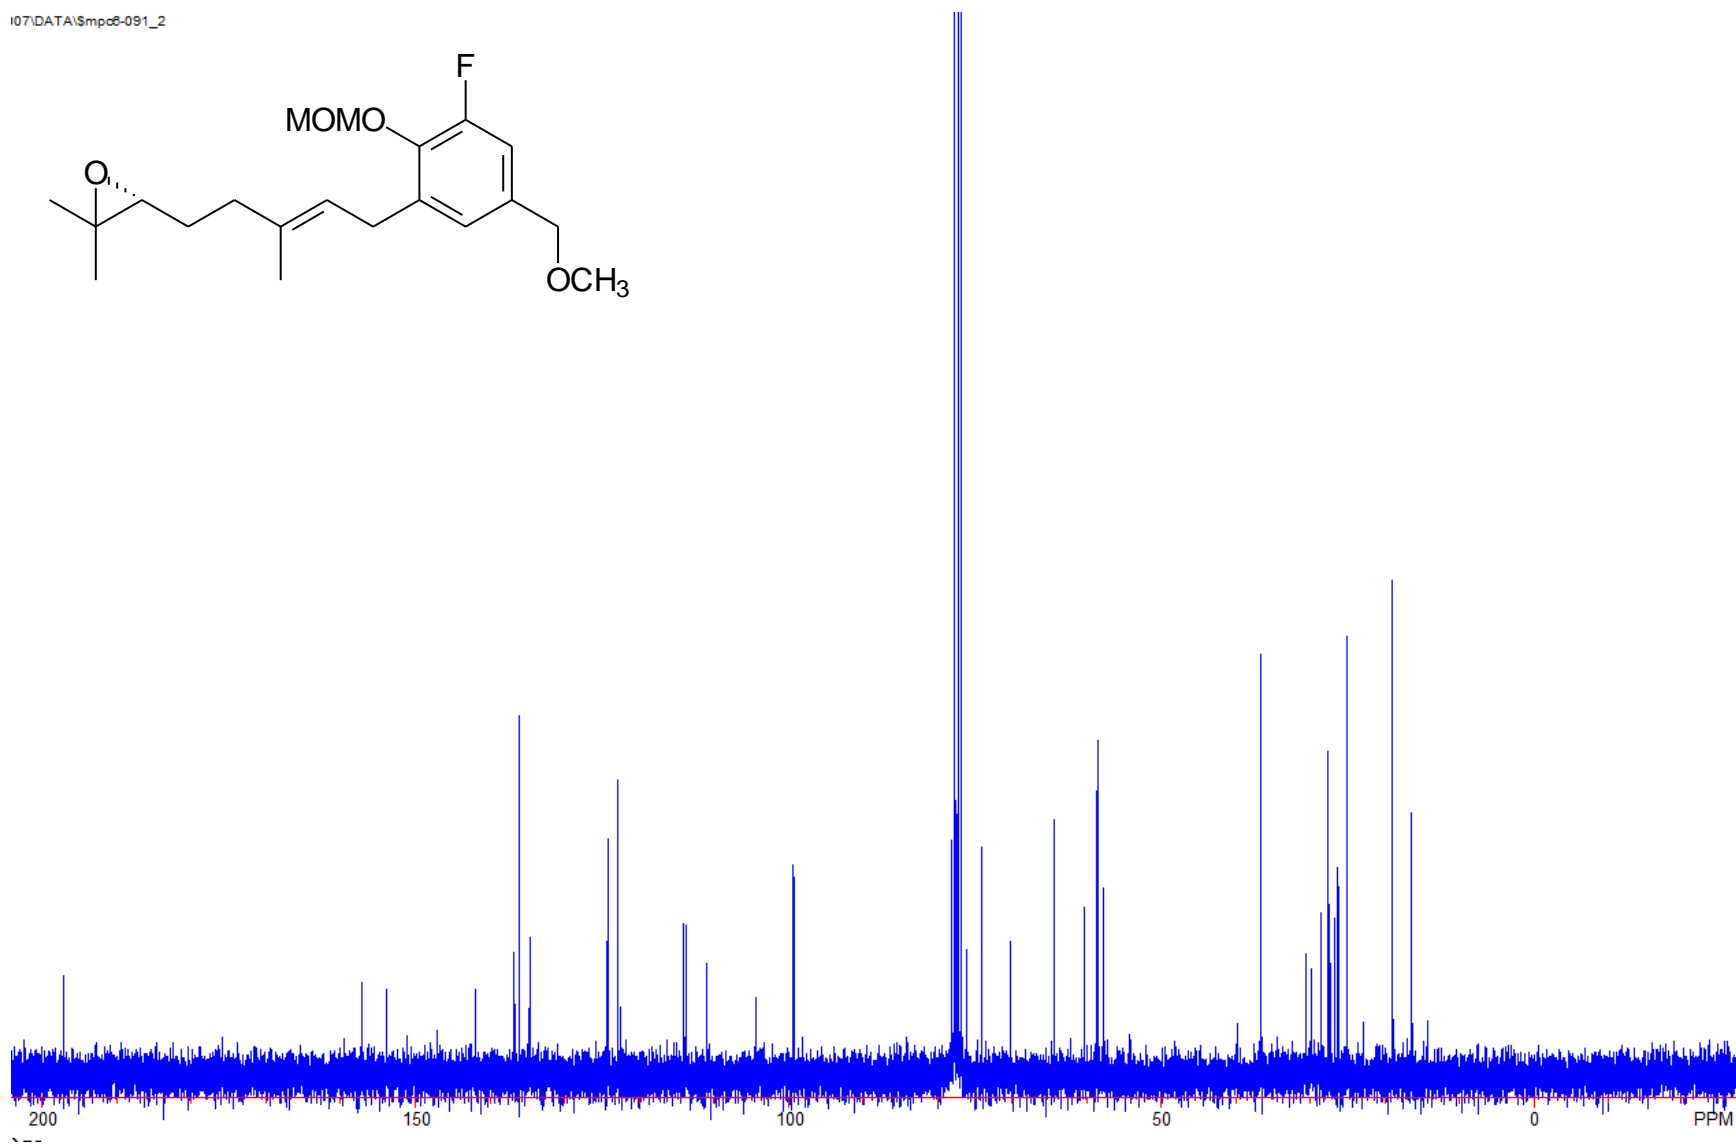

100 MHz <sup>13</sup>C NMR Spectrum of Compound 23

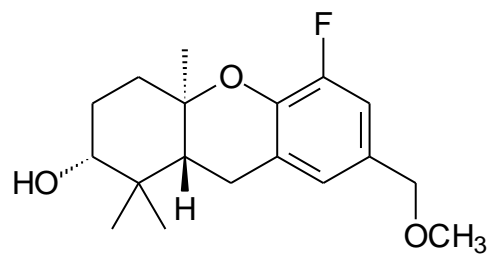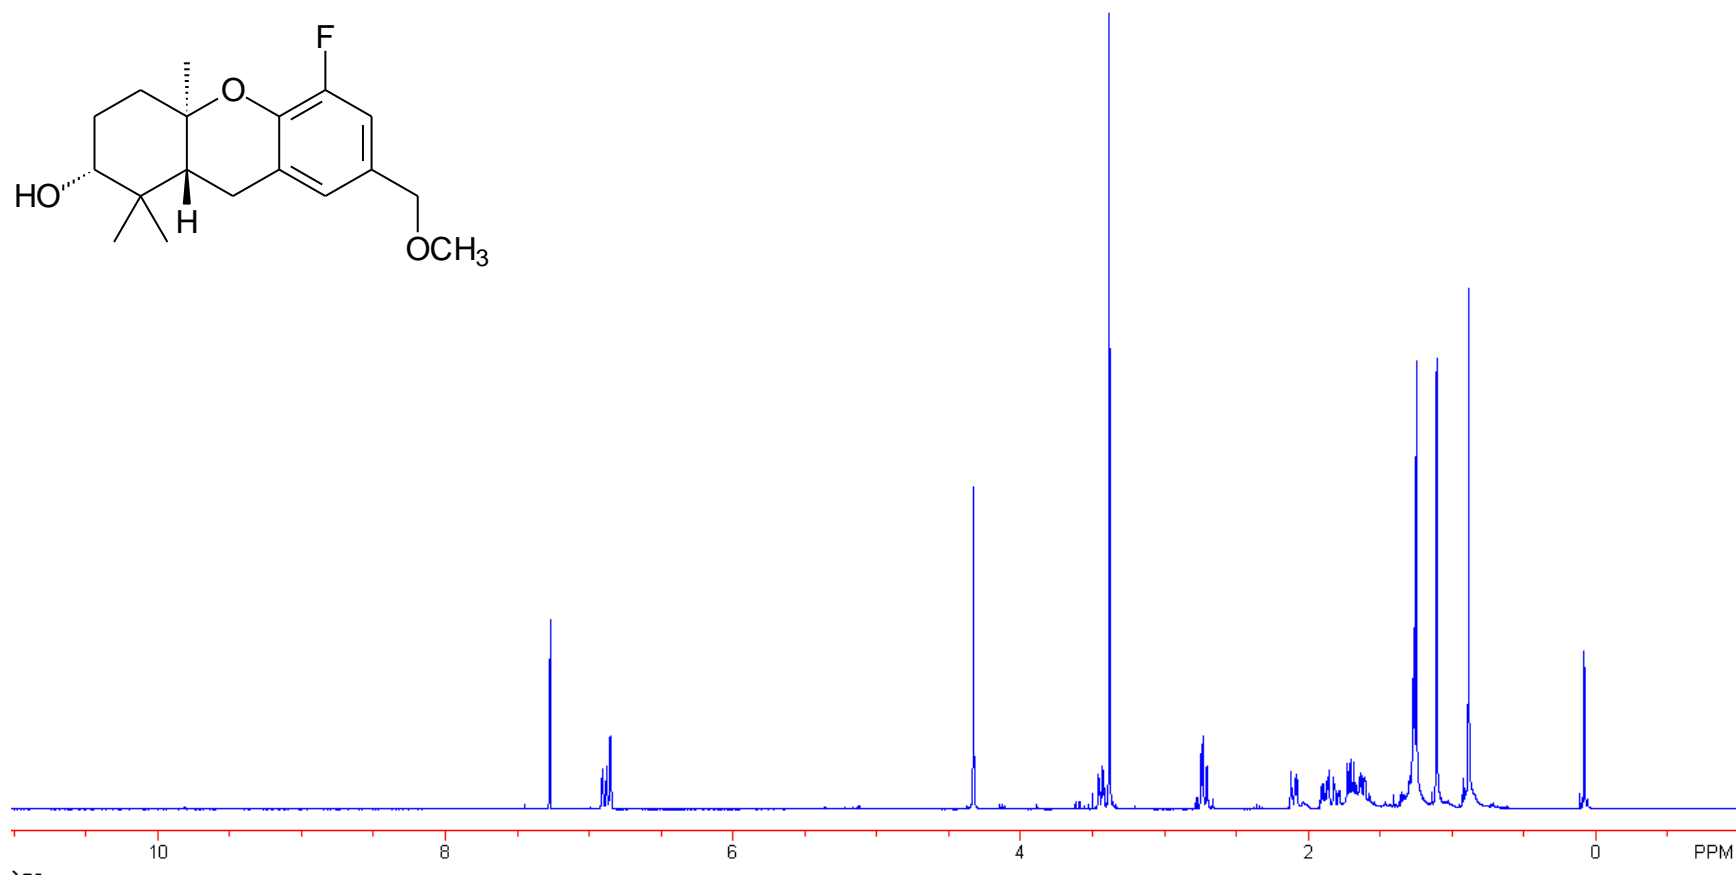

400 MHz <sup>1</sup>H NMR Spectrum of Compound 24

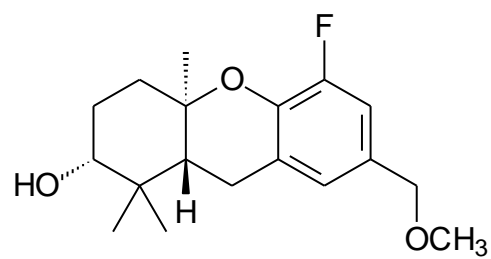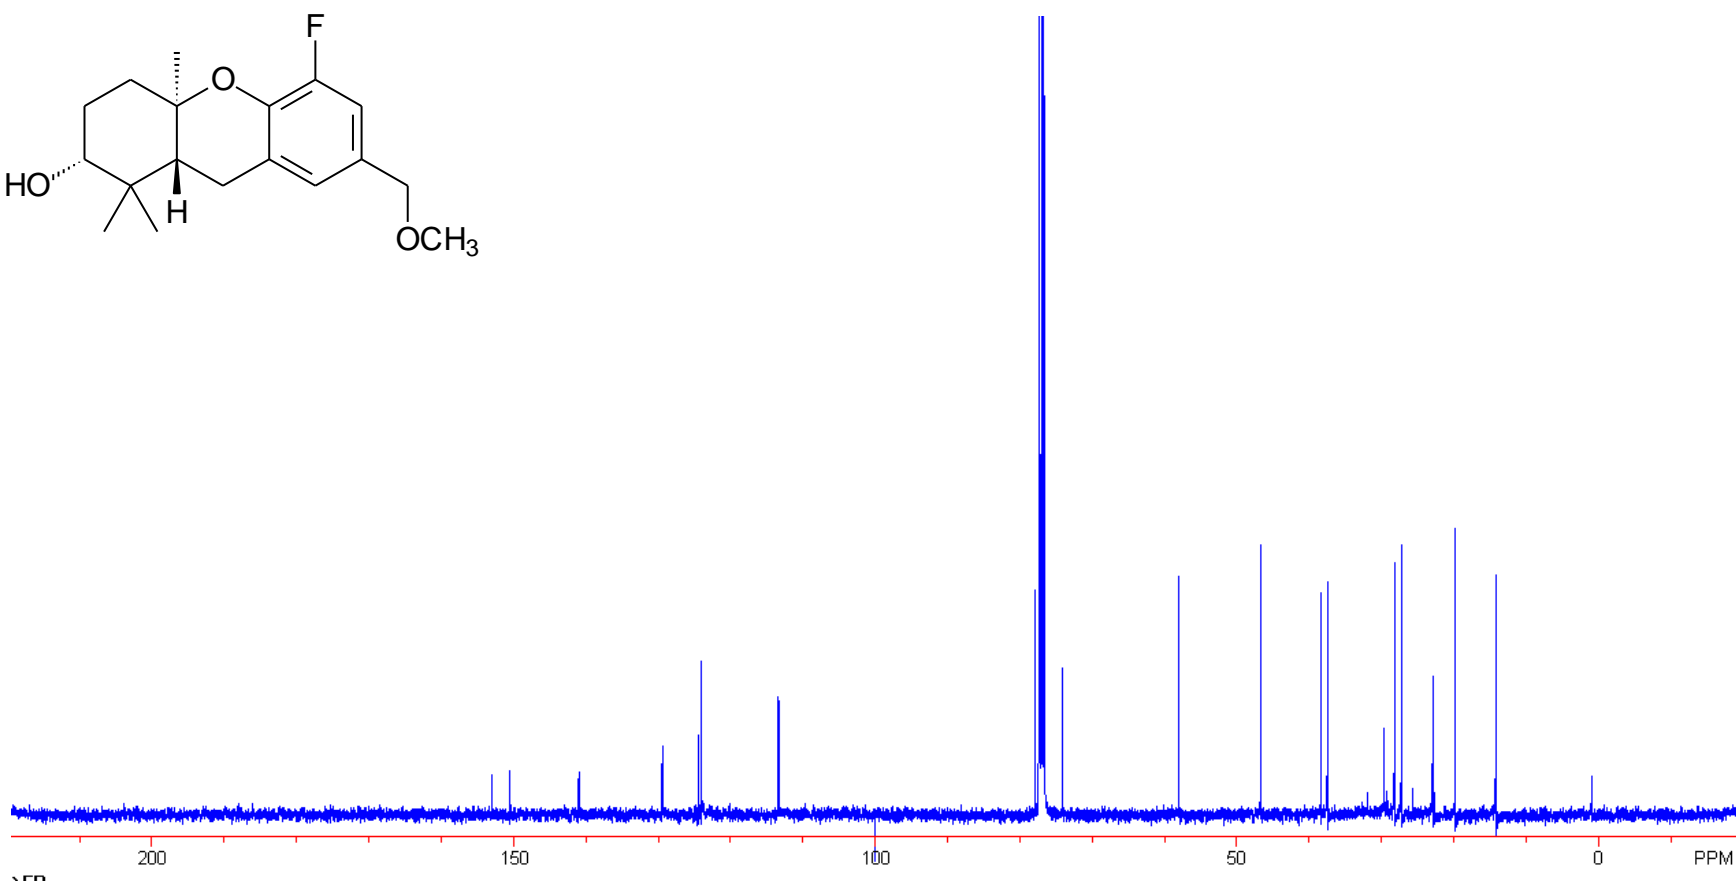

100 MHz <sup>13</sup>C NMR Spectrum of Compound 24

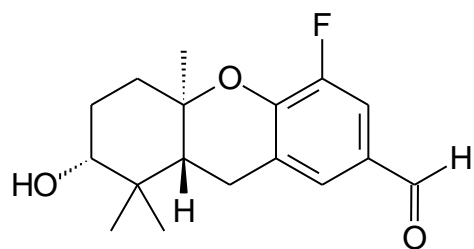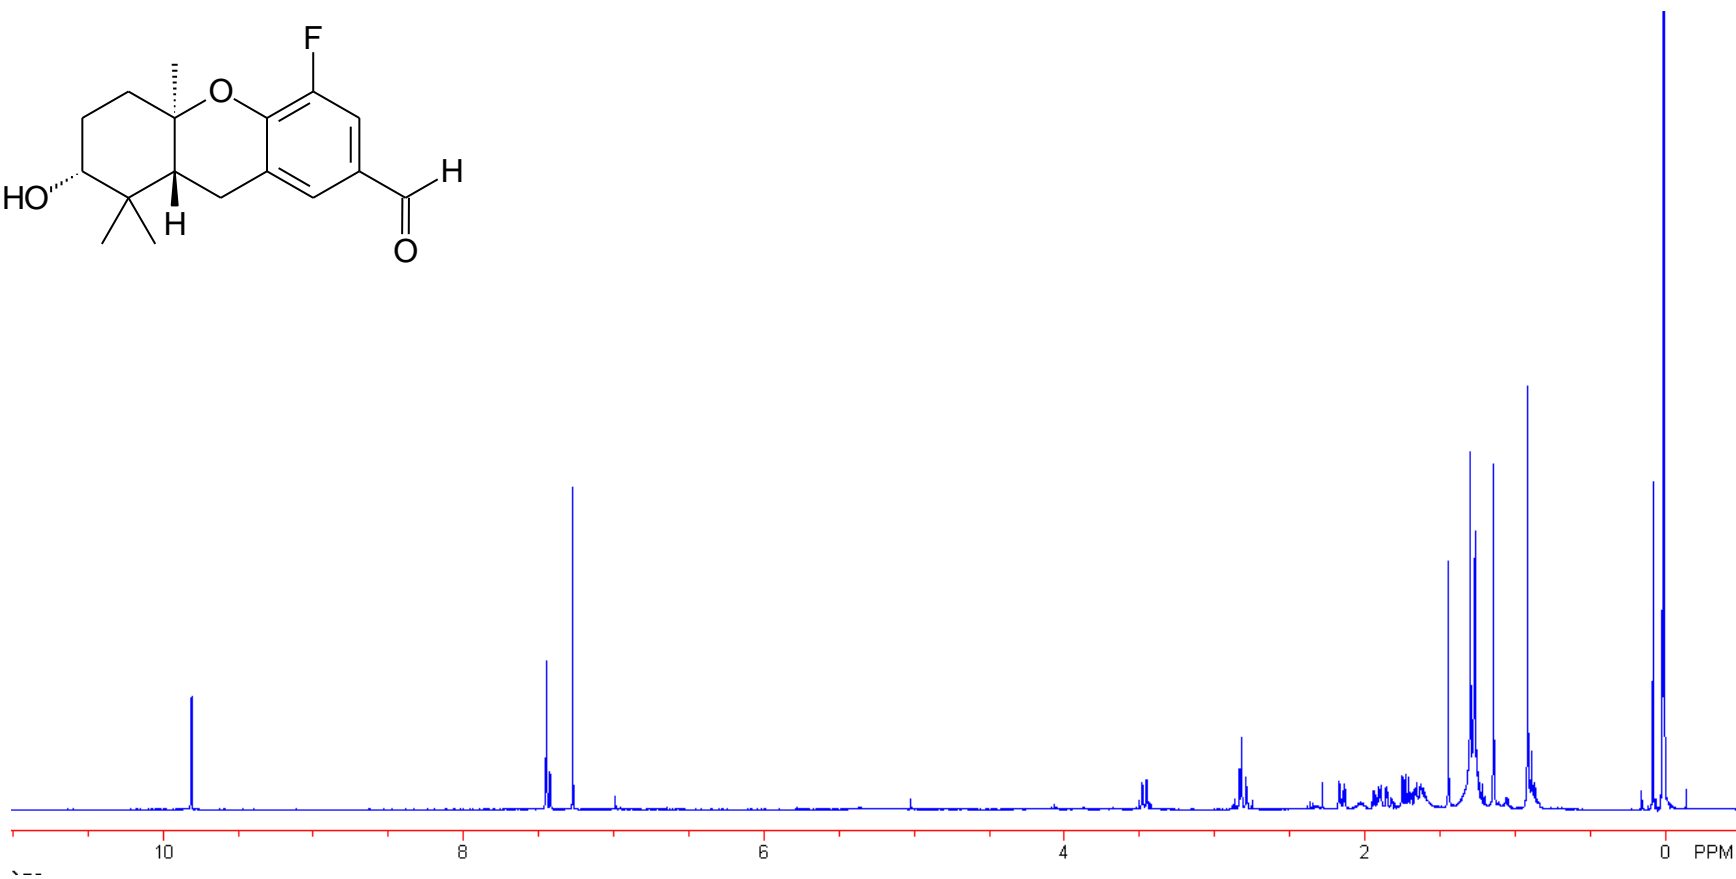

400 MHz <sup>1</sup>H NMR Spectrum of Compound 25

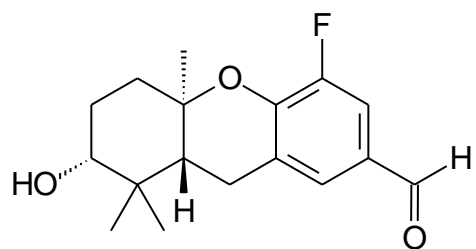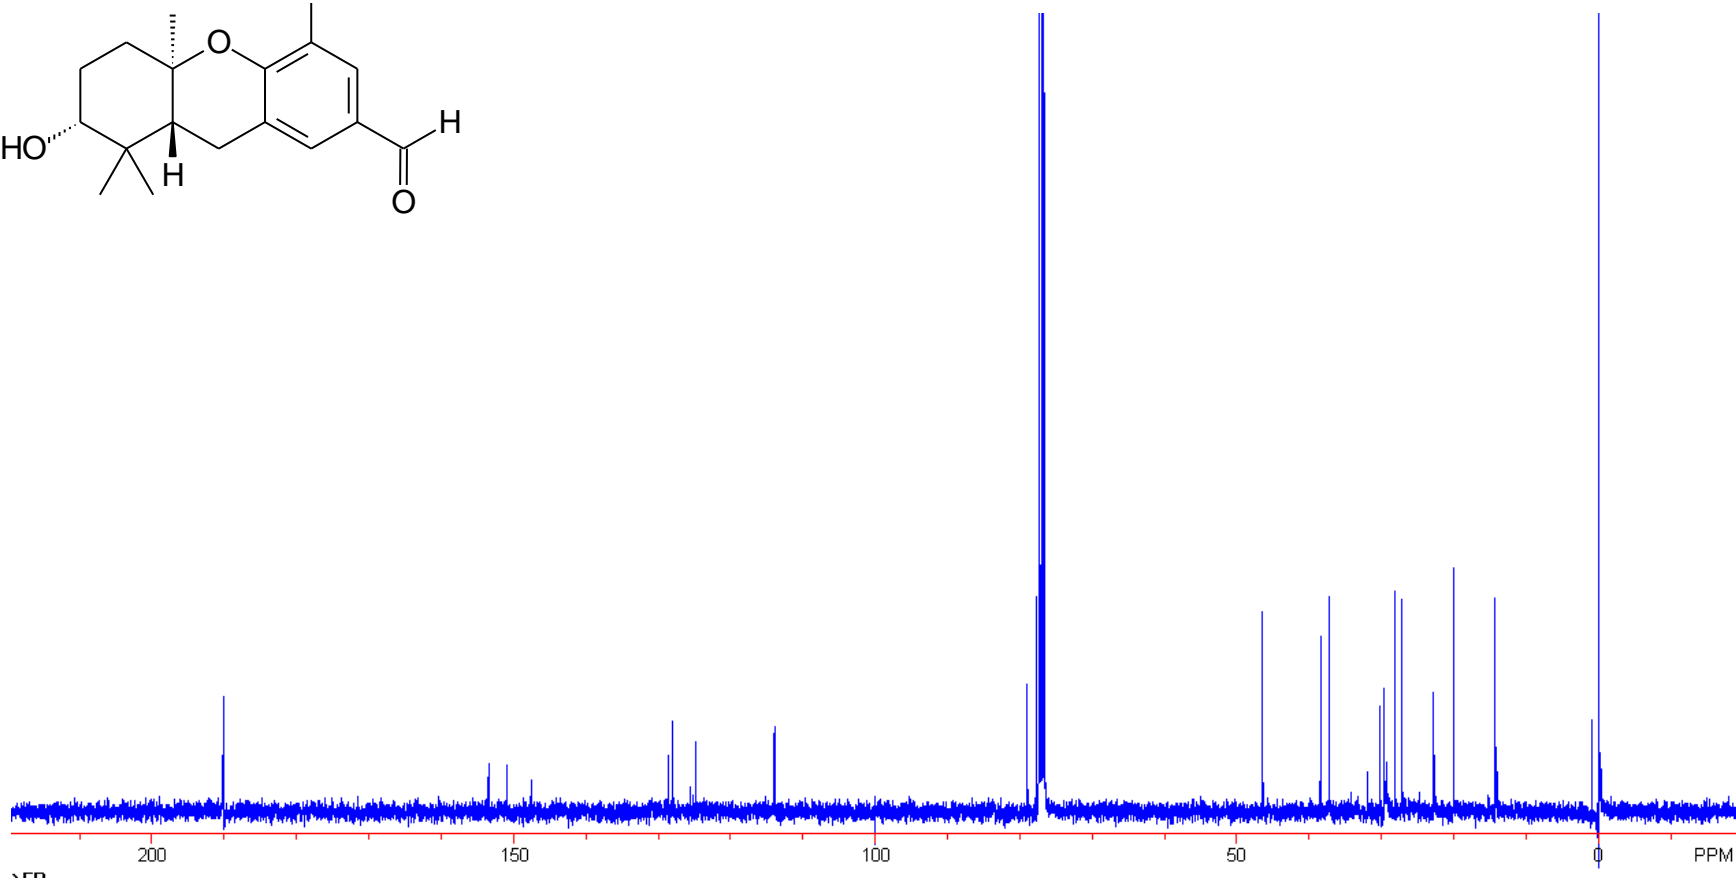

100 MHz  $^{13}\text{C}$  NMR Spectrum of Compound 25

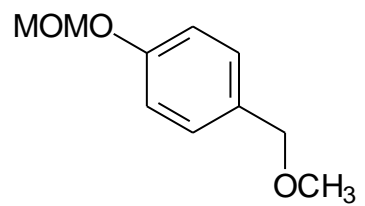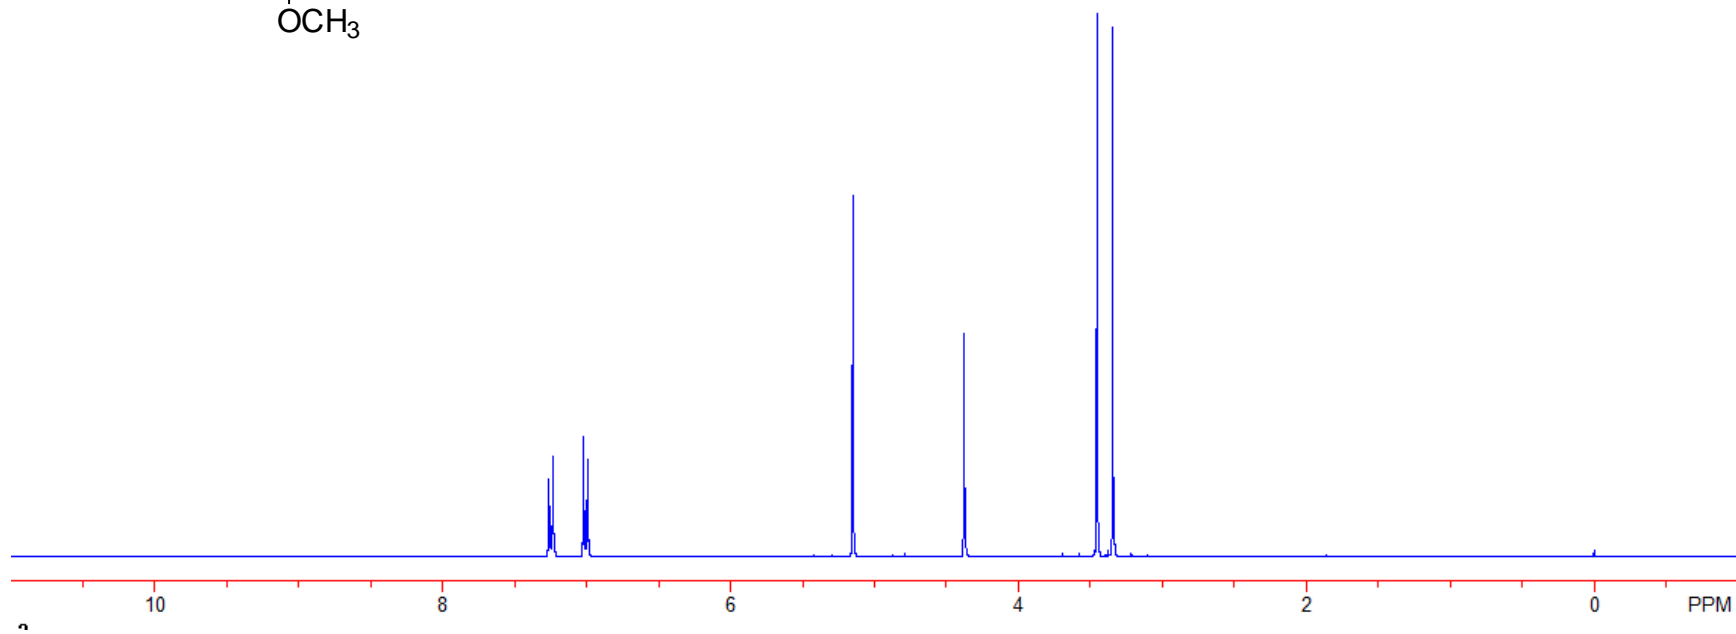

300 MHz <sup>1</sup>H NMR Spectrum of Compound **27**

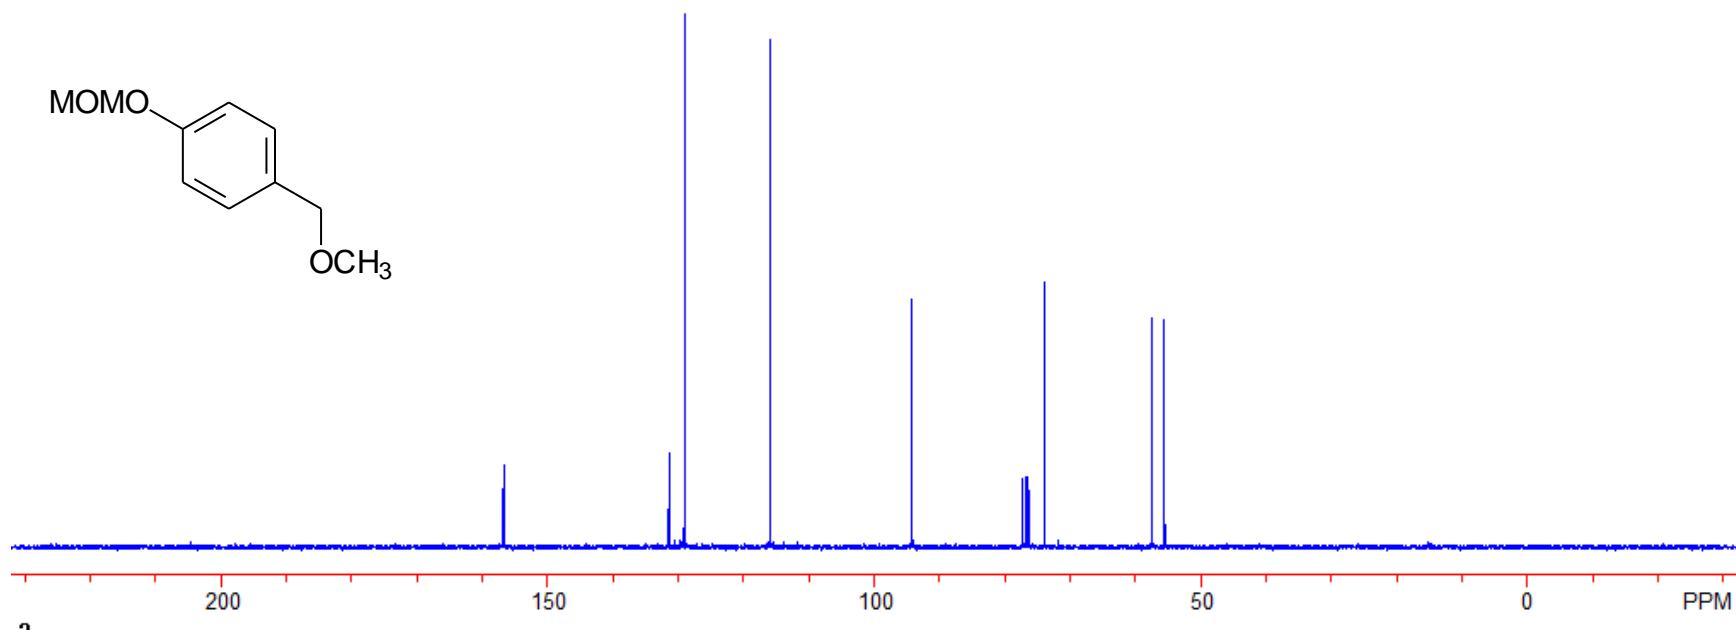

75 MHz <sup>13</sup>C NMR Spectrum of Compound **27**

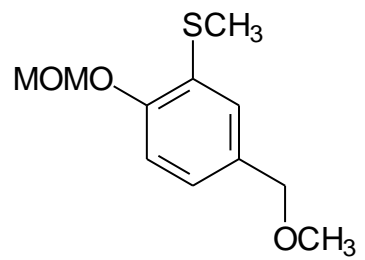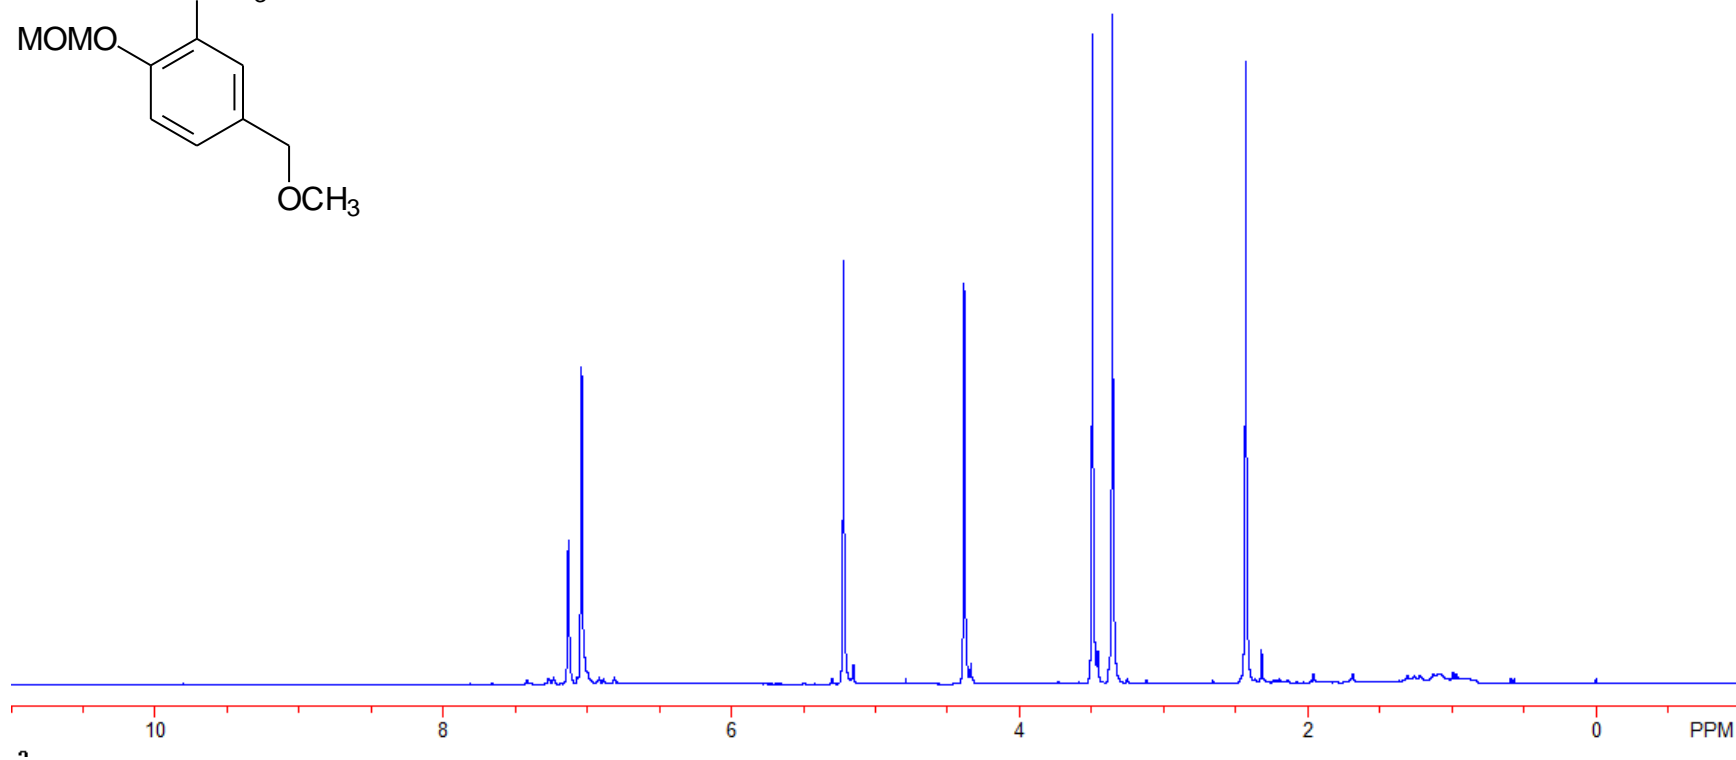

300 MHz <sup>1</sup>H NMR Spectrum of Compound 28



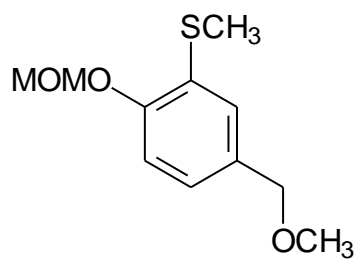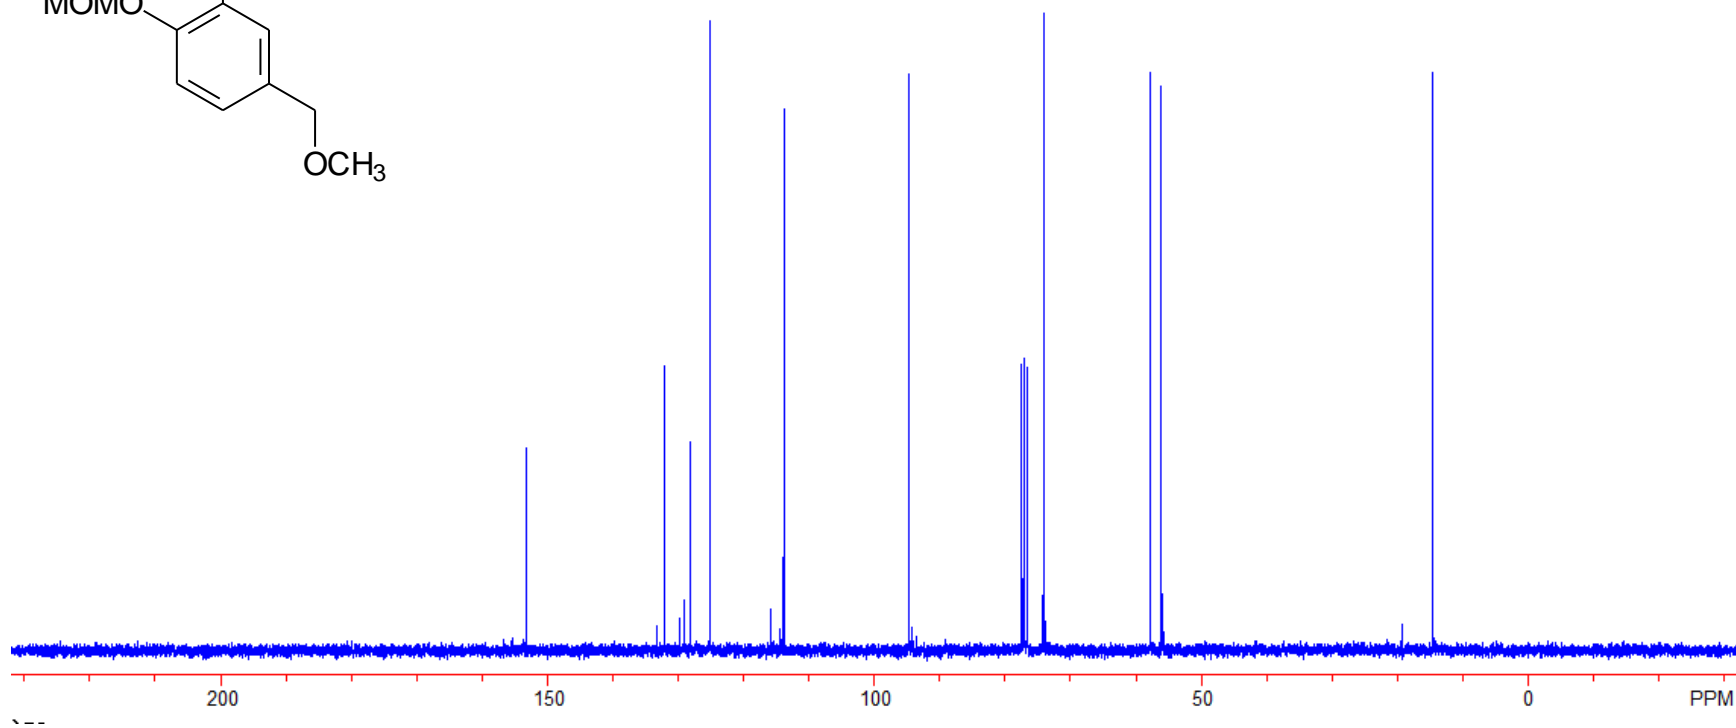

75 MHz <sup>13</sup>C NMR Spectrum of Compound 28

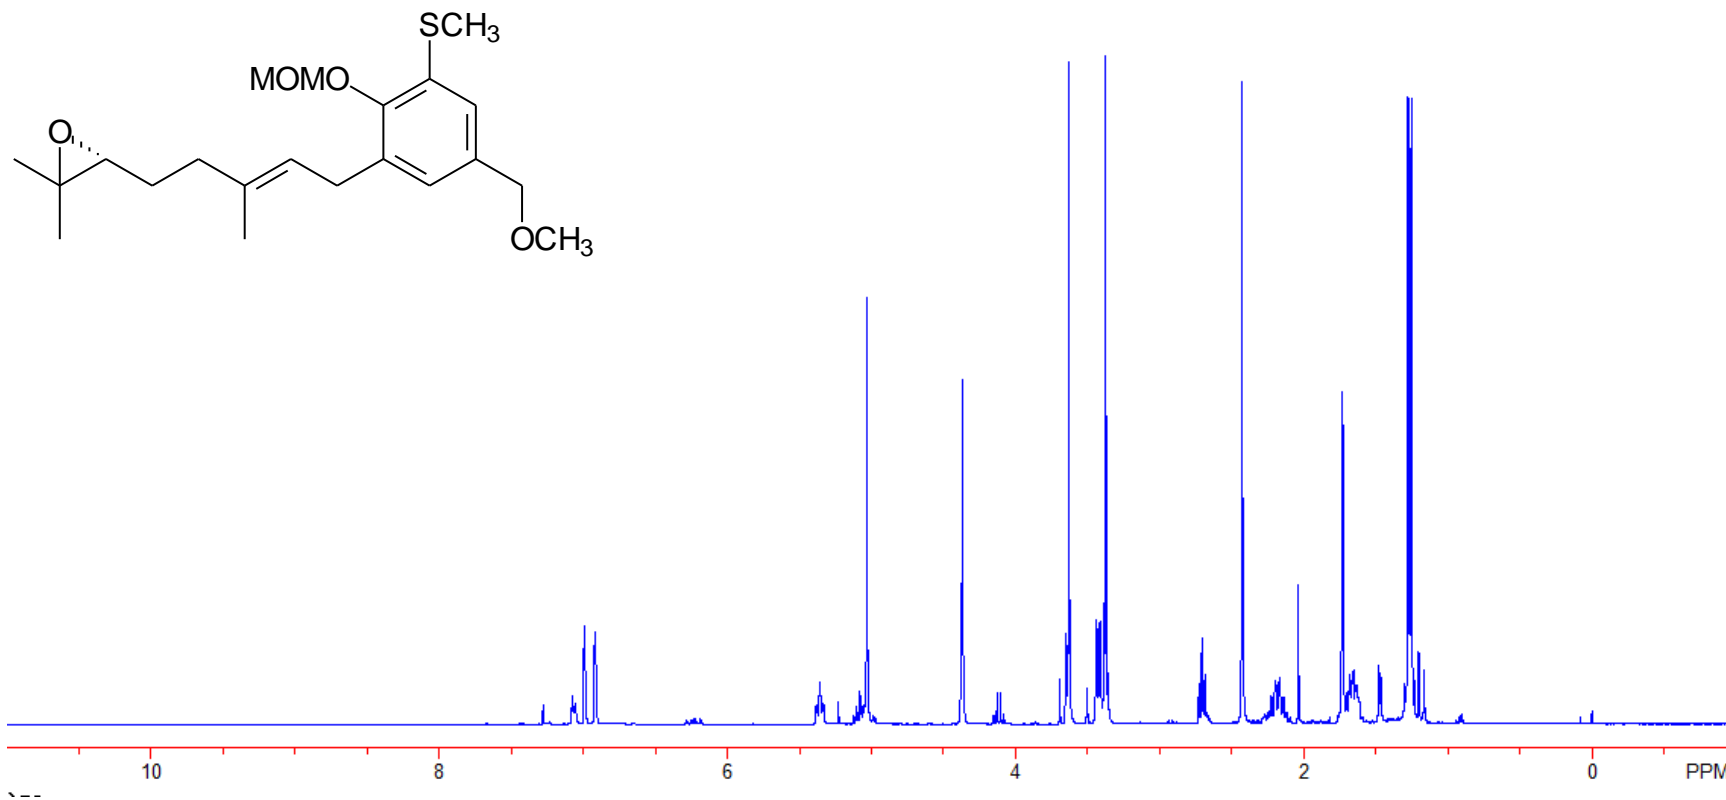

300 MHz  $^1\text{H}$  NMR Spectrum of Compound 29

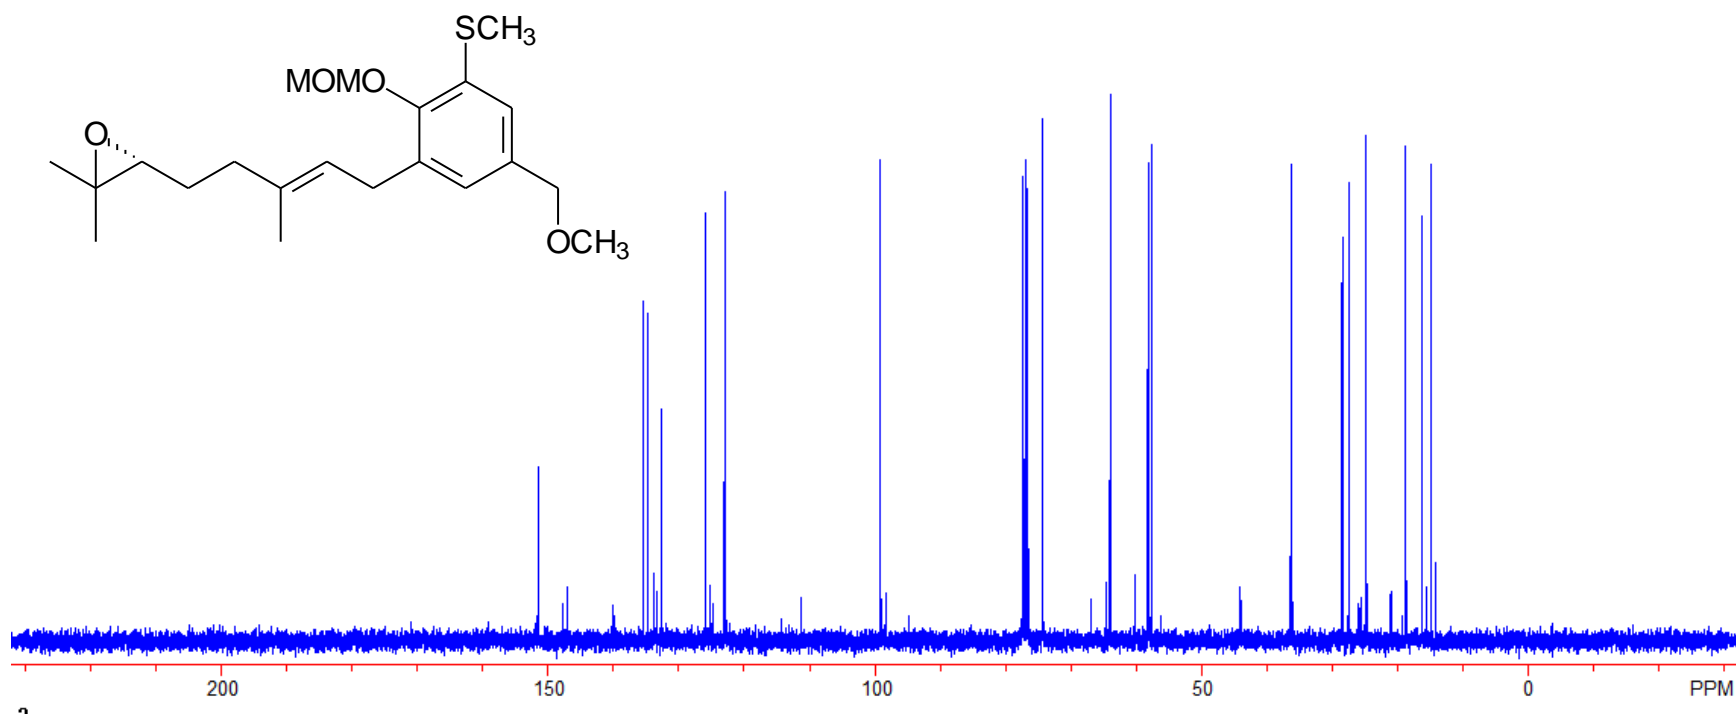

75 MHz <sup>13</sup>C NMR Spectrum of Compound **29**

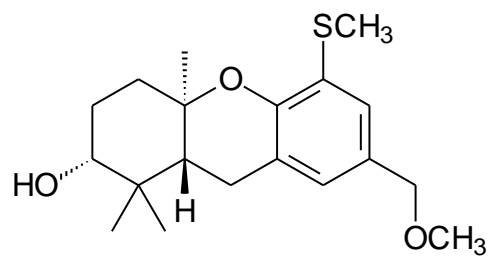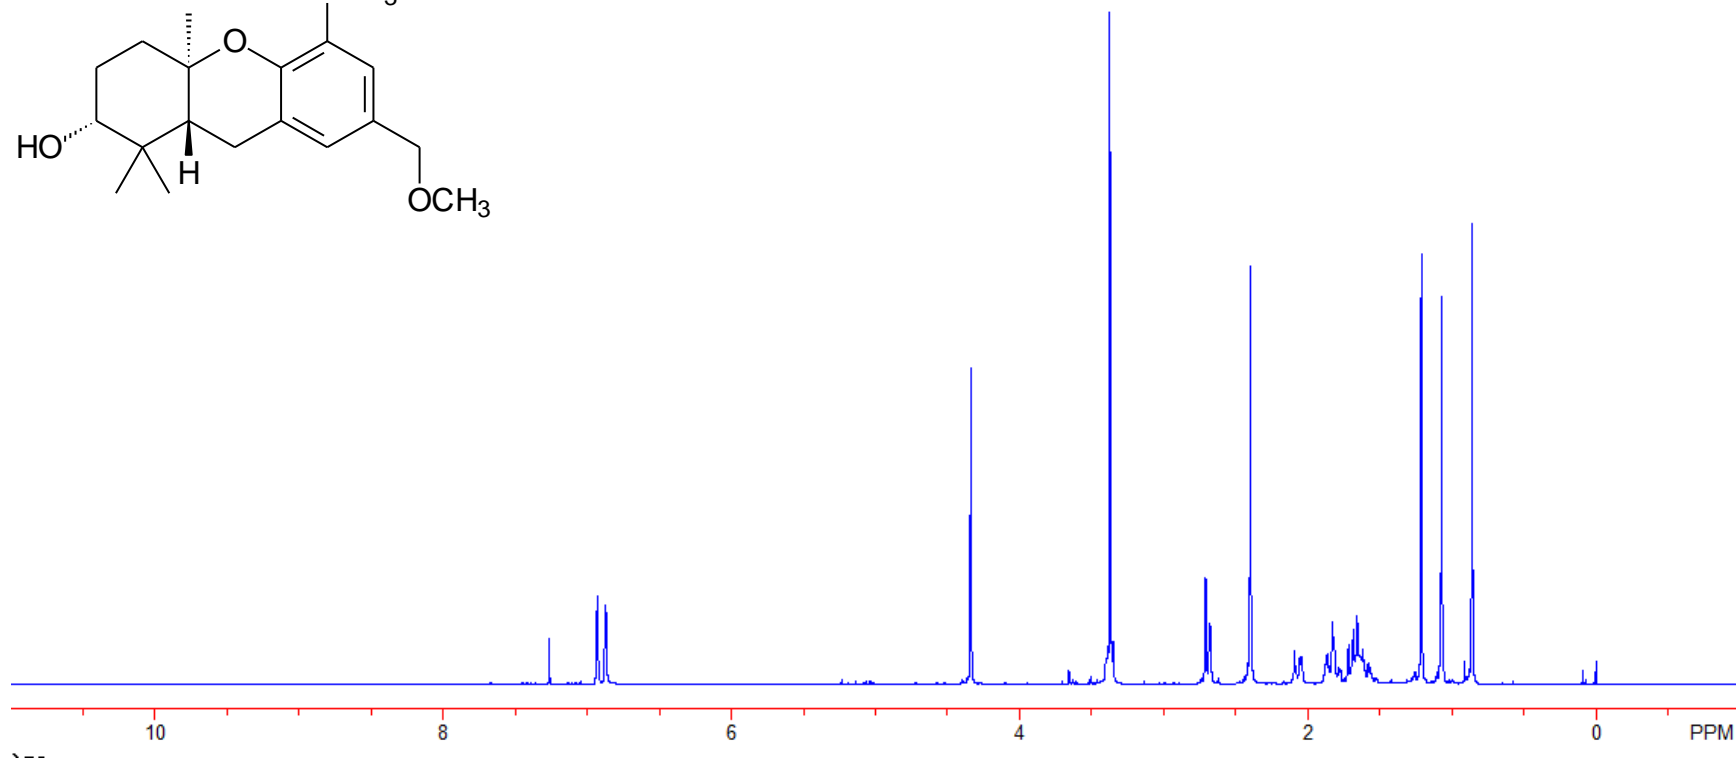

300 MHz <sup>1</sup>H NMR Spectrum of Compound 30

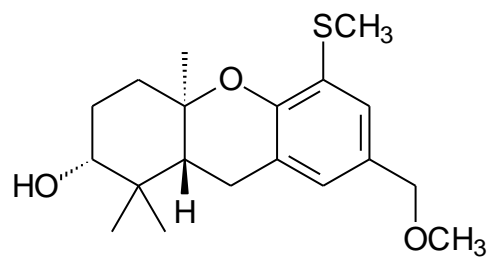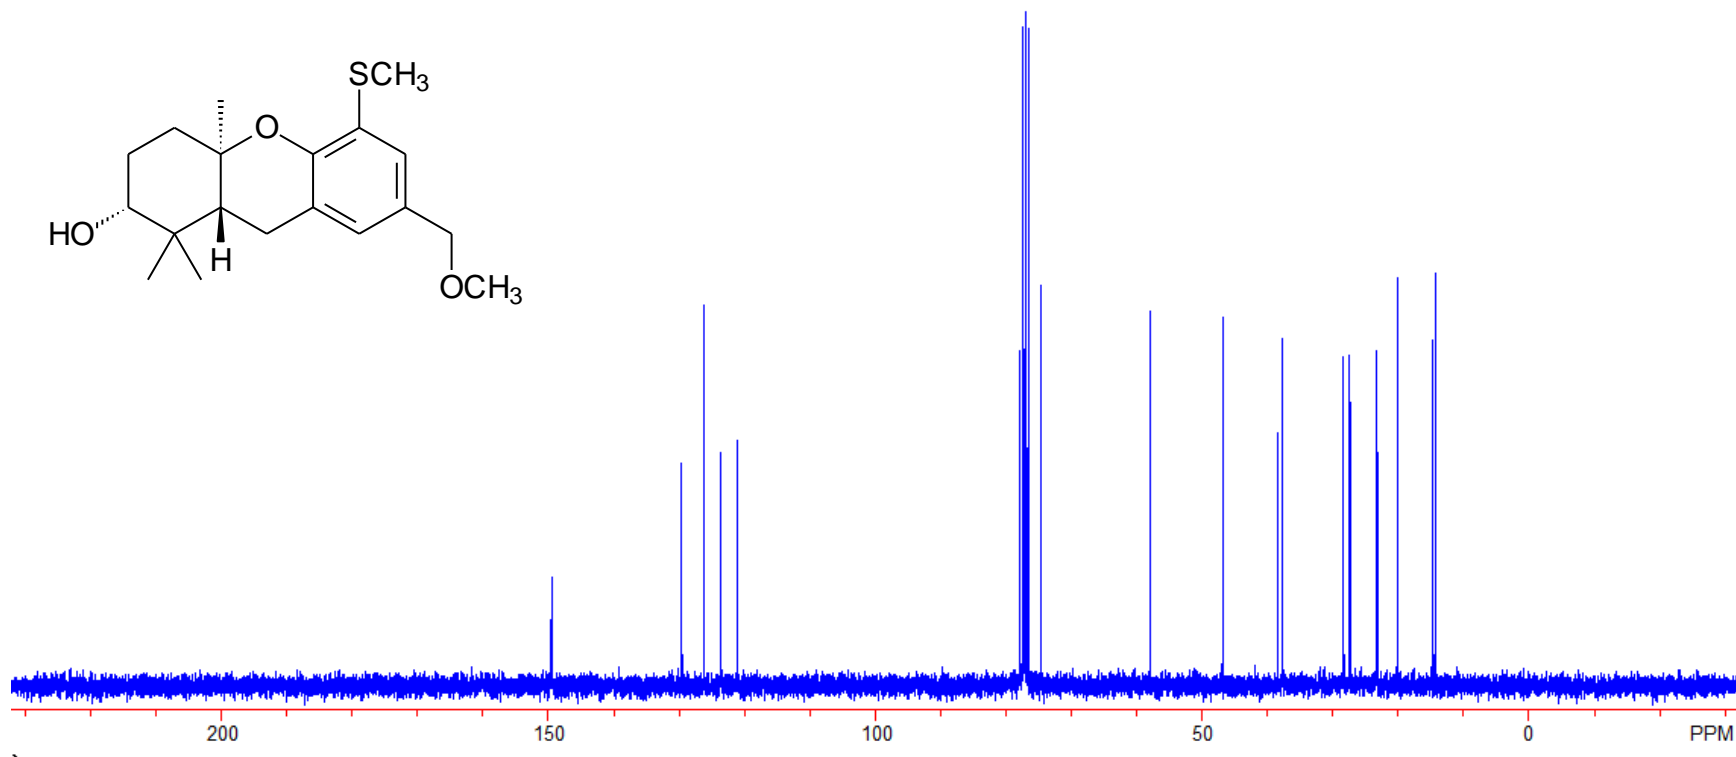

75 MHz <sup>13</sup>C NMR Spectrum of Compound 30

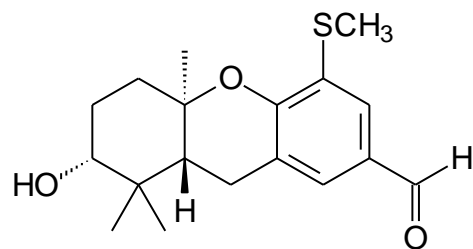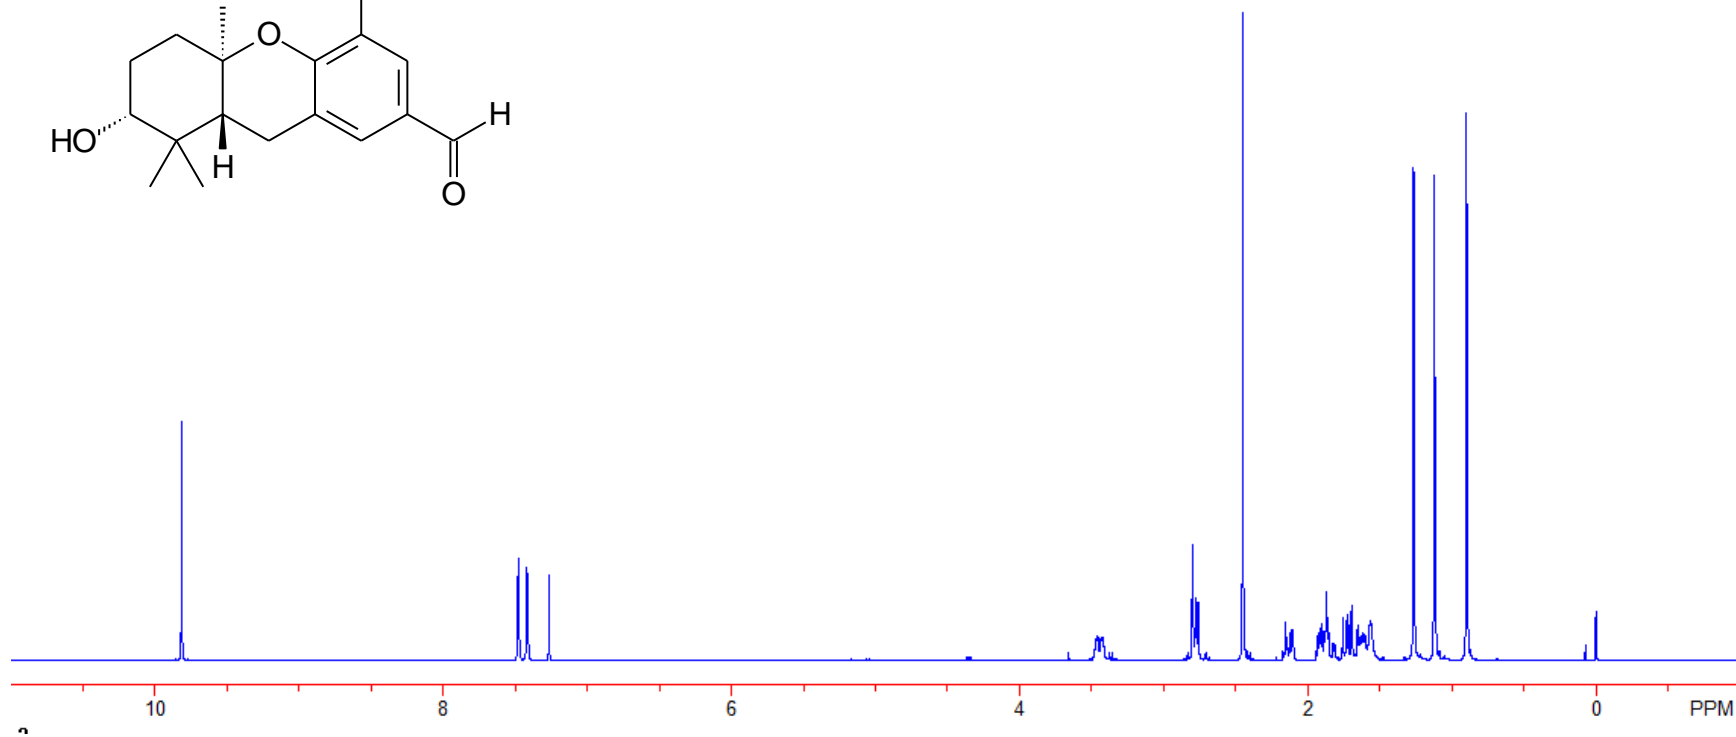

300 MHz <sup>1</sup>H NMR Spectrum of Compound **31**

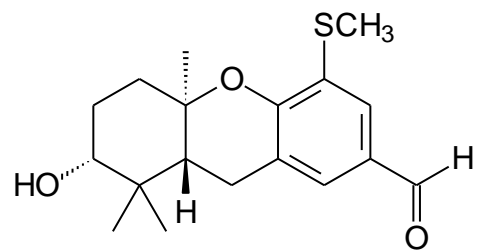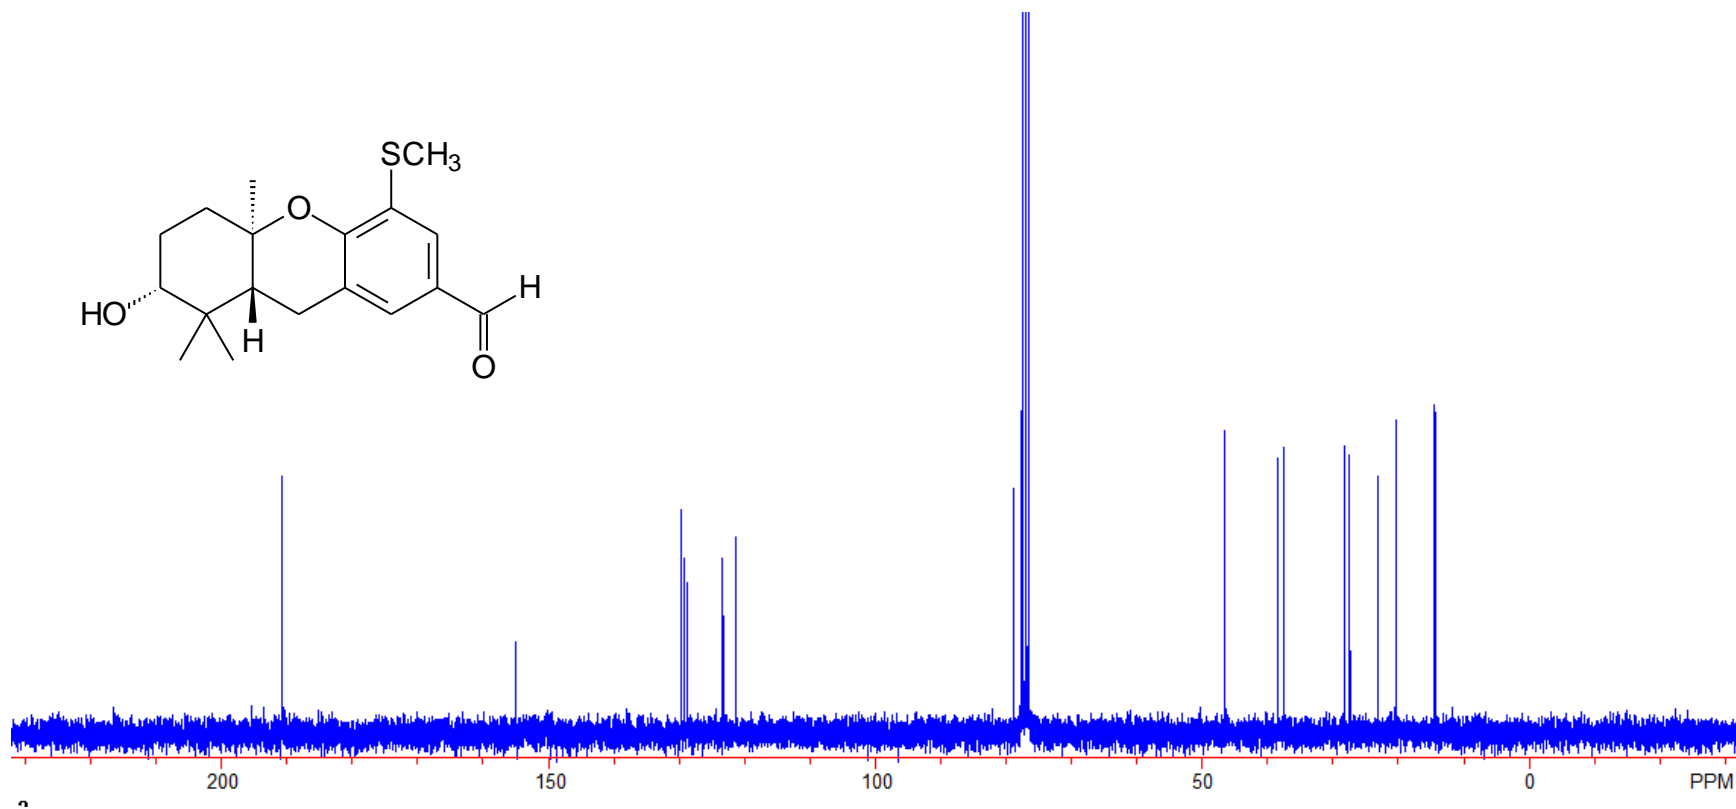

75 MHz <sup>13</sup>C NMR Spectrum of Compound 31

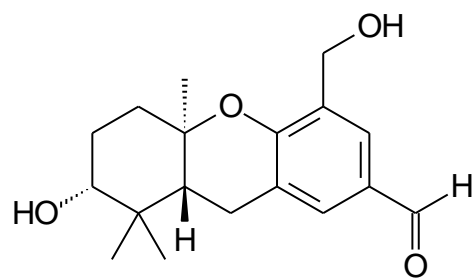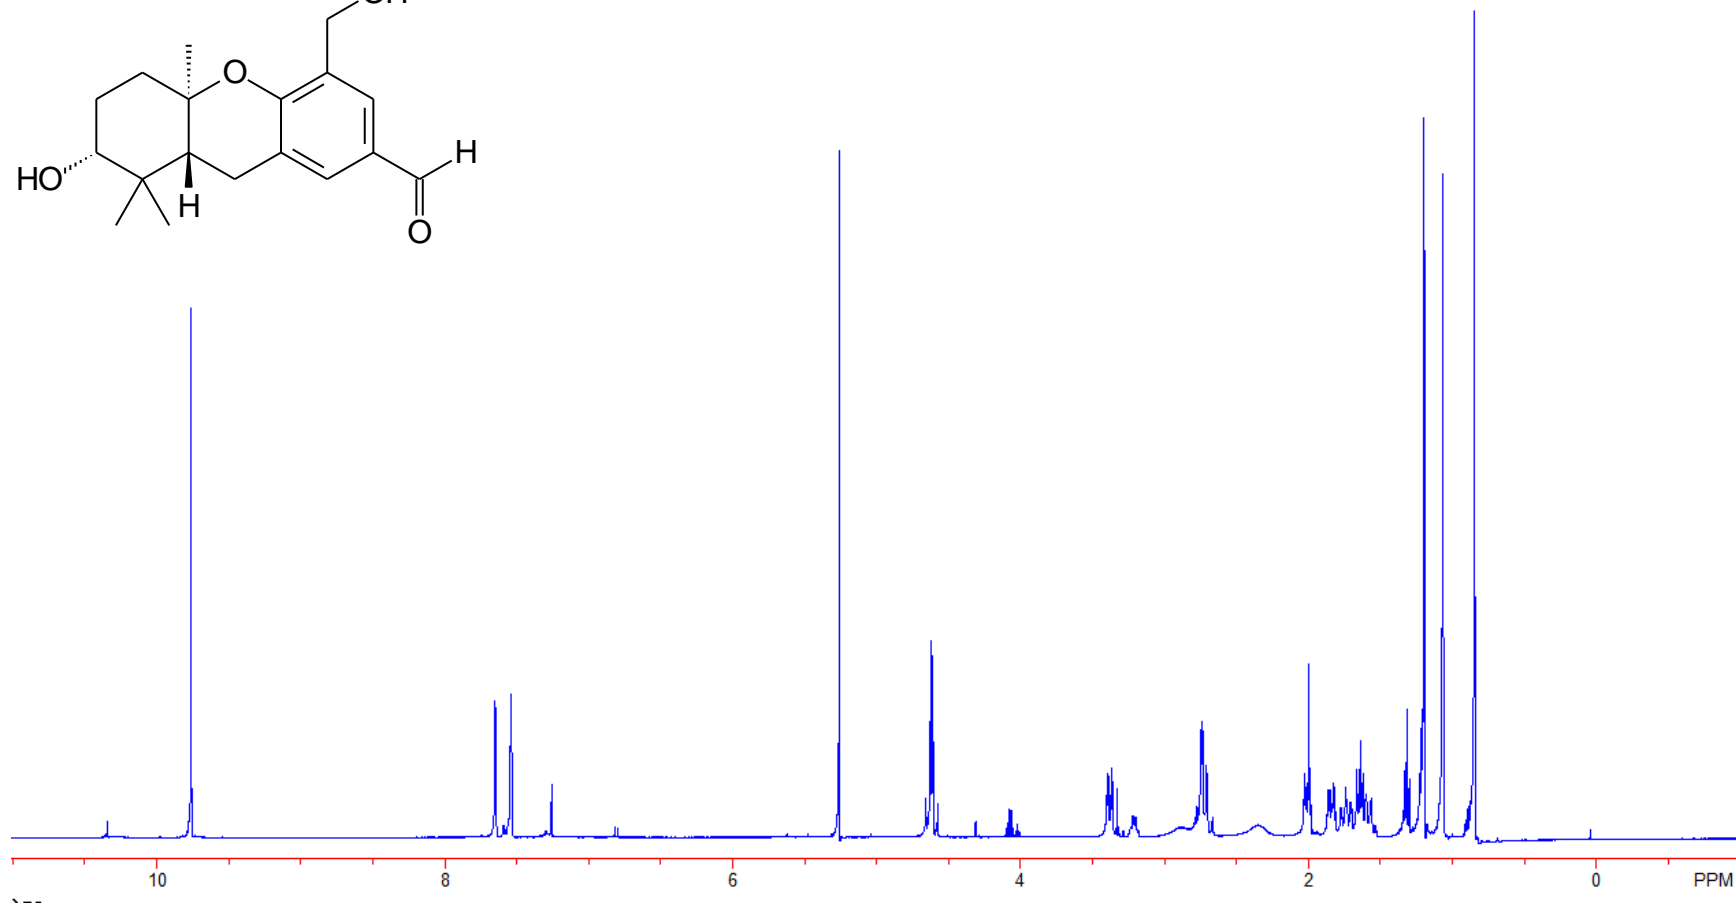

400 MHz <sup>1</sup>H NMR Spectrum of Compound 33



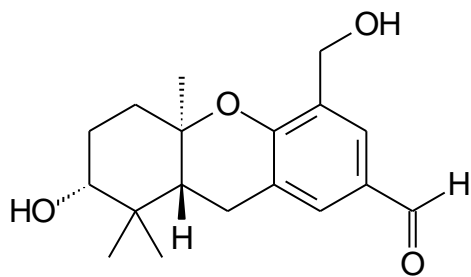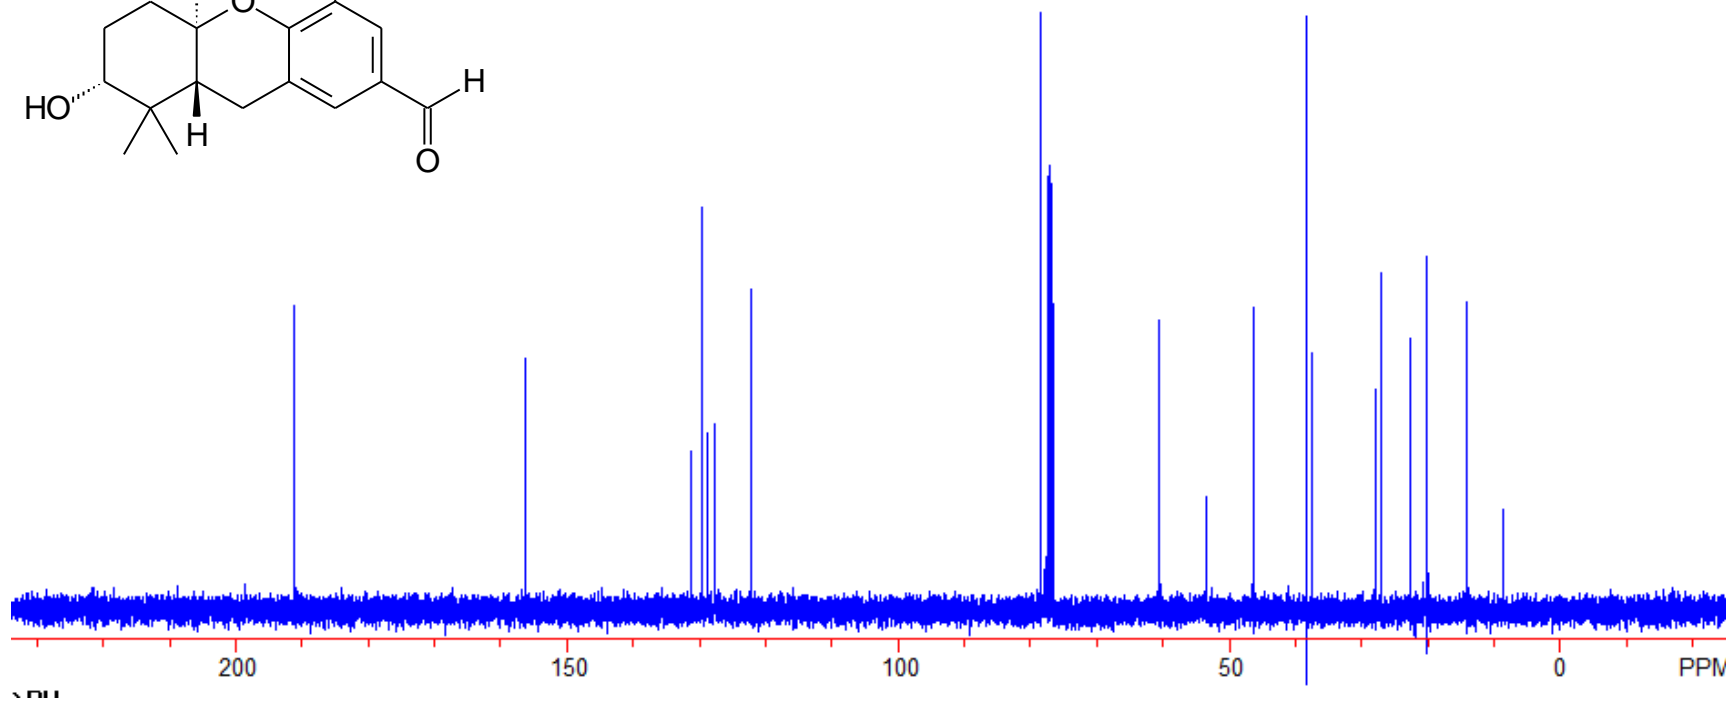

100 MHz <sup>13</sup>C NMR Spectrum of Compound 33

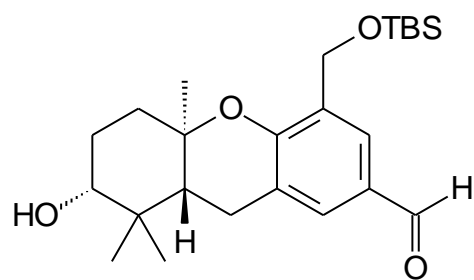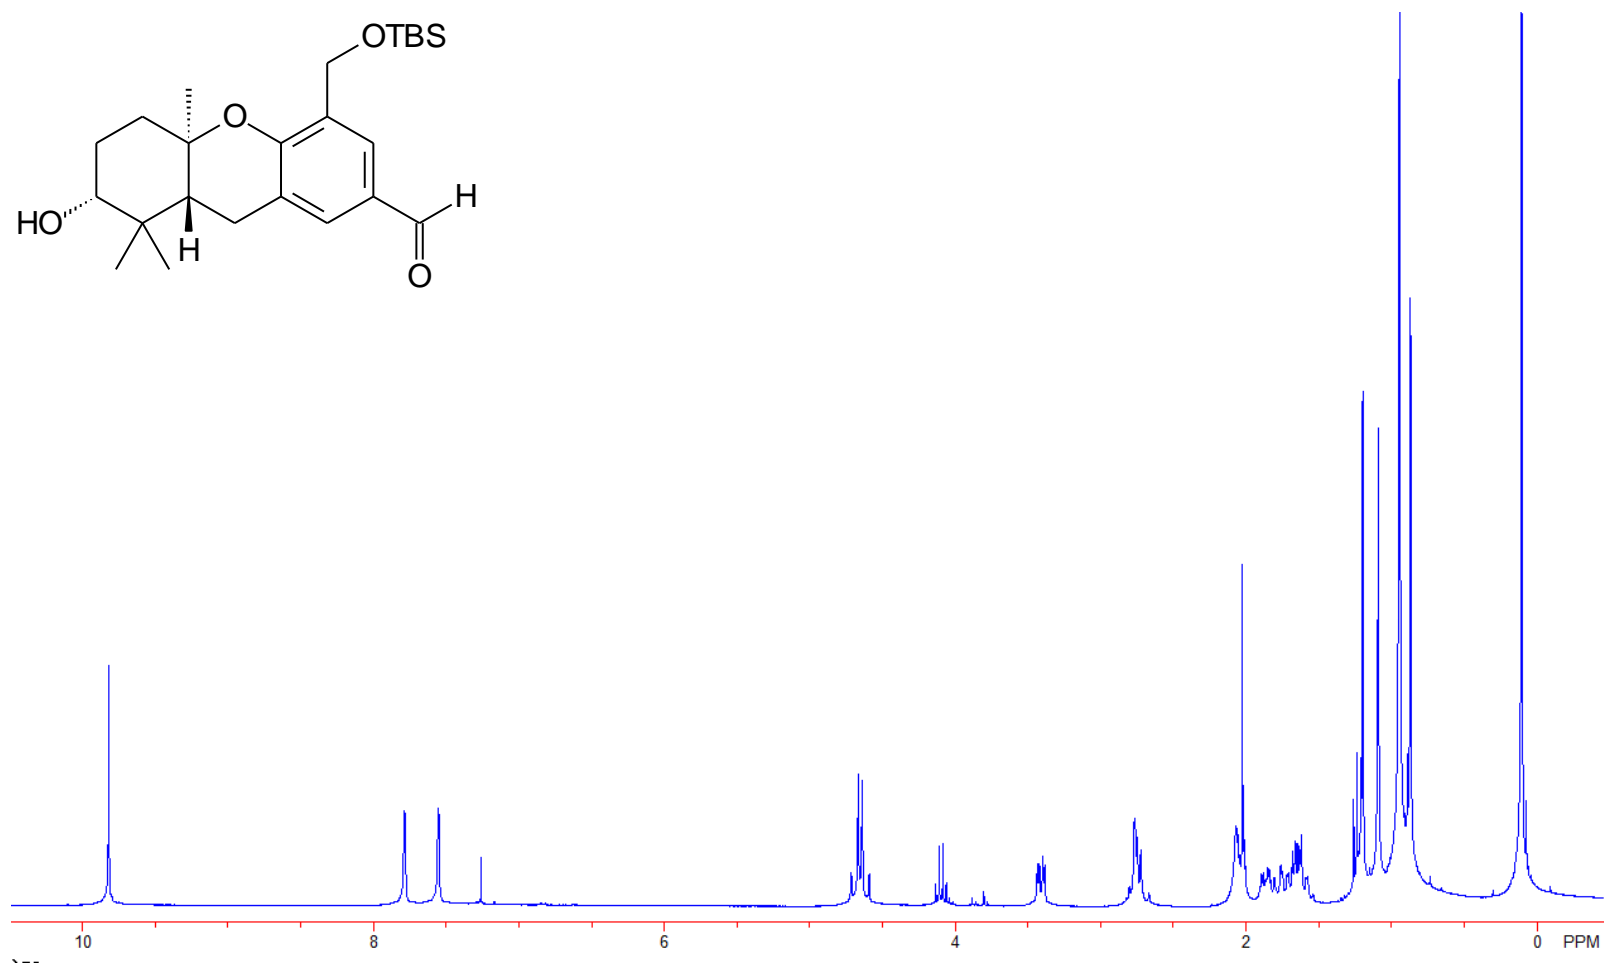

400 MHz <sup>1</sup>H NMR Spectrum of Compound 34

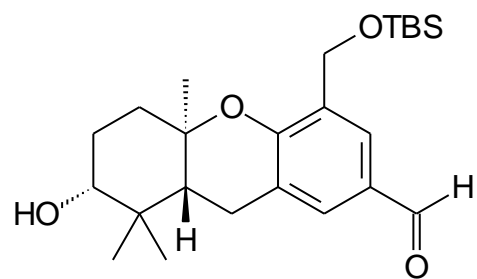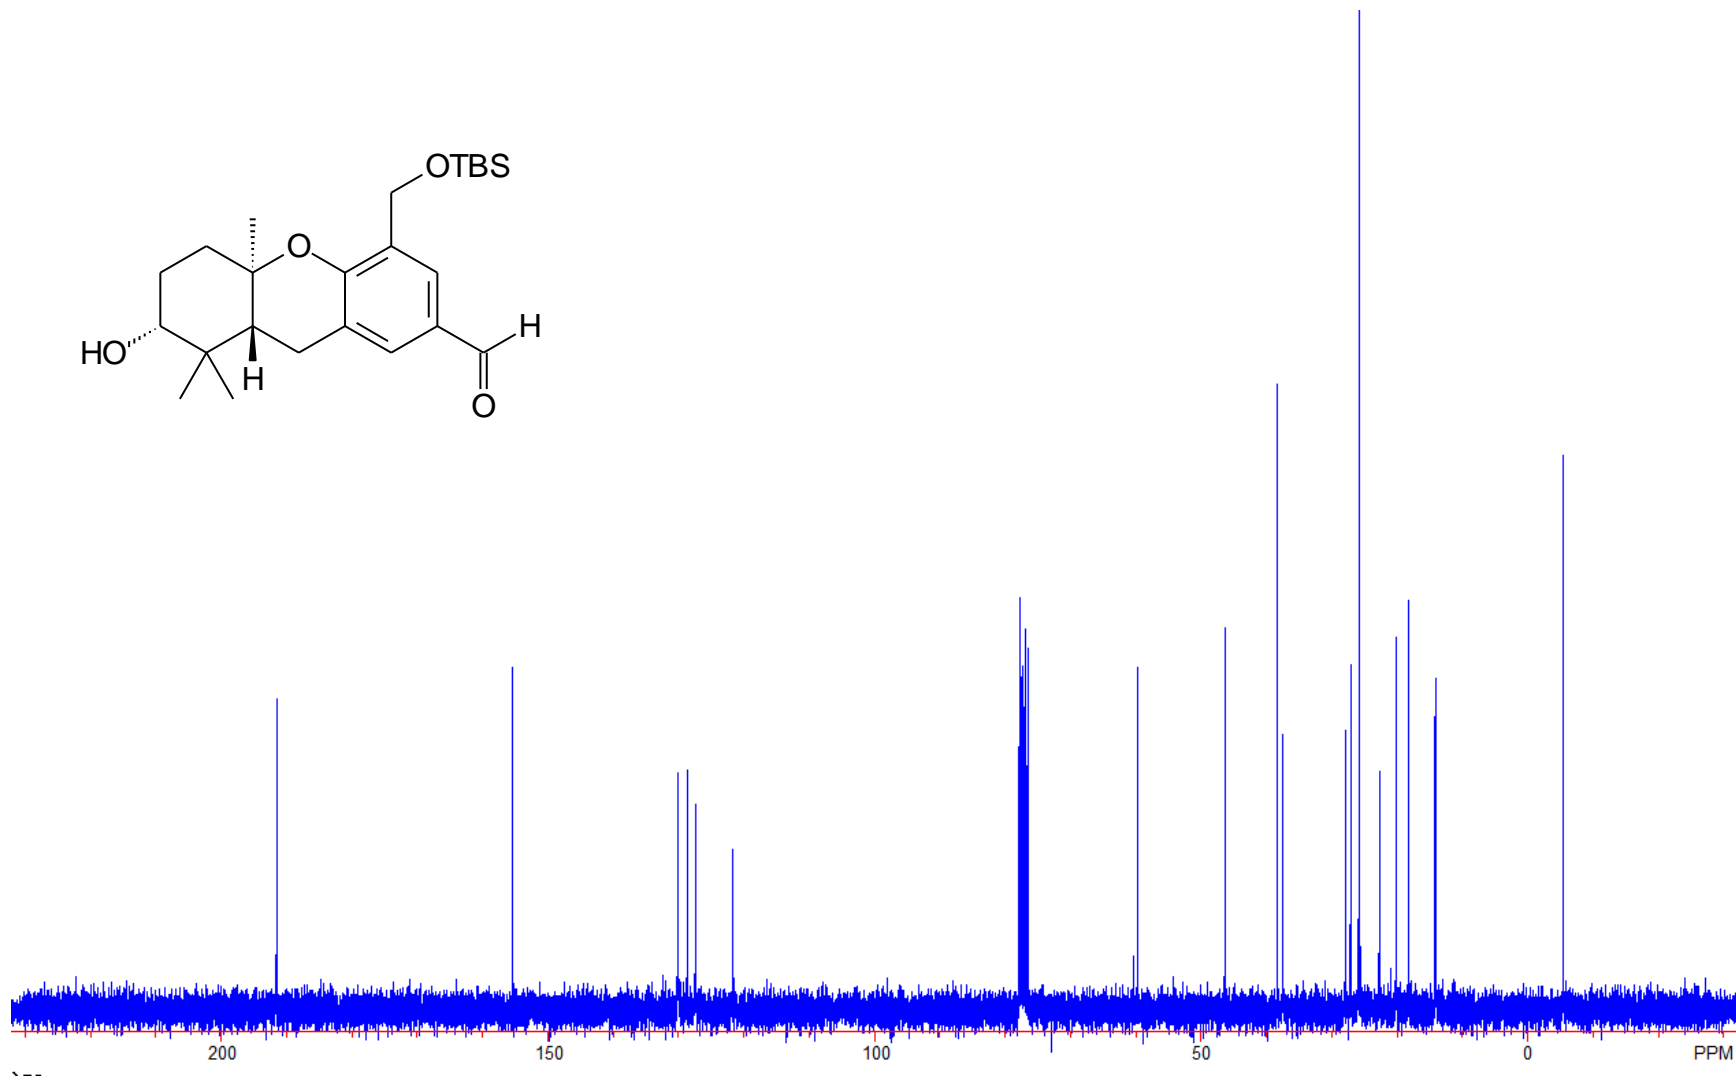

100 MHz <sup>13</sup>C NMR Spectrum of Compound 34

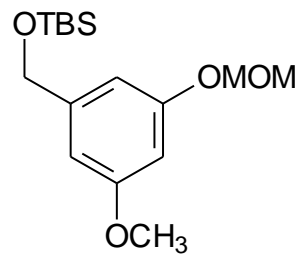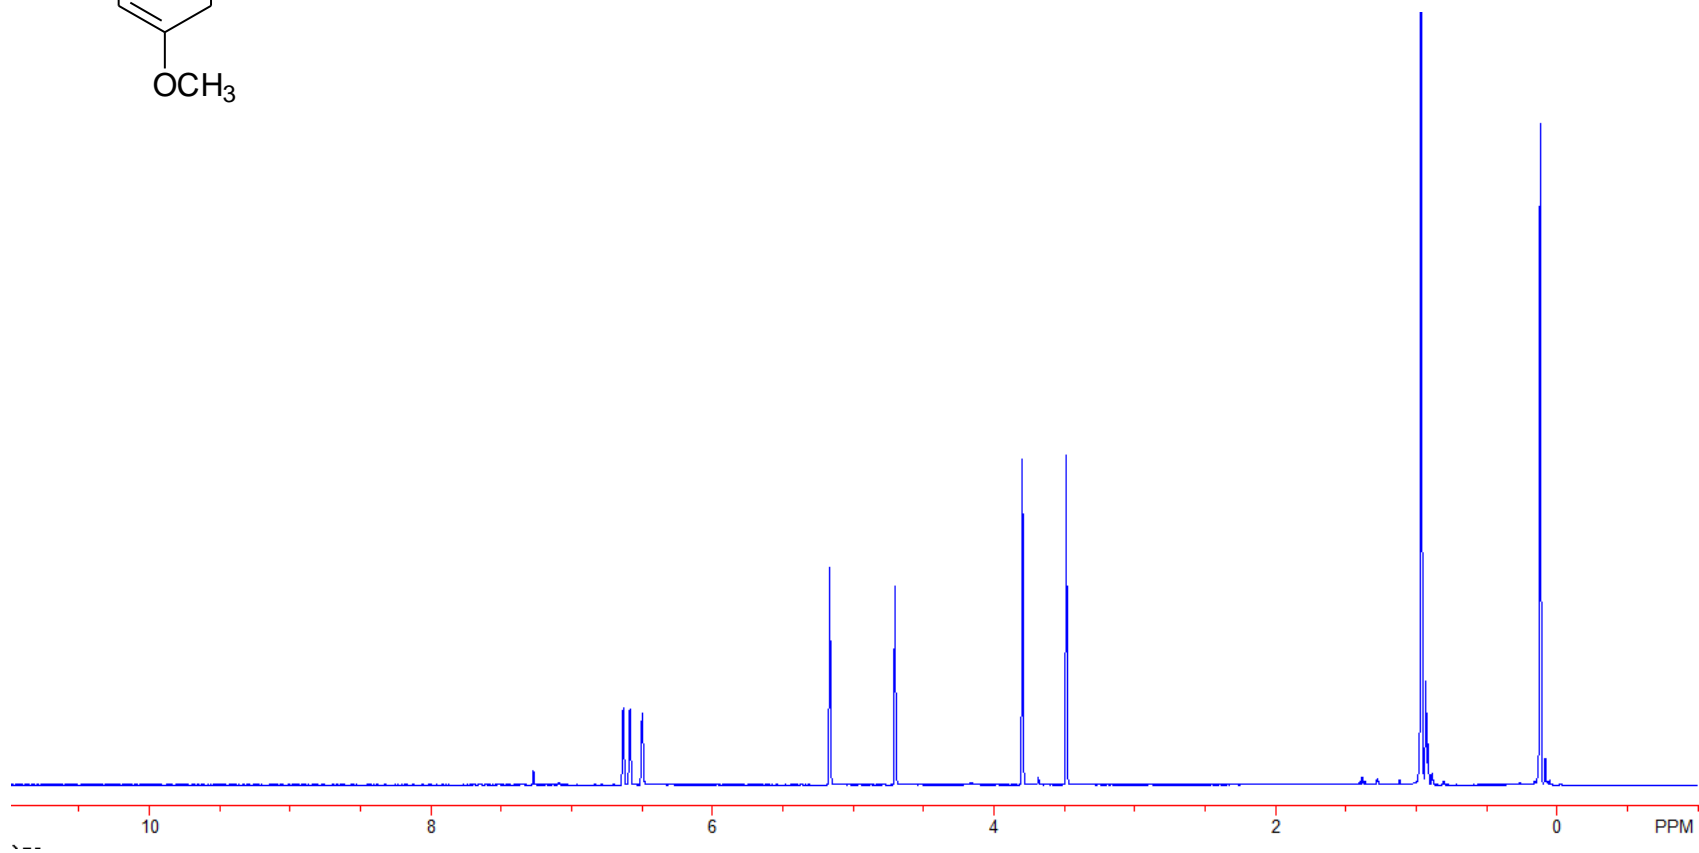

400 MHz <sup>1</sup>H NMR Spectrum of Compound 36



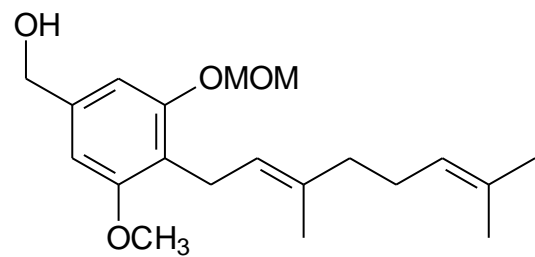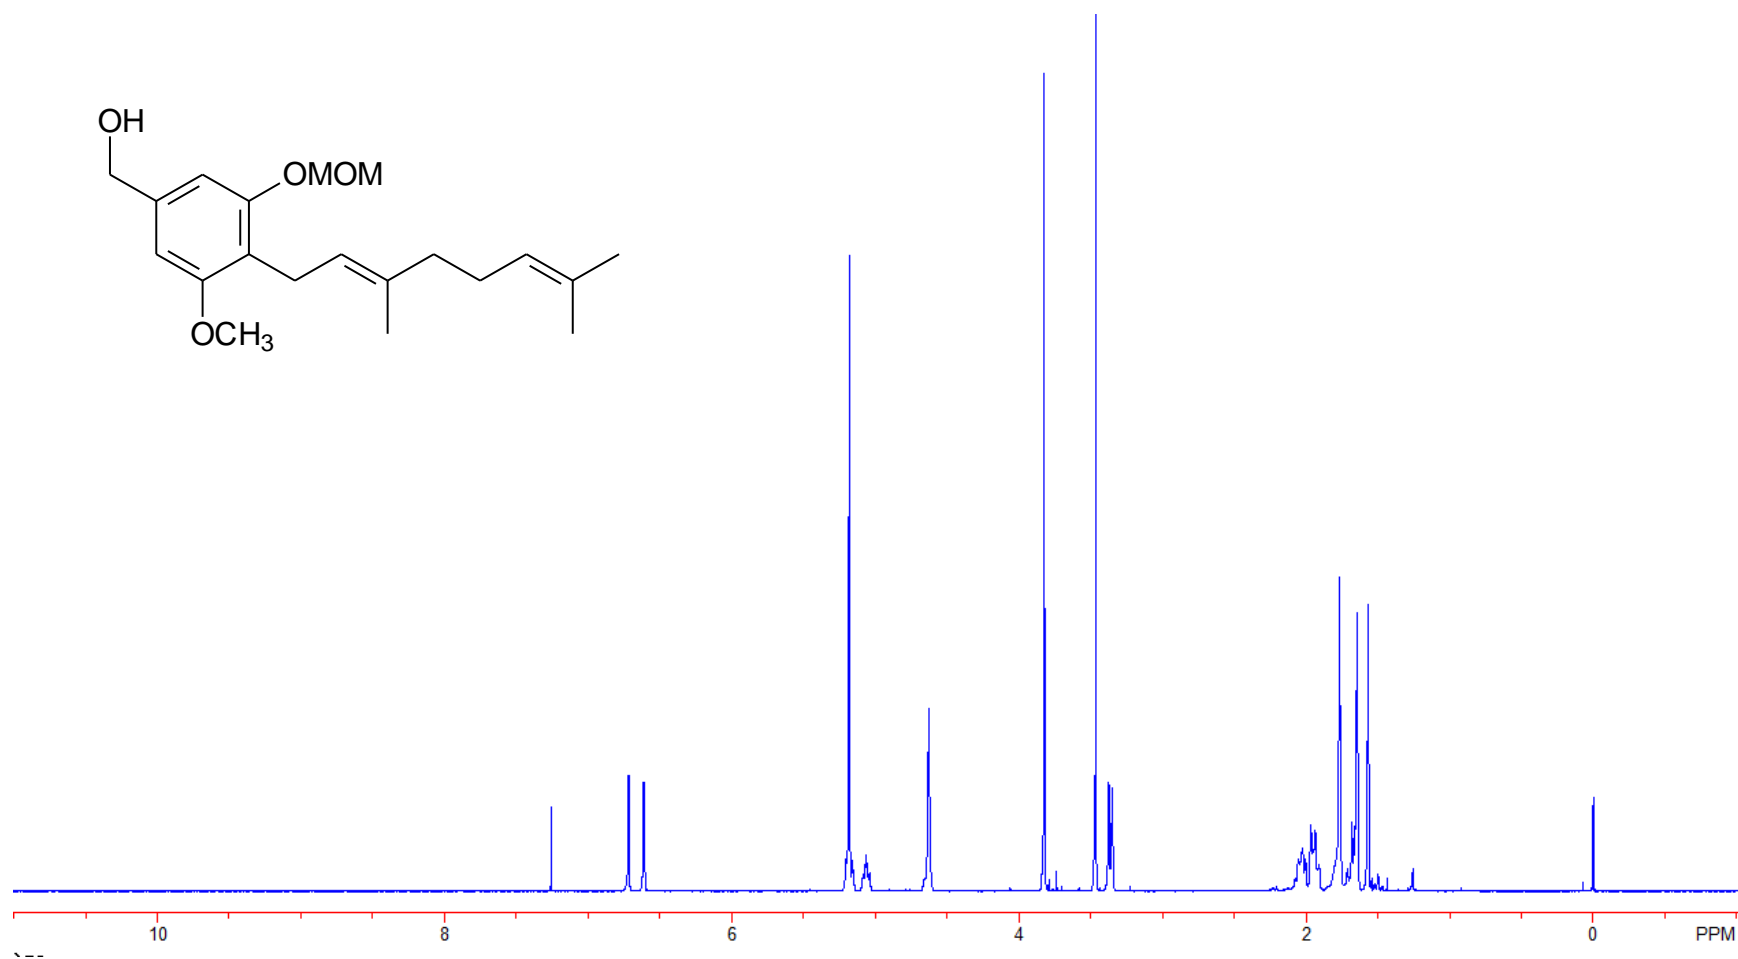

300 MHz <sup>1</sup>H NMR Spectrum of Compound 38

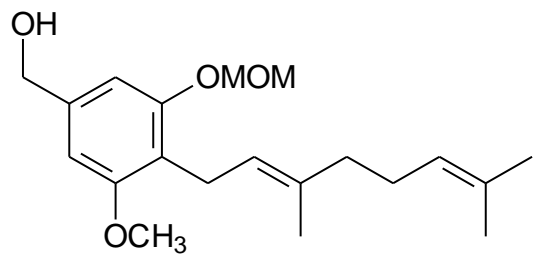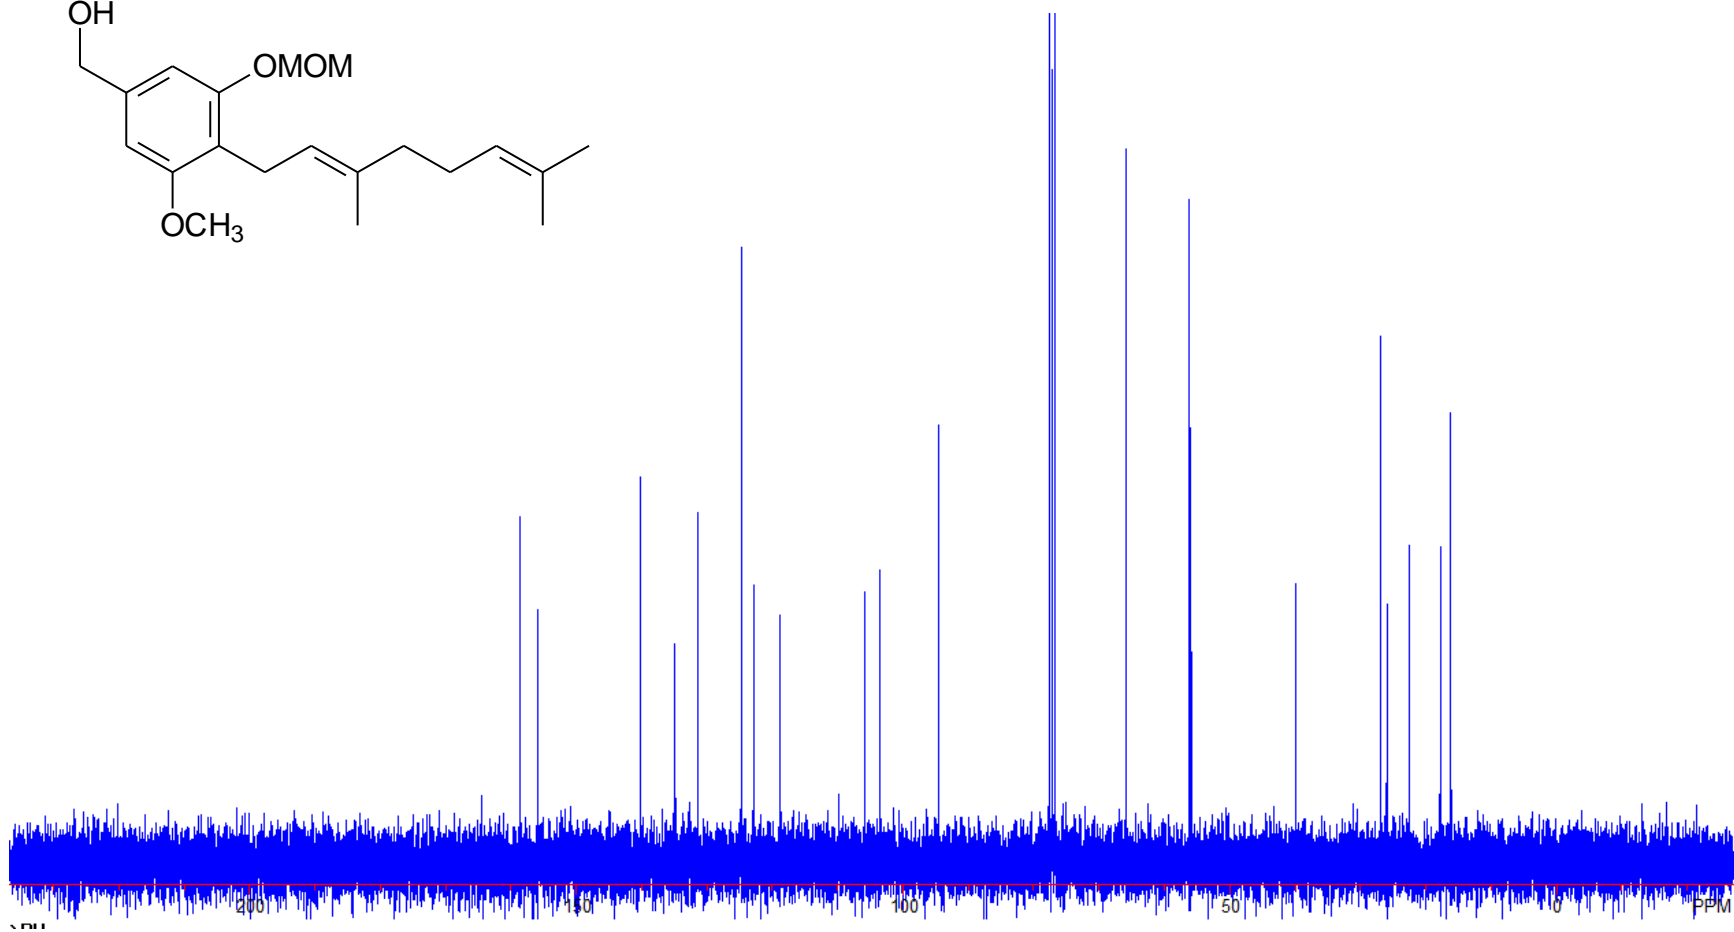

75 MHz <sup>13</sup>C NMR Spectrum of Compound **38**

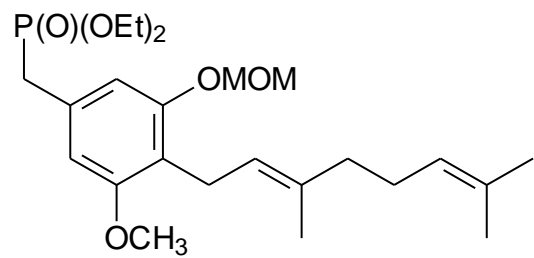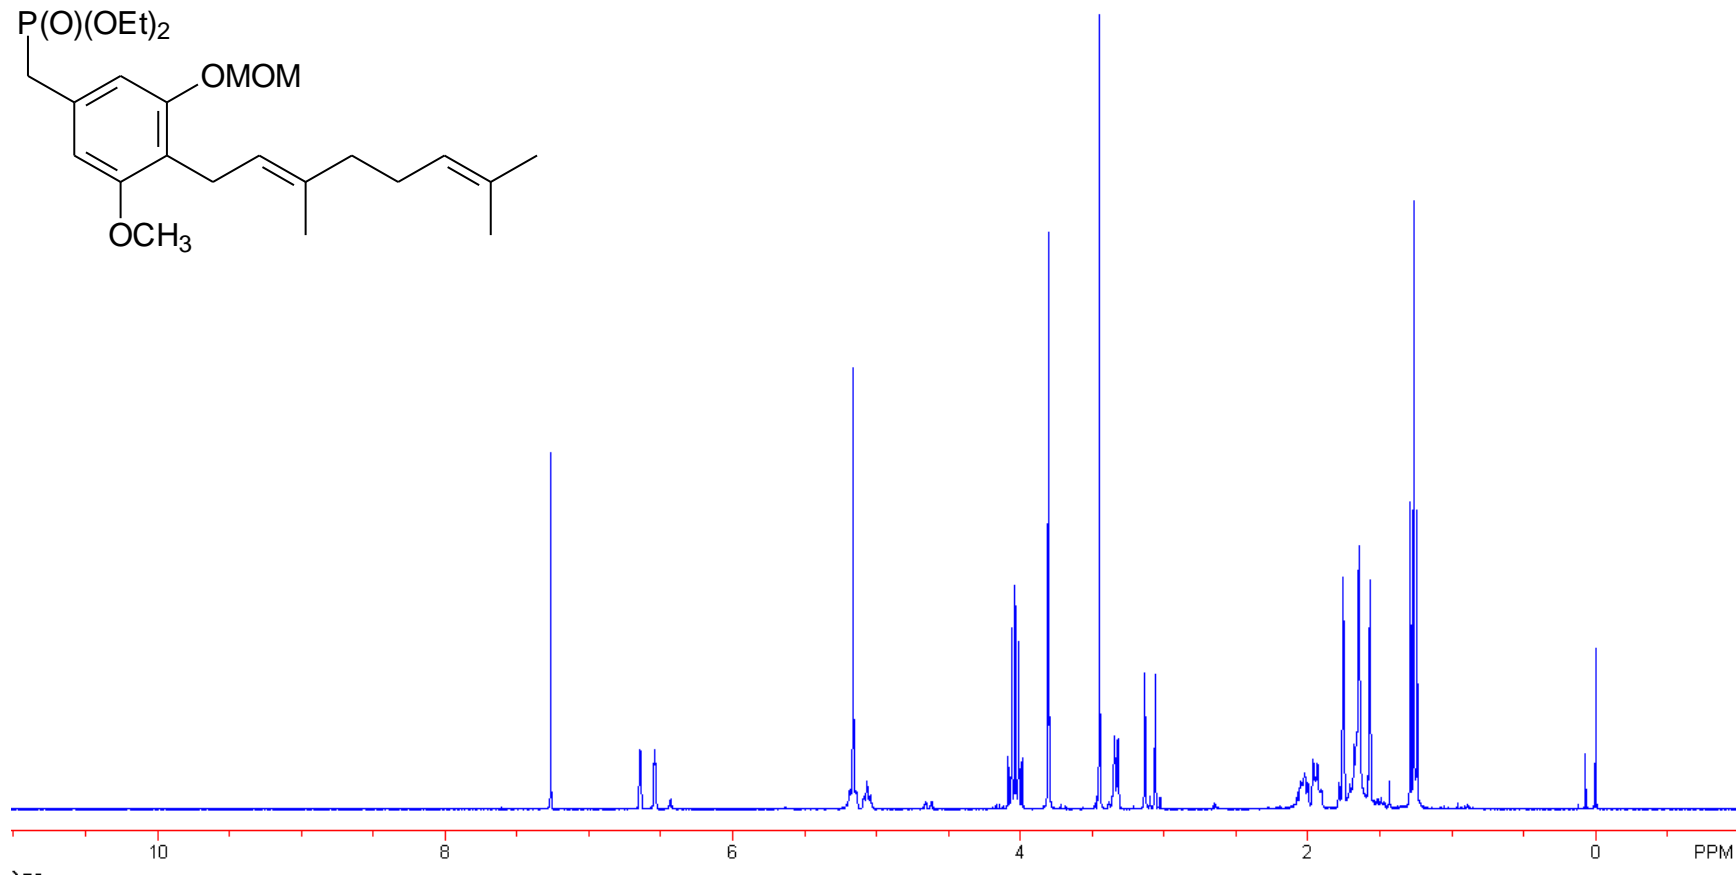

300 MHz <sup>1</sup>H NMR Spectrum of Compound 39



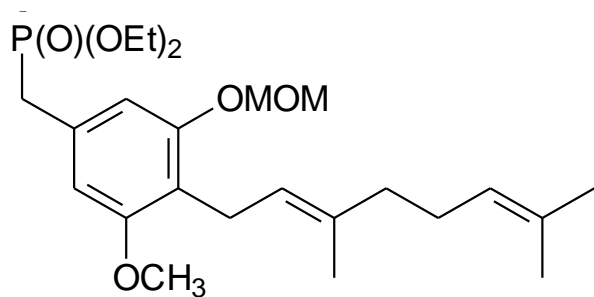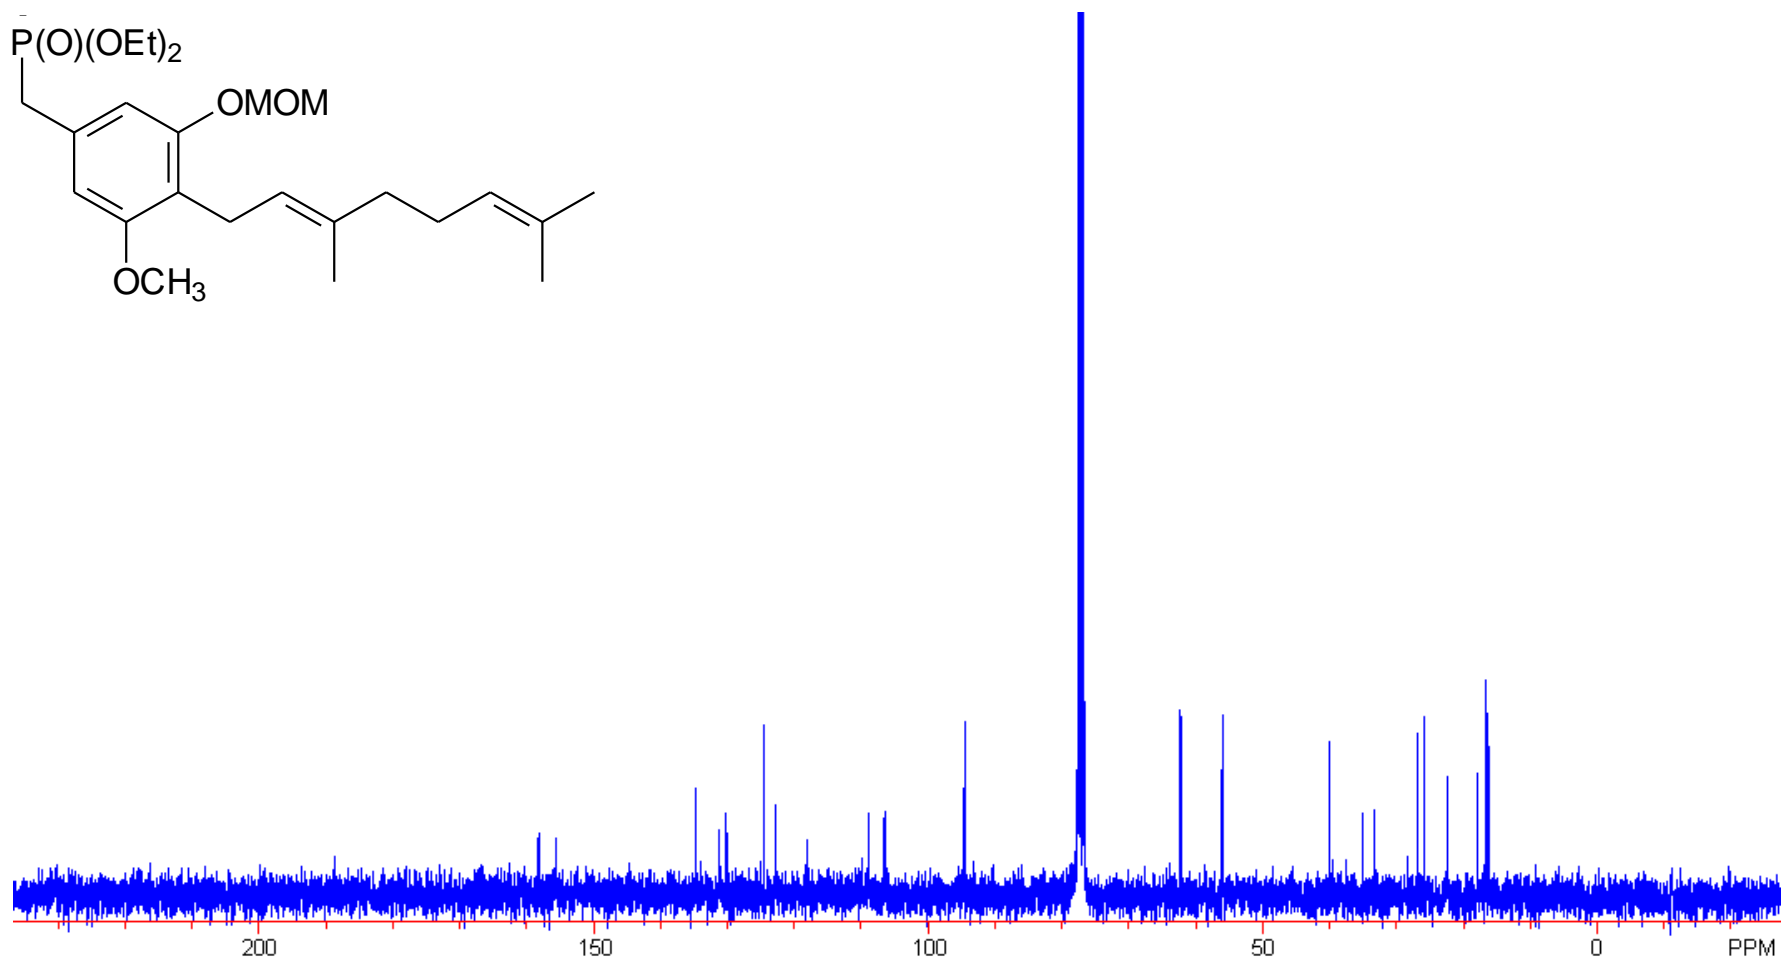

75 MHz  $^{13}\text{C}$  NMR Spectrum of Compound 39

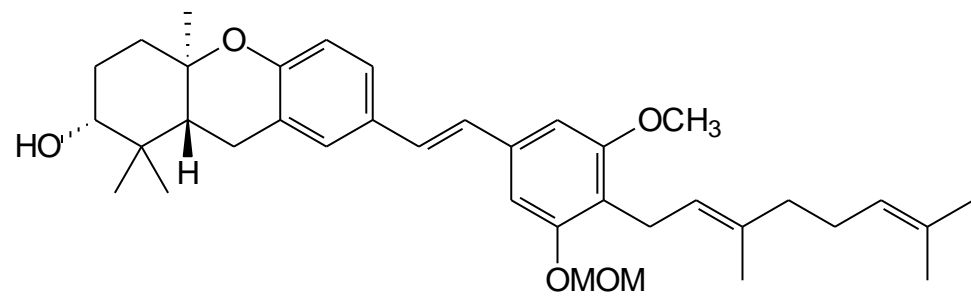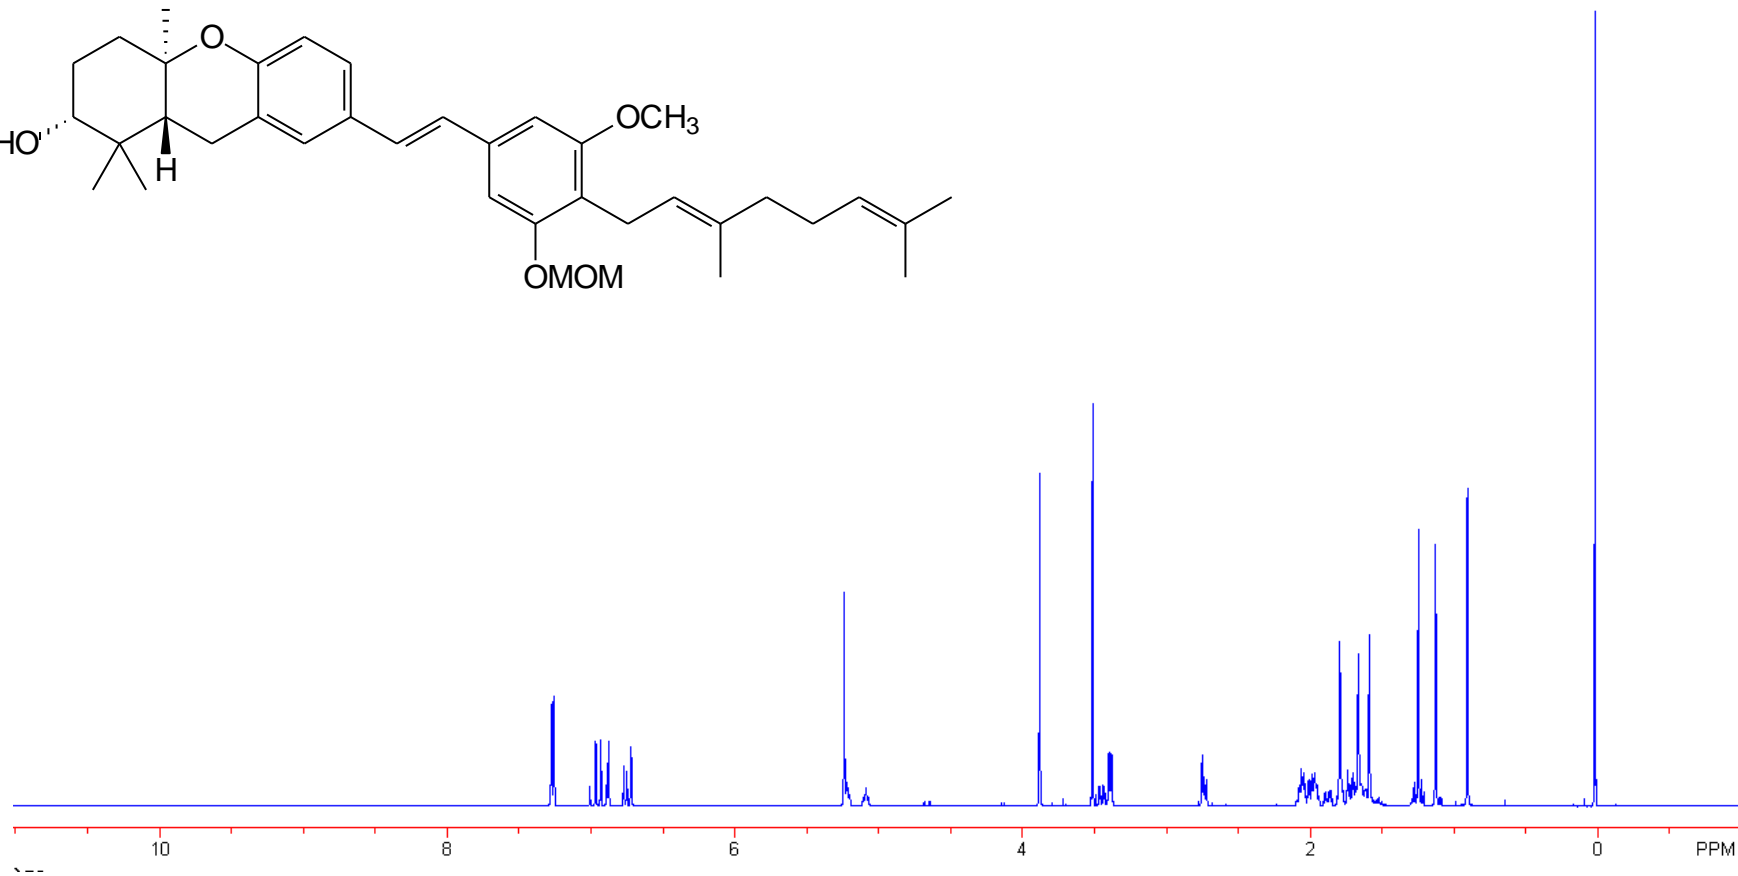

400 MHz <sup>1</sup>H NMR Spectrum of Compound 43

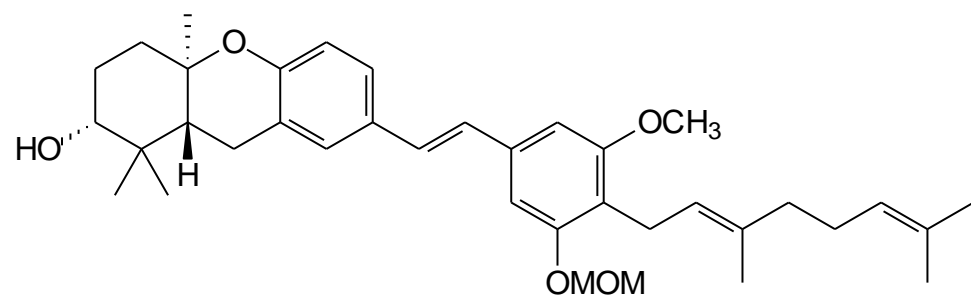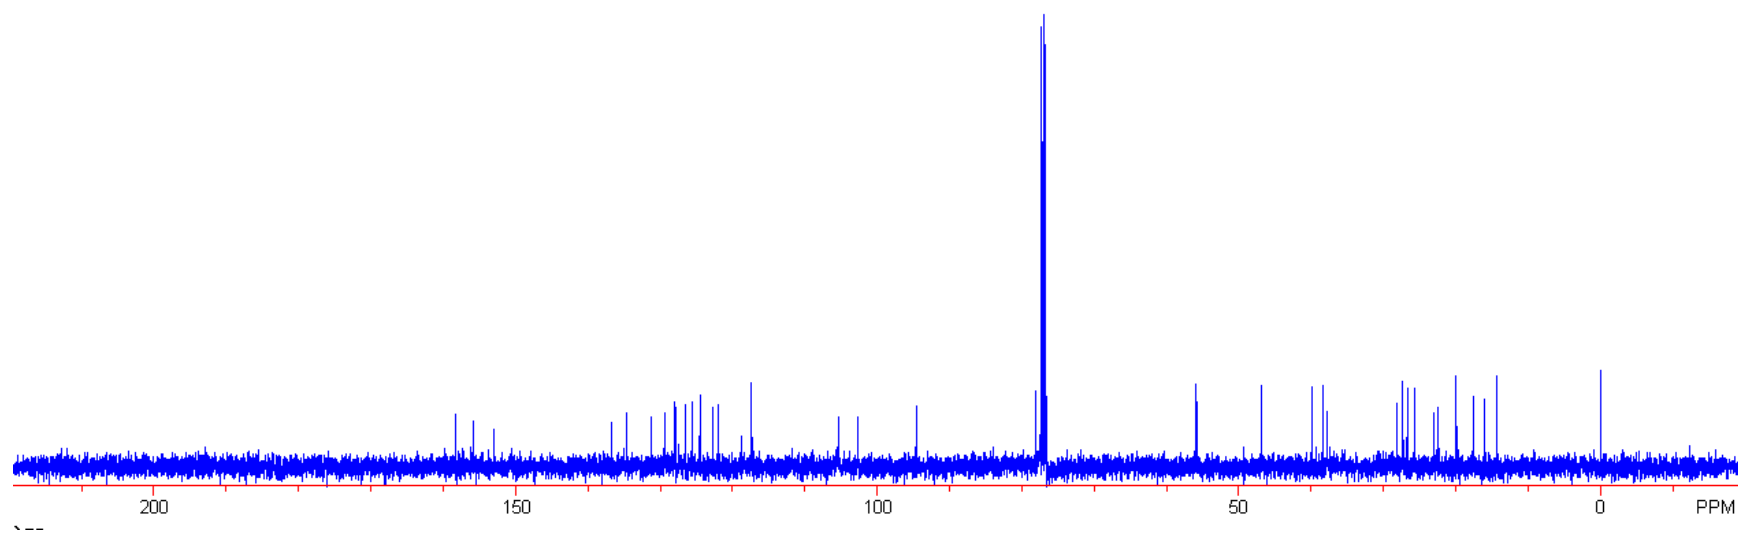

100 MHz <sup>13</sup>C NMR Spectrum of Compound 43

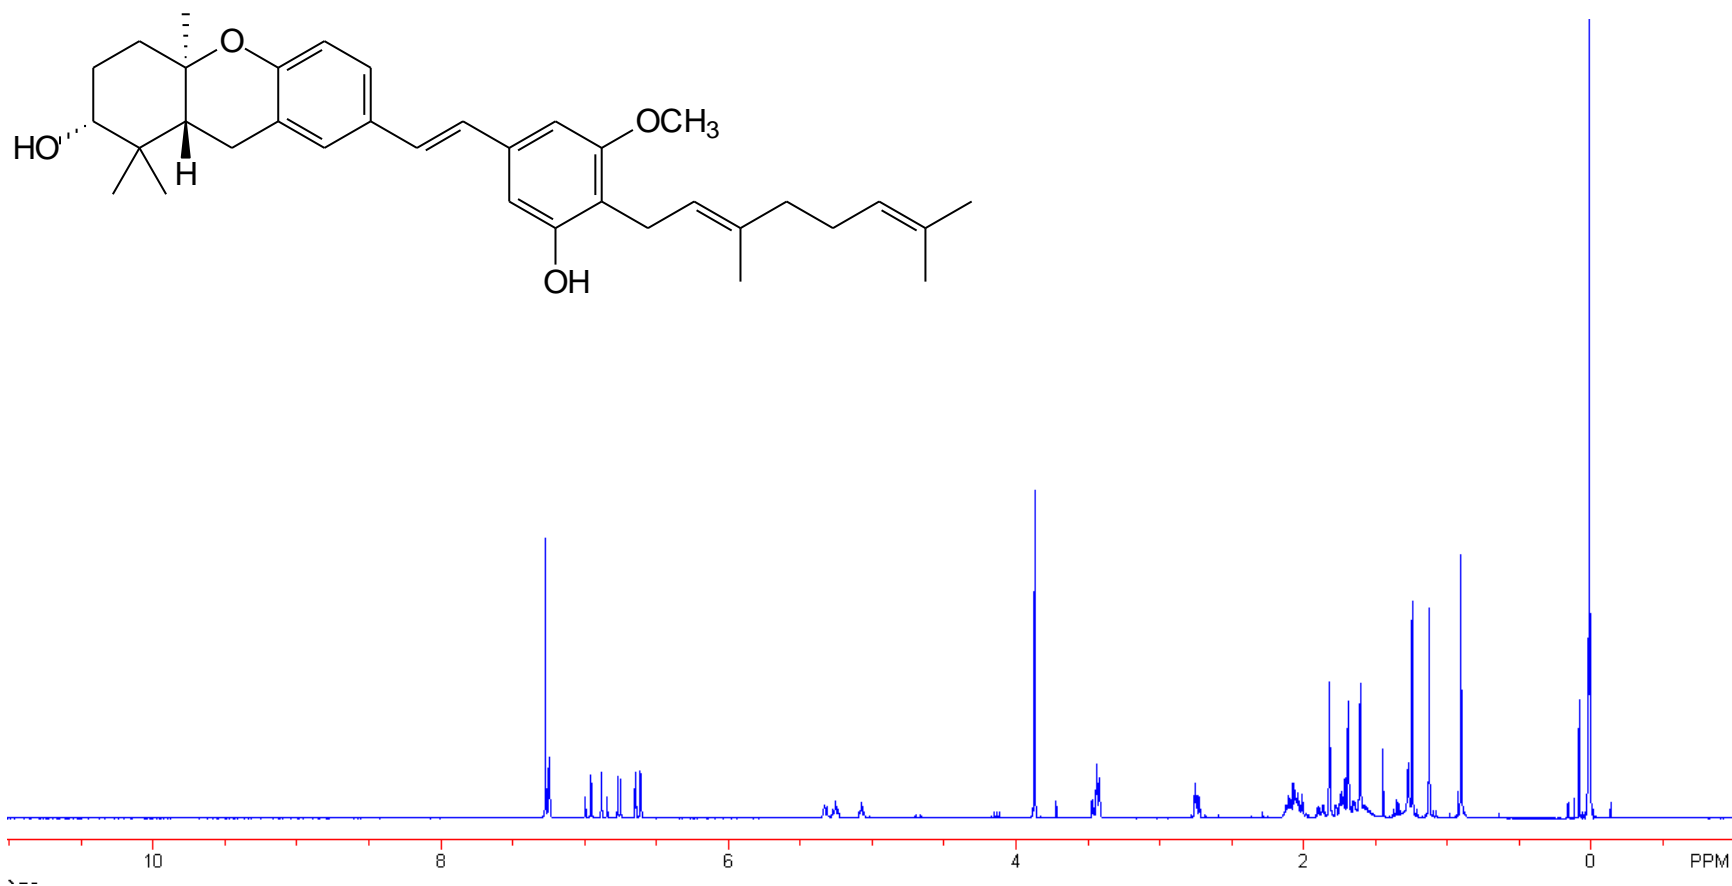

400 MHz <sup>1</sup>H NMR Spectrum of Compound **51**

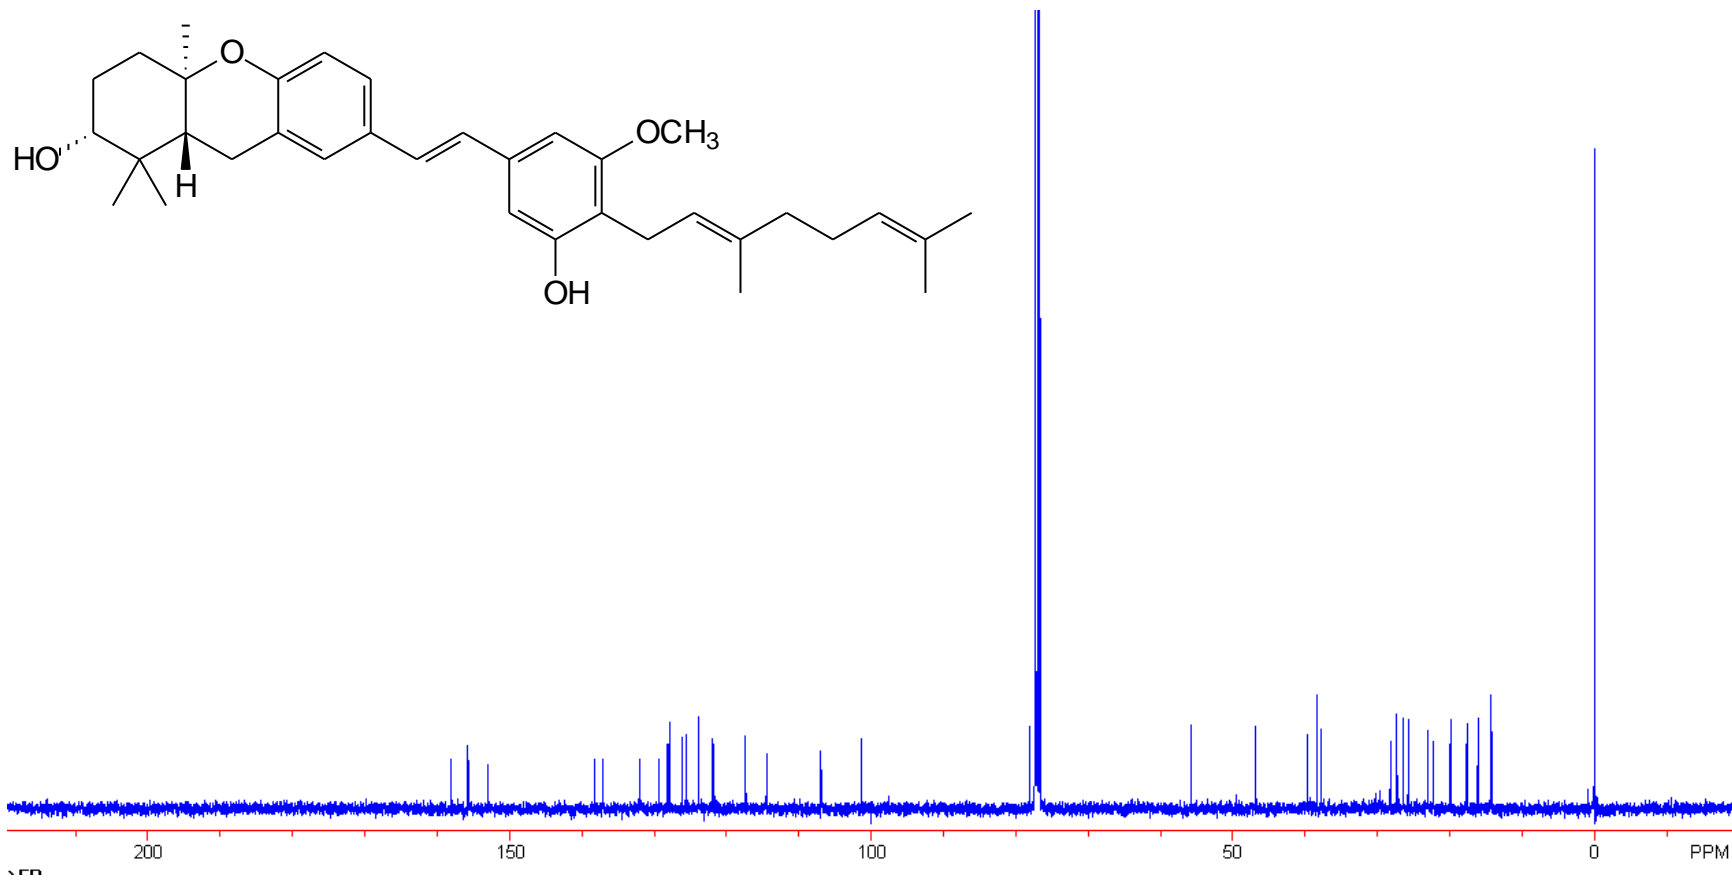

100 MHz  $^{13}\text{C}$  NMR Spectrum of Compound 51

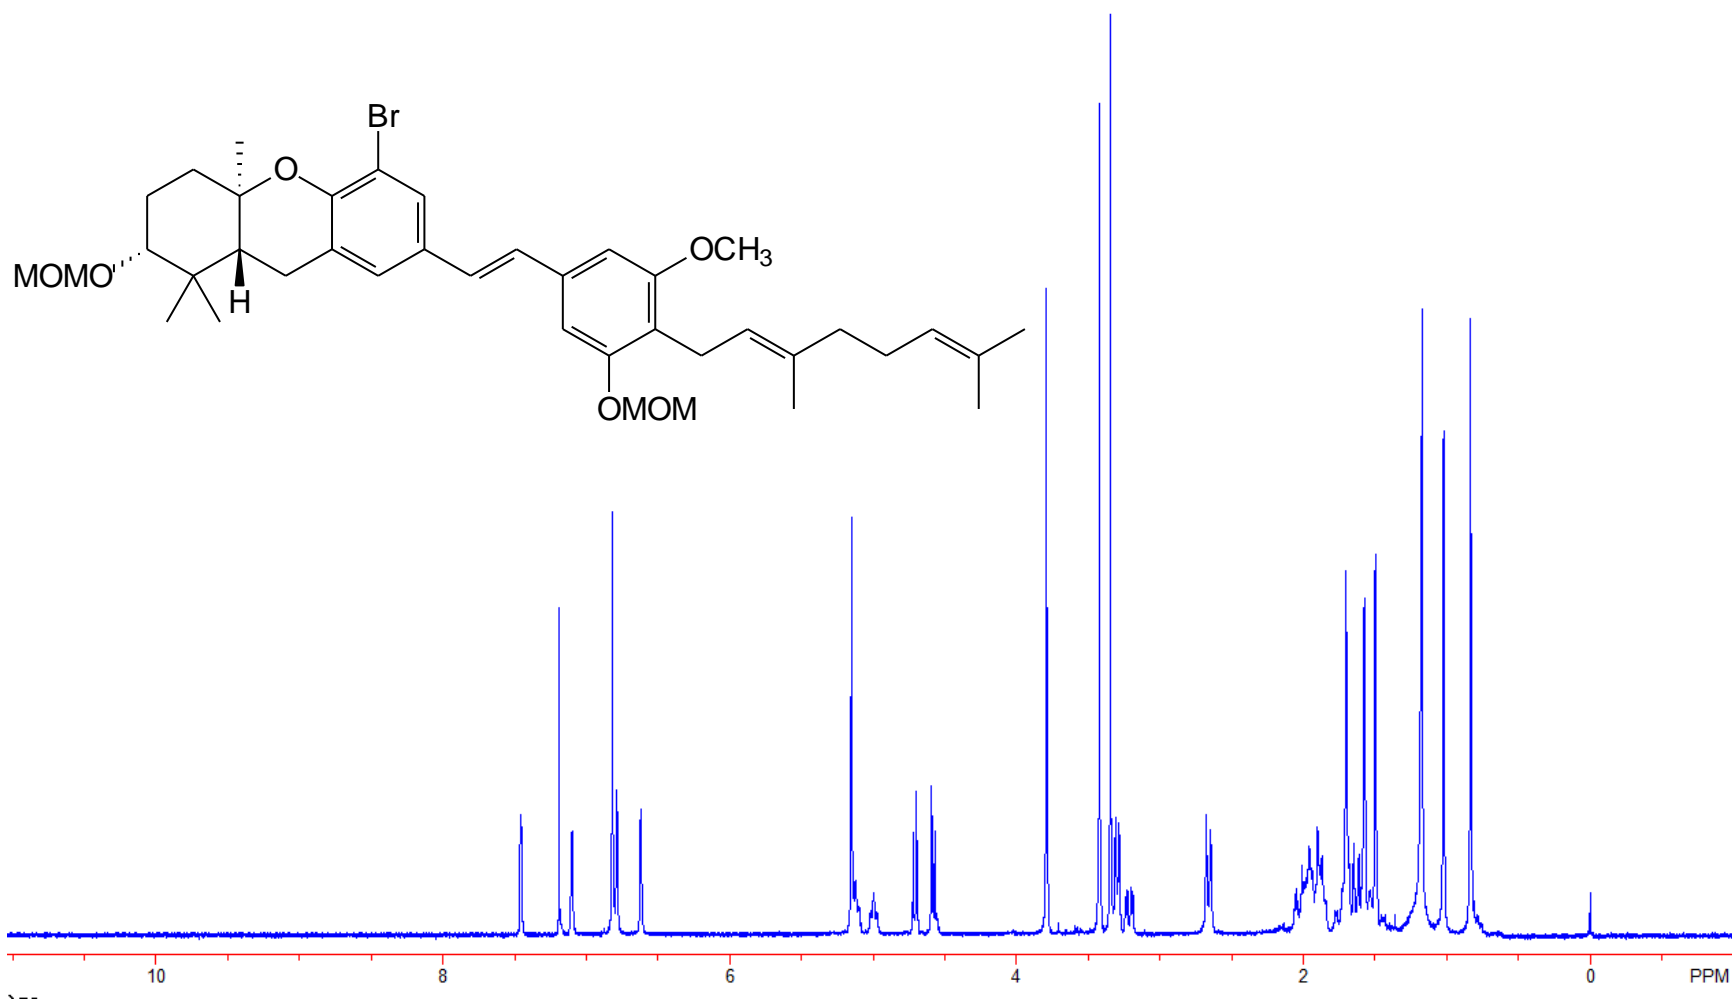

300 MHz <sup>1</sup>H NMR Spectrum of Compound 44

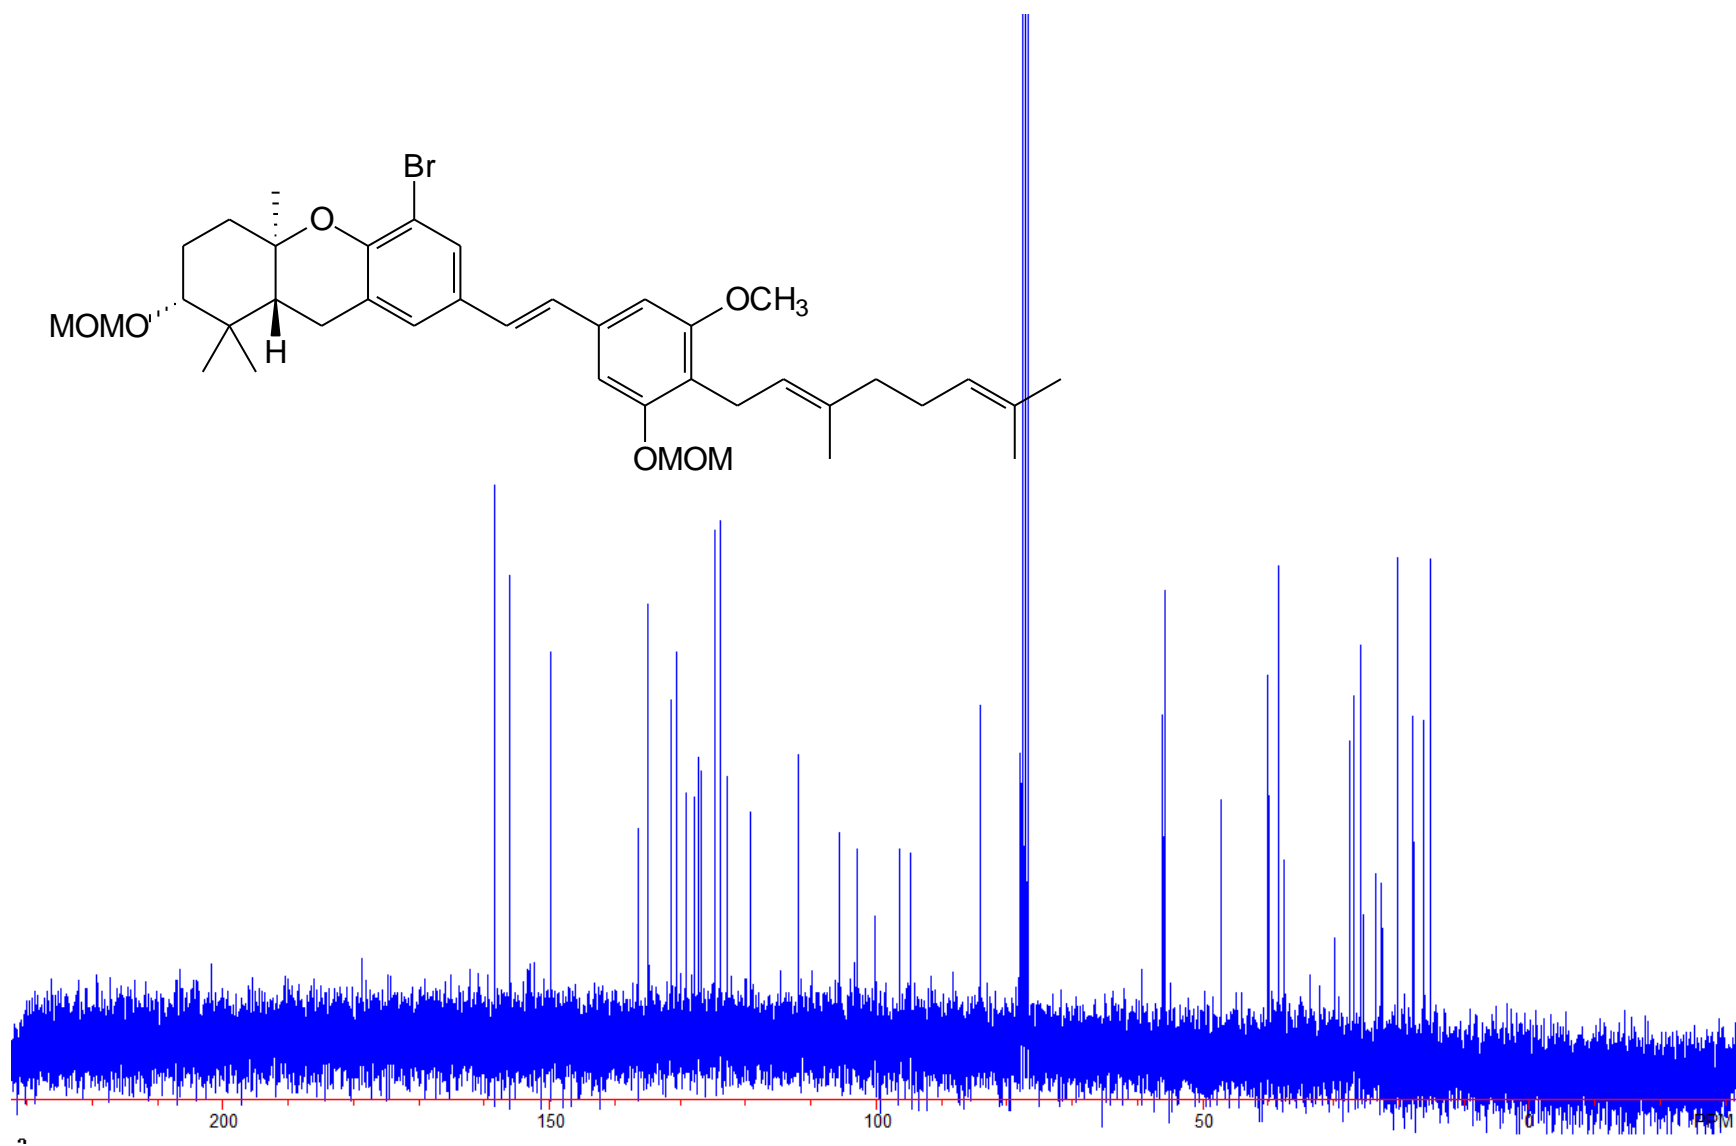

75 MHz <sup>13</sup>C NMR Spectrum of Compound 44

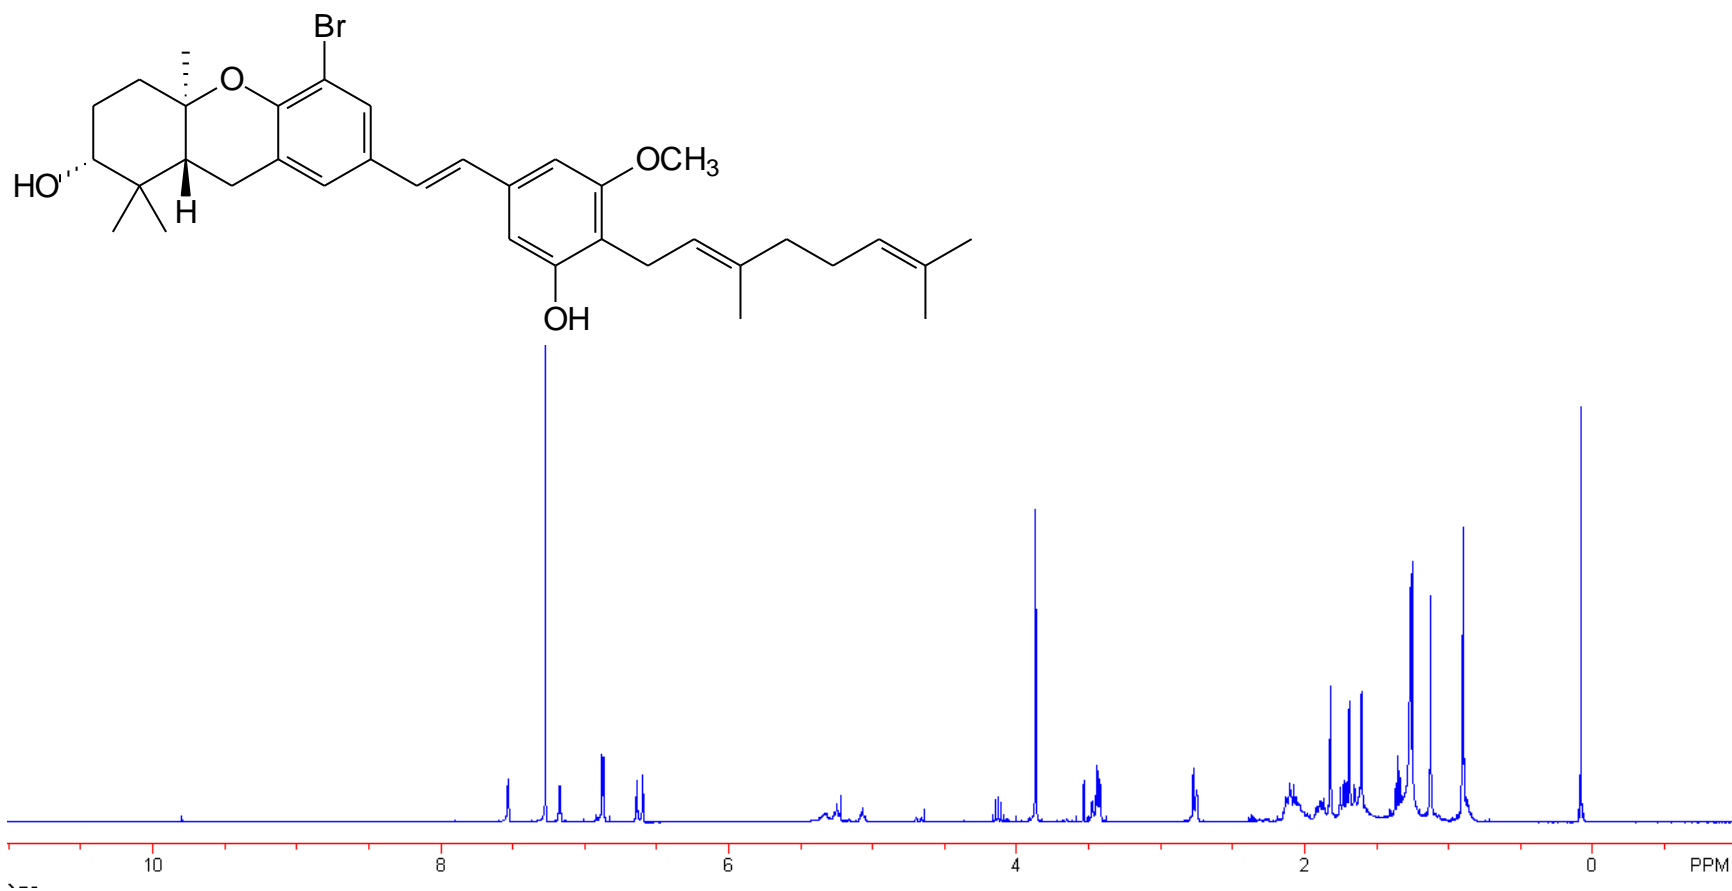

400 MHz  $^1\text{H}$  NMR Spectrum of Compound 52



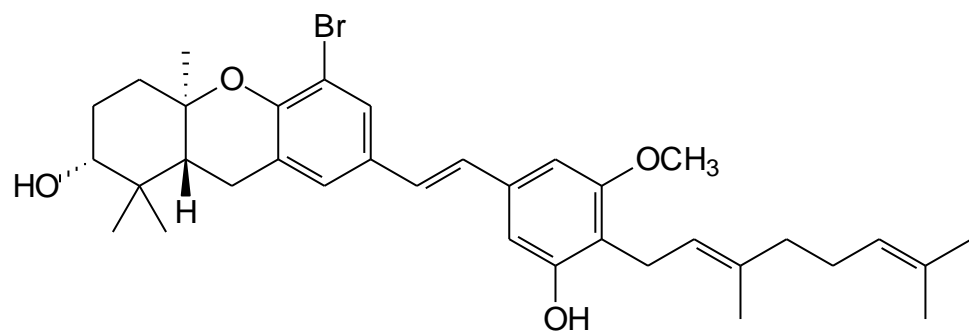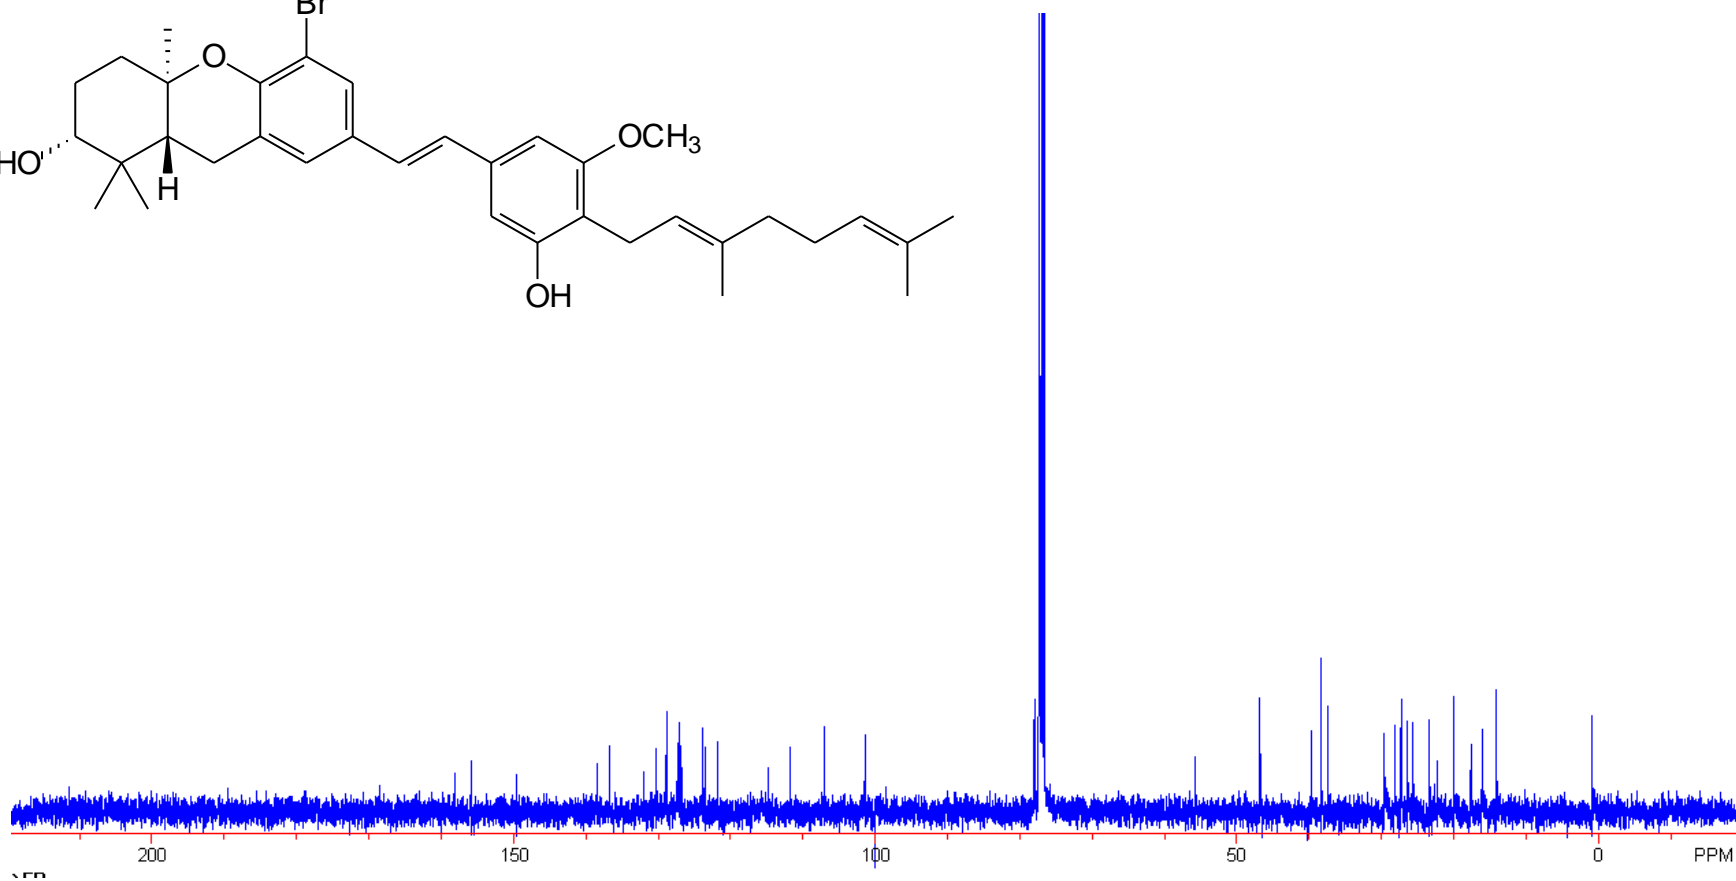

100 MHz  $^{13}\text{C}$  NMR Spectrum of Compound 52

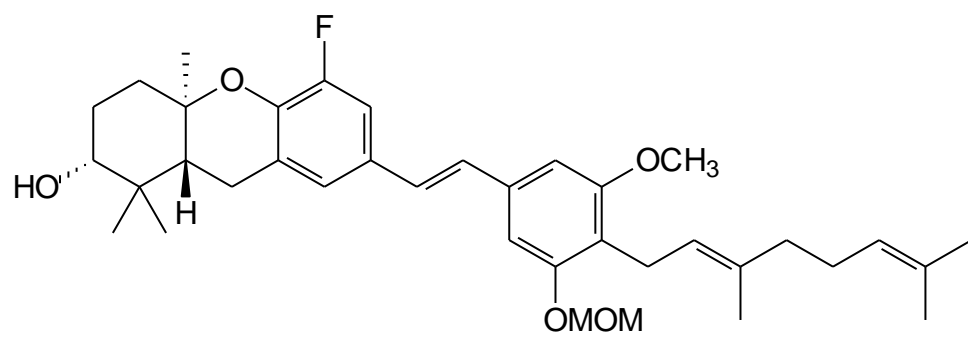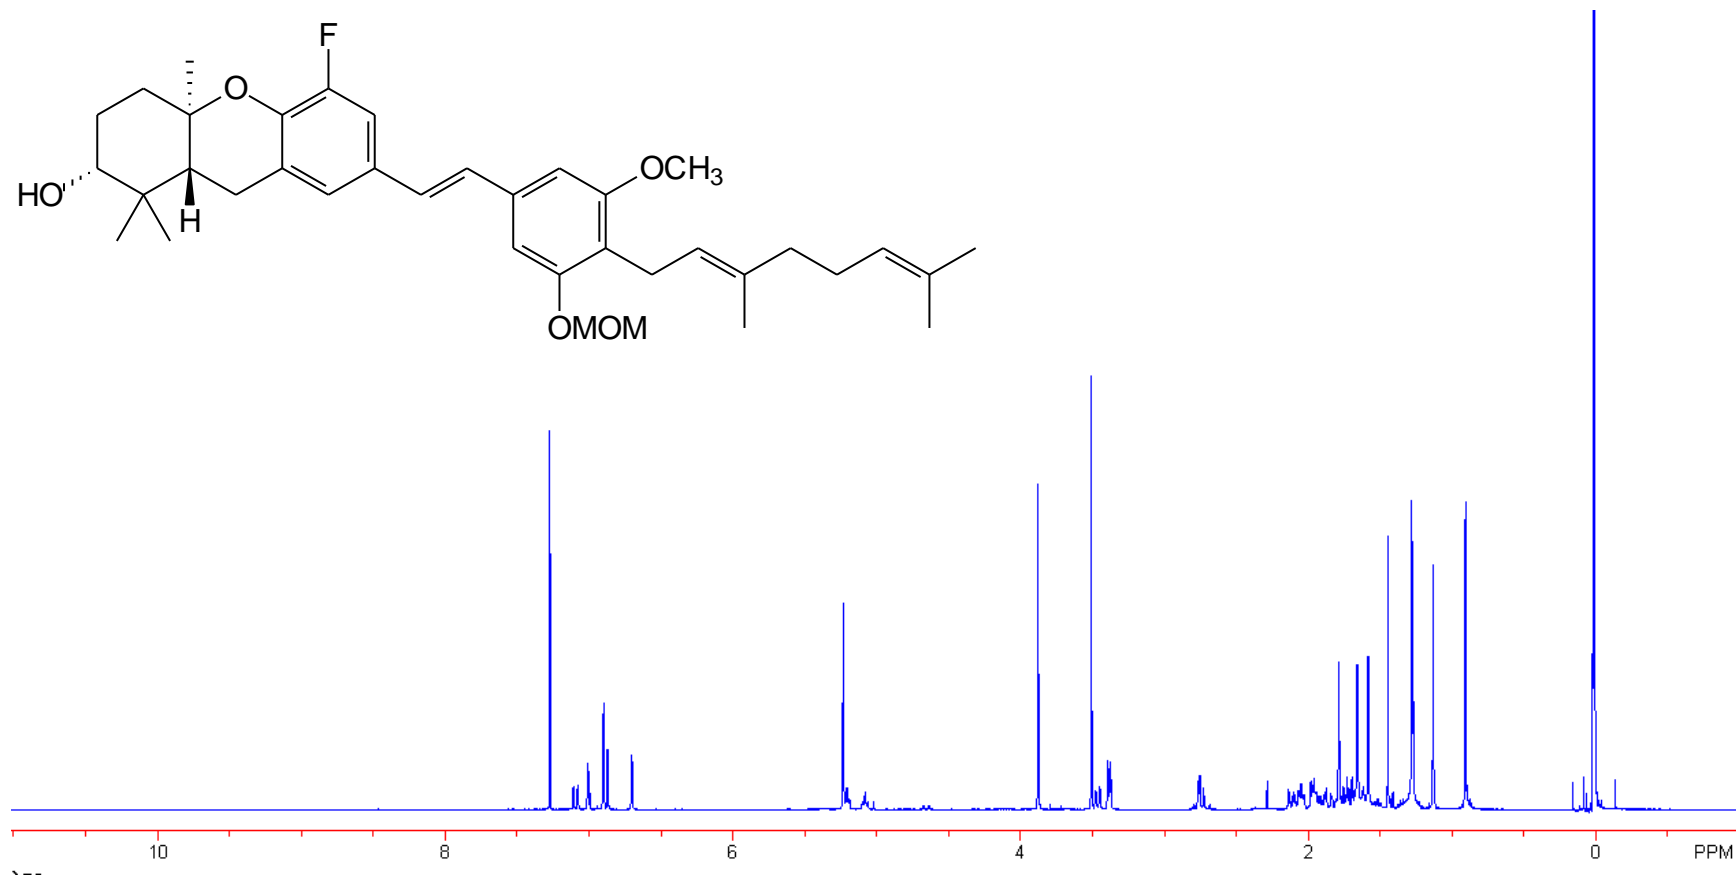

400 MHz <sup>1</sup>H NMR Spectrum of Compound 45

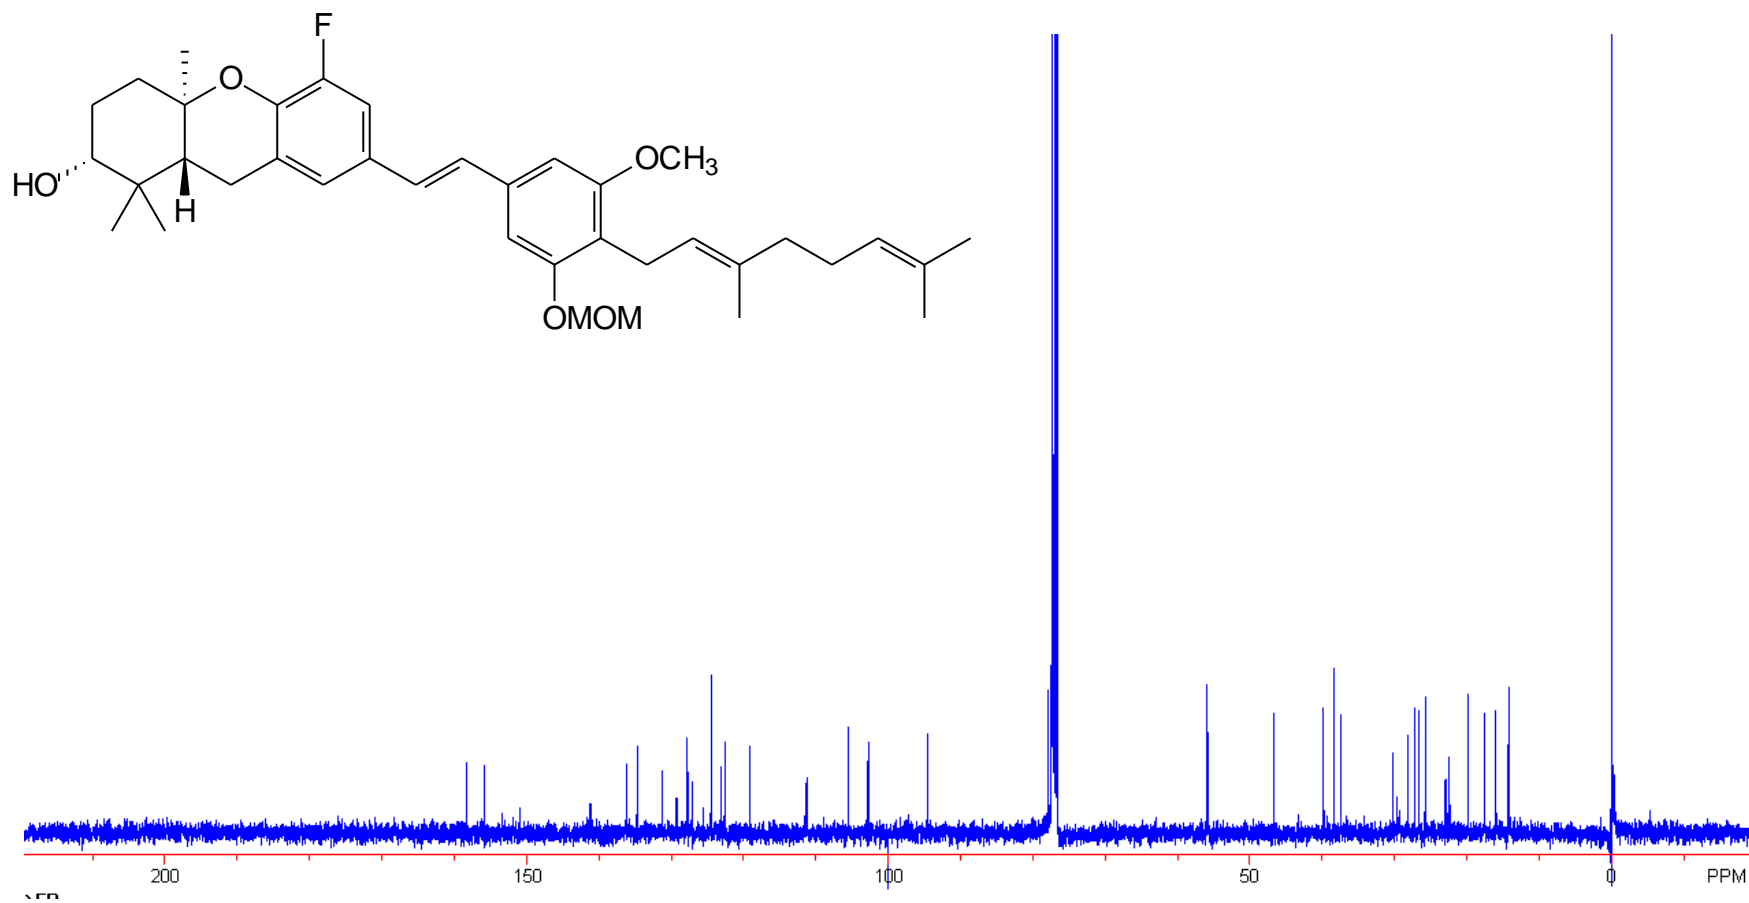

100 MHz  $^{13}\text{C}$  NMR Spectrum of Compound 45

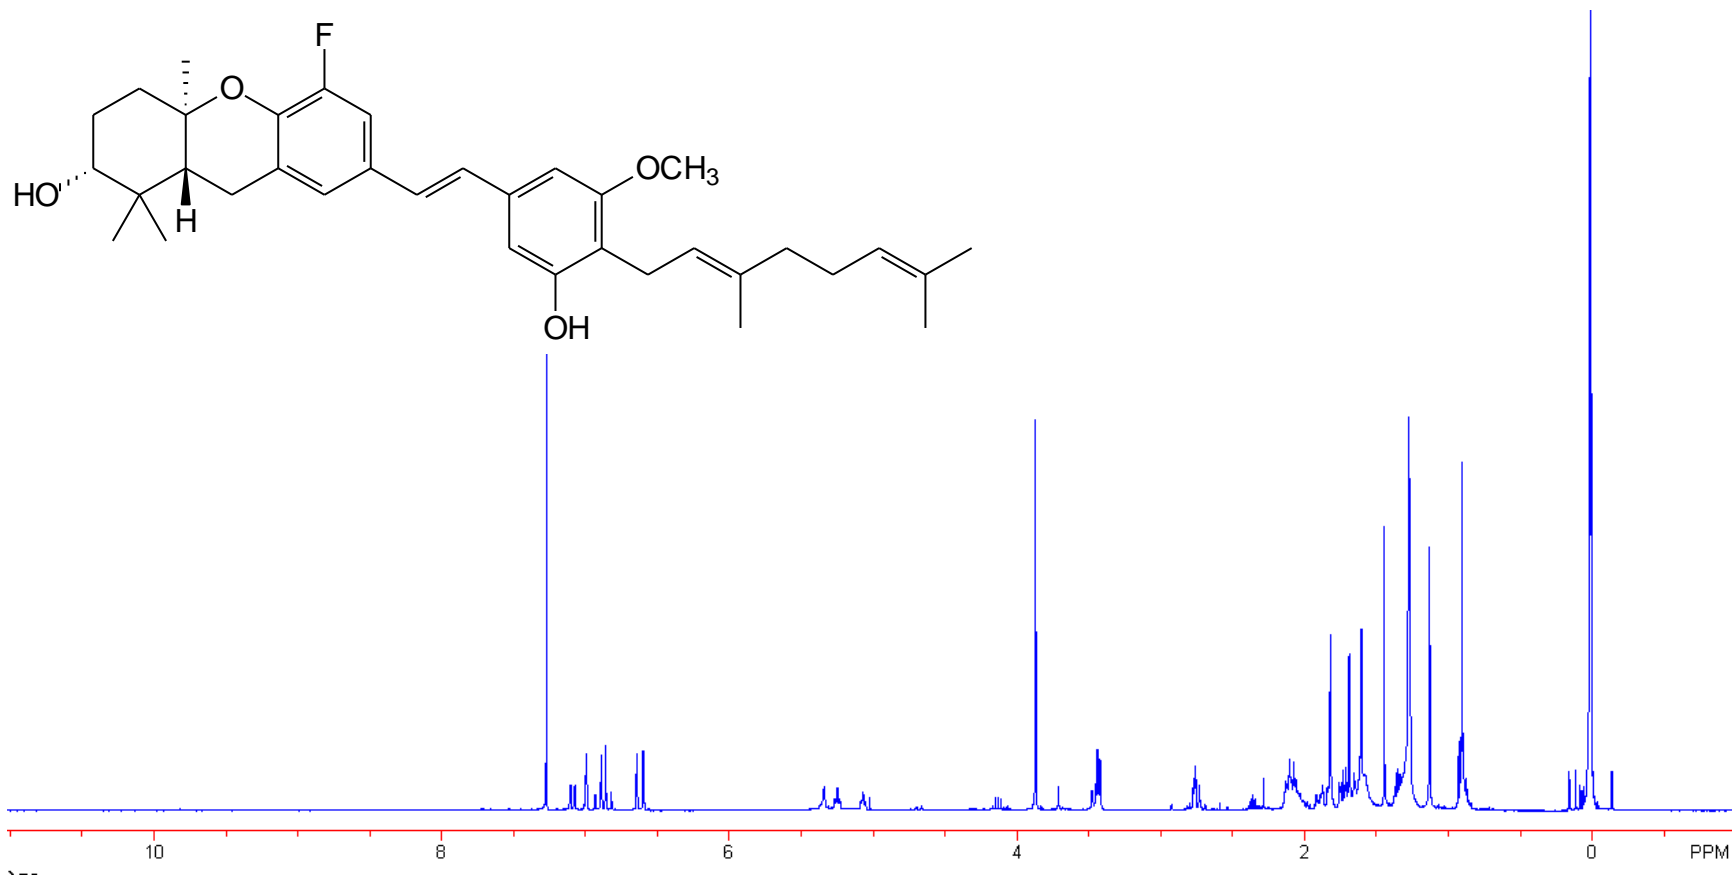

400 MHz  $^1\text{H}$  NMR Spectrum of Compound 53

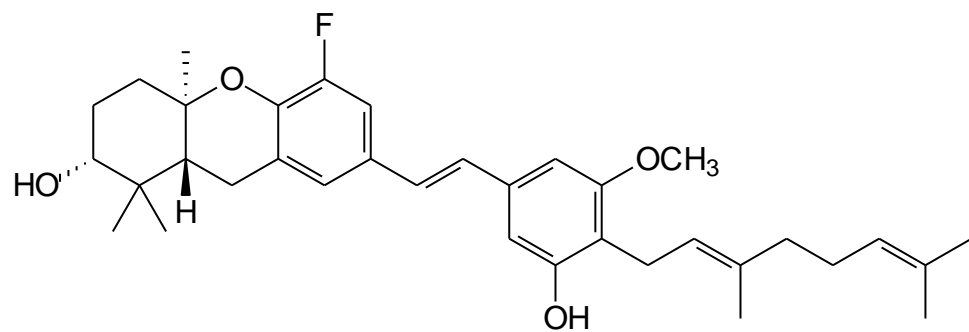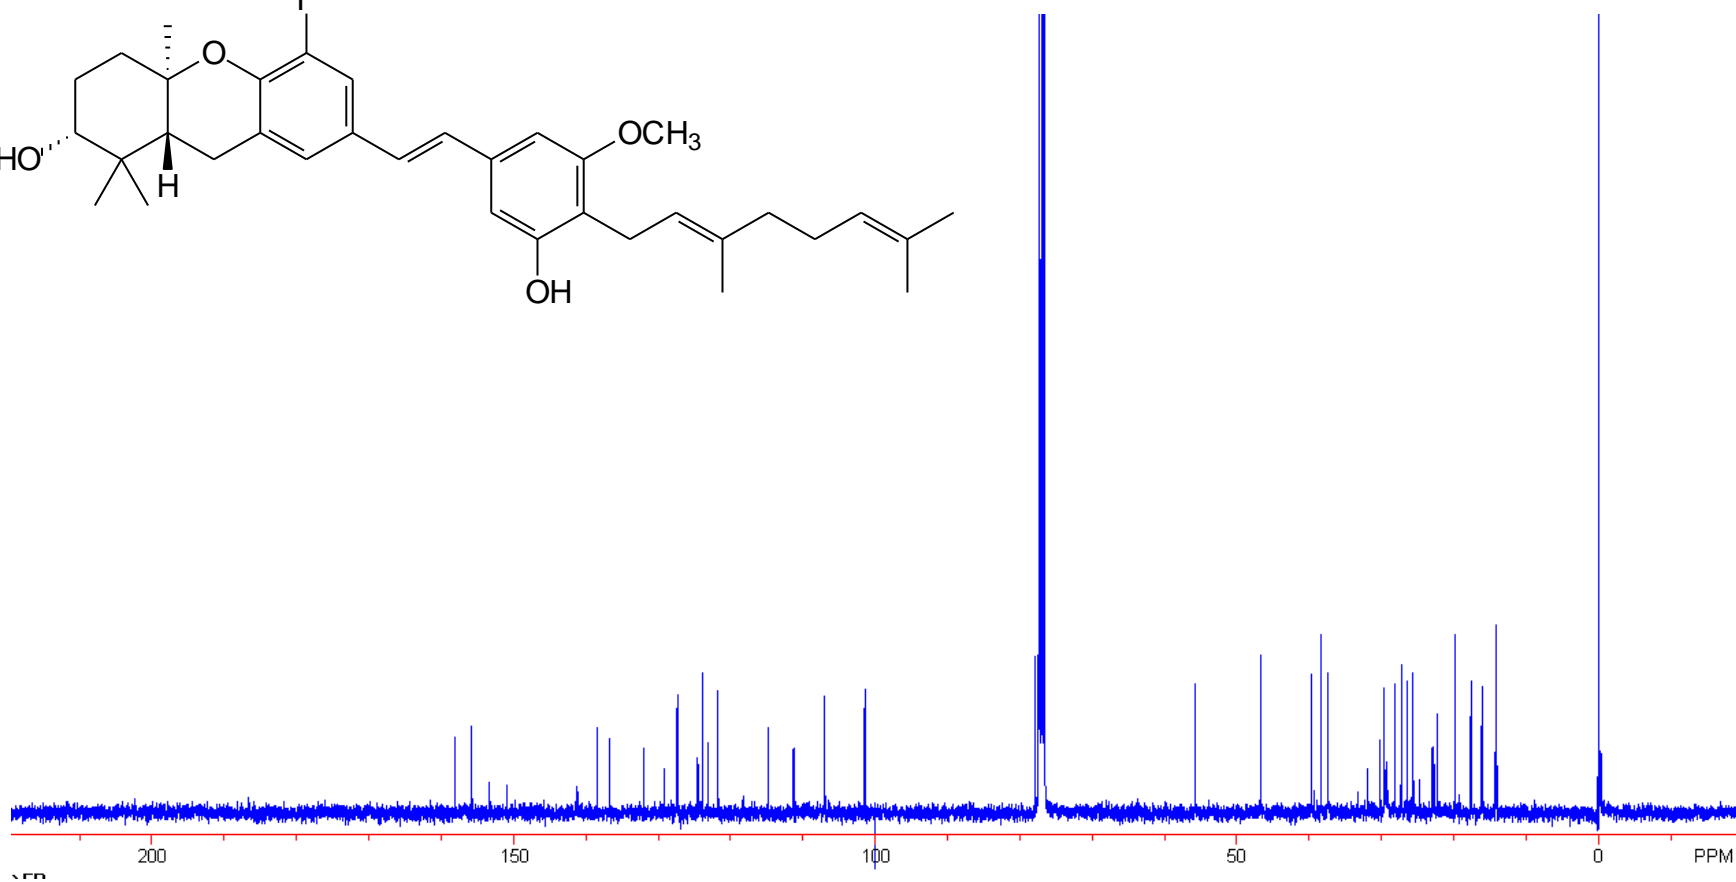

100 MHz <sup>13</sup>C NMR Spectrum of Compound 53

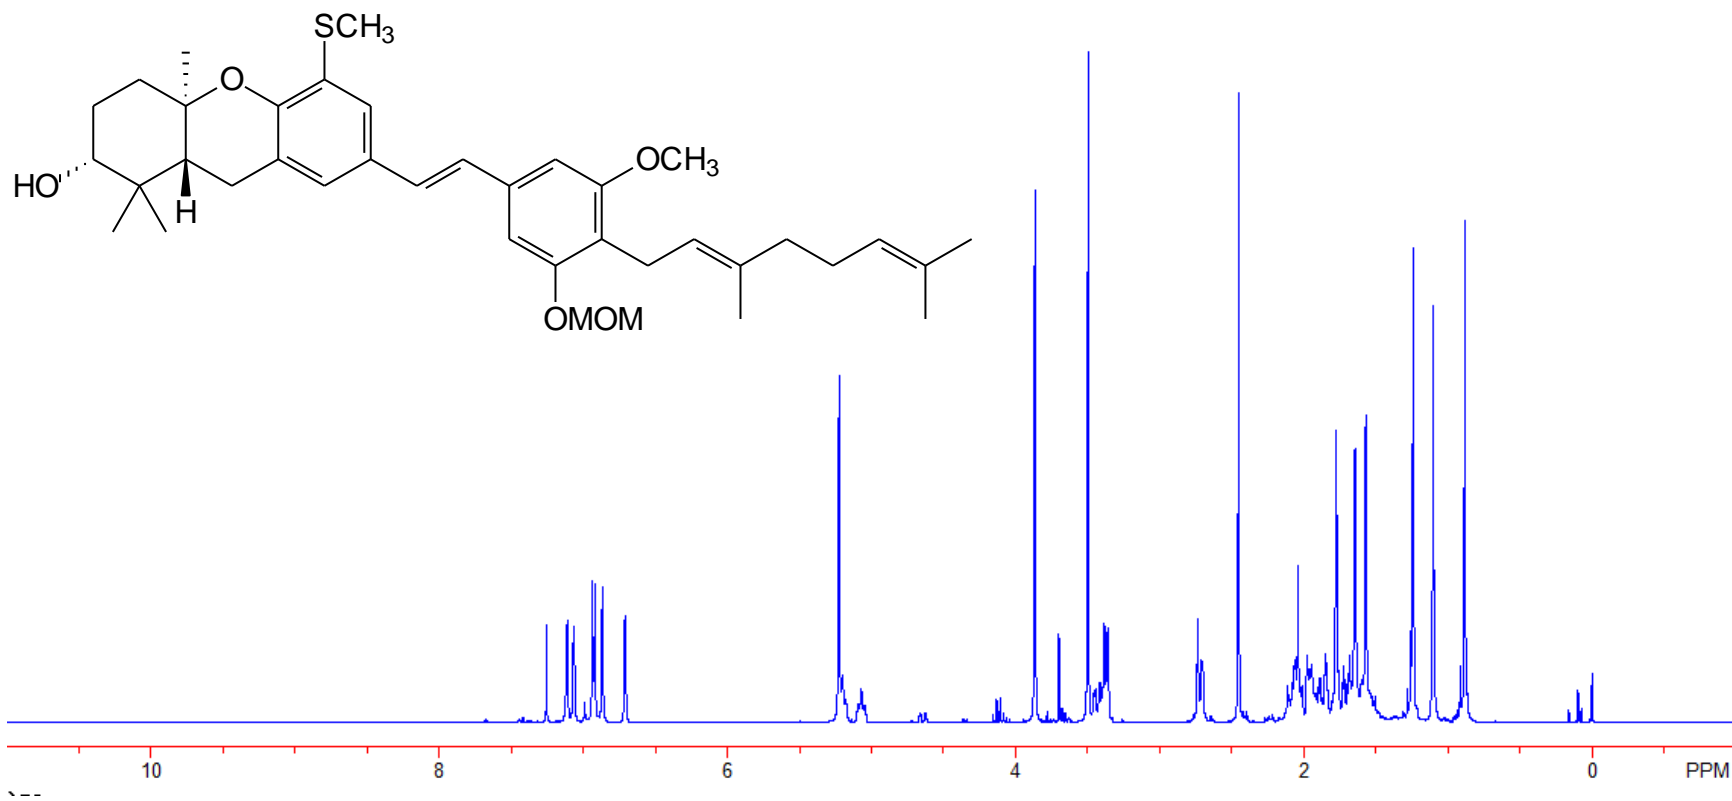

300 MHz  $^1\text{H}$  NMR Spectrum of Compound 46

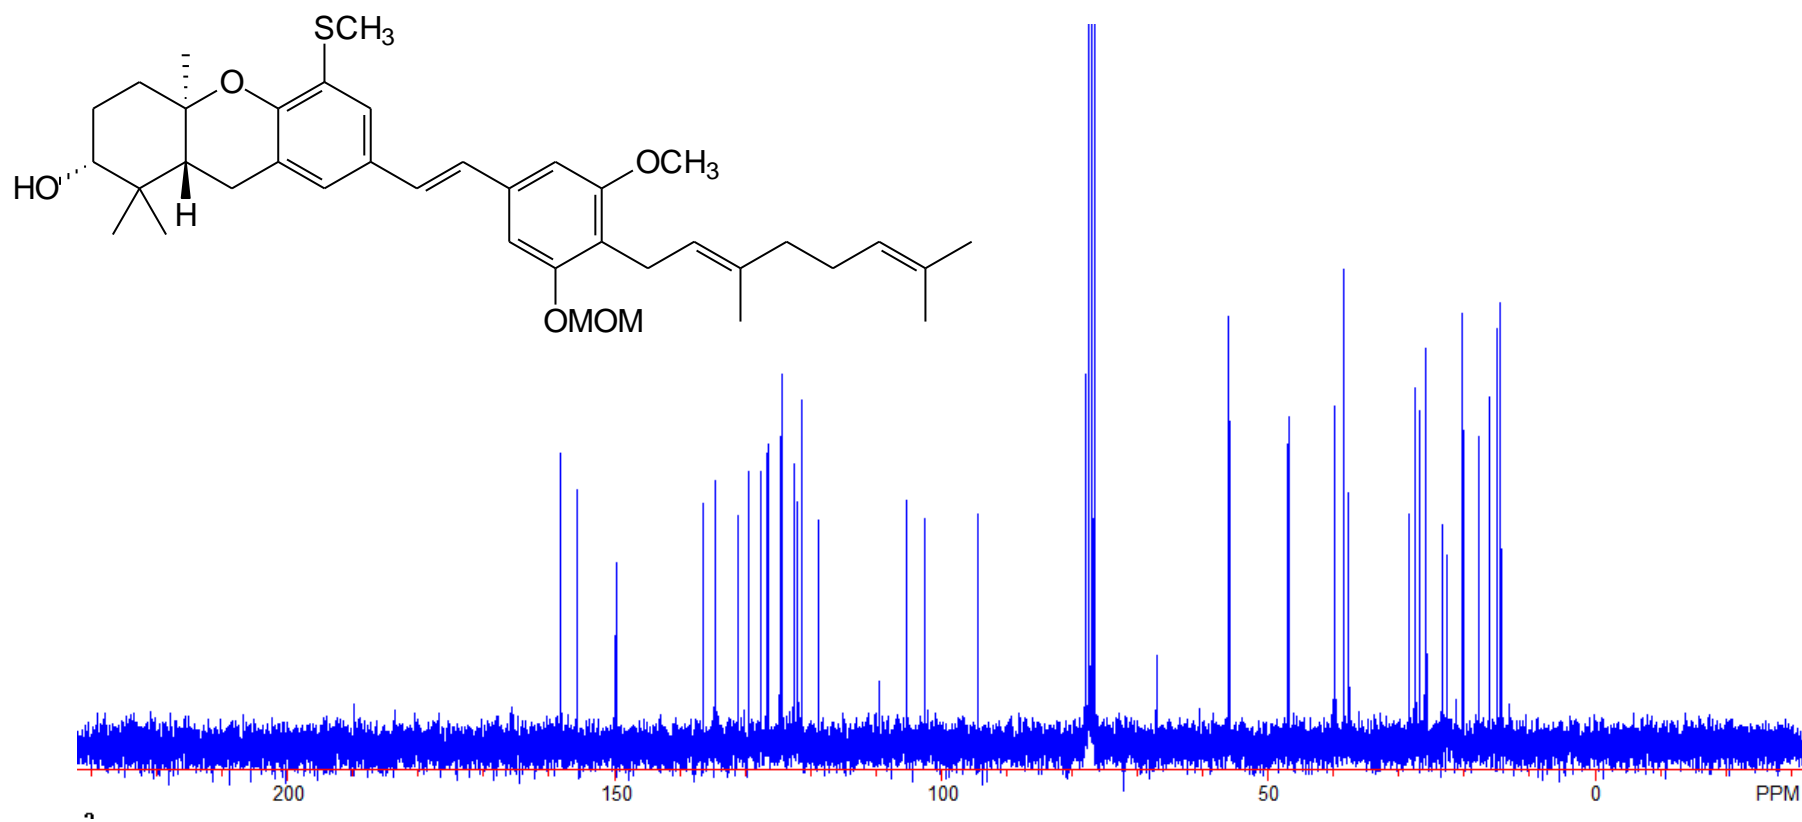

75 MHz <sup>13</sup>C NMR Spectrum of Compound 46

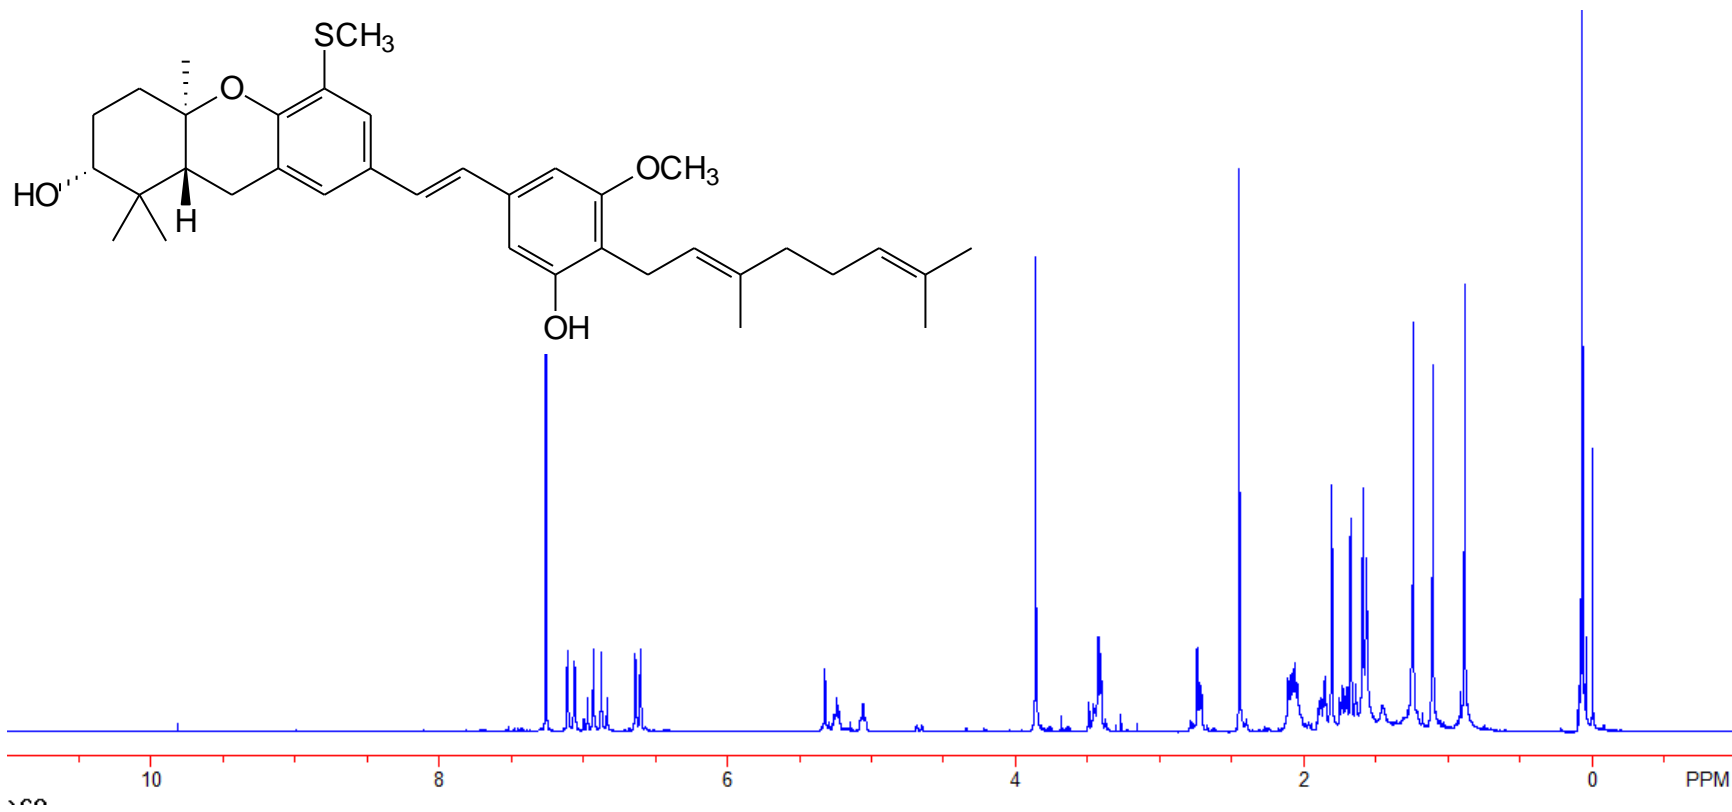

400 MHz  $^1\text{H}$  NMR Spectrum of Compound 54



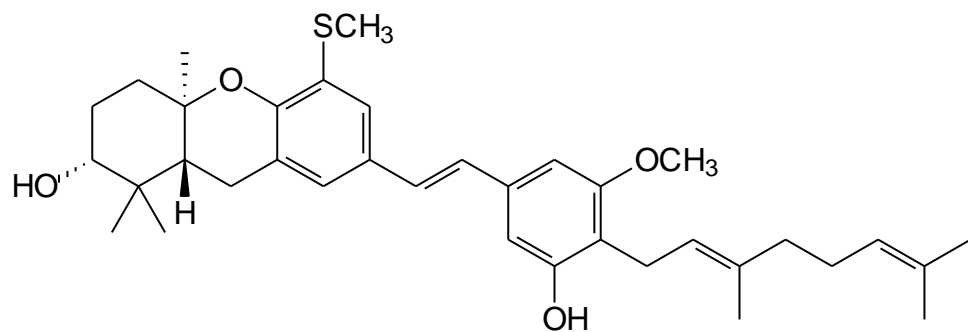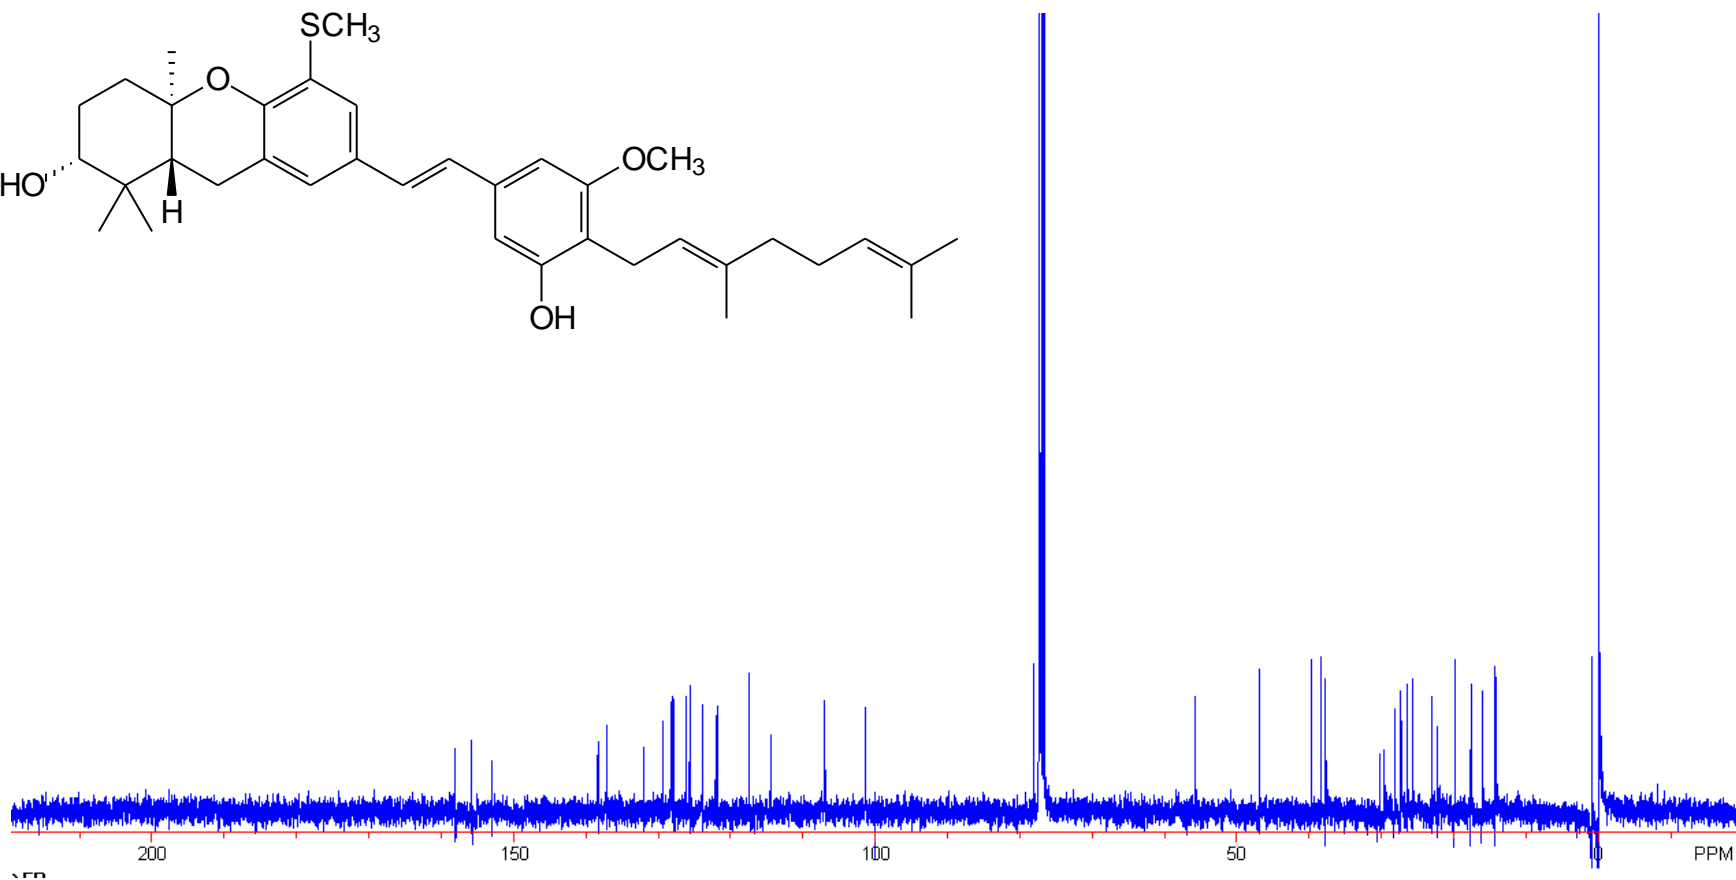

100 MHz <sup>13</sup>C NMR Spectrum of Compound 54

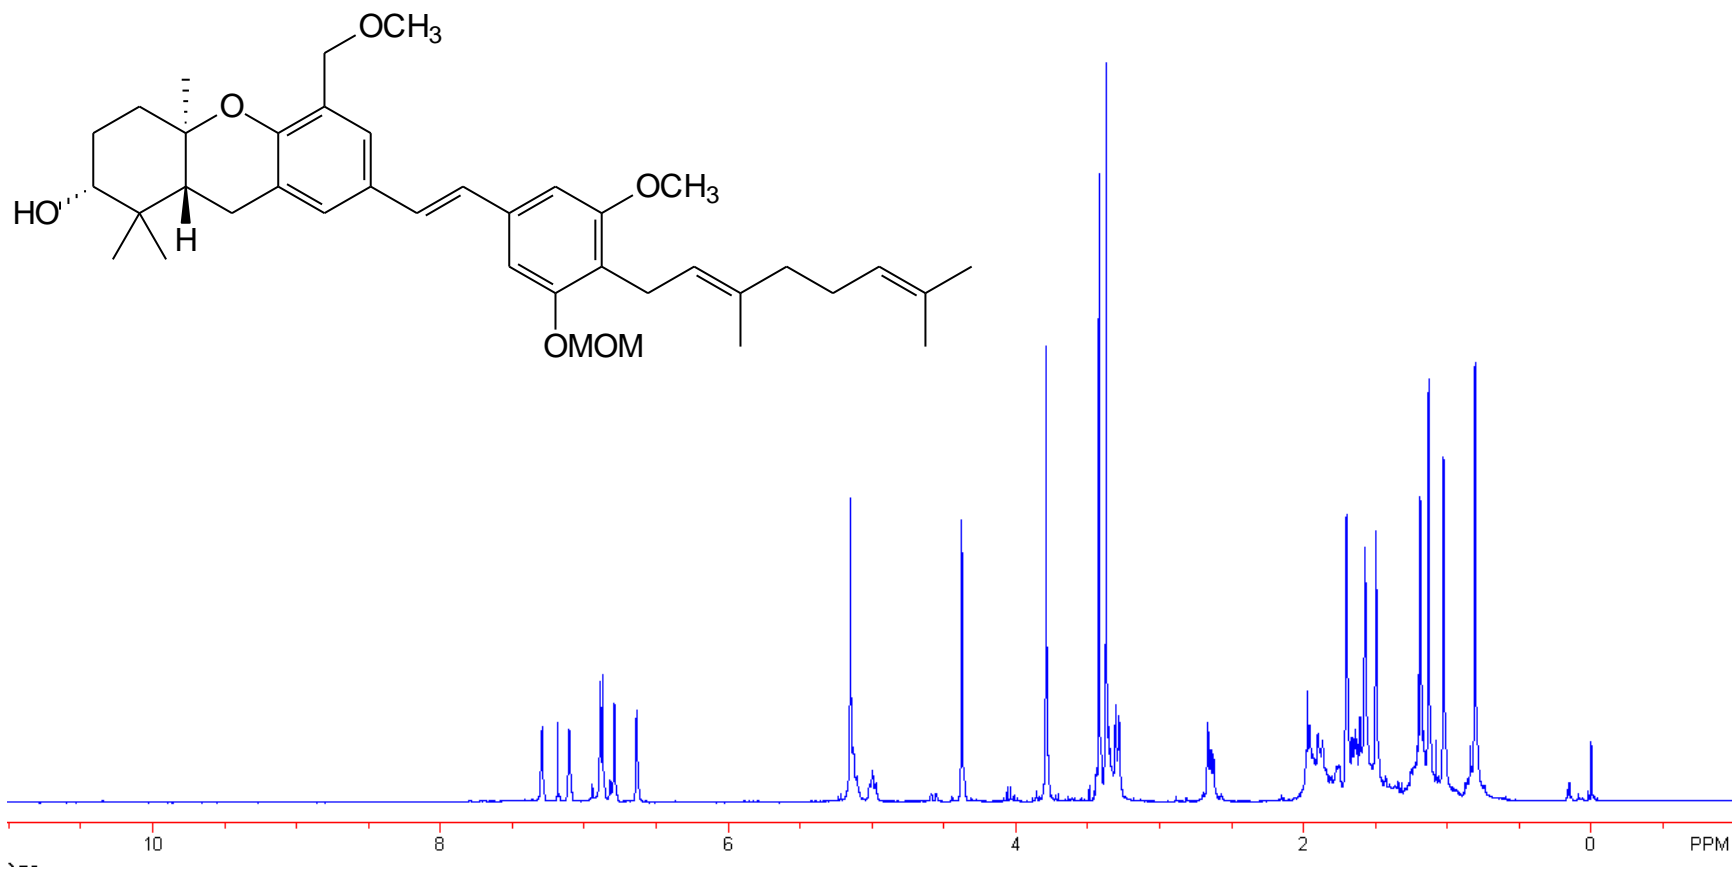

300 MHz <sup>1</sup>H NMR Spectrum of Compound 47

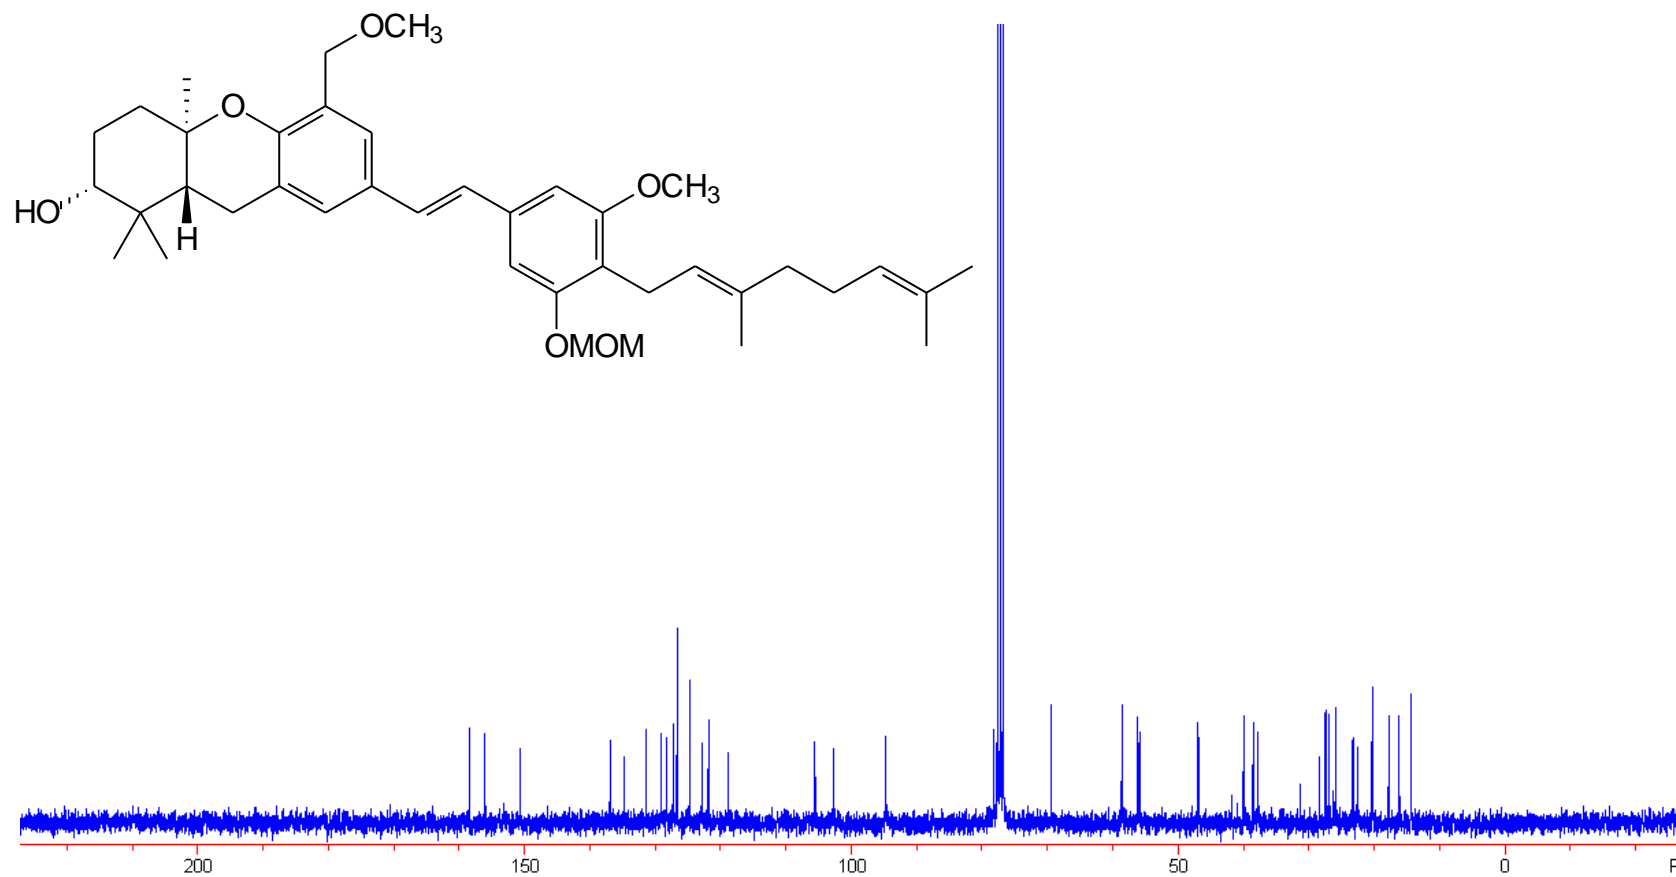

75 MHz  $^{13}\text{C}$  NMR Spectrum of Compound **47**

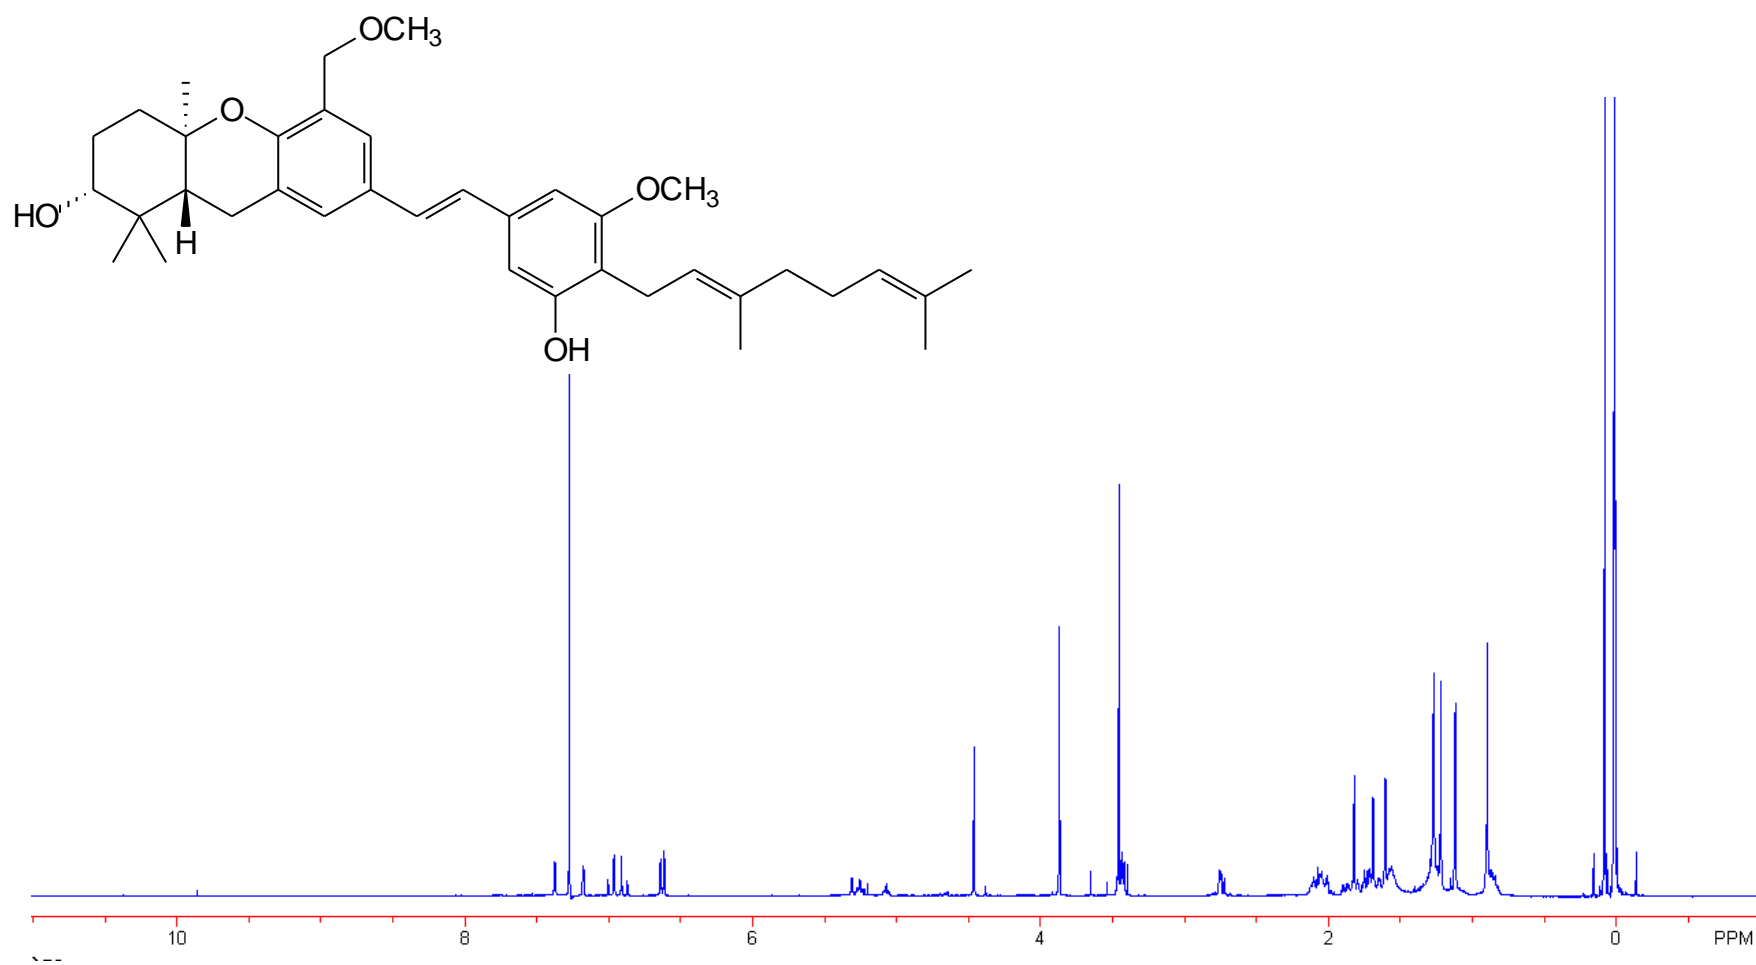

400 MHz <sup>1</sup>H NMR Spectrum of Compound 55

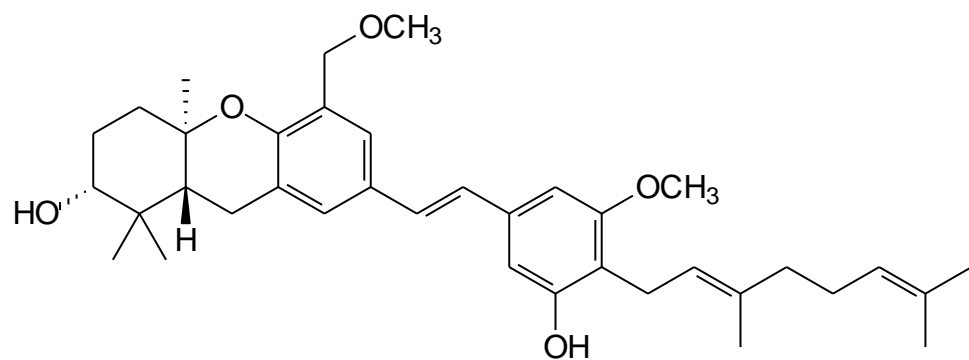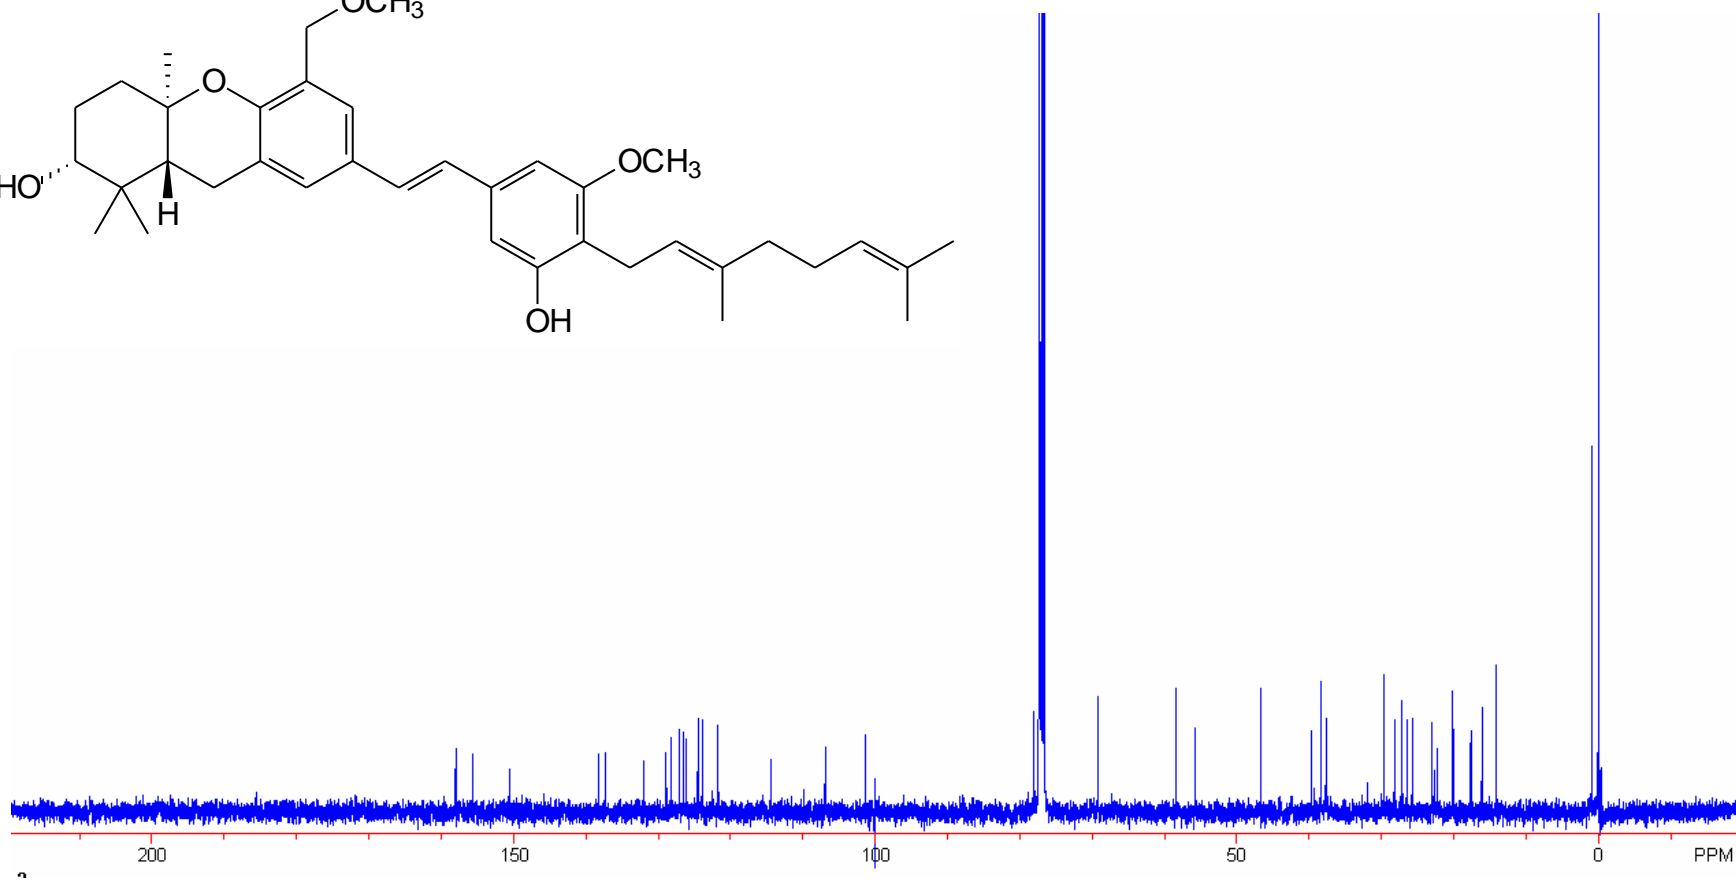

100 MHz  $^{13}\text{C}$  NMR Spectrum of Compound **55**

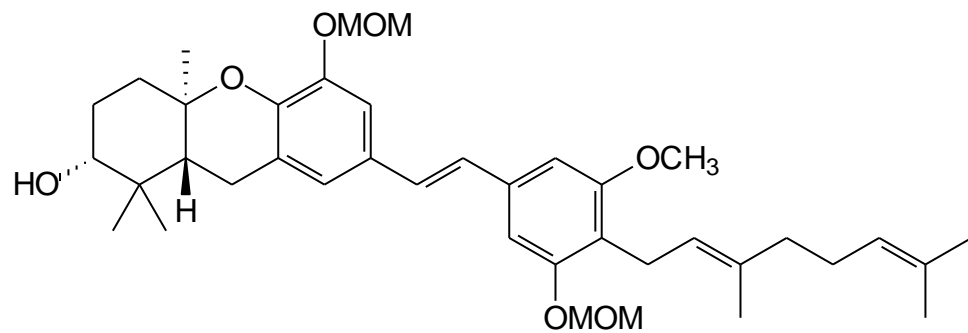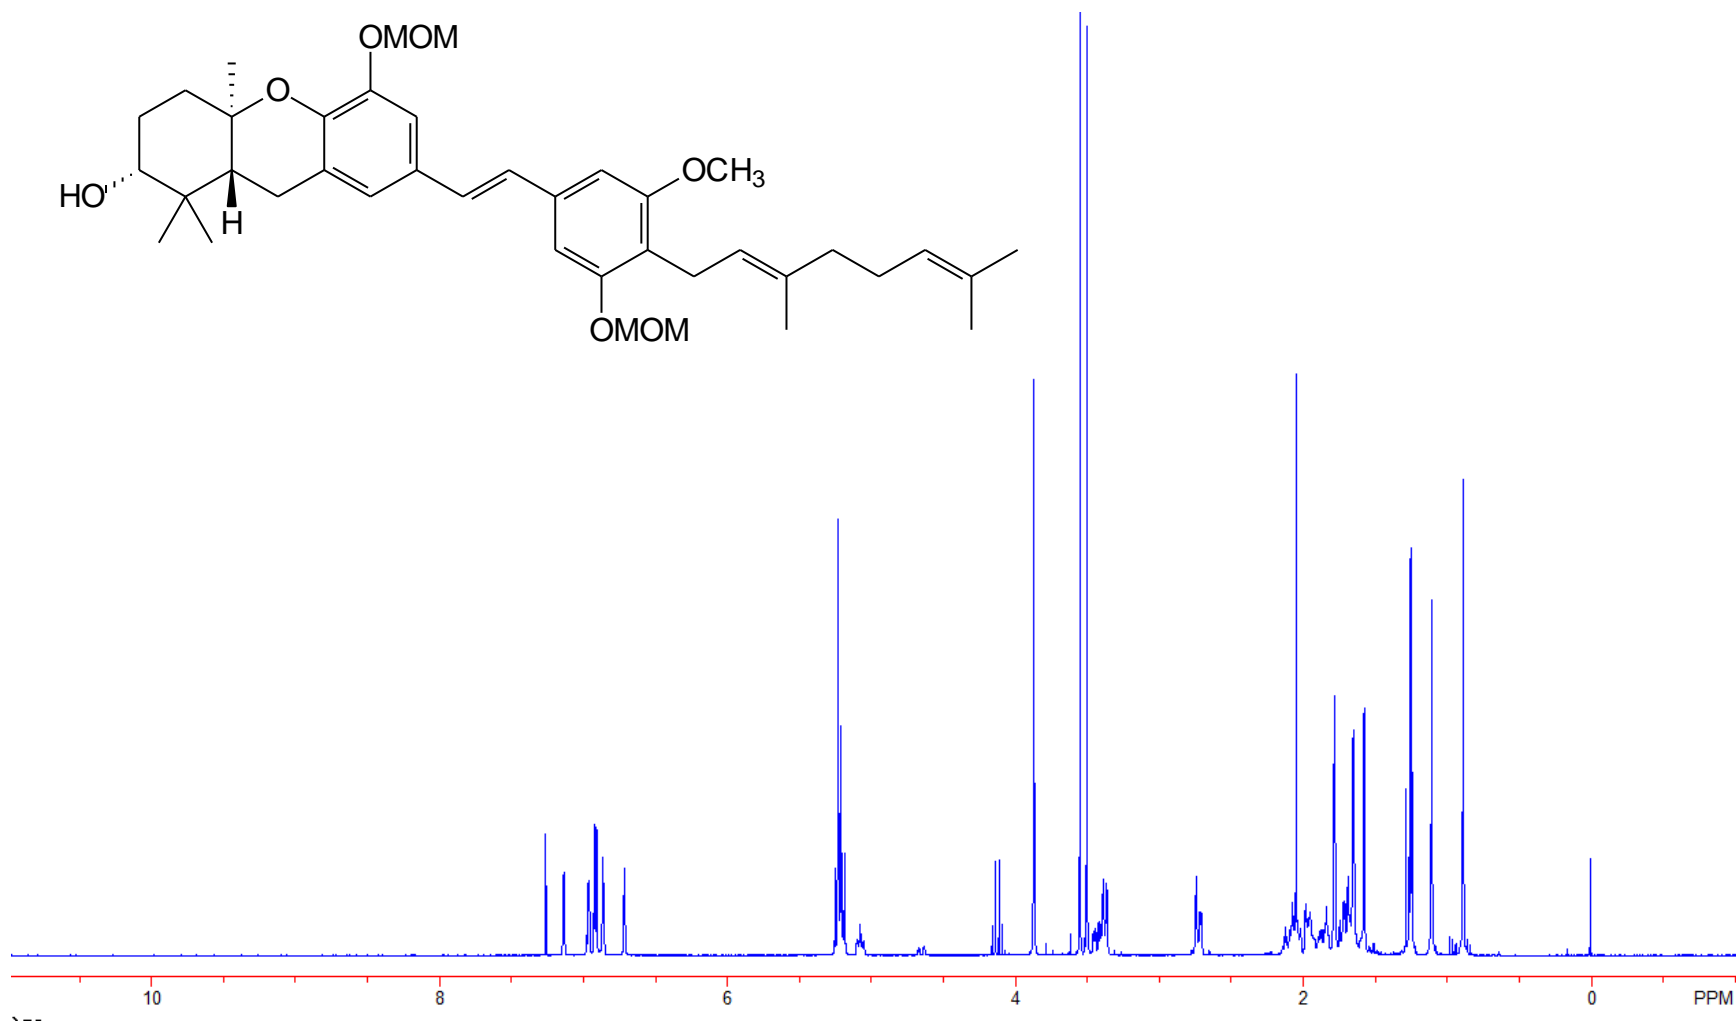

300 MHz <sup>1</sup>H NMR Spectrum of Compound 48

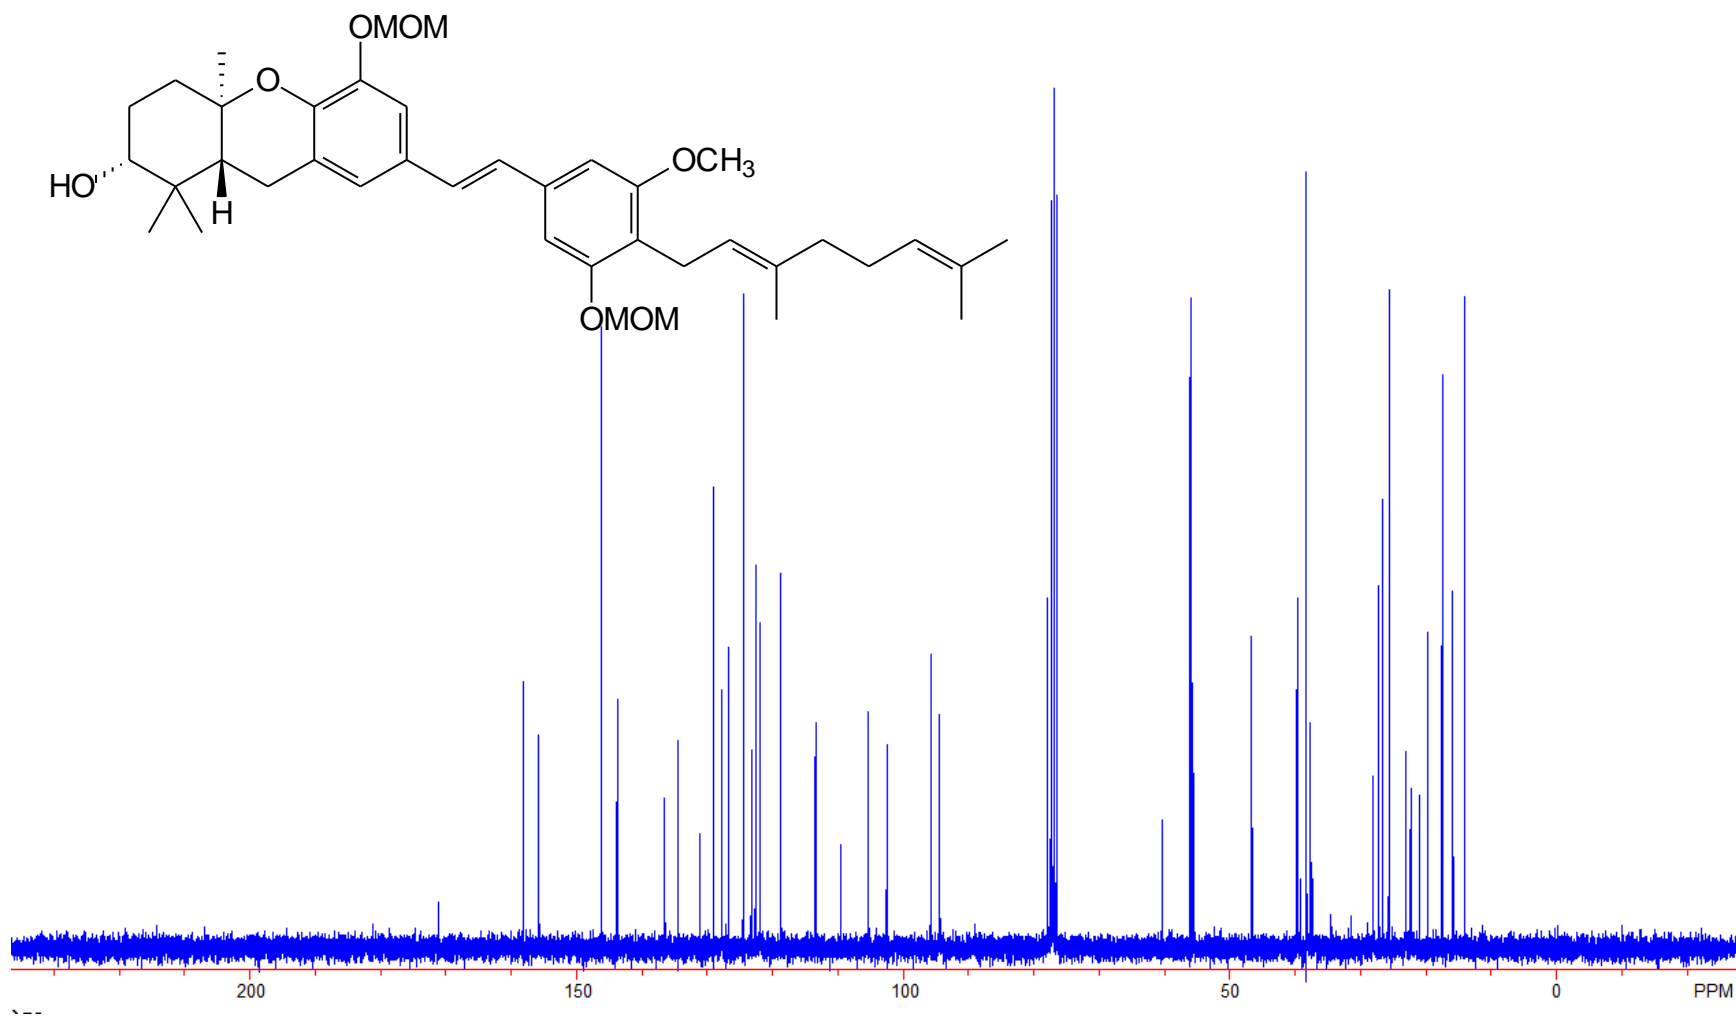

100 MHz <sup>13</sup>C NMR Spectrum of Compound 48

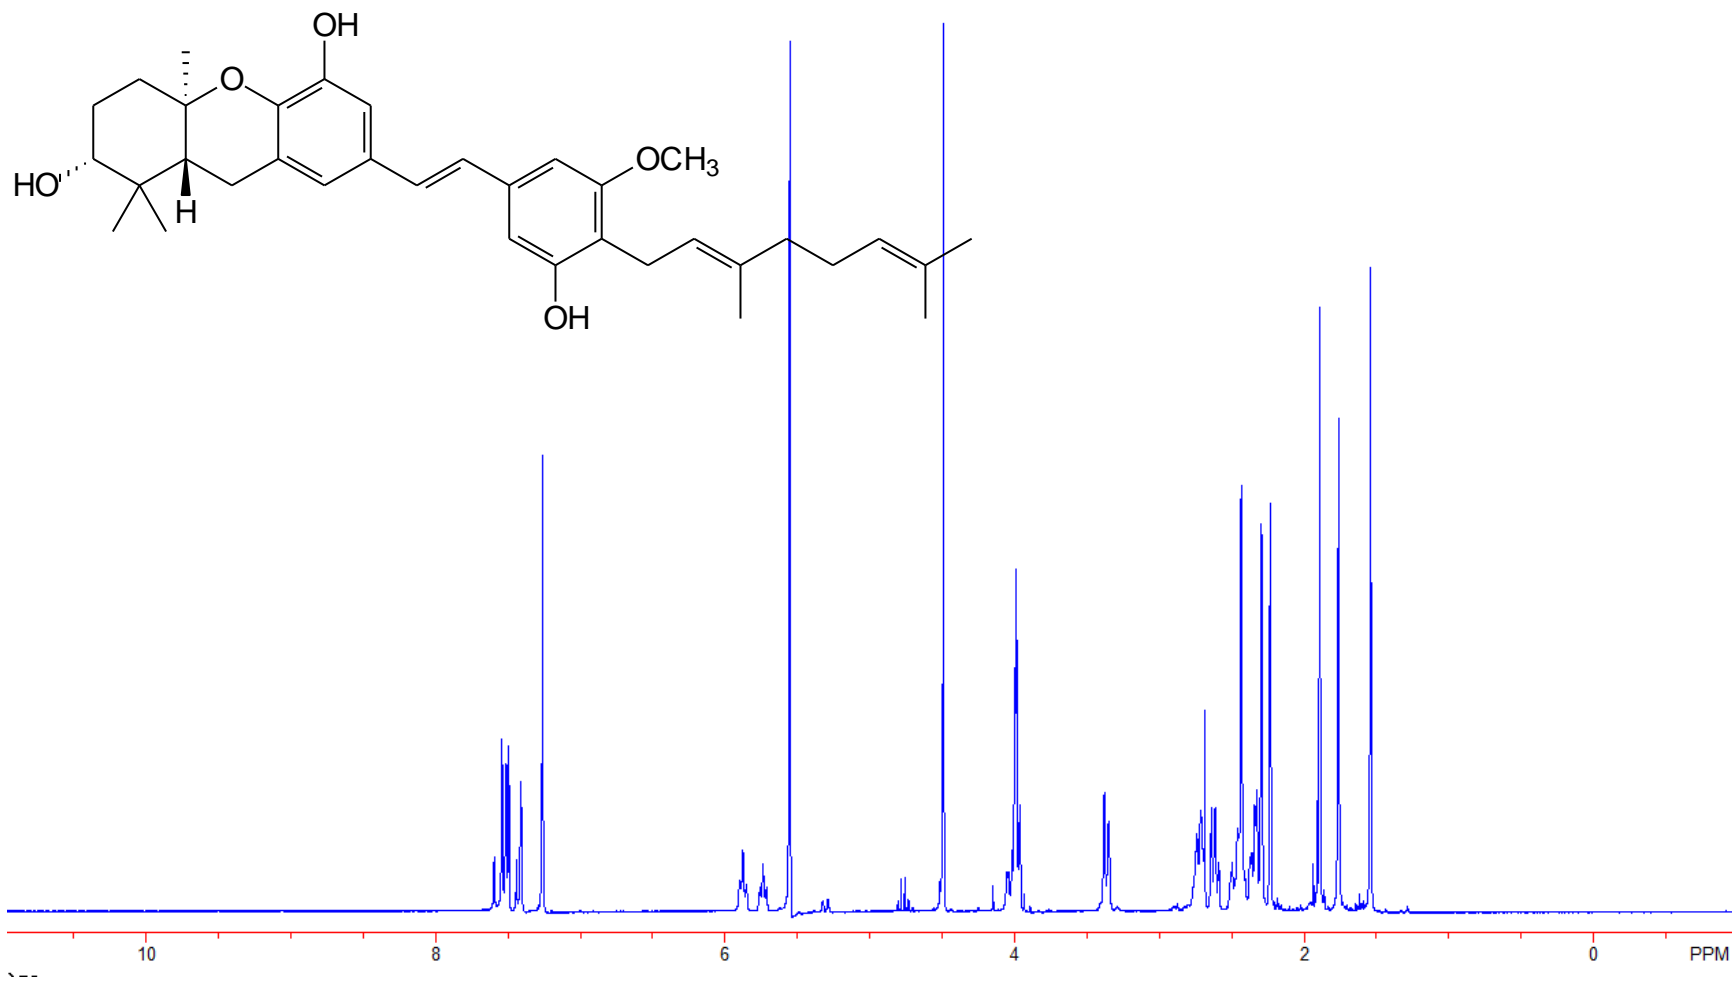

300 MHz  $^1\text{H}$  NMR Spectrum of Compound **56**



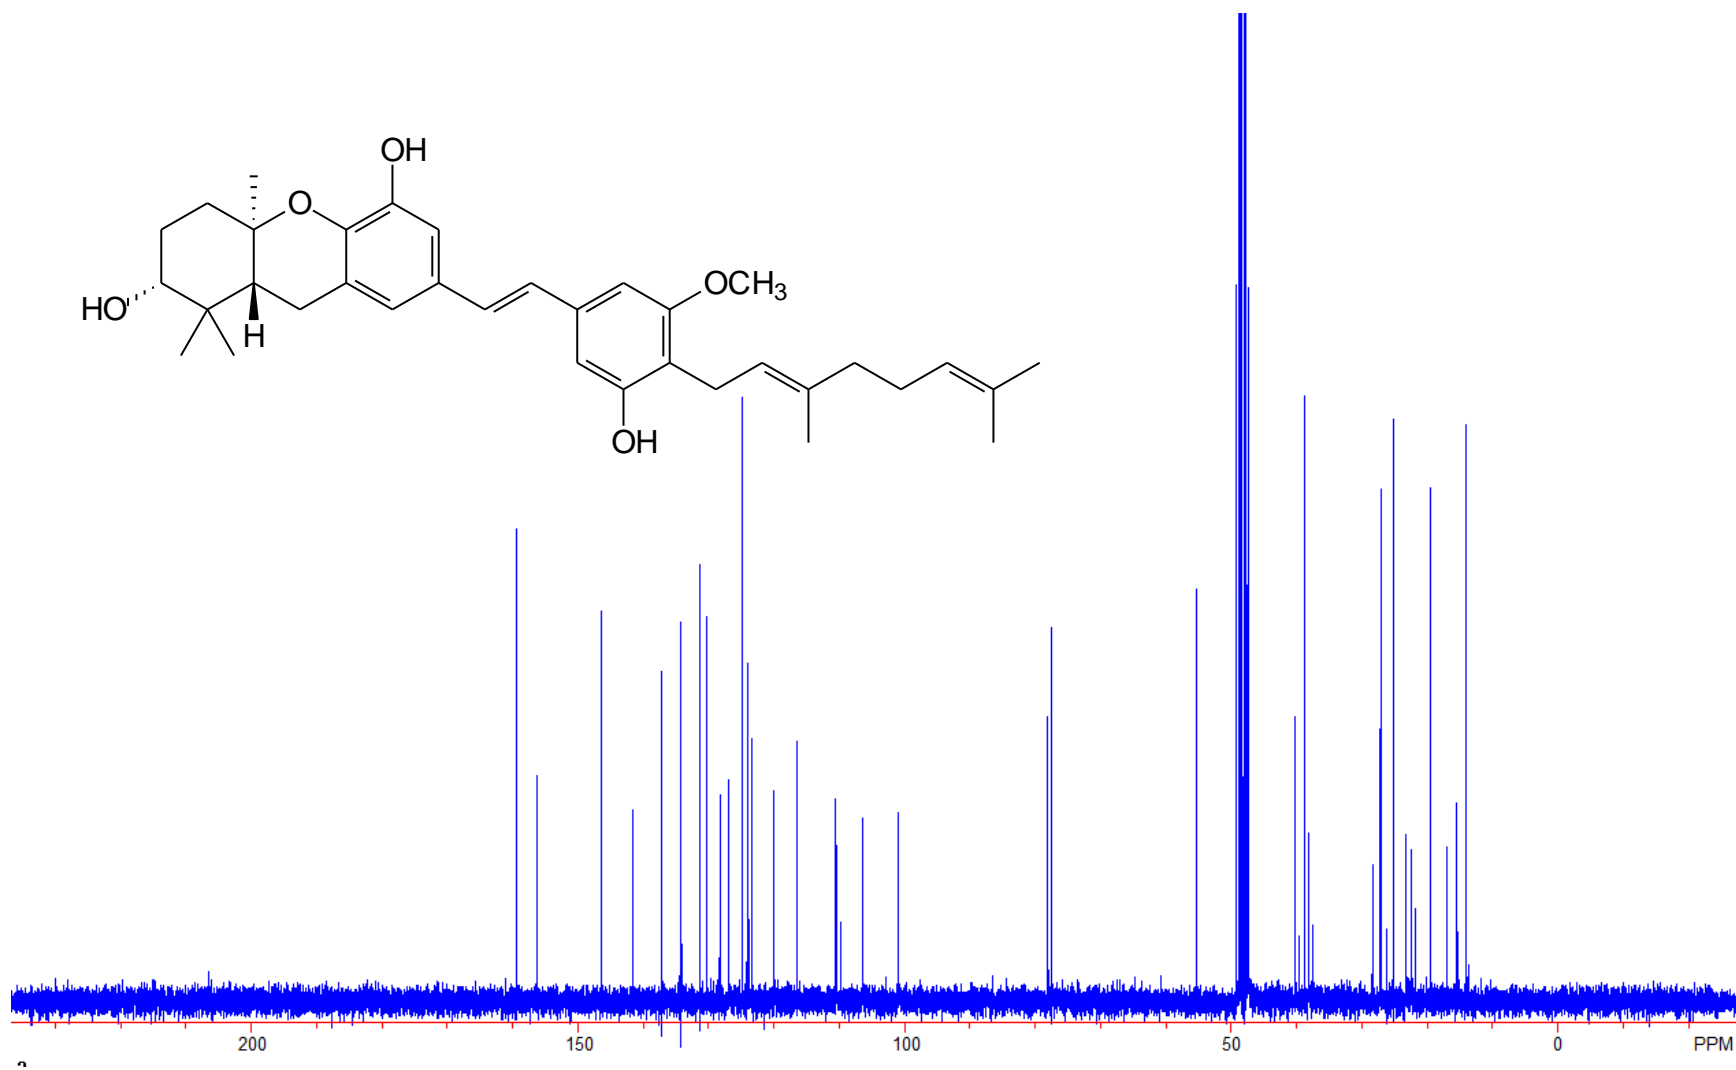

75 MHz  $^{13}\text{C}$  NMR Spectrum of Compound **56**

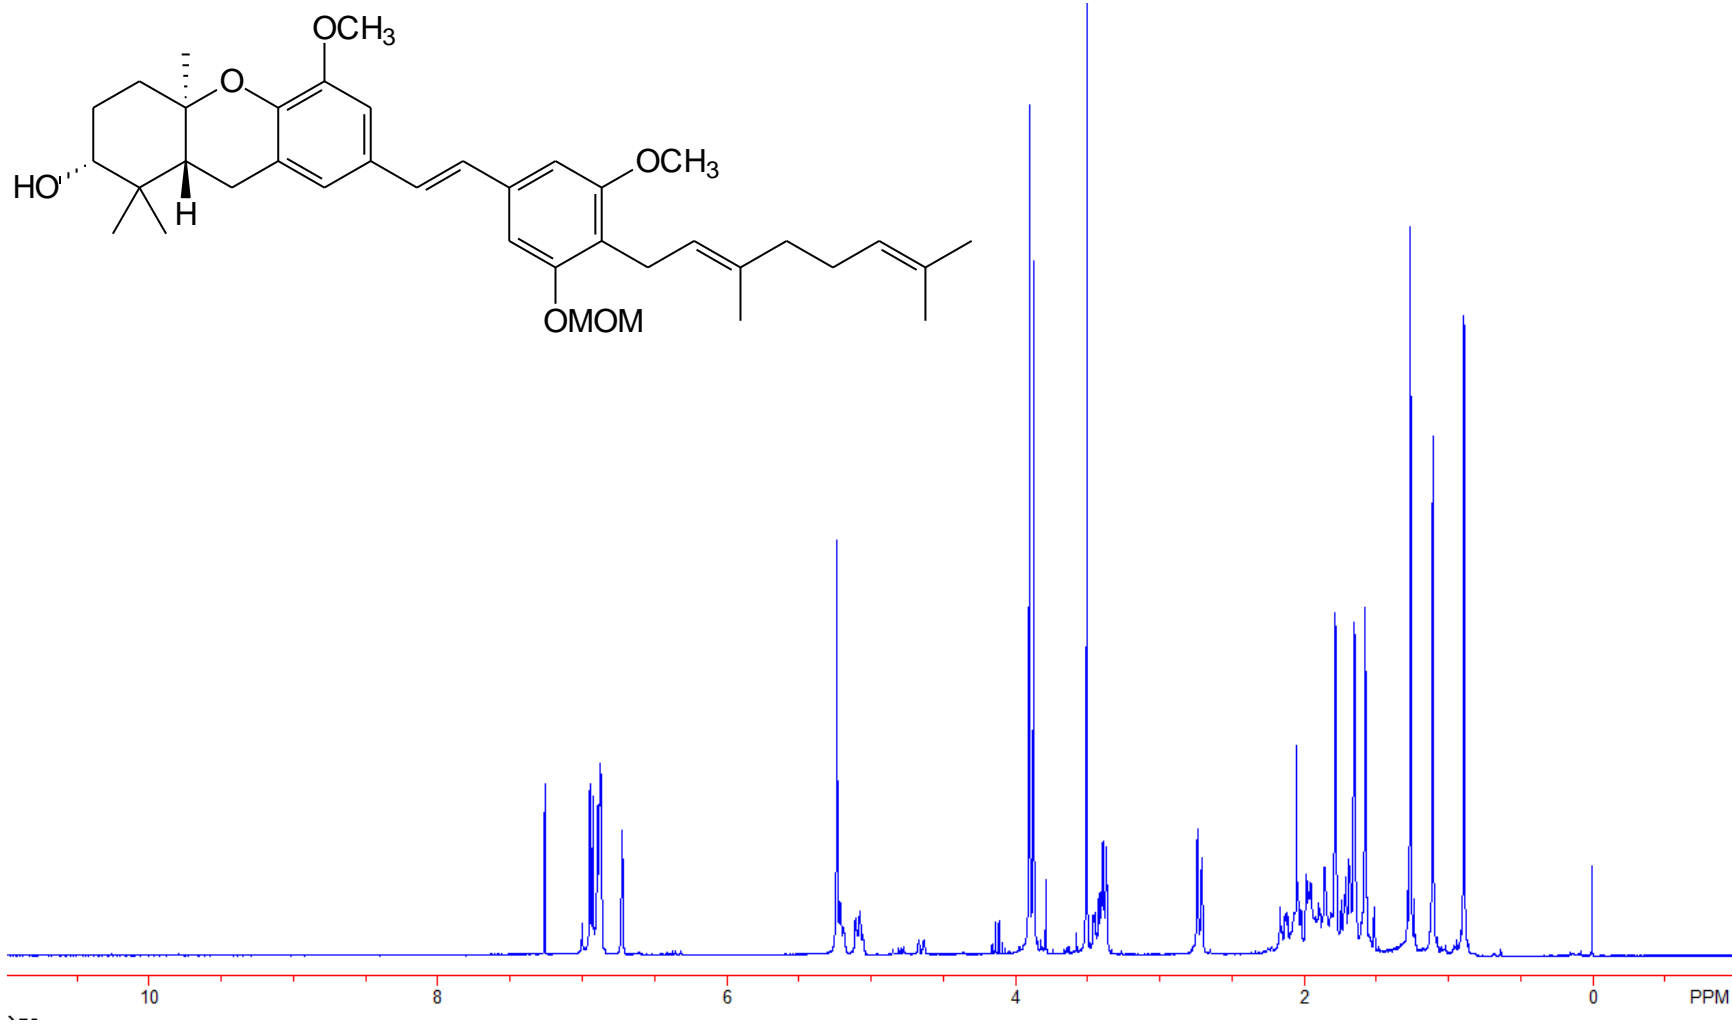

300 MHz  $^1\text{H}$  NMR Spectrum of Compound 49

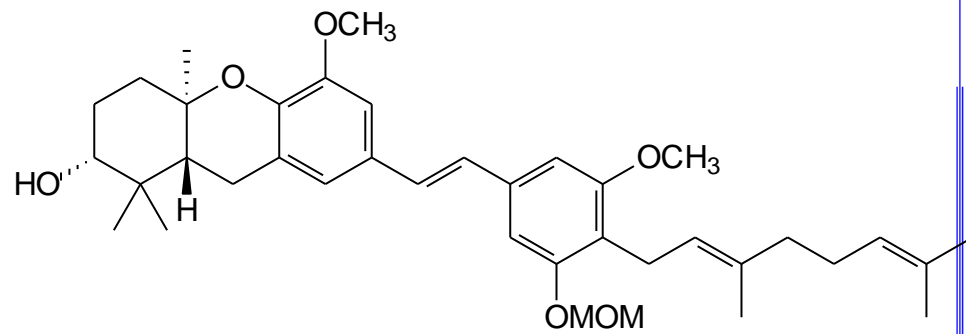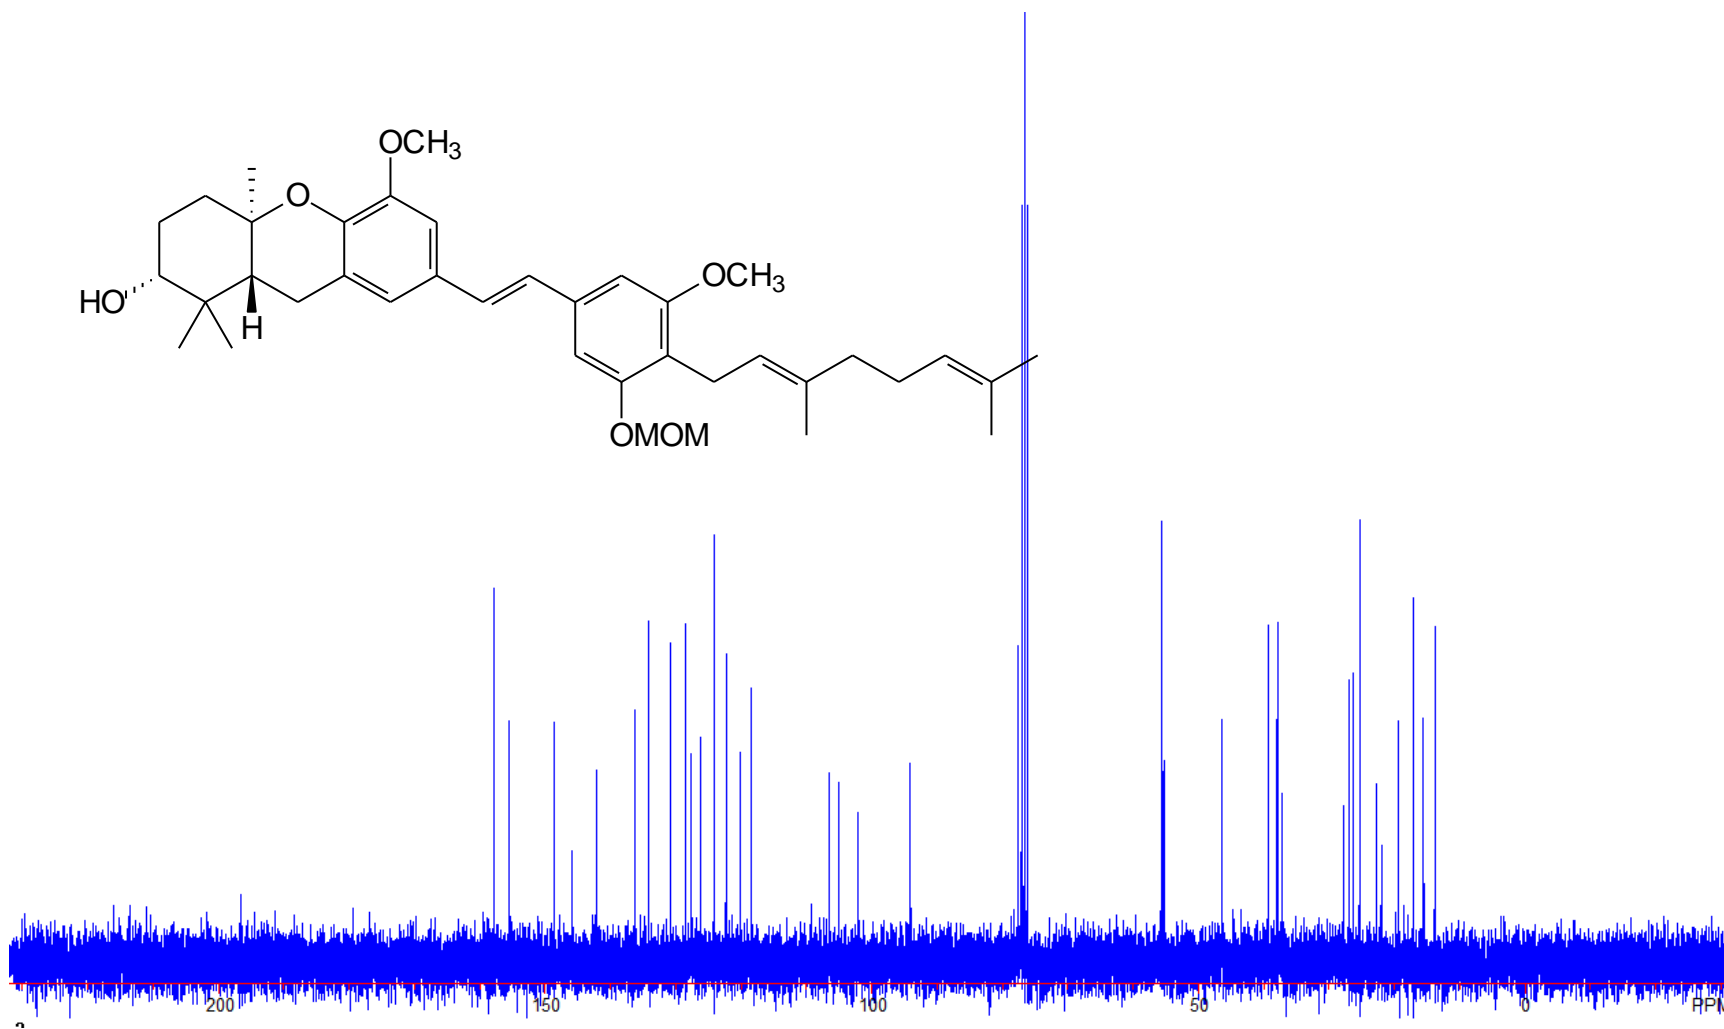

75 MHz <sup>13</sup>C NMR Spectrum of Compound 49

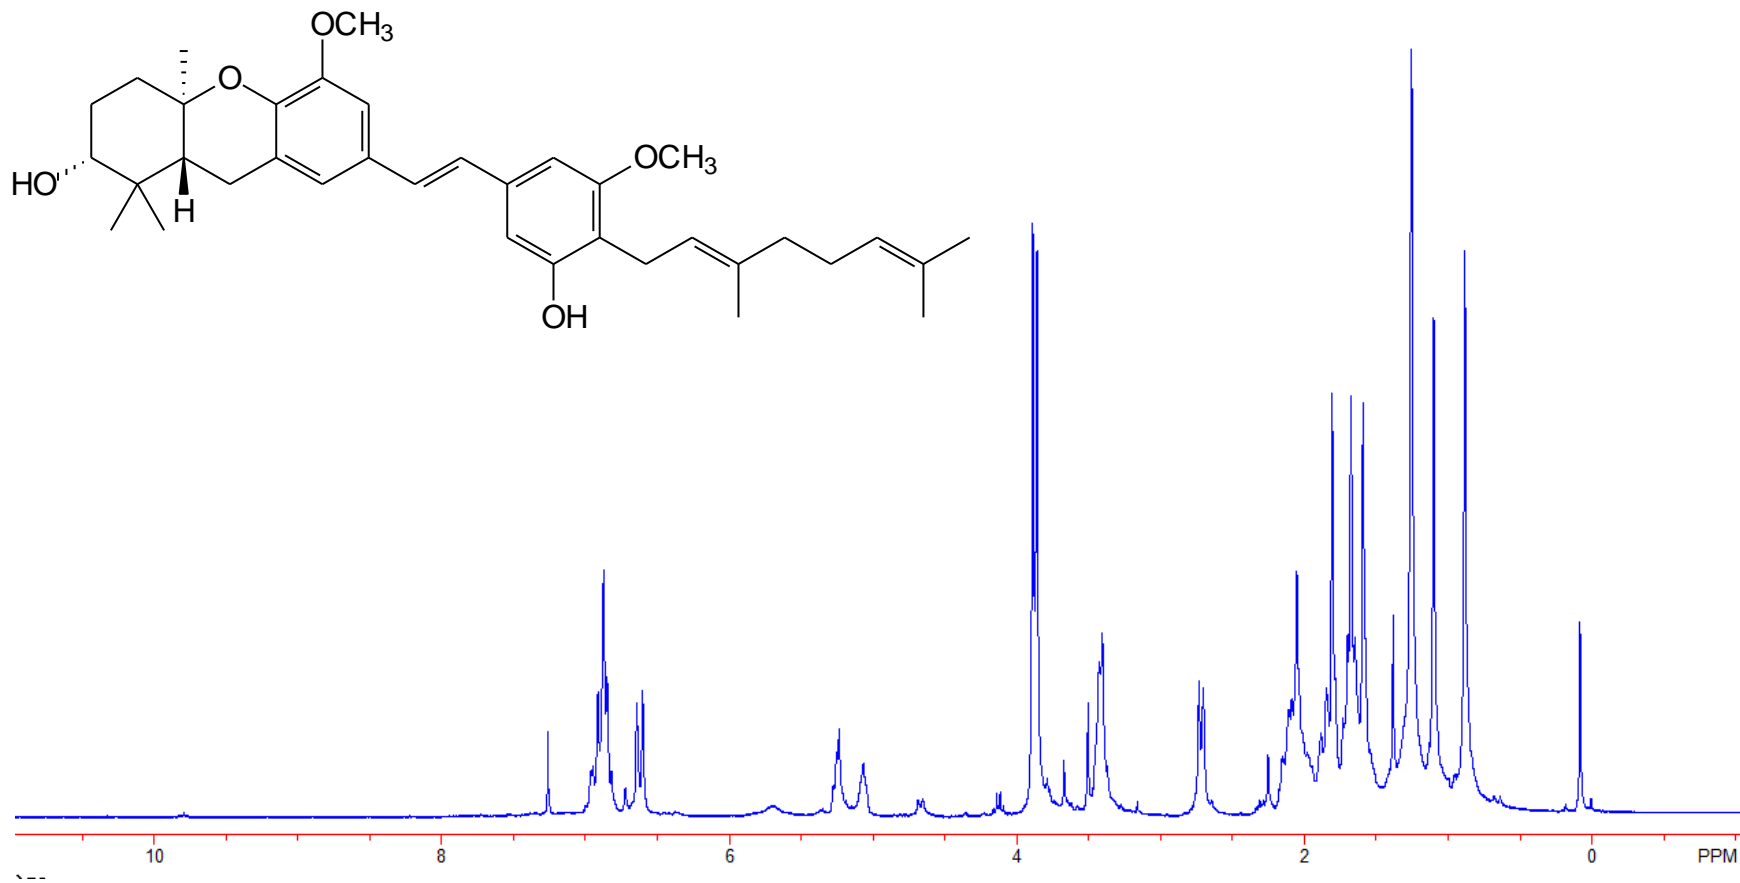

300 MHz  $^1\text{H}$  NMR Spectrum of Compound 57

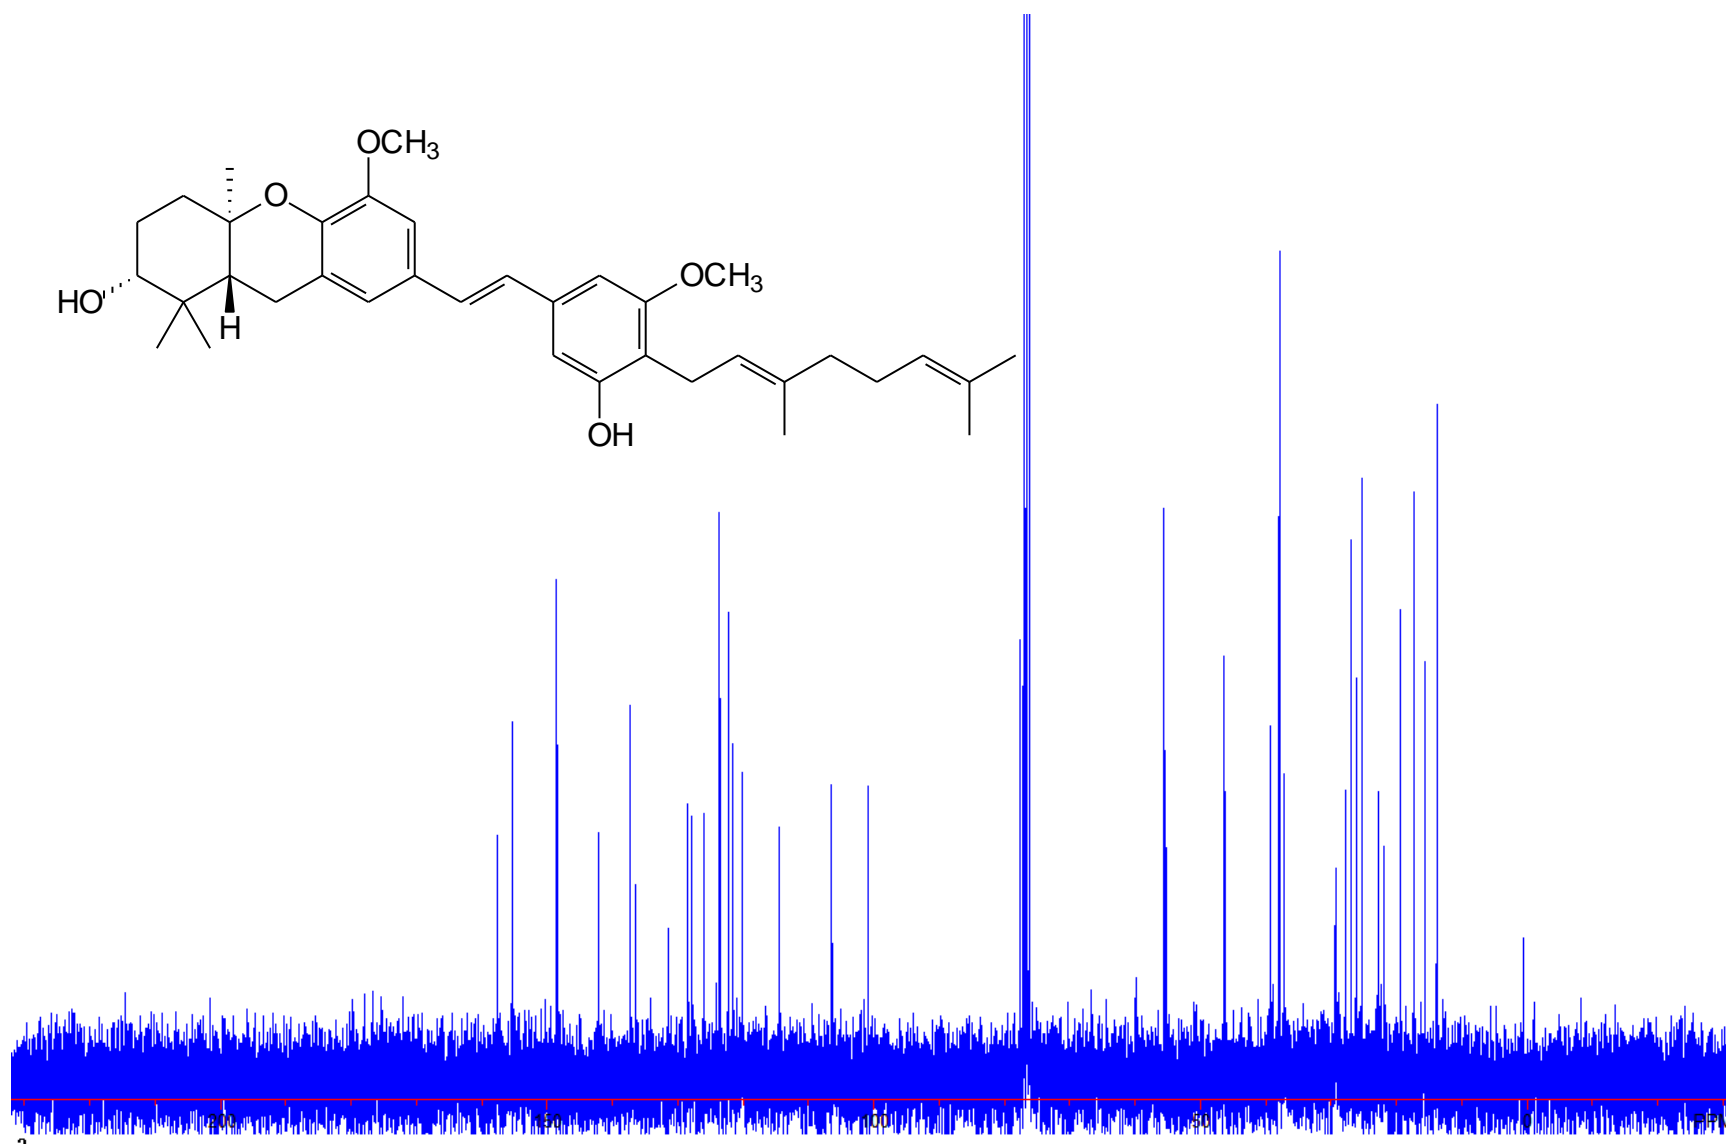

75 MHz <sup>13</sup>C NMR Spectrum of Compound 57

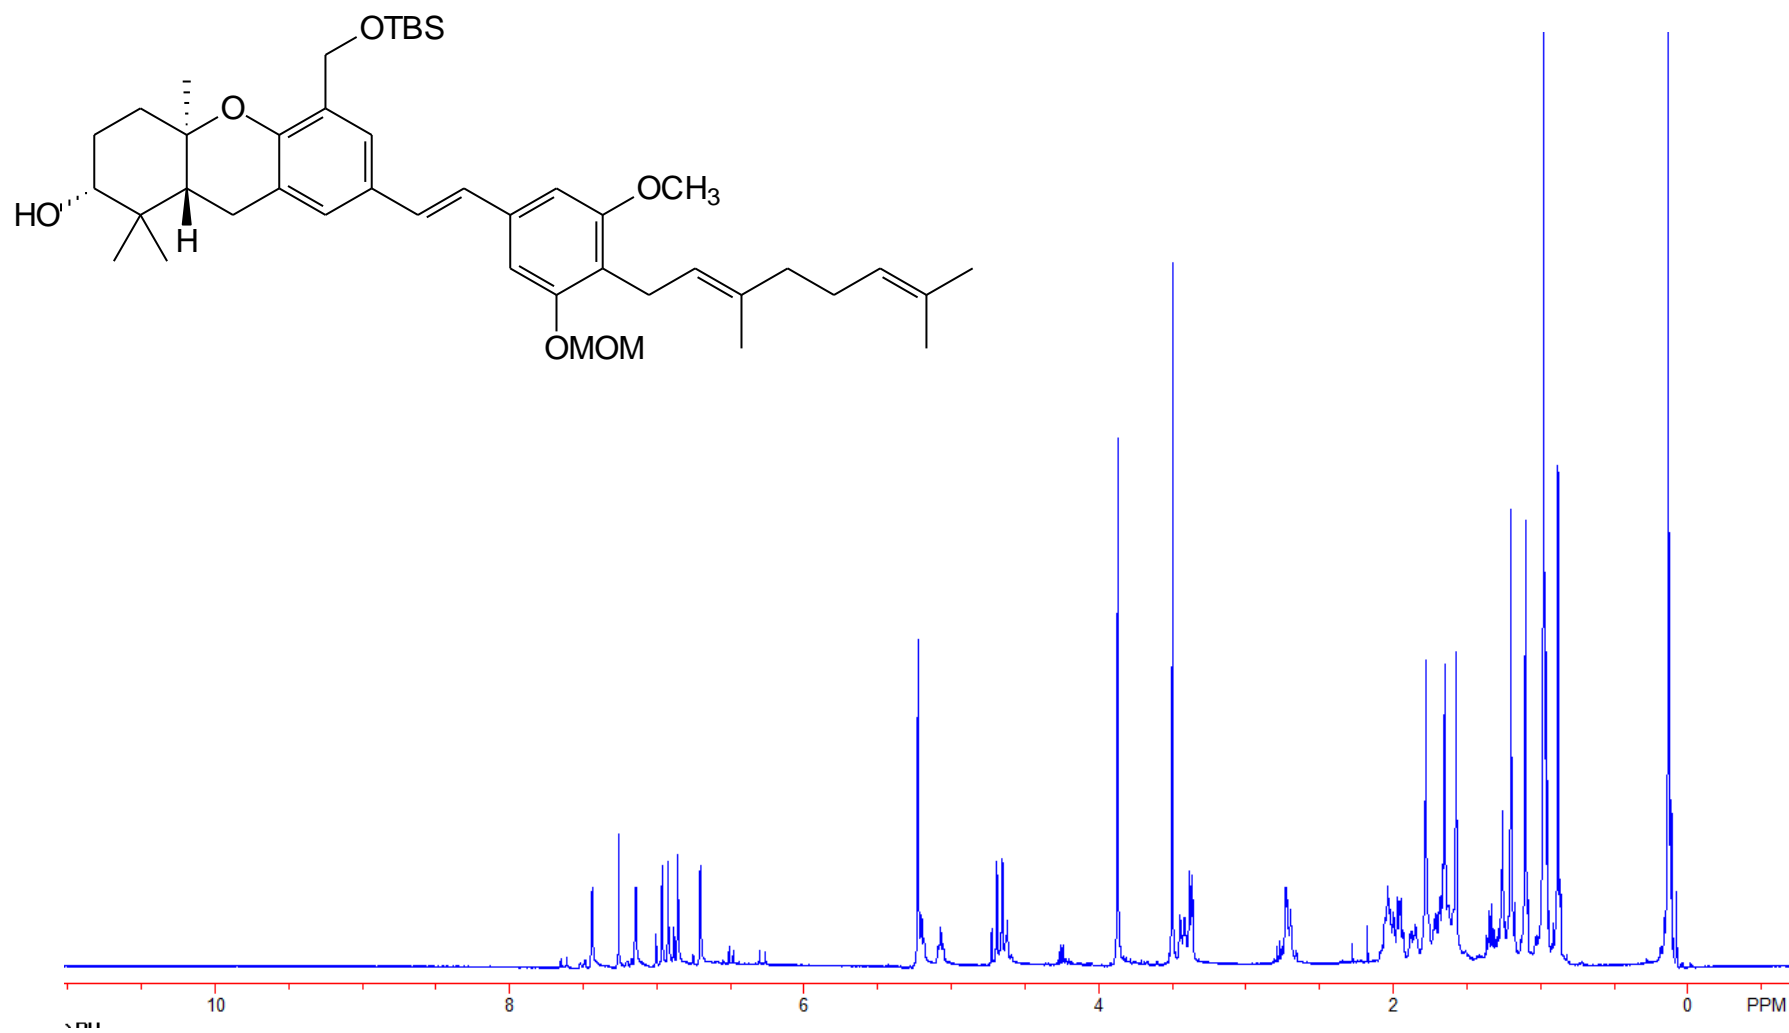

400 MHz <sup>1</sup>H NMR Spectrum of Compound **50**

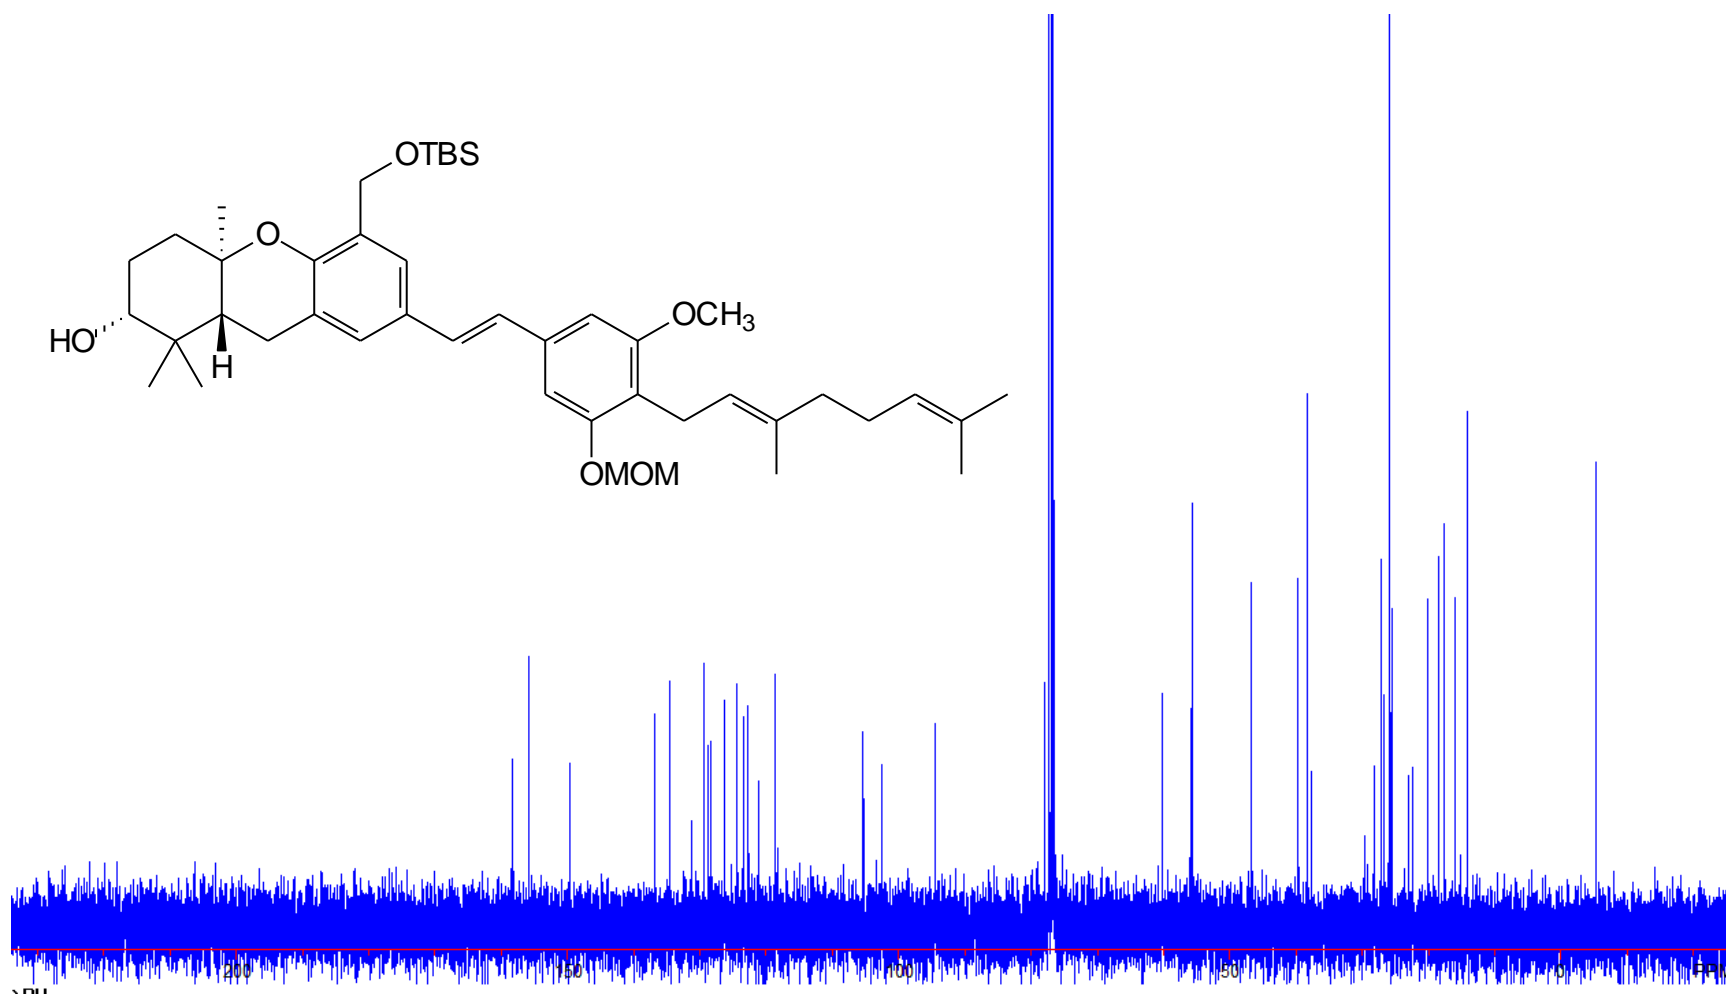

100 MHz <sup>13</sup>C NMR Spectrum of Compound **50**

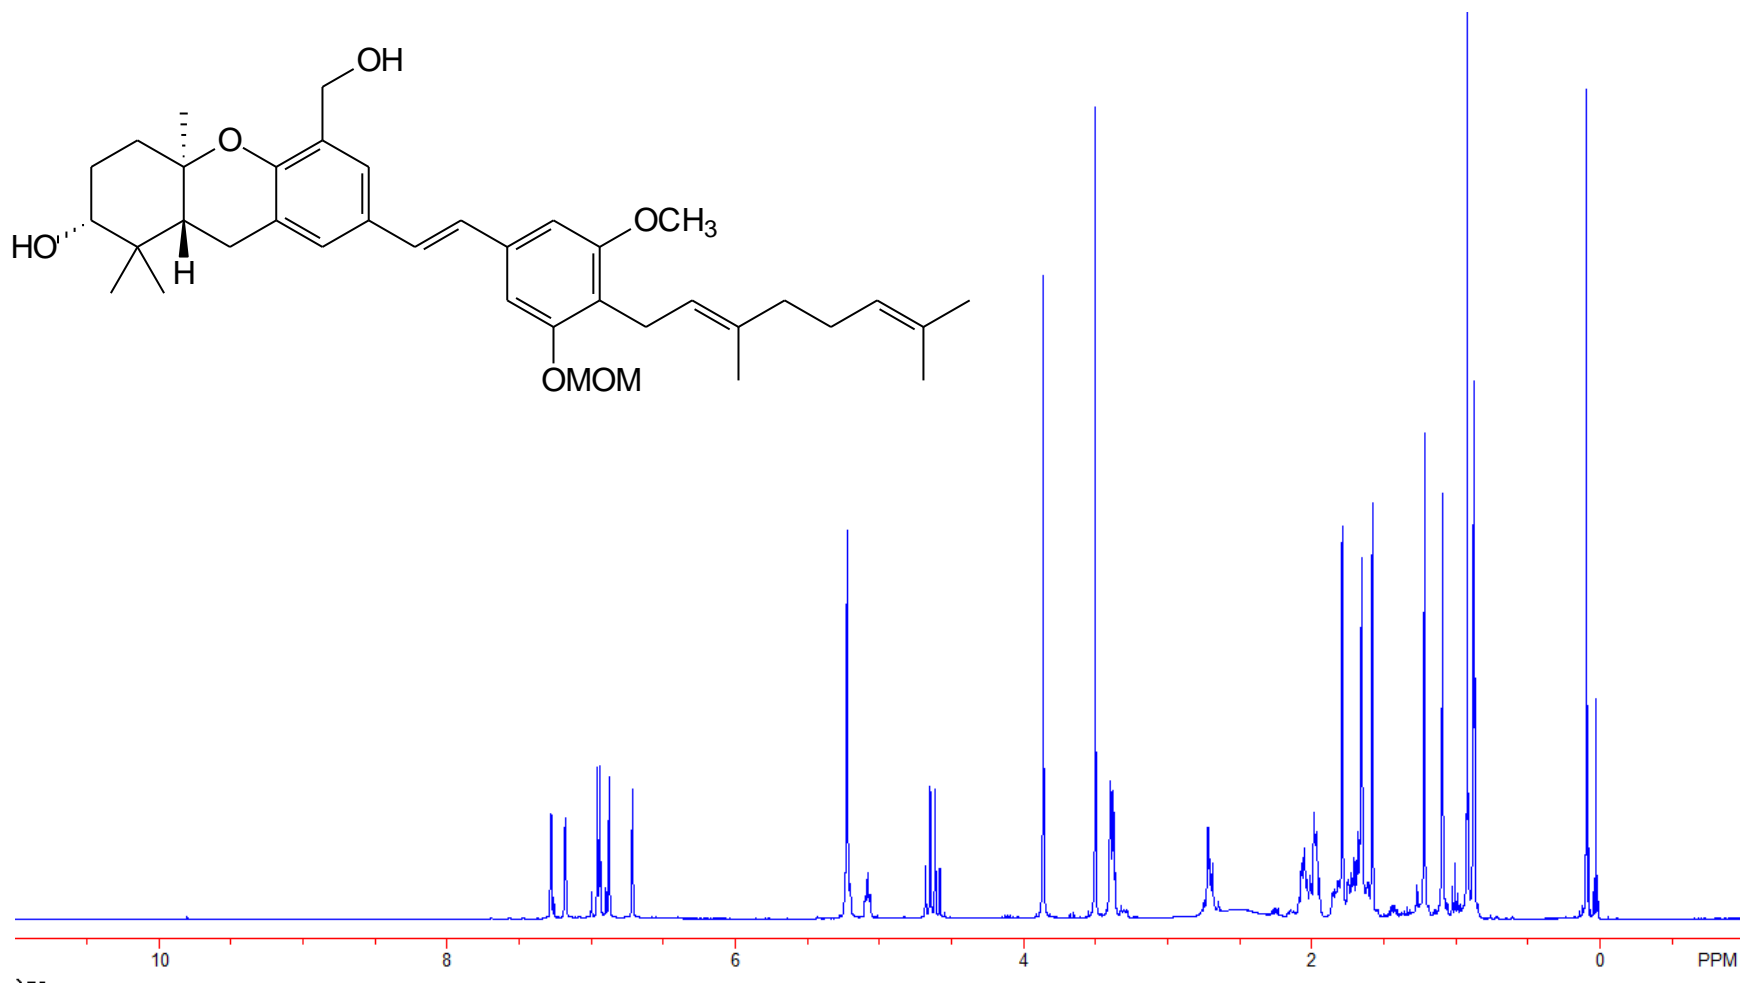

400 MHz  $^1\text{H}$  NMR Spectrum of Compound 58



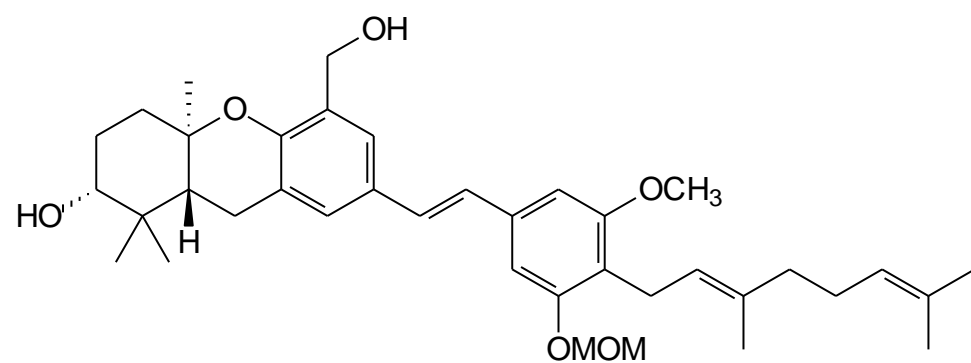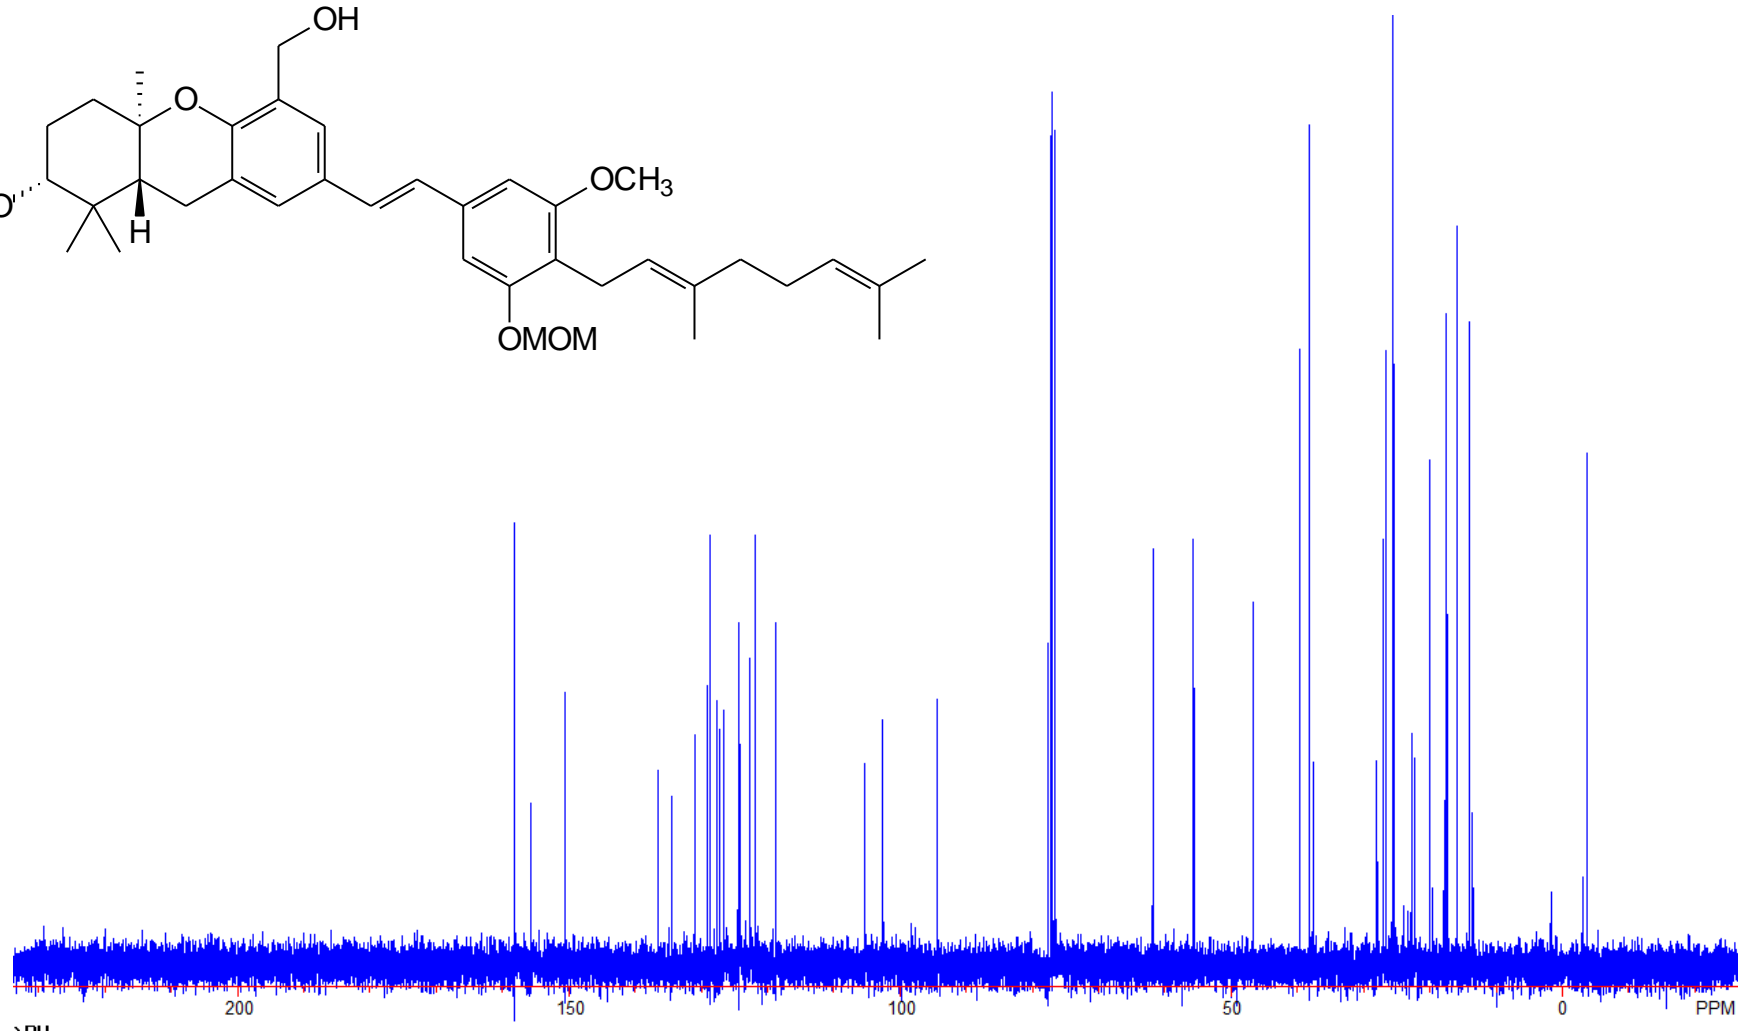

100 MHz  $^{13}\text{C}$  NMR Spectrum of Compound 58

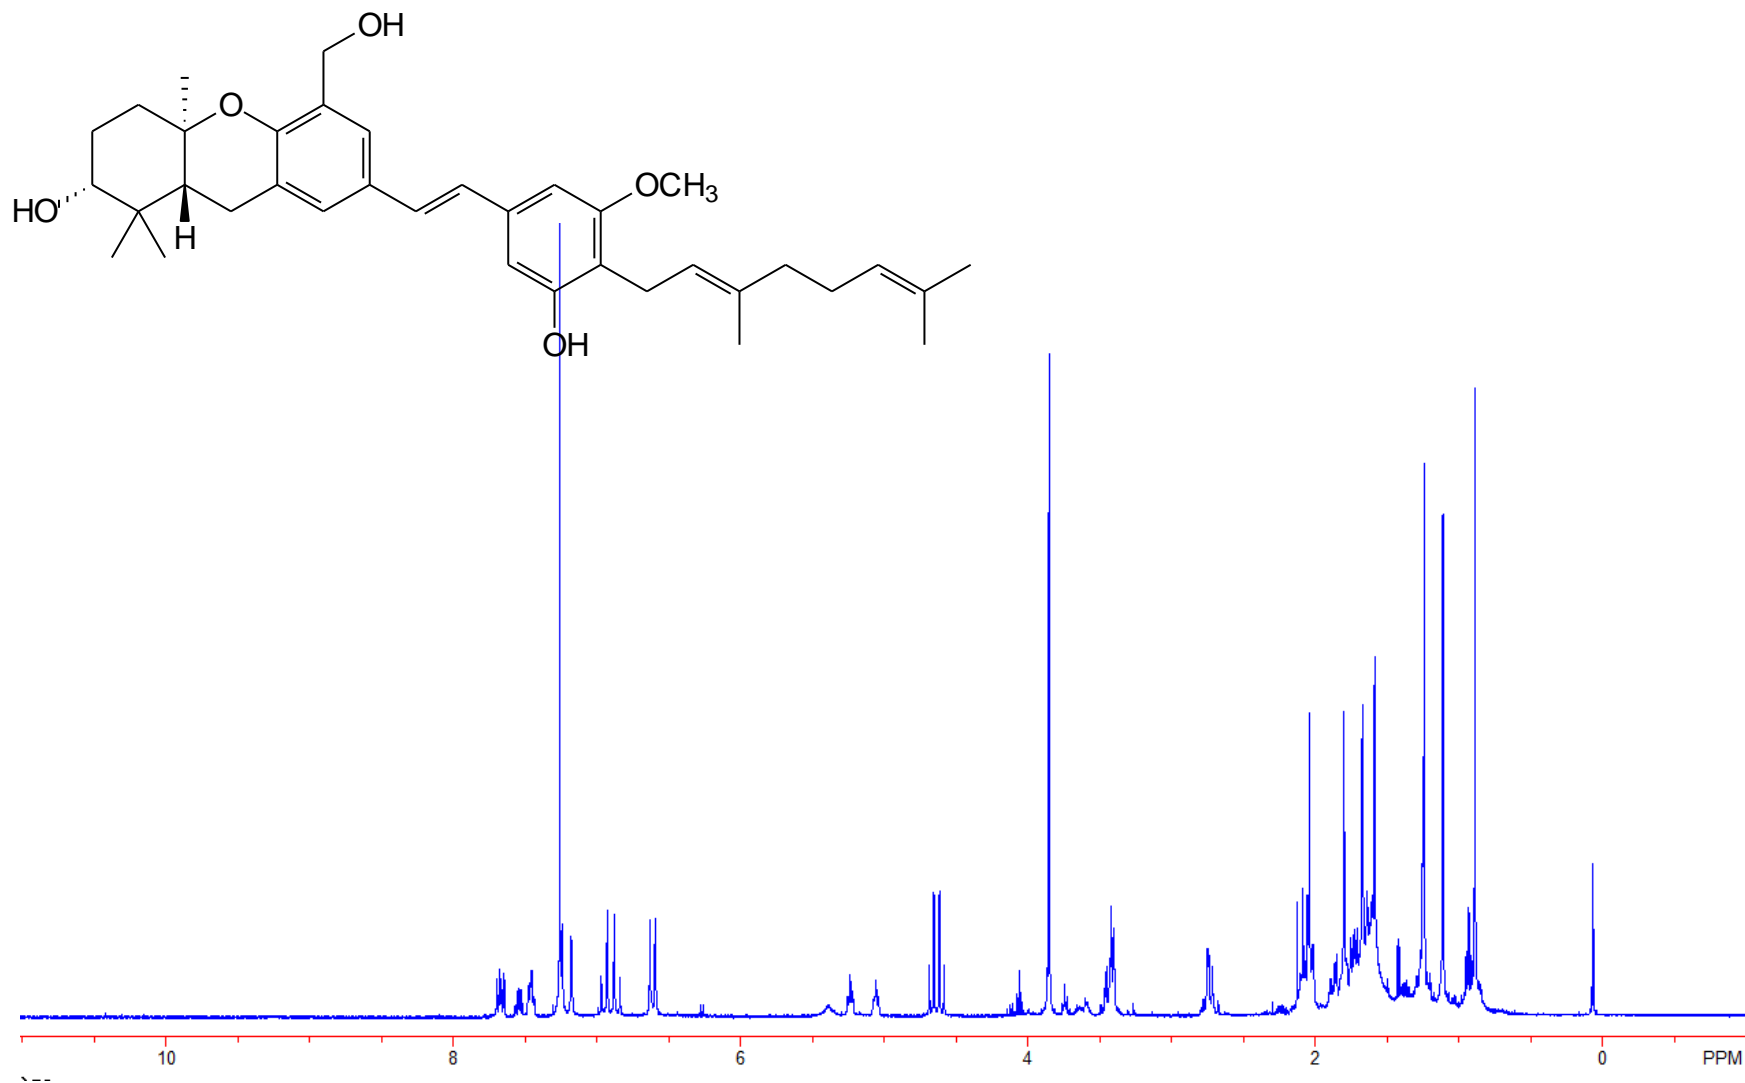

400 MHz <sup>1</sup>H NMR Spectrum of Compound **59**

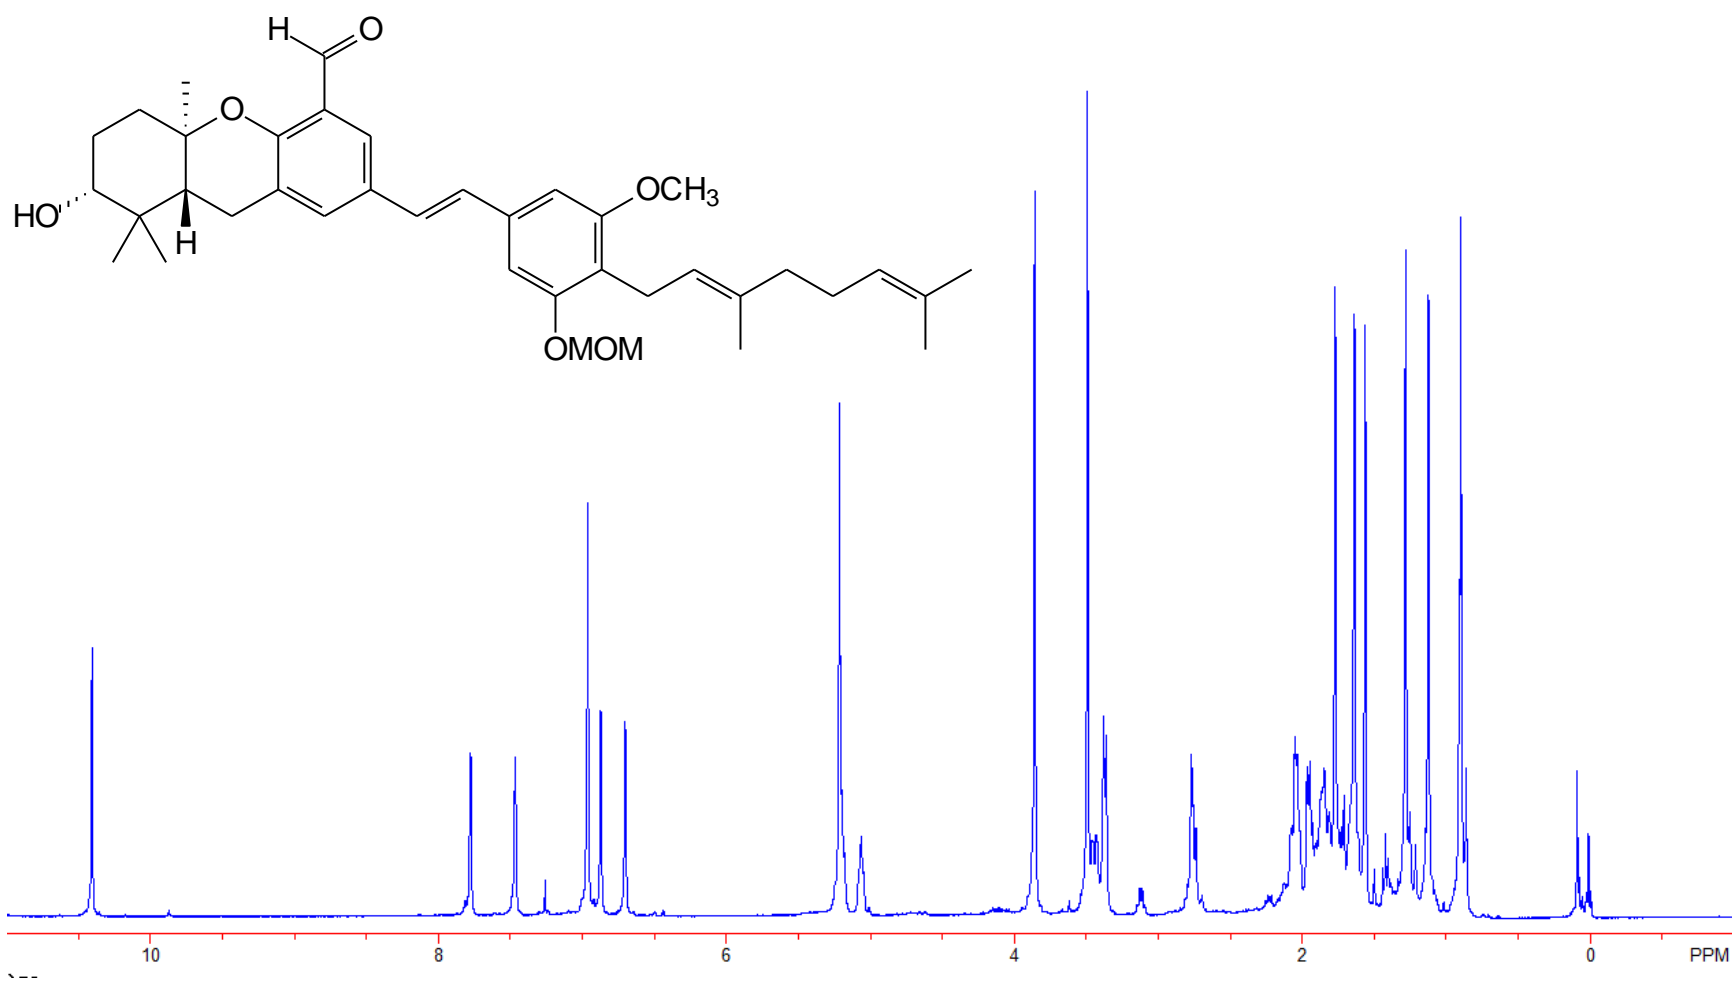

400 MHz <sup>1</sup>H NMR Spectrum of Compound **60**

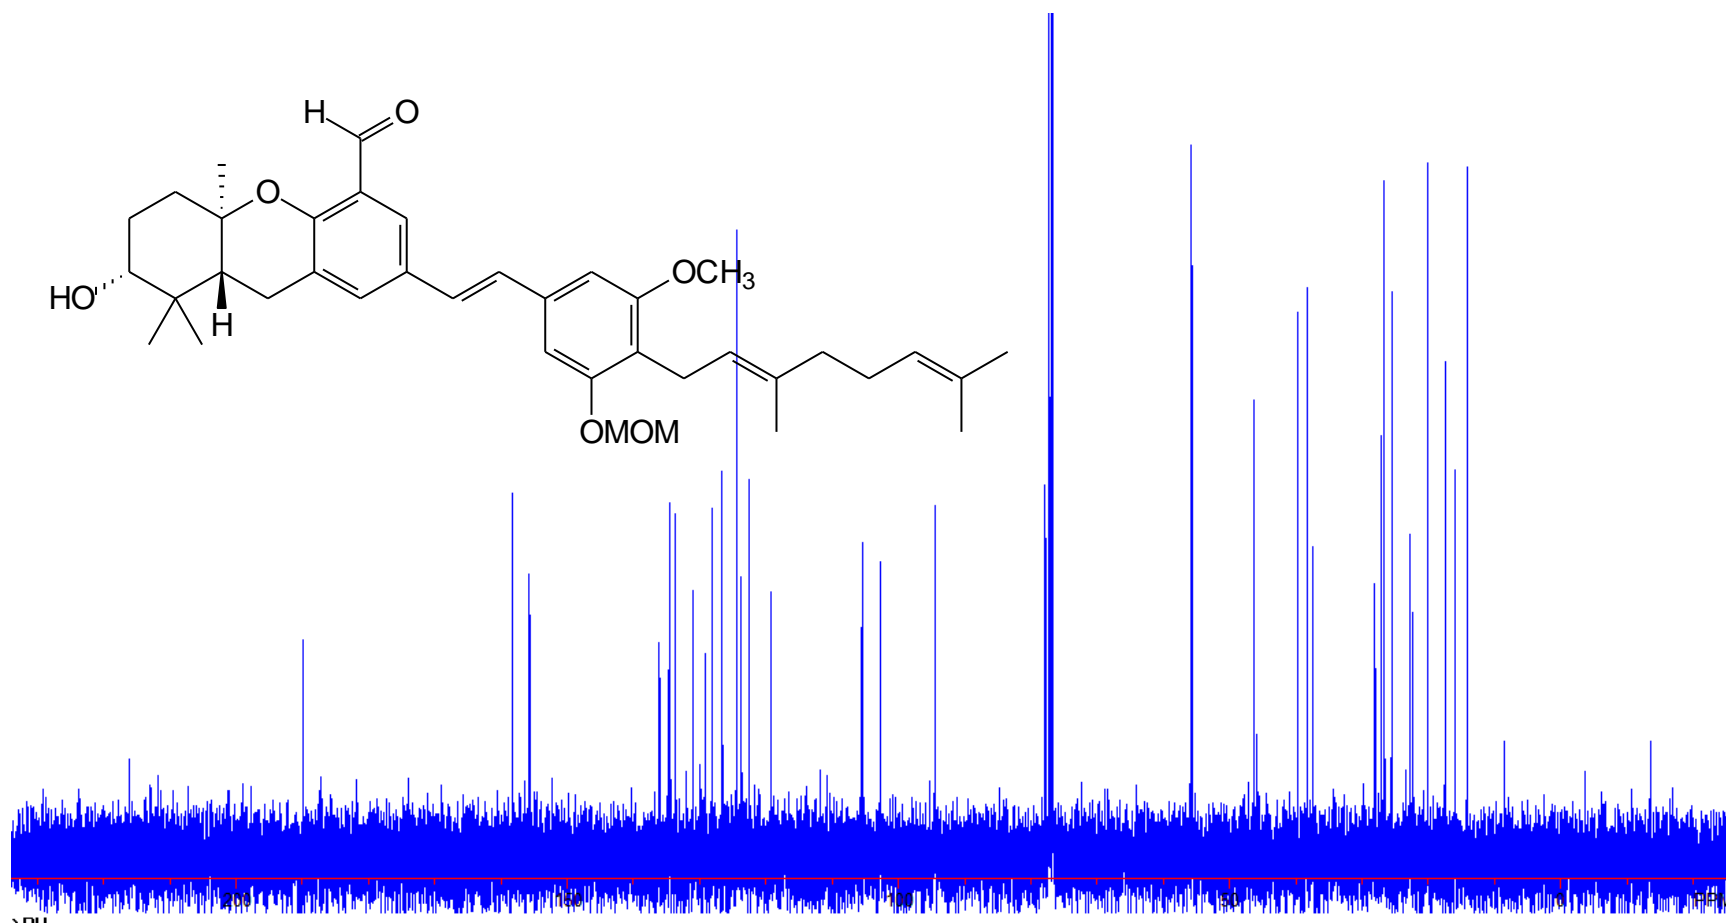

100 MHz  $^{13}\text{C}$  NMR Spectrum of Compound **60**

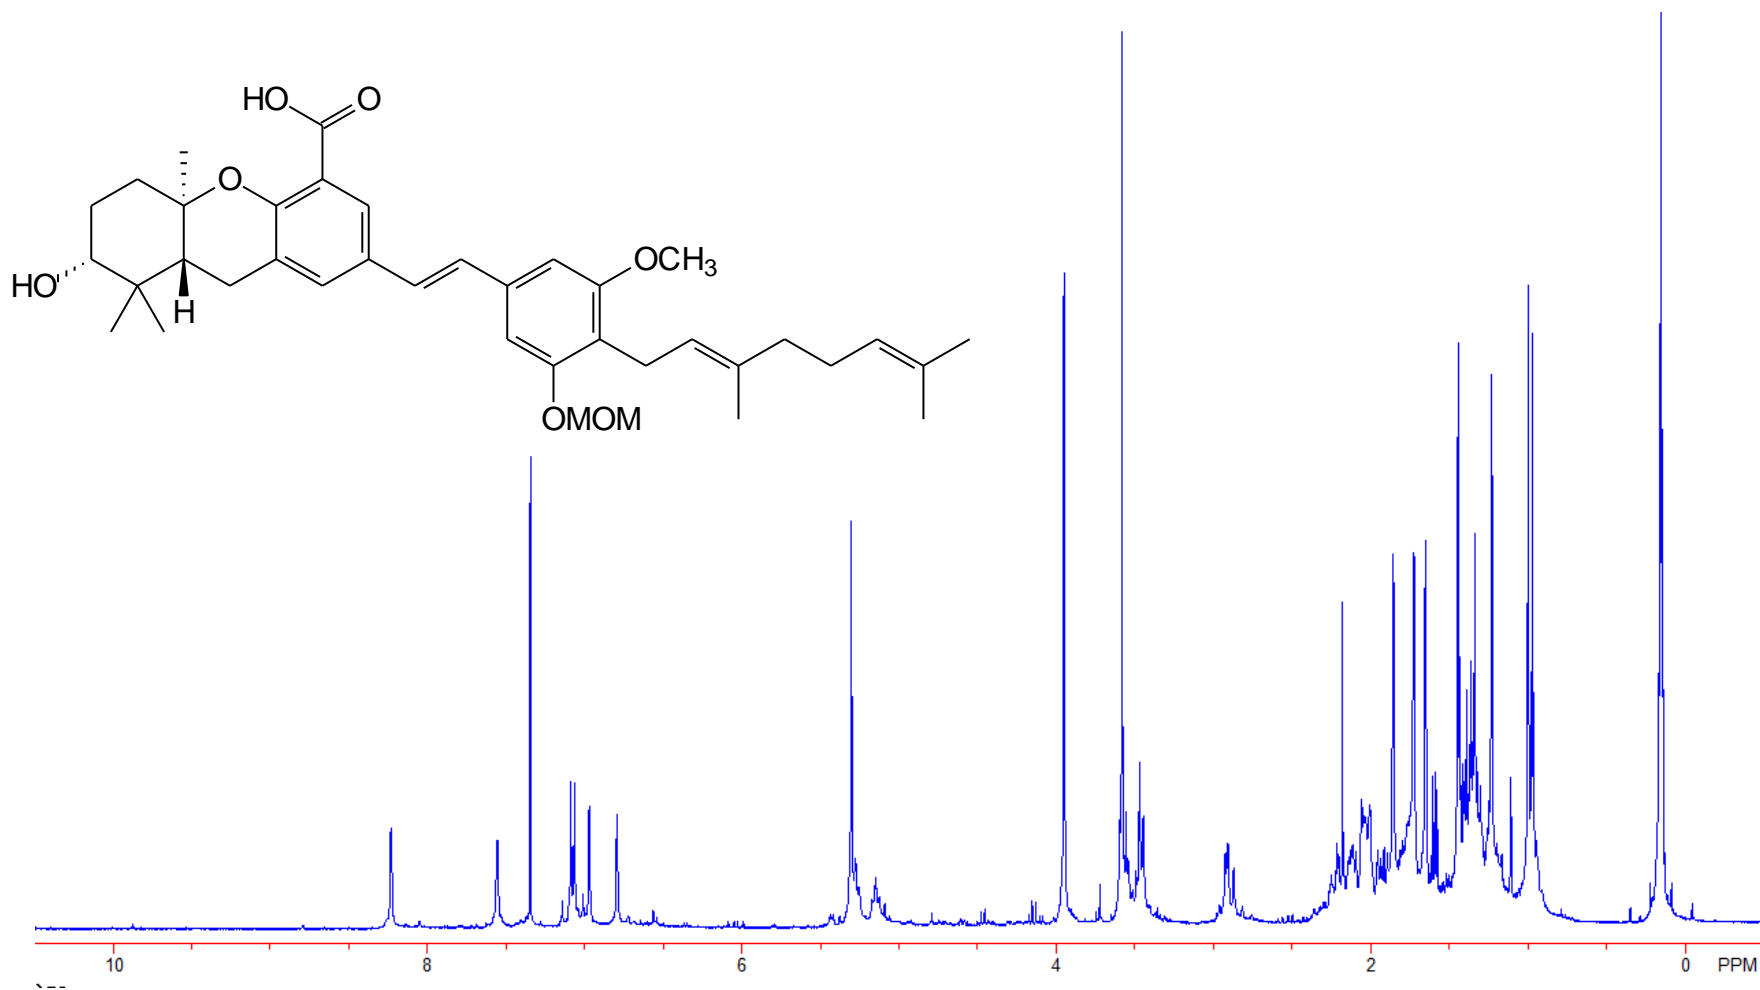

400 MHz <sup>1</sup>H NMR Spectrum of Compound **61**

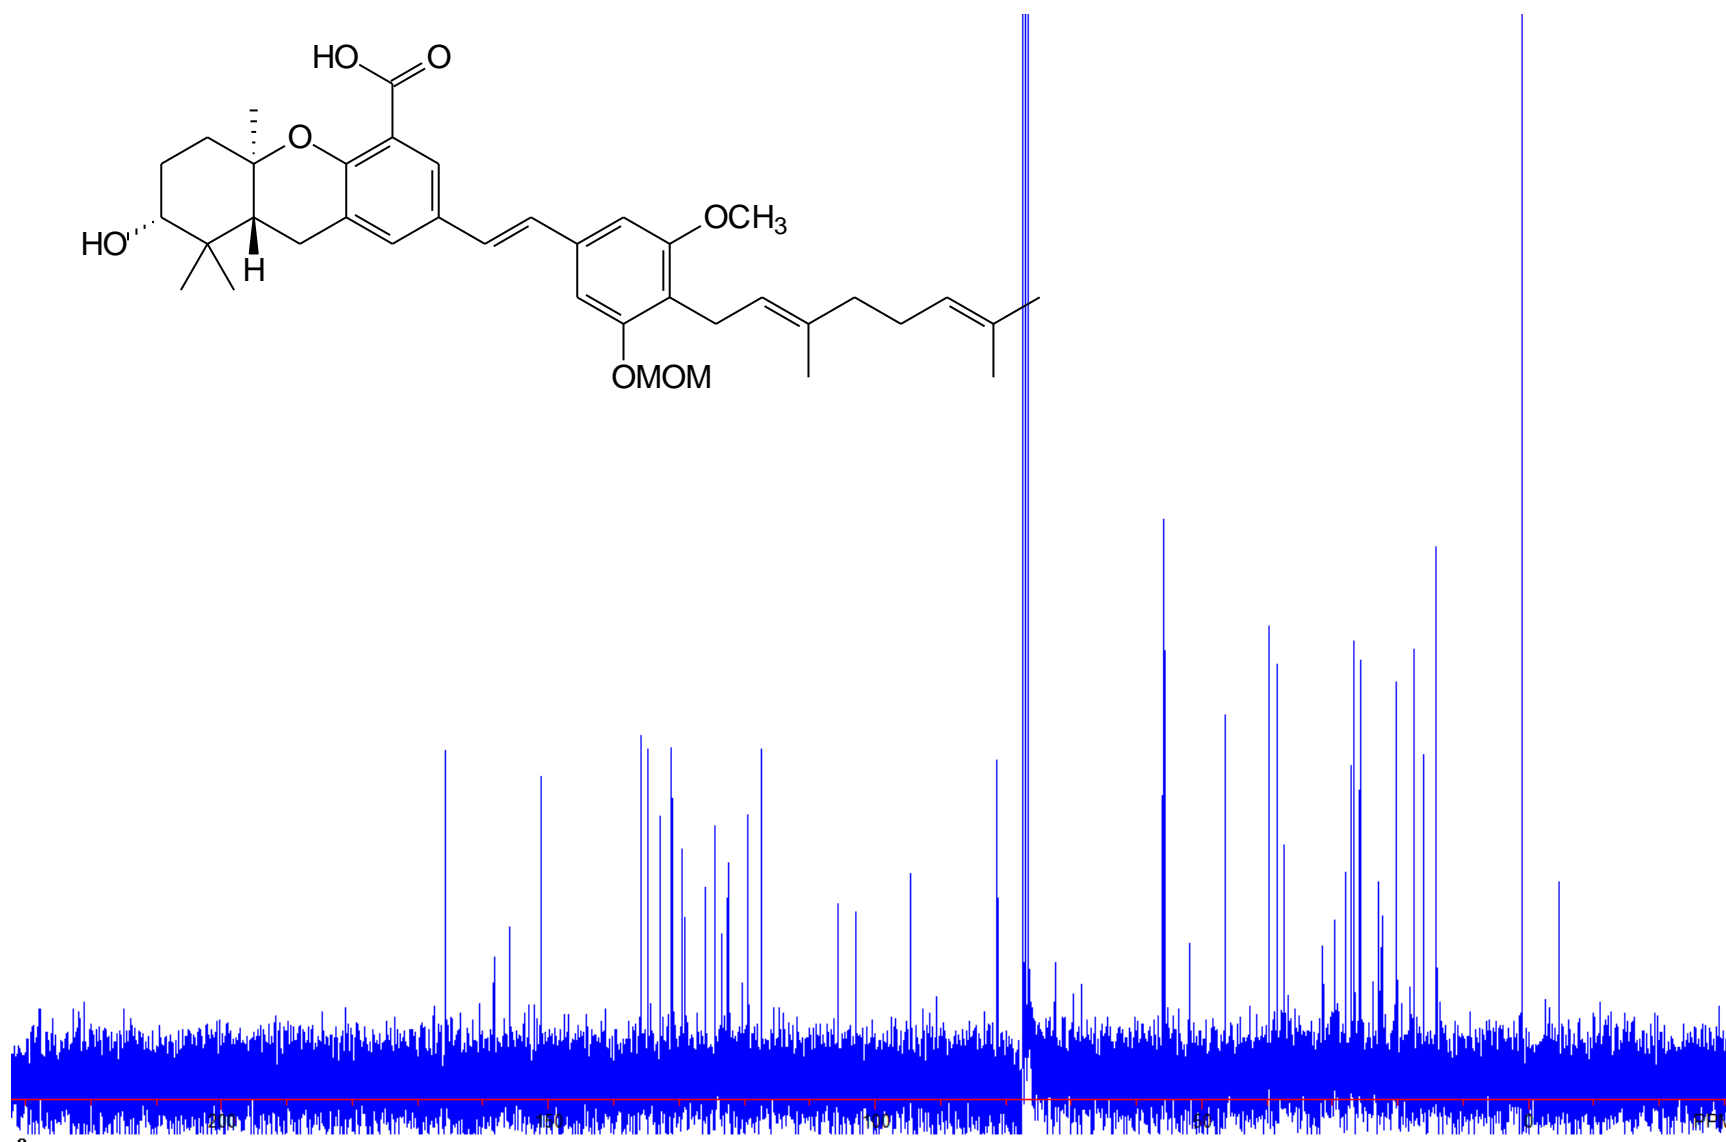

100 MHz  $^{13}\text{C}$  NMR Spectrum of Compound 61

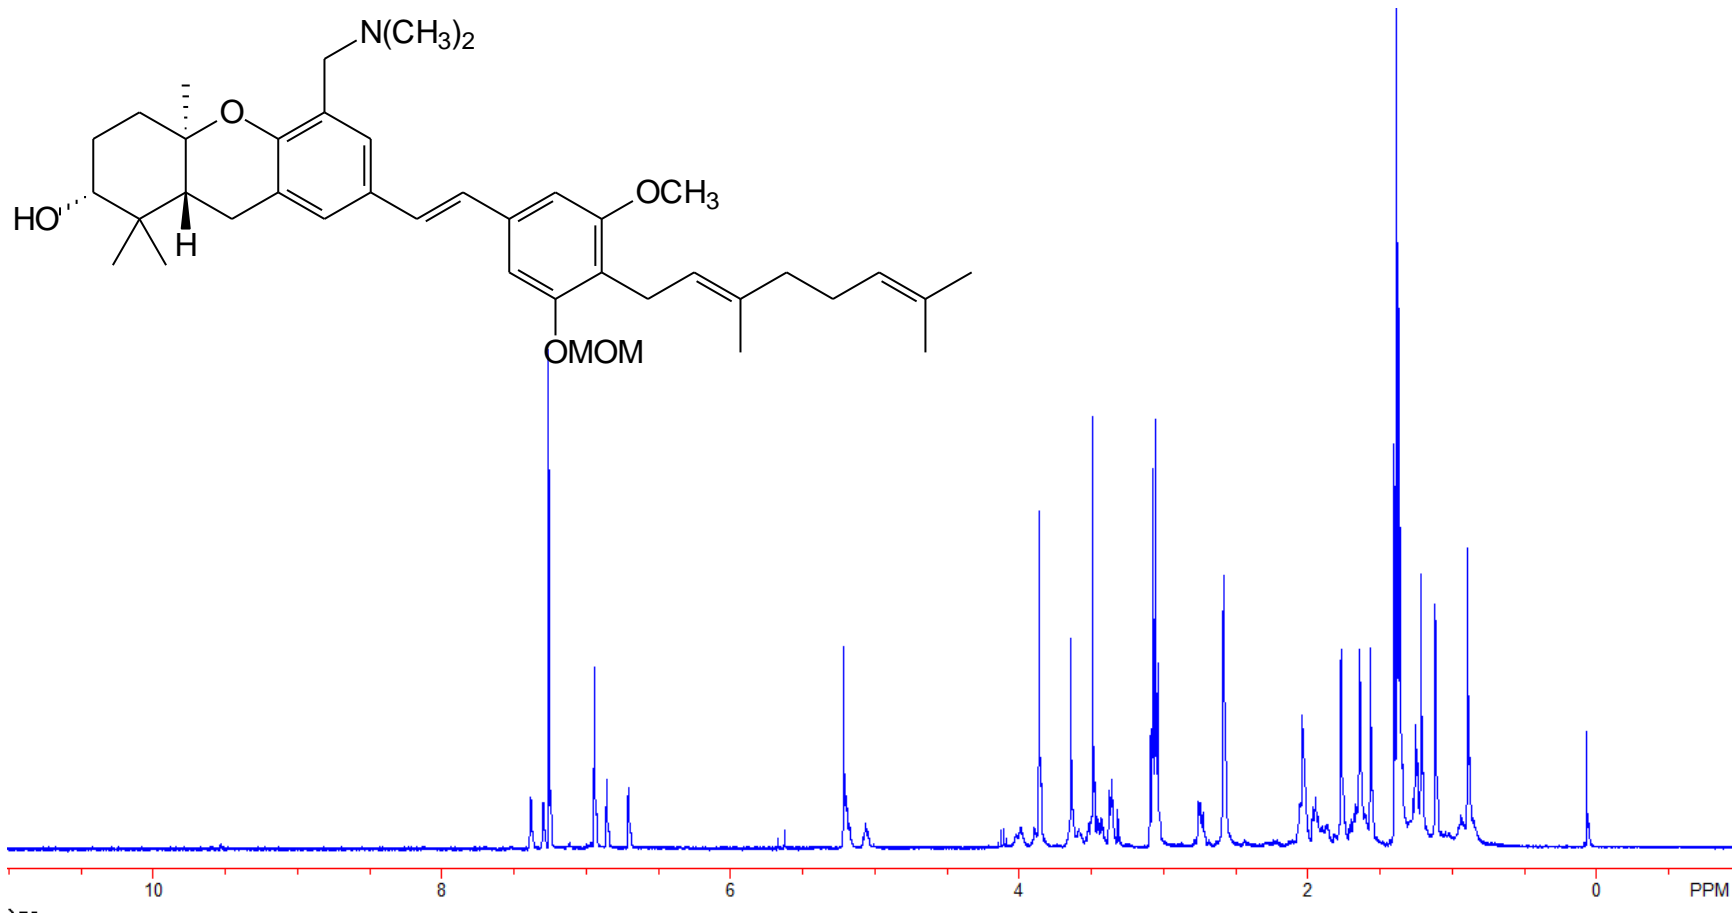

400 MHz  $^1\text{H}$  NMR Spectrum of Compound **62**

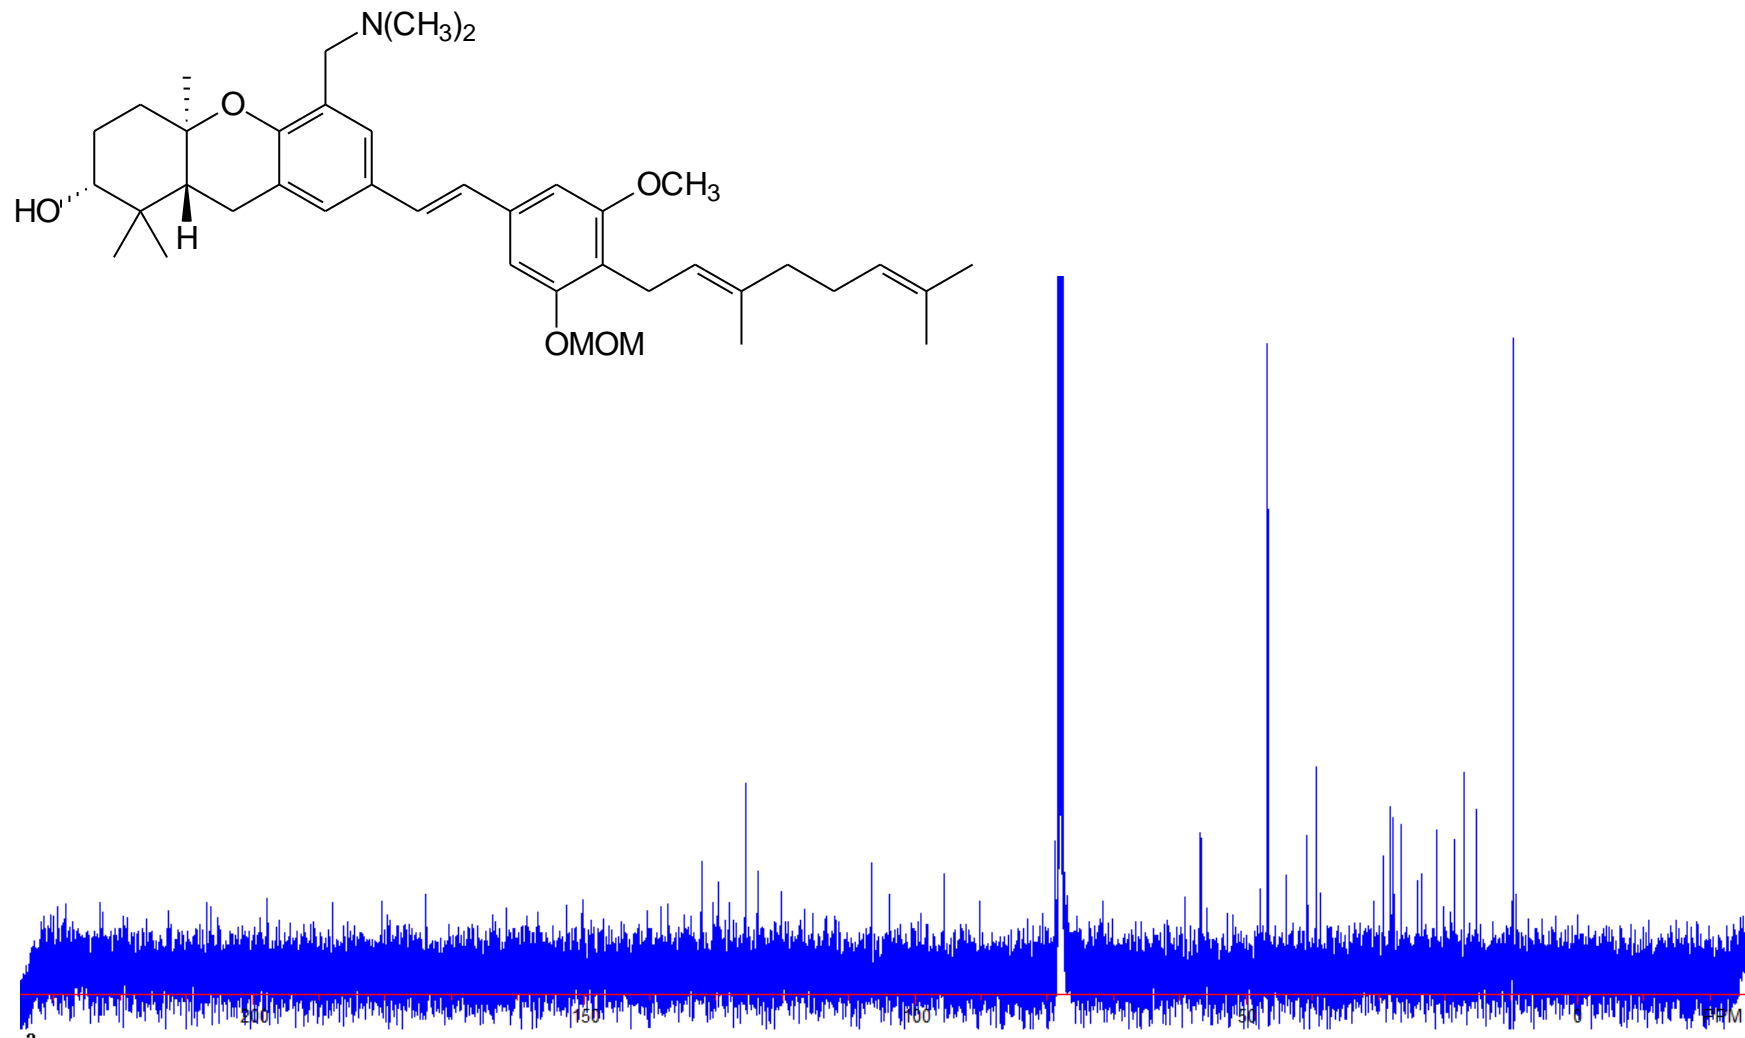

100 MHz  $^{13}\text{C}$  NMR Spectrum of Compound 62



# Developmental Therapeutics Program

NSC: D-750922 / 1

Conc: 1.00E-5 Molar

Test Date: Aug 17, 2009

## One Dose Bar Graph

Experiment ID: 0908OS22

Report Date: Jul 28, 2011

Panel/Cell Line

Growth Percent

Bar Graph

Compound 52

**Leukemia**

|           |       |
|-----------|-------|
| CCRF-CEM  | 85.33 |
| HL-60(TB) | 69.66 |
| K-562     | 79.94 |
| MOLT-4    | 74.10 |
| RPMI-8226 | 75.01 |

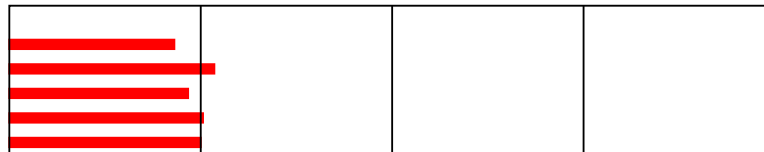

**Non-Small Cell Lung Cancer**

|           |        |
|-----------|--------|
| A549/ATCC | 94.65  |
| EKVX      | 107.15 |
| HOP-62    | 113.14 |
| HOP-92    | 126.63 |
| NCI-H226  | 116.82 |
| NCI-H23   | 102.66 |
| NCI-H322M | 102.34 |
| NCI-H460  | 107.68 |
| NCI-H522  | 81.49  |

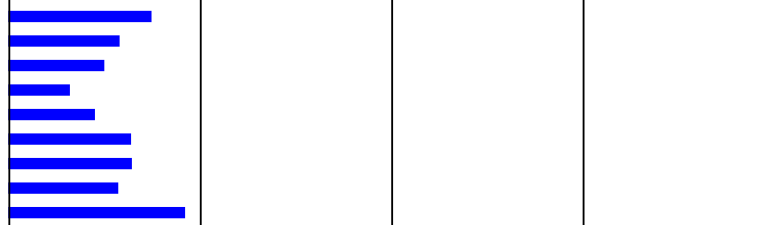

**Colon Cancer**

|          |        |
|----------|--------|
| COLO 205 | 126.18 |
| HCC-2998 | 103.41 |
| HCT-116  | 84.53  |
| HCT-15   | 96.14  |
| HT29     | 74.54  |
| KM12     | 97.28  |
| SW-620   | 118.97 |

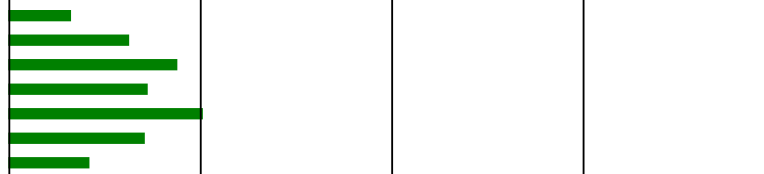

**CNS Cancer**

|        |        |
|--------|--------|
| SF-268 | 88.46  |
| SF-295 | 108.87 |
| SF-539 | 91.23  |
| SNB-19 | 106.40 |
| SNB-75 | 91.21  |
| U251   | 86.35  |

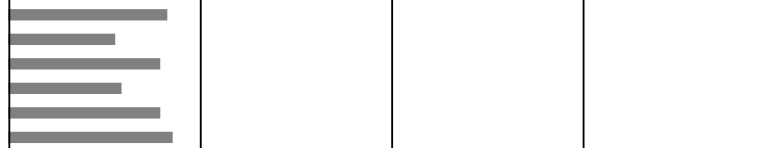

**Melanoma**

|            |        |
|------------|--------|
| LOX IMVI   | 104.65 |
| MALME-3M   | 114.96 |
| M14        | 106.89 |
| MDA-MB-435 | 108.97 |
| SK-MEL-2   | 112.26 |
| SK-MEL-28  | 105.71 |
| SK-MEL-5   | 99.33  |
| UACC-257   | 100.05 |
| UACC-62    | 104.40 |

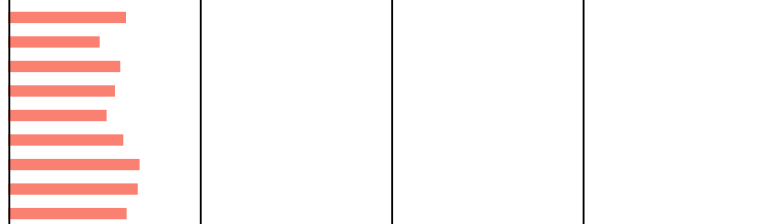

**Ovarian Cancer**

|             |        |
|-------------|--------|
| IGROV1      | 63.12  |
| OVCAR-3     | 88.21  |
| OVCAR-4     | 109.83 |
| OVCAR-5     | 104.55 |
| OVCAR-8     | 108.28 |
| NCI/ADR-RES | 104.68 |
| SK-OV-3     | 115.67 |

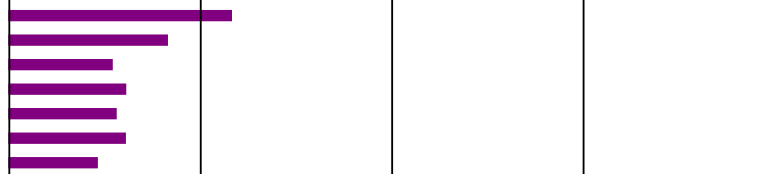

**Renal Cancer**

|         |        |
|---------|--------|
| 786-0   | 95.95  |
| A498    | 94.70  |
| ACHN    | 103.84 |
| CAKI-1  | 106.80 |
| RXF 393 | 80.69  |
| SN12C   | 101.27 |
| TK-10   | 112.79 |
| UO-31   | 91.04  |

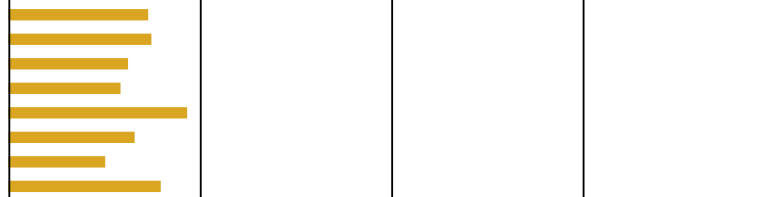

**Prostate Cancer**

|        |       |
|--------|-------|
| PC-3   | 87.56 |
| DU-145 | 91.34 |

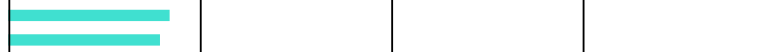

**Breast Cancer**

|                 |        |
|-----------------|--------|
| MCF7            | 102.22 |
| MDA-MB-231/ATCC | 96.59  |
| HS 578T         | 64.30  |
| BT-549          | 107.66 |
| T-47D           | 109.42 |
| MDA-MB-468      | 109.70 |

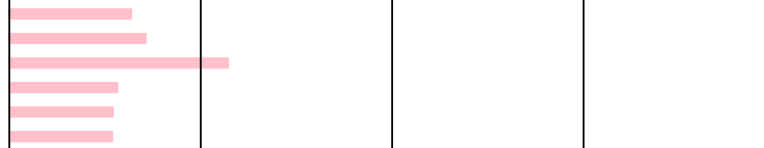

150 75 0.0 -75 -150  
S89 Percentage Growth

# Developmental Therapeutics Program

NSC: D-750922 / 1

Conc: 1.00E-5 Molar

Test Date: Aug 17, 2009

## One Dose Mean Graph

Experiment ID: 0908OS22

Report Date: Jul 28, 2011

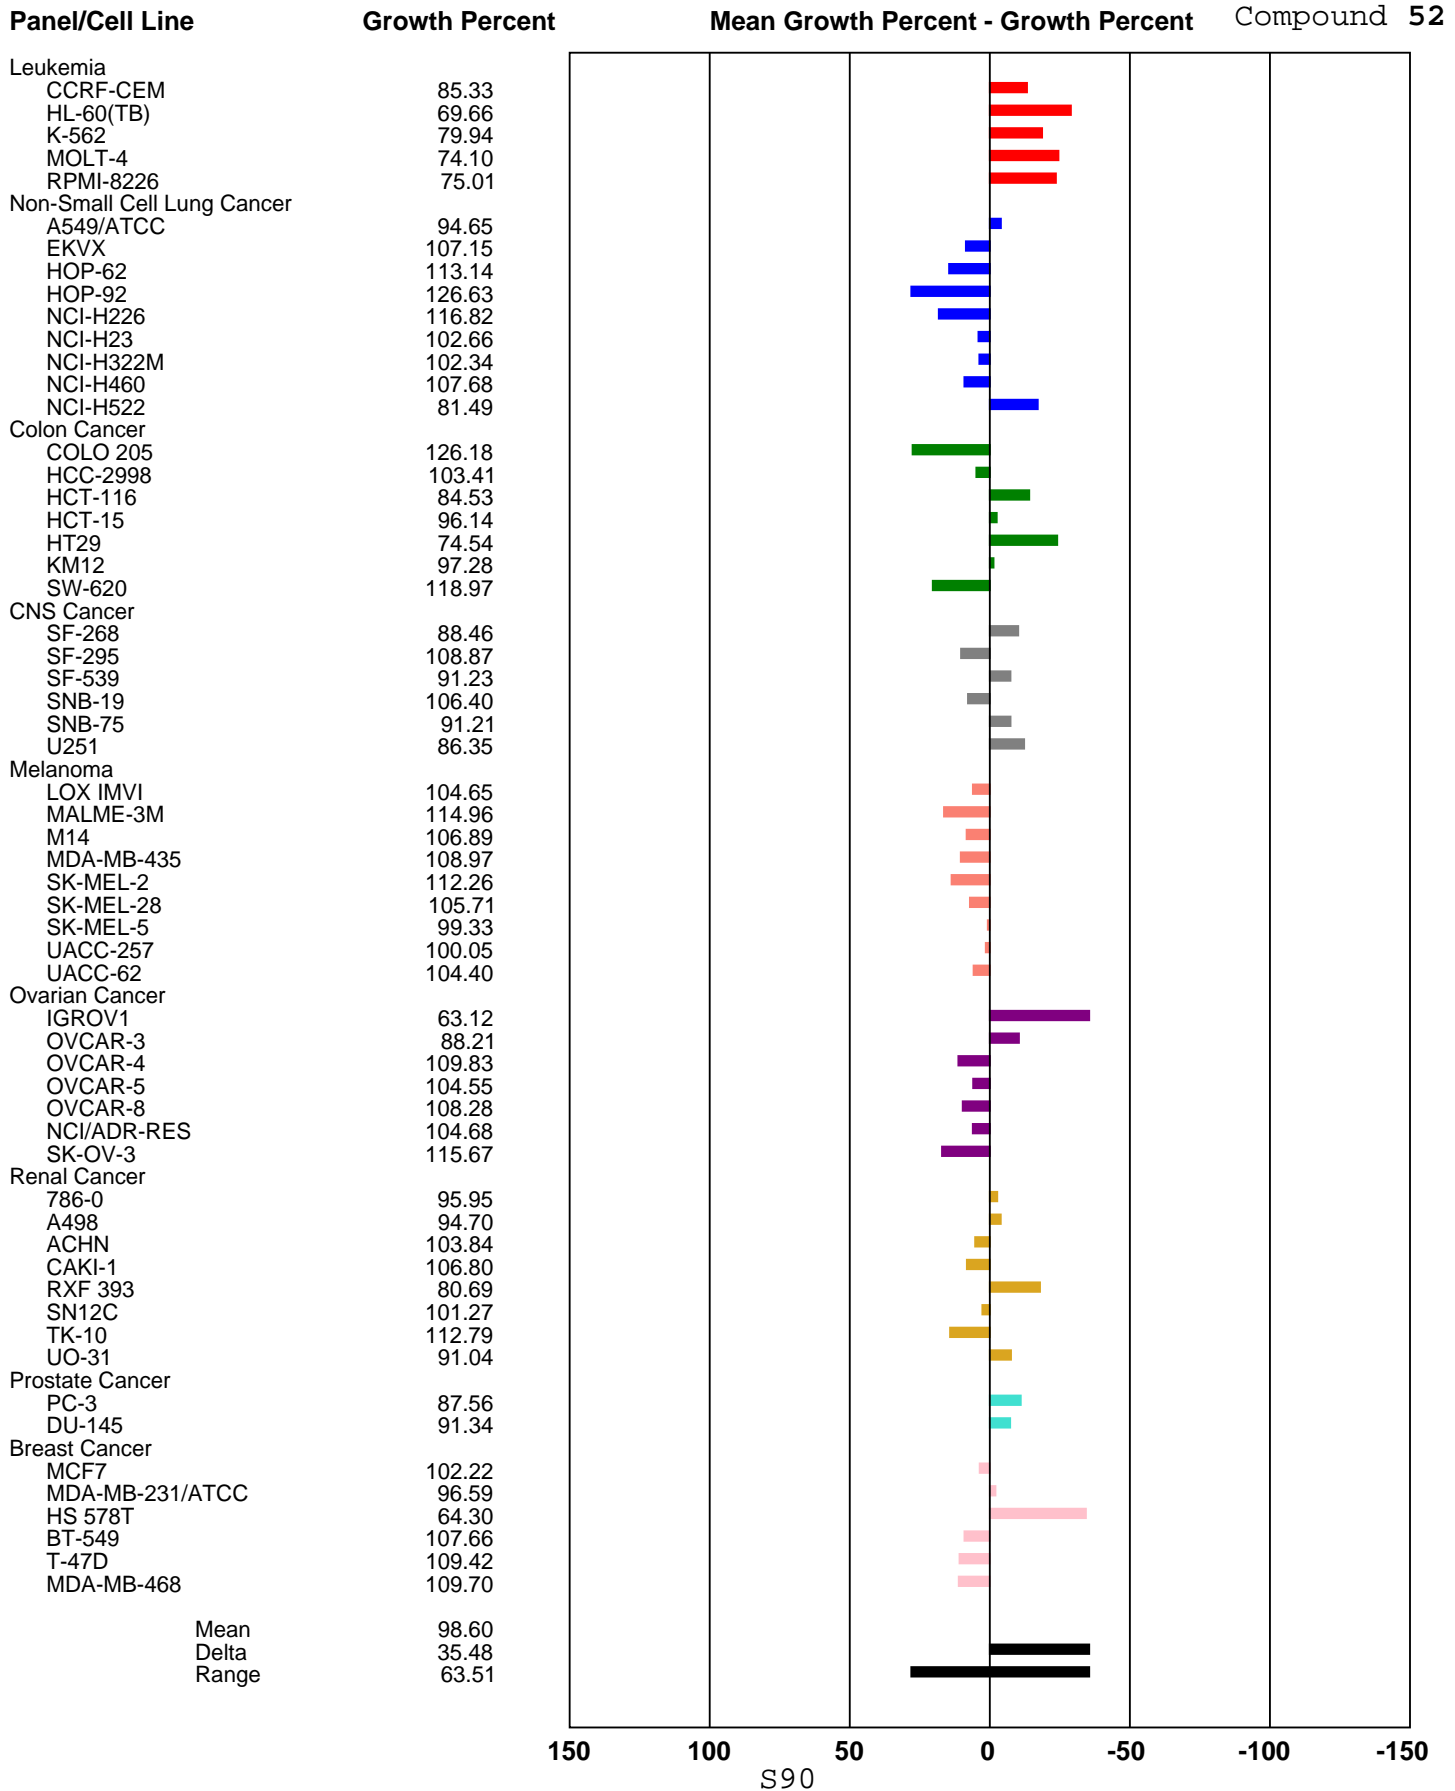

S90

# Developmental Therapeutics Program

NSC: D-750921 / 1

Conc: 1.00E-5 Molar

Test Date: Aug 17, 2009

## One Dose Bar Graph

Experiment ID: 0908OS22

Report Date: Jul 28, 2011

Panel/Cell Line

Growth Percent

Bar Graph

Compound 55

**Leukemia**

|           |       |
|-----------|-------|
| CCRF-CEM  | 81.90 |
| HL-60(TB) | 78.18 |
| K-562     | 72.03 |
| MOLT-4    | 70.39 |
| RPMI-8226 | 65.86 |

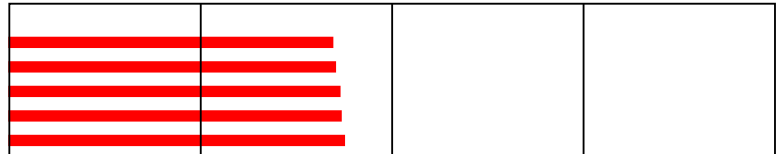

**Non-Small Cell Lung Cancer**

|           |        |
|-----------|--------|
| A549/ATCC | 104.30 |
| EKVX      | 118.02 |
| HOP-62    | 127.12 |
| HOP-92    | 107.98 |
| NCI-H226  | 120.47 |
| NCI-H23   | 100.29 |
| NCI-H322M | 167.25 |
| NCI-H460  | 105.49 |
| NCI-H522  | 72.23  |

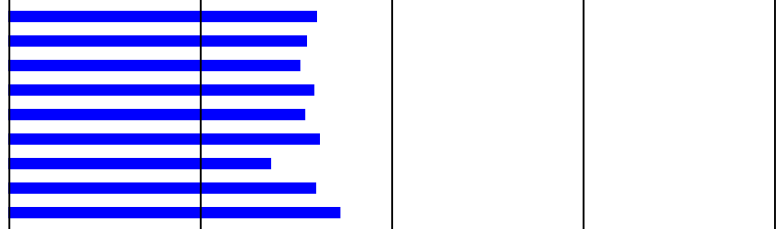

**Colon Cancer**

|          |        |
|----------|--------|
| COLO 205 | 130.43 |
| HCC-2998 | 99.34  |
| HCT-116  | 68.50  |
| HCT-15   | 84.21  |
| HT29     | 47.92  |
| KM12     | 123.20 |
| SW-620   | 128.51 |

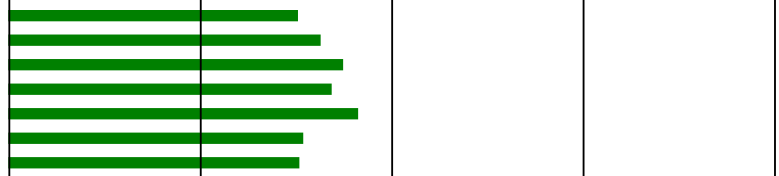

**CNS Cancer**

|        |        |
|--------|--------|
| SF-268 | 97.11  |
| SF-295 | 132.96 |
| SF-539 | 89.93  |
| SNB-19 | 96.37  |
| SNB-75 | 84.18  |
| U251   | 83.64  |

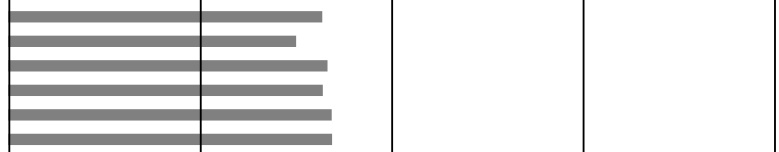

**Melanoma**

|            |        |
|------------|--------|
| LOX IMVI   | 92.67  |
| MALME-3M   | 519.50 |
| M14        | 116.63 |
| MDA-MB-435 | 119.98 |
| SK-MEL-2   | 109.07 |
| SK-MEL-28  | 118.17 |
| SK-MEL-5   | 108.21 |
| UACC-257   | 115.61 |
| UACC-62    | 90.71  |

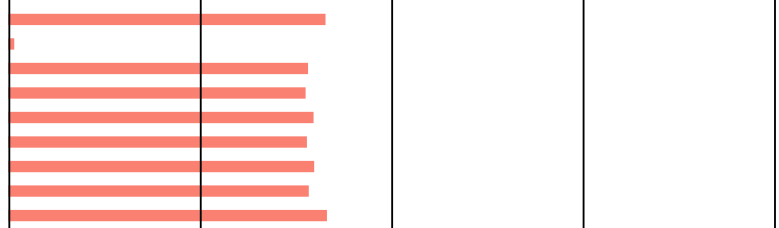

**Ovarian Cancer**

|             |        |
|-------------|--------|
| IGROV1      | 65.34  |
| OVCAR-3     | 94.85  |
| OVCAR-4     | 108.02 |
| OVCAR-5     | 113.69 |
| OVCAR-8     | 102.76 |
| NCI/ADR-RES | 100.24 |
| SK-OV-3     | 145.26 |

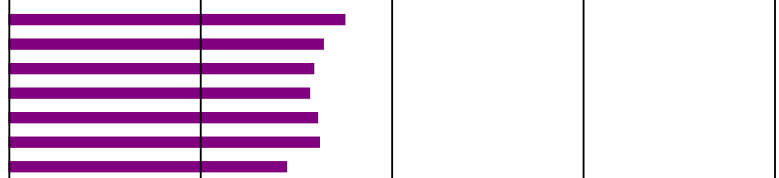

**Renal Cancer**

|         |        |
|---------|--------|
| 786-0   | 69.85  |
| A498    | 140.48 |
| ACHN    | 102.87 |
| CAKI-1  | 117.56 |
| RXF 393 | 88.05  |
| SN12C   | 96.25  |
| UO-31   | 98.39  |

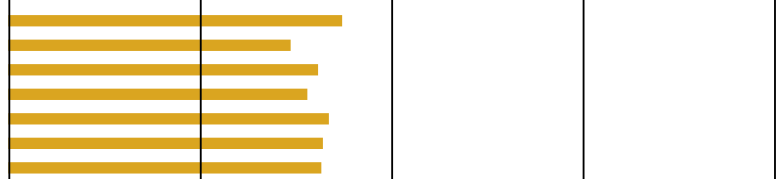

**Prostate Cancer**

|        |        |
|--------|--------|
| PC-3   | 79.00  |
| DU-145 | 105.29 |

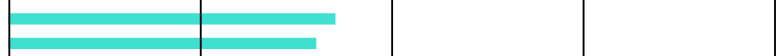

**Breast Cancer**

|                 |        |
|-----------------|--------|
| MCF7            | 102.65 |
| MDA-MB-231/ATCC | 81.28  |
| HS 578T         | 82.85  |
| BT-549          | 192.56 |
| T-47D           | 105.80 |
| MDA-MB-468      | 116.36 |

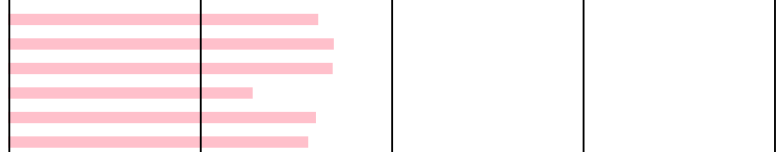

525 262.5 0.0 -262.5 -525

S91

Percentage Growth

# Developmental Therapeutics Program

NSC: D-750921 / 1

Conc: 1.00E-5 Molar

Test Date: Aug 17, 2009

## One Dose Mean Graph

Experiment ID: 0908OS22

Report Date: Jul 28, 2011

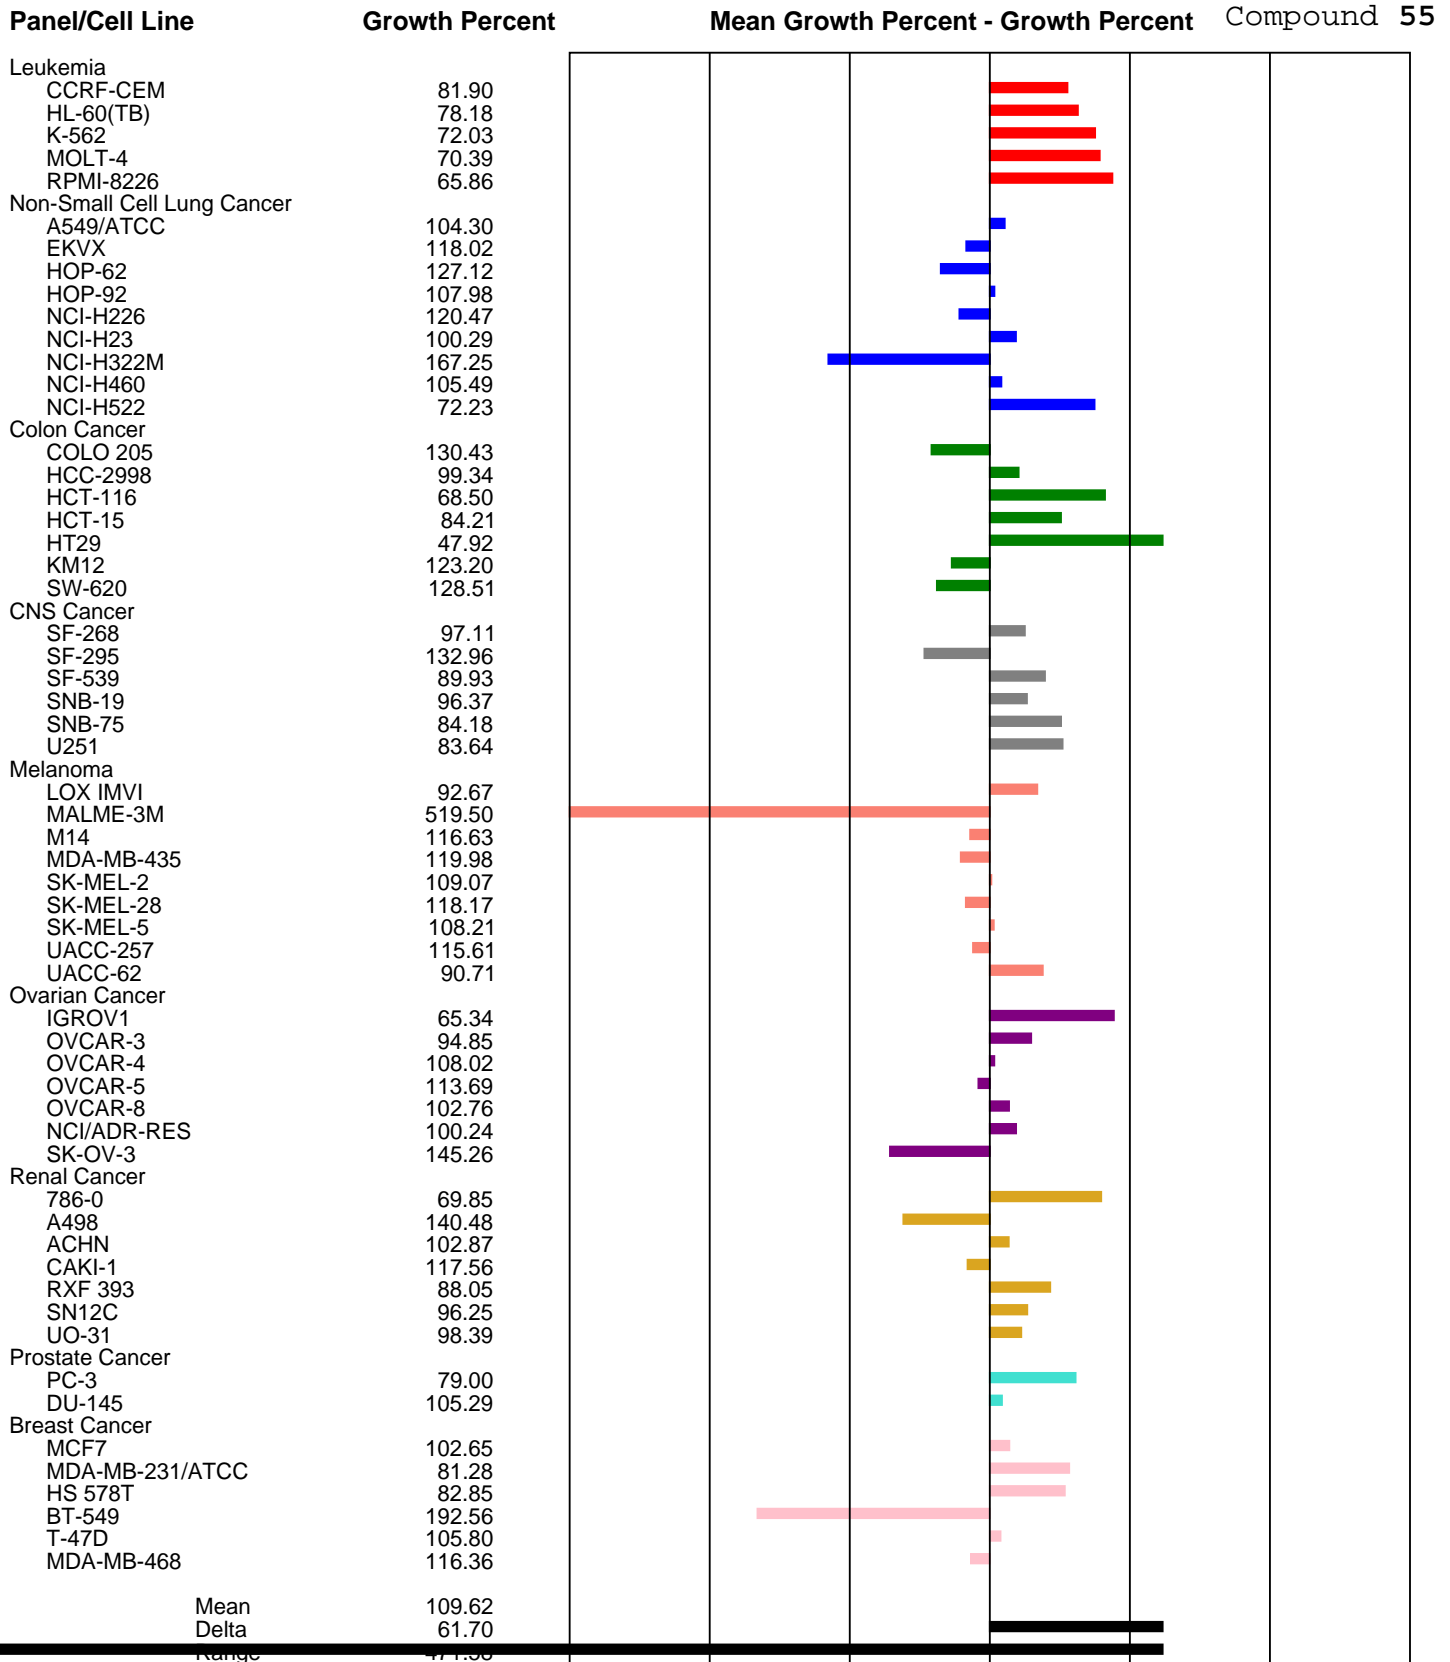

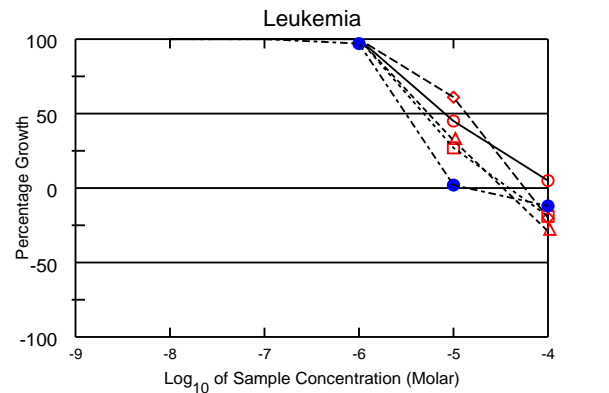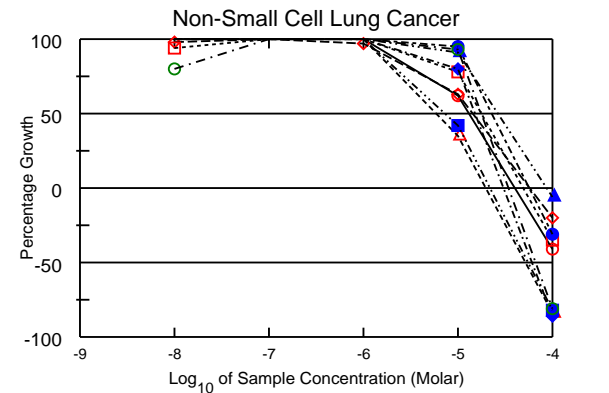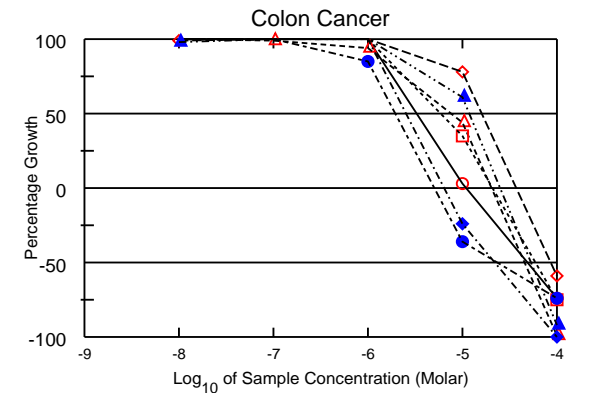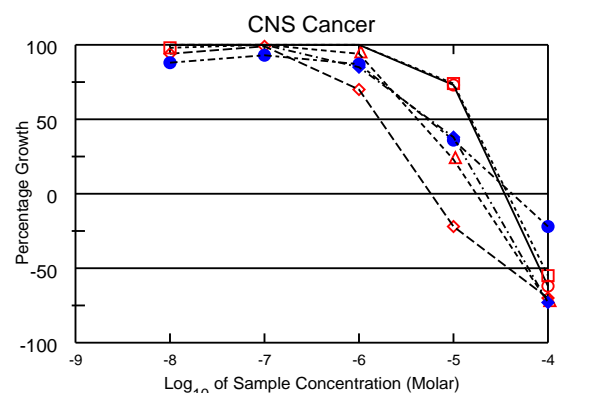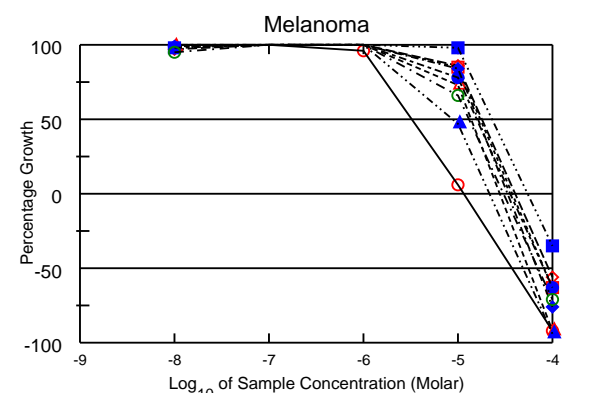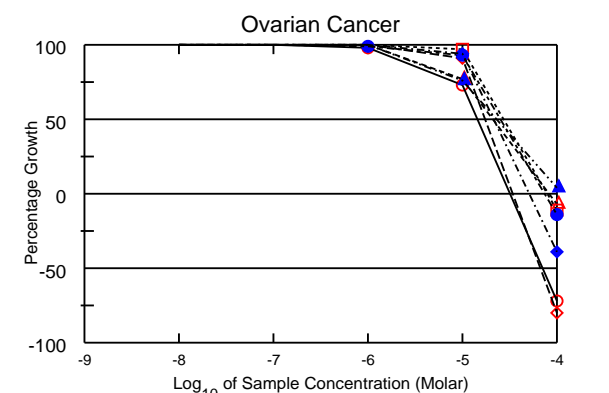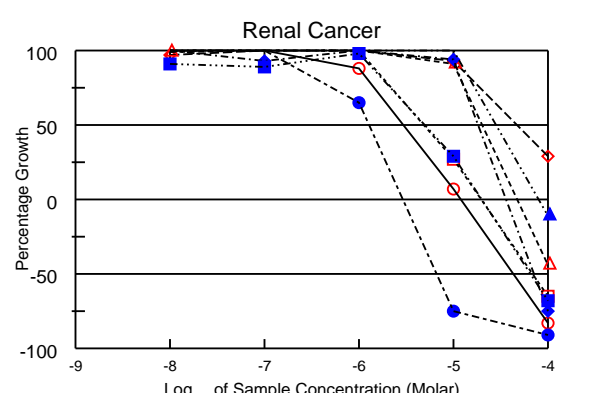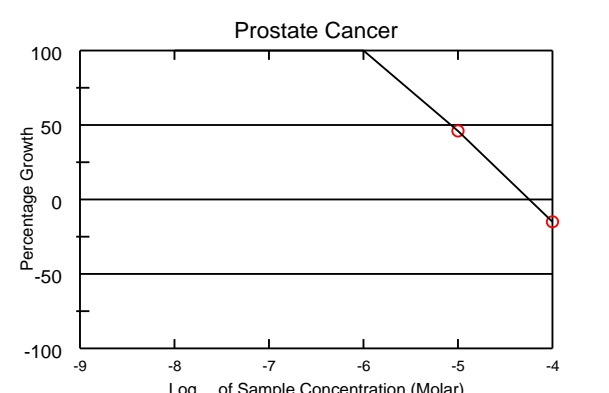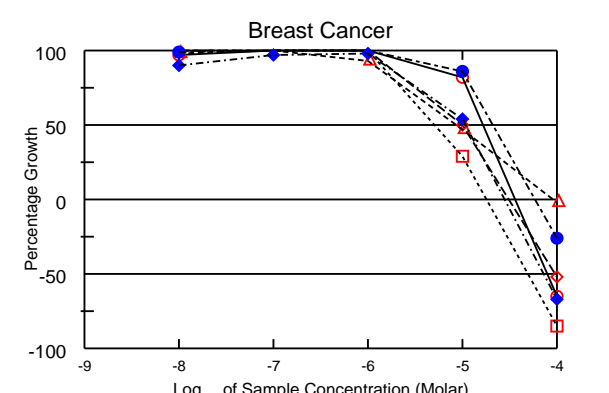

| National Cancer Institute Developmental Therapeutics Program |                        | NSC : D - 750920/1         |                       | Units :Molar |                        | SSPL :0GZS                    |         | EXP. ID :0909NS78 |  |
|--------------------------------------------------------------|------------------------|----------------------------|-----------------------|--------------|------------------------|-------------------------------|---------|-------------------|--|
| Mean Graphs                                                  |                        | Report Date :July 28, 2011 |                       | Compound 51  |                        | Test Date :September 28, 2009 |         |                   |  |
| Panel/Cell Line                                              | Log <sub>10</sub> GI50 | GI50                       | Log <sub>10</sub> TGI | TGI          | Log <sub>10</sub> LC50 | LC50                          |         |                   |  |
| Leukemia                                                     |                        |                            |                       |              |                        |                               |         |                   |  |
| CCRF-CEM                                                     | -5.08                  |                            | > -4.00               |              | > -4.00                |                               | > -4.00 |                   |  |
| HL-60(TB)                                                    | -4.86                  |                            | -4.24                 |              | -4.00                  |                               | -4.00   |                   |  |
| K-562                                                        | -5.26                  |                            | -4.47                 |              | -4.00                  |                               | -4.00   |                   |  |
| MOLT-4                                                       | -5.30                  |                            | -4.41                 |              | -4.00                  |                               | -4.00   |                   |  |
| RPMI-8226                                                    | -5.51                  |                            | -4.84                 |              | -4.00                  |                               | -4.00   |                   |  |
| Non-Small Cell Lung Cancer                                   |                        |                            |                       |              |                        |                               |         |                   |  |
| A549/ATCC                                                    | -4.88                  |                            | -4.40                 |              | > -4.00                |                               | -4.00   |                   |  |
| EKVX                                                         | -4.84                  |                            | -4.24                 |              | > -4.00                |                               | -4.00   |                   |  |
| HOP-62                                                       | -5.21                  |                            | -4.70                 |              | > -4.00                |                               | -4.28   |                   |  |
| HOP-92                                                       | -4.75                  |                            | -4.31                 |              | > -4.00                |                               | -4.00   |                   |  |
| NCI-H226                                                     | -4.64                  |                            | -4.25                 |              | > -4.00                |                               | -4.00   |                   |  |
| NCI-H23                                                      | -4.82                  |                            | -4.52                 |              | > -4.00                |                               | -4.22   |                   |  |
| NCI-H322M                                                    | -4.58                  |                            | -4.06                 |              | > -4.00                |                               | -4.00   |                   |  |
| NCI-H460                                                     | -5.13                  |                            | -4.66                 |              | > -4.00                |                               | -4.26   |                   |  |
| NCI-H522                                                     | -4.75                  |                            | -4.47                 |              | > -4.00                |                               | -4.18   |                   |  |
| Colon Cancer                                                 |                        |                            |                       |              |                        |                               |         |                   |  |
| COLO 205                                                     | -5.44                  |                            | -4.96                 |              | > -4.00                |                               | -4.31   |                   |  |
| HCC-2998                                                     | -4.80                  |                            | -4.43                 |              | > -4.00                |                               | -4.07   |                   |  |
| HCT-116                                                      | -5.11                  |                            | -4.69                 |              | > -4.00                |                               | -4.34   |                   |  |
| HCT-15                                                       | -5.20                  |                            | -4.68                 |              | > -4.00                |                               | -4.23   |                   |  |
| HT29                                                         | -5.71                  |                            | -5.30                 |              | > -4.00                |                               | -4.63   |                   |  |
| KM12                                                         | -5.58                  |                            | -5.19                 |              | > -4.00                |                               | -4.66   |                   |  |
| SW-620                                                       | -4.93                  |                            | -4.60                 |              | > -4.00                |                               | -4.27   |                   |  |
| CNS Cancer                                                   |                        |                            |                       |              |                        |                               |         |                   |  |
| SF-268                                                       | -4.83                  |                            | -4.46                 |              | > -4.00                |                               | -4.09   |                   |  |
| SF-295                                                       | -5.78                  |                            | -5.23                 |              | > -4.00                |                               | -4.41   |                   |  |
| SF-539                                                       | -5.38                  |                            | -4.76                 |              | > -4.00                |                               | -4.24   |                   |  |
| SNB-19                                                       | -4.81                  |                            | -4.43                 |              | > -4.00                |                               | -4.04   |                   |  |
| SNB-75                                                       | -5.27                  |                            | -4.37                 |              | > -4.00                |                               | -4.00   |                   |  |
| U251                                                         | -5.25                  |                            | -4.65                 |              | > -4.00                |                               | -4.20   |                   |  |
| Melanoma                                                     |                        |                            |                       |              |                        |                               |         |                   |  |
| LOX IMVI                                                     | -5.48                  |                            | -4.94                 |              | > -4.00                |                               | -4.43   |                   |  |
| MALME-3M                                                     | -4.75                  |                            | -4.39                 |              | > -4.00                |                               | -4.04   |                   |  |
| M14                                                          | -4.86                  |                            | -4.56                 |              | > -4.00                |                               | -4.25   |                   |  |
| MDA-MB-435                                                   | -4.76                  |                            | -4.42                 |              | > -4.00                |                               | -4.09   |                   |  |
| SK-MEL-2                                                     | -4.80                  |                            | -4.45                 |              | > -4.00                |                               | -4.09   |                   |  |
| SK-MEL-28                                                    | -4.79                  |                            | -4.48                 |              | > -4.00                |                               | -4.16   |                   |  |
| SK-MEL-5                                                     | -5.06                  |                            | -4.67                 |              | > -4.00                |                               | -4.31   |                   |  |
| UACC-257                                                     | -4.64                  |                            | -4.26                 |              | > -4.00                |                               | -4.00   |                   |  |
| UACC-62                                                      | -4.89                  |                            | -4.52                 |              | > -4.00                |                               | -4.15   |                   |  |
| Ovarian Cancer                                               |                        |                            |                       |              |                        |                               |         |                   |  |
| IGROV1                                                       | -4.84                  |                            | -4.50                 |              | > -4.00                |                               | -4.15   |                   |  |
| OVCAR-3                                                      | -4.76                  |                            | -4.47                 |              | > -4.00                |                               | -4.18   |                   |  |
| OVCAR-4                                                      | -4.68                  |                            | -4.08                 |              | > -4.00                |                               | -4.00   |                   |  |
| OVCAR-5                                                      | -4.56                  |                            | -4.10                 |              | > -4.00                |                               | -4.00   |                   |  |
| OVCAR-8                                                      | -4.60                  |                            | -4.13                 |              | > -4.00                |                               | -4.00   |                   |  |
| NCI/ADR-RES                                                  | -4.67                  |                            | -4.29                 |              | > -4.00                |                               | -4.00   |                   |  |
| SK-OV-3                                                      | -4.64                  |                            | > -4.00               |              | > -4.00                |                               | -4.00   |                   |  |
| Renal Cancer                                                 |                        |                            |                       |              |                        |                               |         |                   |  |
| 786-O                                                        | -5.53                  |                            | -4.92                 |              | > -4.00                |                               | -4.37   |                   |  |
| A498                                                         | -4.33                  |                            | > -4.00               |              | > -4.00                |                               | -4.00   |                   |  |
| ACHN                                                         | -4.70                  |                            | -4.33                 |              | > -4.00                |                               | -4.00   |                   |  |
| CAKI-1                                                       | -5.27                  |                            | -4.70                 |              | > -4.00                |                               | -4.17   |                   |  |
| RXF 393                                                      | -5.89                  |                            | -5.54                 |              | > -4.00                |                               | -5.18   |                   |  |
| SN12C                                                        | -4.74                  |                            | -4.44                 |              | > -4.00                |                               | -4.15   |                   |  |
| TK-10                                                        | -4.53                  |                            | -4.10                 |              | > -4.00                |                               | -4.00   |                   |  |
| UO-31                                                        | -5.30                  |                            | -4.70                 |              | > -4.00                |                               | -4.19   |                   |  |
| Prostate Cancer                                              |                        |                            |                       |              |                        |                               |         |                   |  |
| PC-3                                                         | -5.07                  |                            | -4.25                 |              | > -4.00                |                               | -4.00   |                   |  |
| Breast Cancer                                                |                        |                            |                       |              |                        |                               |         |                   |  |
| MCF7                                                         | -4.78                  |                            | -4.44                 |              | > -4.00                |                               | -4.10   |                   |  |
| MDA-MB-231/ATCC                                              | -5.00                  |                            | -4.51                 |              | > -4.00                |                               | -4.02   |                   |  |
| HS 578T                                                      | -5.06                  |                            | -4.03                 |              | > -4.00                |                               | -4.00   |                   |  |
| BT-549                                                       | -5.30                  |                            | -4.75                 |              | > -4.00                |                               | -4.31   |                   |  |
| T-47D                                                        | -4.68                  |                            | -4.23                 |              | > -4.00                |                               | -4.00   |                   |  |
| MDA-MB-468                                                   | -4.96                  |                            | -4.55                 |              | > -4.00                |                               | -4.14   |                   |  |
| MID                                                          | -4.99                  |                            | -4.5                  |              | -4.15                  |                               |         |                   |  |
| Delta                                                        | 0.9                    |                            | 1.04                  |              | 1.03                   |                               |         |                   |  |
| Range                                                        | 1.56                   |                            | 1.54                  |              | 1.18                   |                               |         |                   |  |

S94

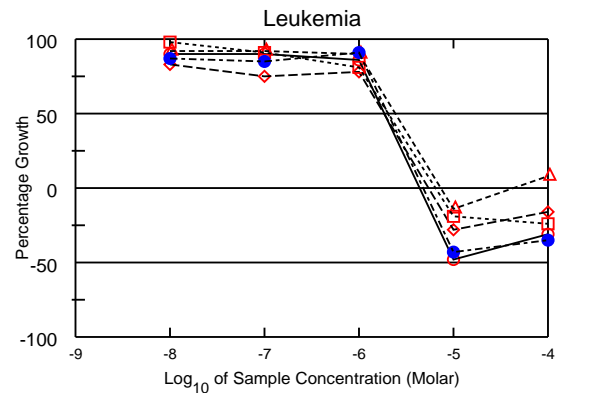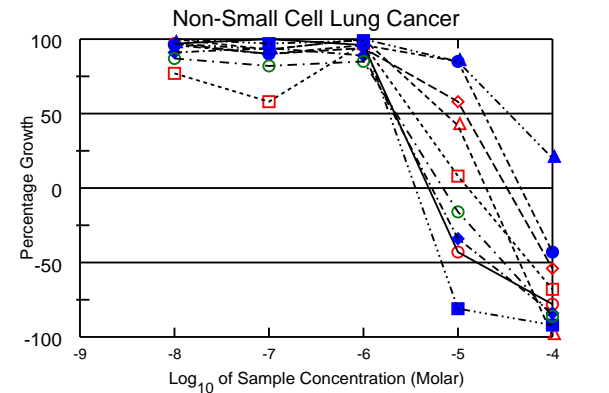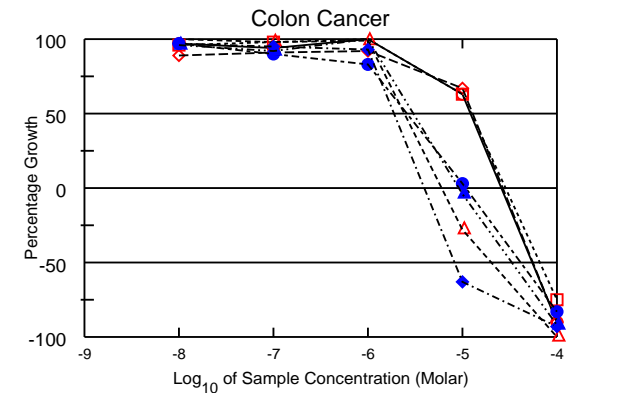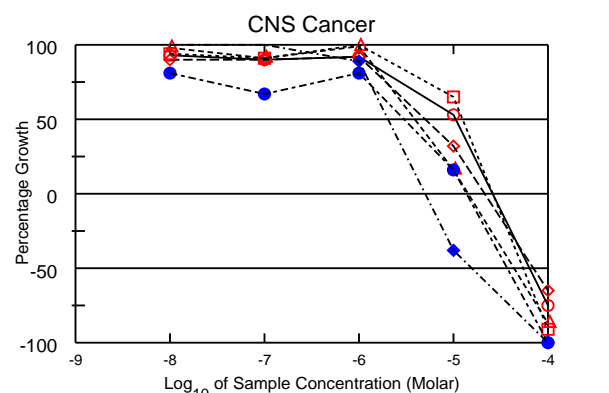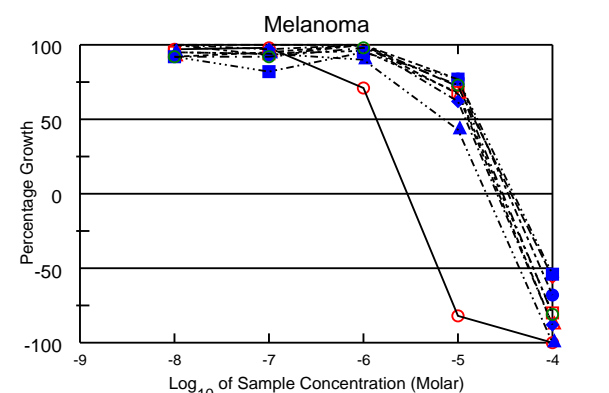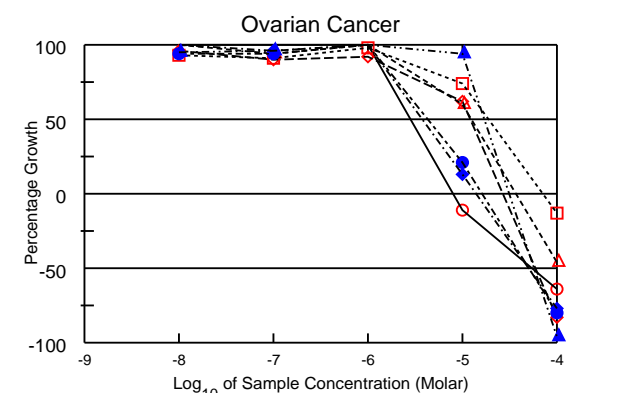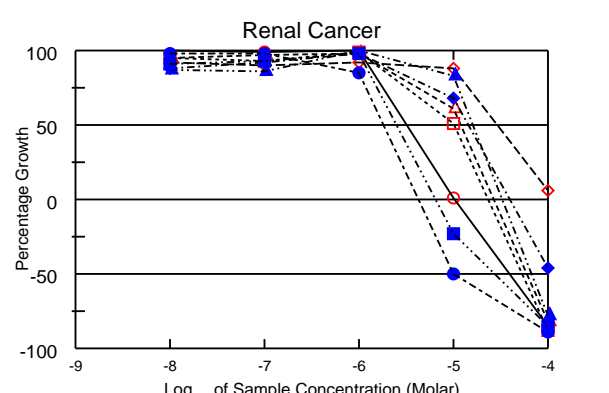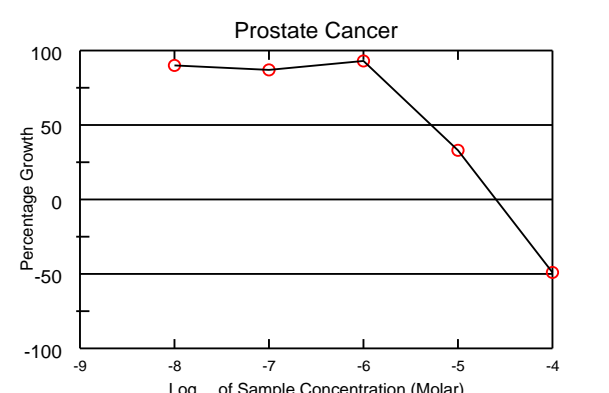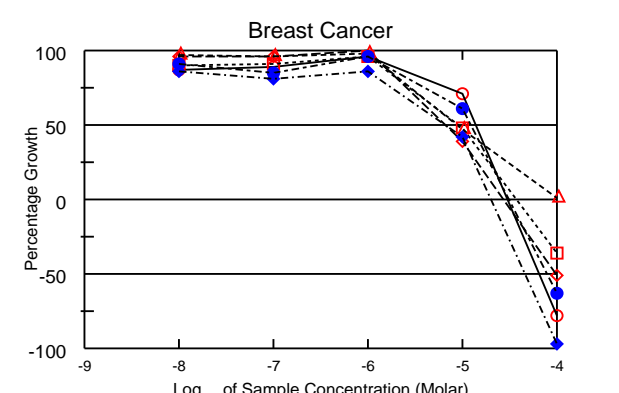

| National Cancer Institute Developmental Therapeutics Program |                        | NSC : D - 750923/1         | Units :Molar          | SSPL :0GZS | EXP. ID :0909NS78             |       |
|--------------------------------------------------------------|------------------------|----------------------------|-----------------------|------------|-------------------------------|-------|
| Mean Graphs                                                  |                        | Report Date :July 28, 2011 | Compound 53           |            | Test Date :September 28, 2009 |       |
| Panel/Cell Line                                              | Log <sub>10</sub> GI50 | GI50                       | Log <sub>10</sub> TGI | TGI        | Log <sub>10</sub> LC50        | LC50  |
| <hr/>                                                        |                        |                            |                       |            |                               |       |
| Leukemia                                                     |                        |                            |                       |            |                               |       |
| CCRF-CEM                                                     | -5.73                  |                            | -5.36                 |            | >                             | -4.00 |
| HL-60(TB)                                                    | -5.74                  |                            | -5.26                 |            | >                             | -4.00 |
| K-562                                                        | -5.62                  |                            |                       |            | >                             | -4.00 |
| MOLT-4                                                       | -5.69                  |                            | -5.19                 |            | >                             | -4.00 |
| RPMI-8226                                                    | -5.69                  |                            | -5.32                 |            | >                             | -4.00 |
| Non-Small Cell Lung Cancer                                   |                        |                            |                       |            |                               |       |
| A549/ATCC                                                    | -5.67                  |                            | -5.31                 |            |                               | -4.80 |
| EKVX                                                         | -4.93                  |                            | -4.48                 |            |                               | -4.04 |
| HOP-62                                                       | -5.13                  |                            | -4.70                 |            |                               | -4.35 |
| HOP-92                                                       | -5.47                  |                            | -4.90                 |            |                               | -4.24 |
| NCI-H226                                                     | -4.73                  |                            | -4.34                 |            | >                             | -4.00 |
| NCI-H23                                                      | -5.68                  |                            | -5.28                 |            |                               | -4.68 |
| NCI-H322M                                                    | -4.46                  |                            | >                     | -4.00      | >                             | -4.00 |
| NCI-H460                                                     | -5.73                  |                            | -5.45                 |            |                               | -5.17 |
| NCI-H522                                                     | -5.66                  |                            | -5.16                 |            |                               | -4.51 |
| Colon Cancer                                                 |                        |                            |                       |            |                               |       |
| COLO 205                                                     | -4.92                  |                            | -4.59                 |            |                               | -4.26 |
| HCC-2998                                                     | -4.89                  |                            | -4.57                 |            |                               | -4.25 |
| HCT-116                                                      | -5.61                  |                            | -5.22                 |            |                               | -4.69 |
| HCT-15                                                       | -4.91                  |                            | -4.54                 |            |                               | -4.18 |
| HT29                                                         | -5.59                  |                            | -4.96                 |            |                               | -4.38 |
| KM12                                                         | -5.72                  |                            | -5.40                 |            |                               | -5.08 |
| SW-620                                                       | -5.52                  |                            | -5.04                 |            |                               | -4.48 |
| CNS Cancer                                                   |                        |                            |                       |            |                               |       |
| SF-268                                                       | -4.98                  |                            | -4.59                 |            |                               | -4.20 |
| SF-295                                                       | -5.30                  |                            | -4.67                 |            |                               | -4.16 |
| SF-539                                                       | -5.41                  |                            | -4.85                 |            |                               | -4.36 |
| SNB-19                                                       | -4.90                  |                            | -4.58                 |            |                               | -4.26 |
| SNB-75                                                       | -5.53                  |                            | -4.86                 |            |                               | -4.43 |
| U251                                                         | -5.69                  |                            | -5.30                 |            |                               | -4.80 |
| Melanoma                                                     |                        |                            |                       |            |                               |       |
| LOX IMVI                                                     | -5.83                  |                            | -5.54                 |            |                               | -5.21 |
| MALME-3M                                                     | -4.83                  |                            | -4.44                 |            |                               | -4.05 |
| M14                                                          | -4.89                  |                            | -4.57                 |            |                               | -4.24 |
| MDA-MB-435                                                   | -4.88                  |                            | -4.54                 |            |                               | -4.20 |
| SK-MEL-2                                                     | -4.81                  |                            | -4.47                 |            |                               | -4.12 |
| SK-MEL-28                                                    | -4.92                  |                            | -4.59                 |            |                               | -4.25 |
| SK-MEL-5                                                     | -5.15                  |                            | -4.70                 |            |                               | -4.35 |
| UACC-257                                                     | -4.79                  |                            | -4.41                 |            |                               | -4.03 |
| UACC-62                                                      | -4.85                  |                            | -4.53                 |            |                               | -4.20 |
| Ovarian Cancer                                               |                        |                            |                       |            |                               |       |
| IGROV1                                                       | -5.53                  |                            | -5.10                 |            |                               | -4.27 |
| OVCAR-3                                                      | -4.92                  |                            | -4.57                 |            |                               | -4.23 |
| OVCAR-4                                                      | -4.90                  |                            | -4.43                 |            | >                             | -4.00 |
| OVCAR-5                                                      | -4.72                  |                            | -4.15                 |            | >                             | -4.00 |
| OVCAR-8                                                      | -5.36                  |                            | -4.79                 |            |                               | -4.30 |
| NCI/ADR-RES                                                  | -5.41                  |                            | -4.85                 |            |                               | -4.30 |
| SK-OV-3                                                      | -4.77                  |                            | -4.51                 |            |                               | -4.24 |
| Renal Cancer                                                 |                        |                            |                       |            |                               |       |
| 786-O                                                        | -5.48                  |                            | -4.99                 |            |                               | -4.41 |
| A498                                                         | -4.54                  |                            | >                     | -4.00      | >                             | -4.00 |
| ACHN                                                         | -4.93                  |                            | -4.58                 |            | >                             | -4.23 |
| CAKI-1                                                       | -4.99                  |                            | -4.63                 |            |                               | -4.27 |
| RXF 393                                                      | -5.74                  |                            | -5.37                 |            |                               | -5.00 |
| SN12C                                                        | -4.84                  |                            | -4.40                 |            | >                             | -4.00 |
| TK-10                                                        | -4.80                  |                            | -4.49                 |            |                               | -4.17 |
| UO-31                                                        | -5.60                  |                            | -5.19                 |            |                               | -4.56 |
| Prostate Cancer                                              |                        |                            |                       |            |                               |       |
| PC-3                                                         | -5.29                  |                            | -4.60                 |            | >                             | -4.00 |
| Breast Cancer                                                |                        |                            |                       |            |                               |       |
| MCF7                                                         | -4.86                  |                            | -4.52                 |            |                               | -4.19 |
| MDA-MB-231/ATCC                                              | -5.18                  |                            | -4.57                 |            |                               | -4.01 |
| HS 578T                                                      | -5.06                  |                            | >                     | -4.00      | >                             | -4.00 |
| BT-549                                                       | -5.04                  |                            | -4.43                 |            | >                             | -4.00 |
| T-47D                                                        | -4.91                  |                            | -4.51                 |            |                               | -4.11 |
| MDA-MB-468                                                   | -5.18                  |                            | -4.70                 |            |                               | -4.34 |
| <hr/>                                                        |                        |                            |                       |            |                               |       |
| MID                                                          | -5.21                  |                            | -4.76                 |            | -4.29                         |       |
| Delta                                                        | 0.65                   |                            | 0.78                  | S96        | 0.92                          |       |
| Range                                                        | 1.4                    |                            | 1.54                  |            | 1.21                          |       |



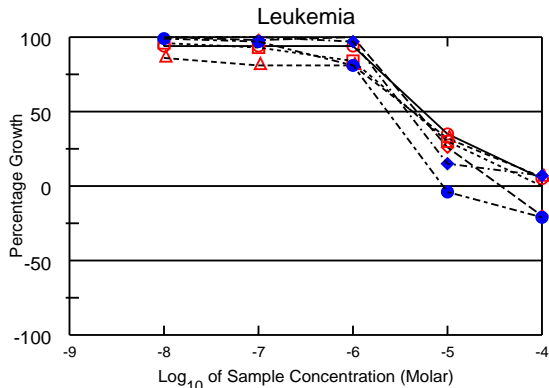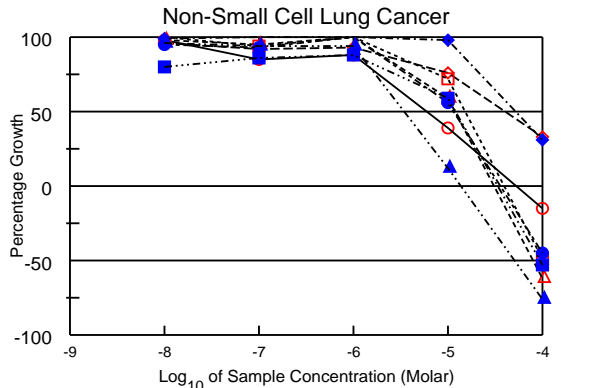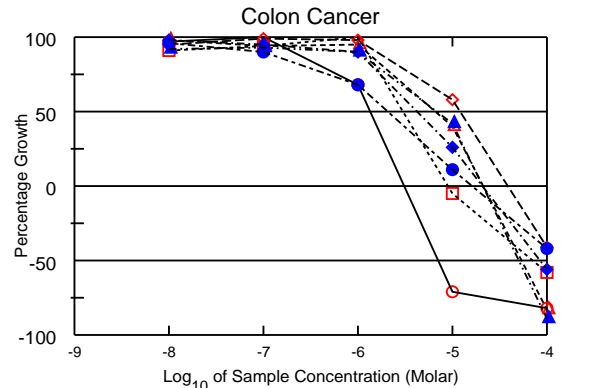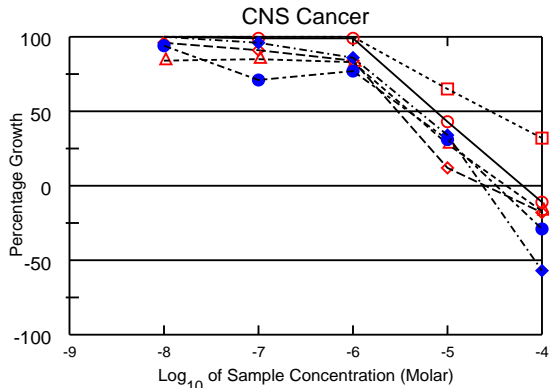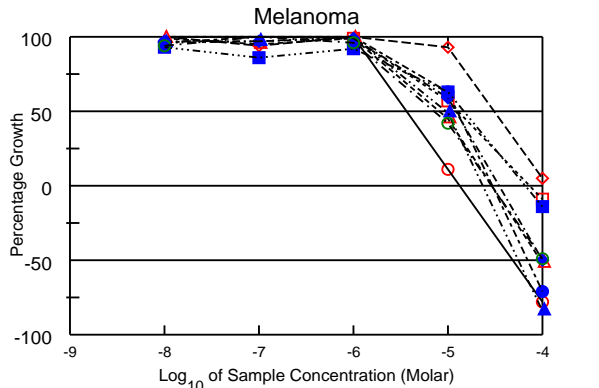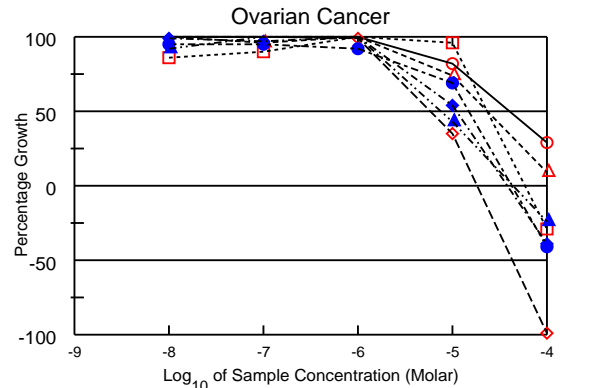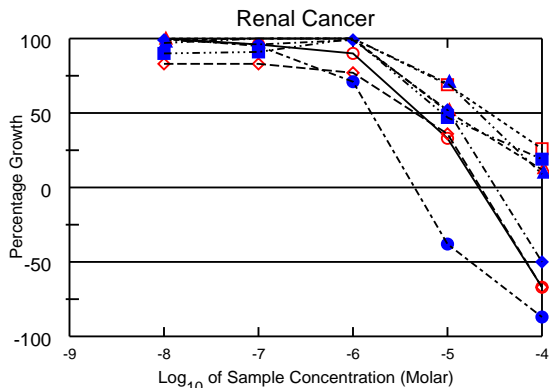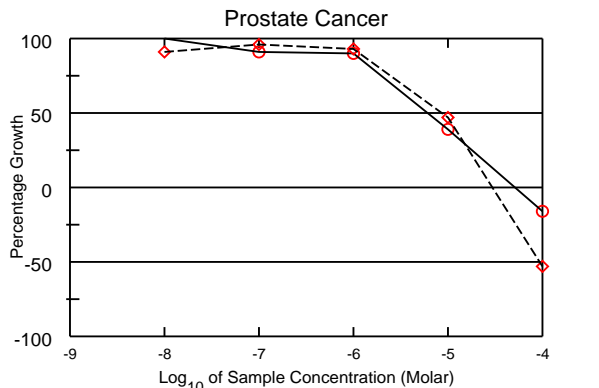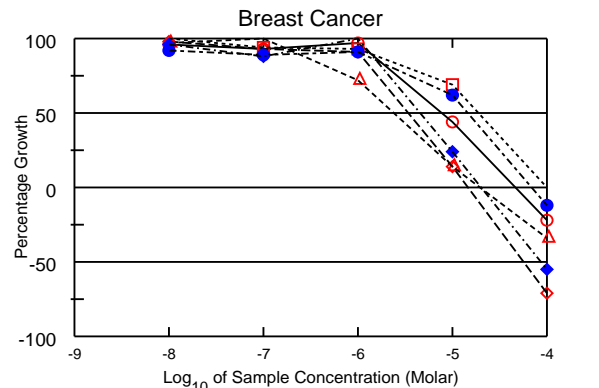

Mean Graphs

Report Date :July 28, 2011

Compound **54**

Test Date :November 02, 2009

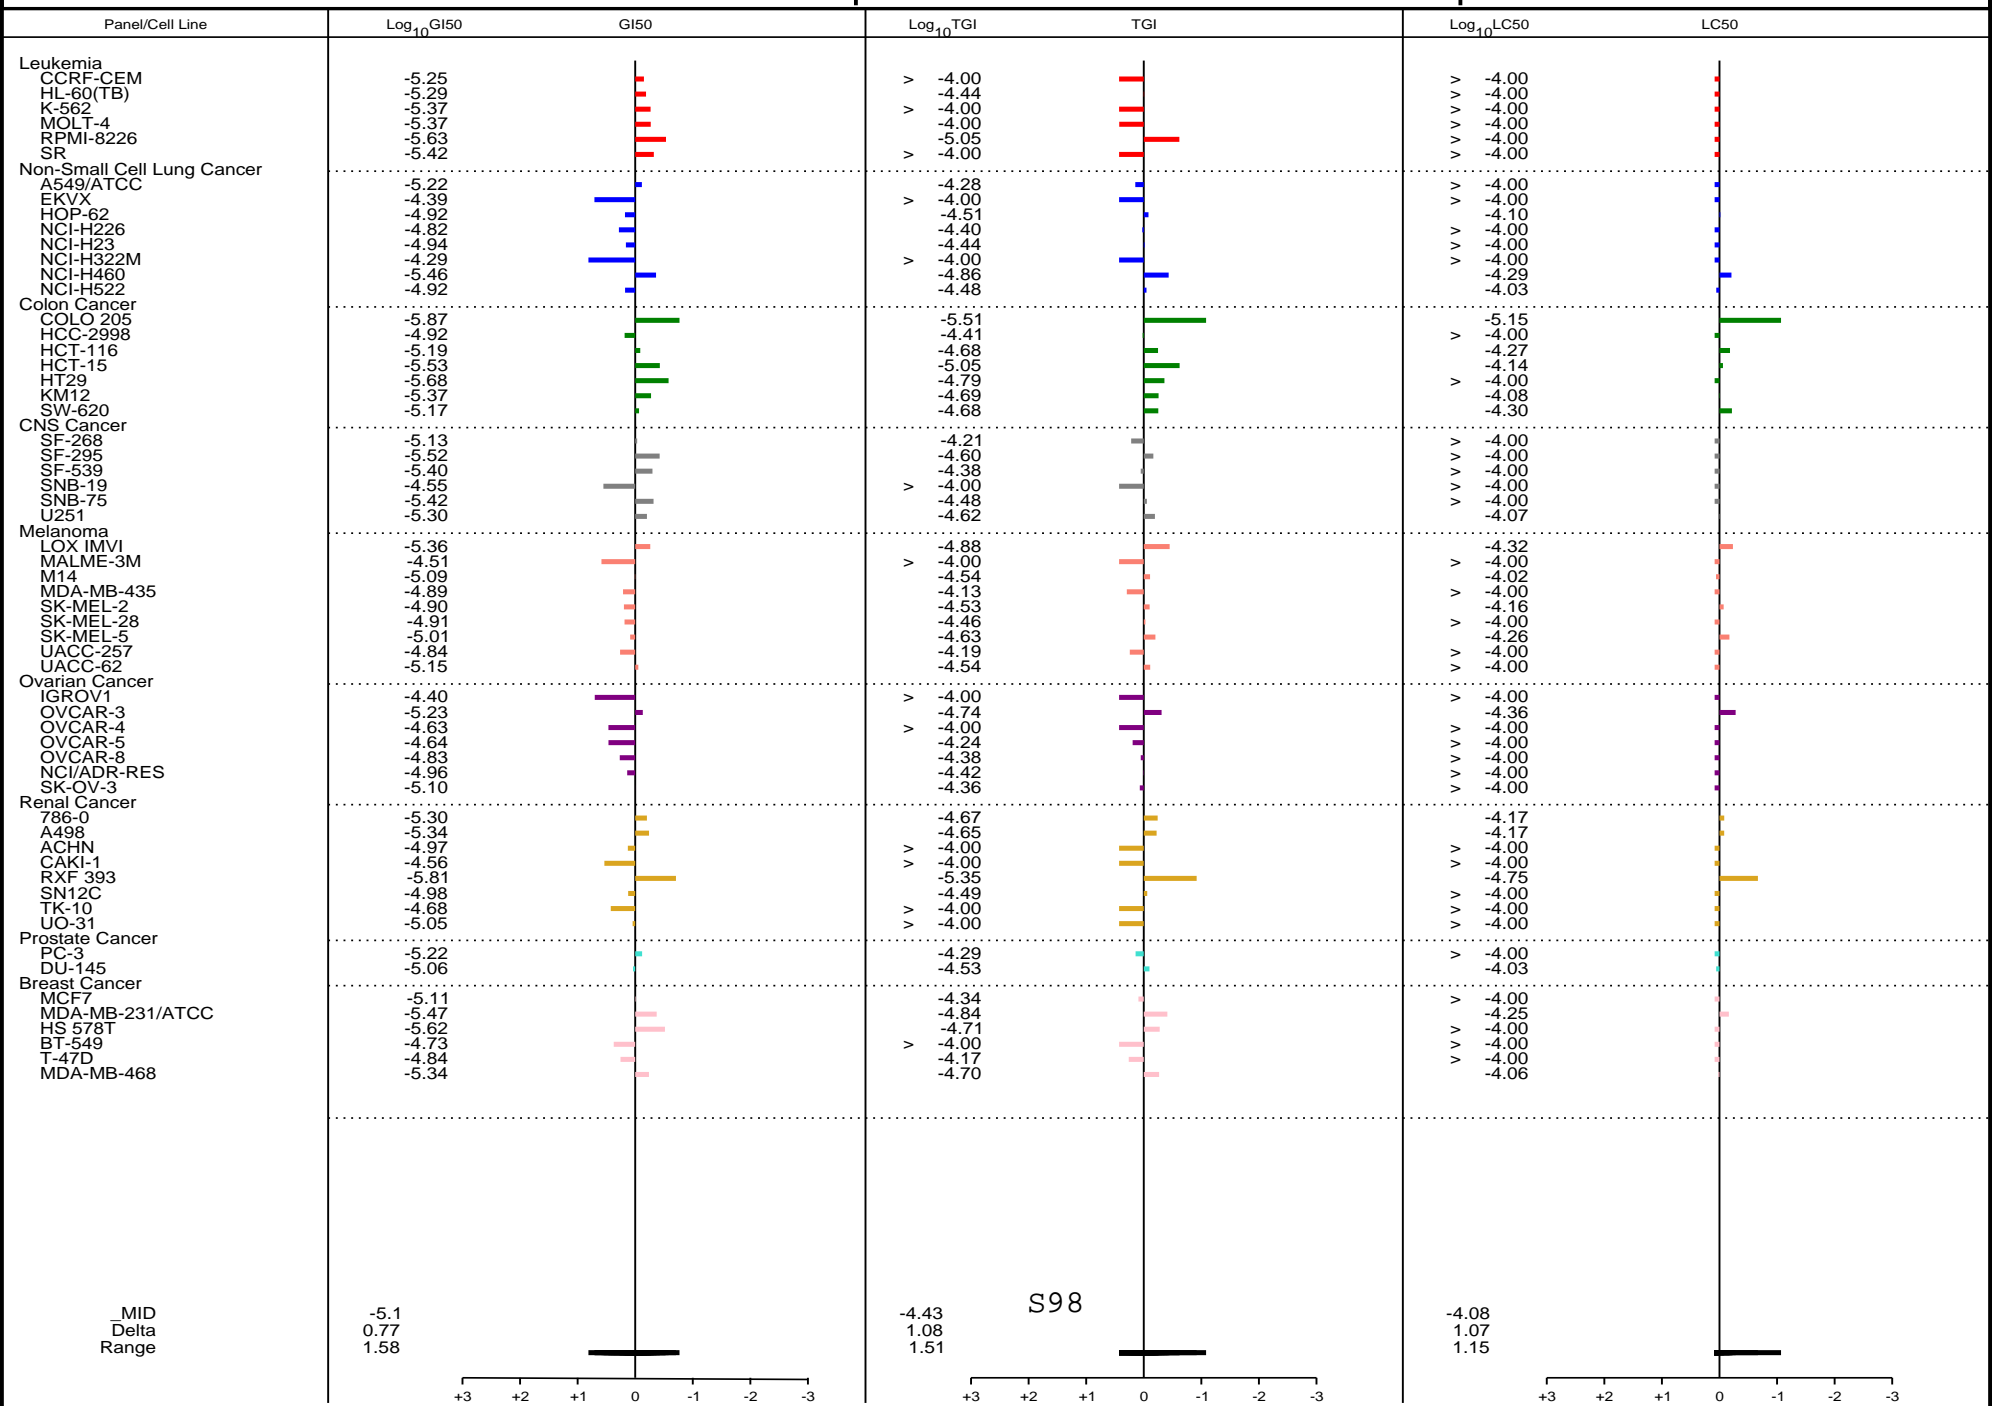

S98

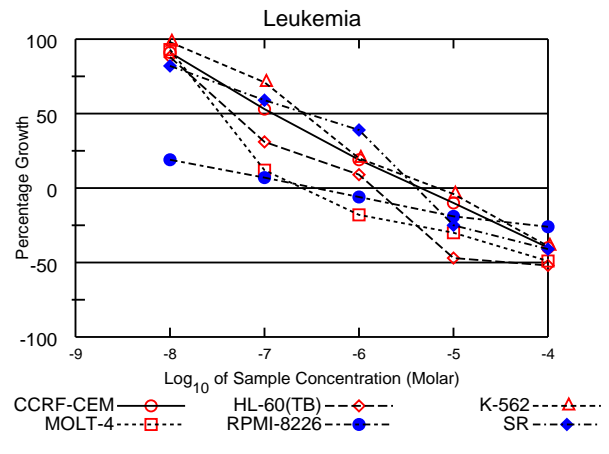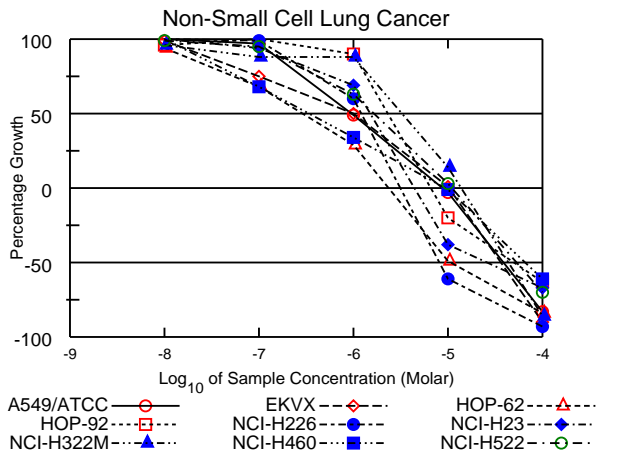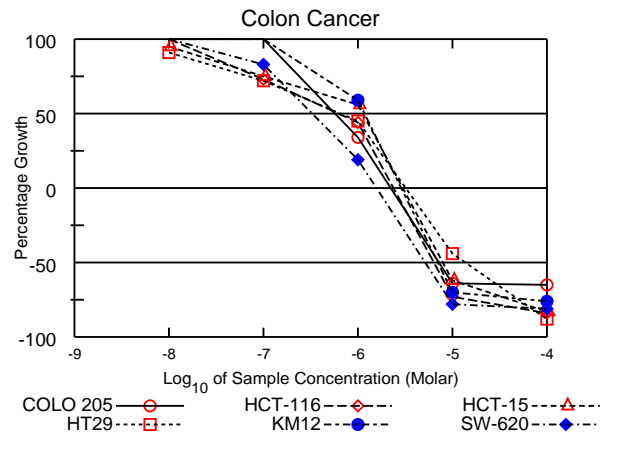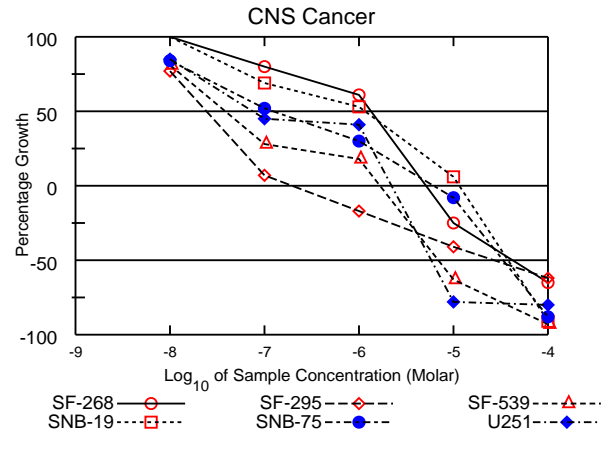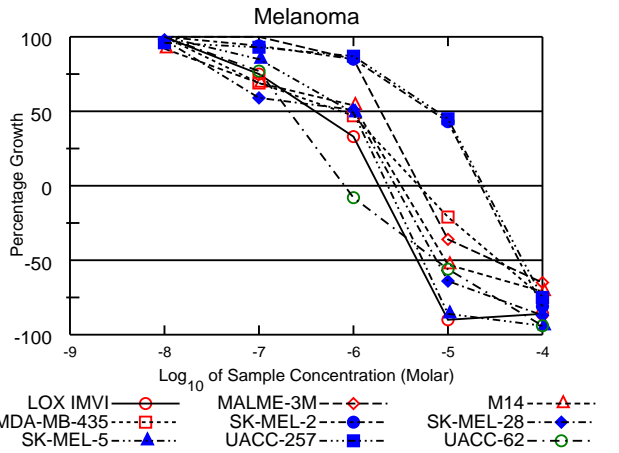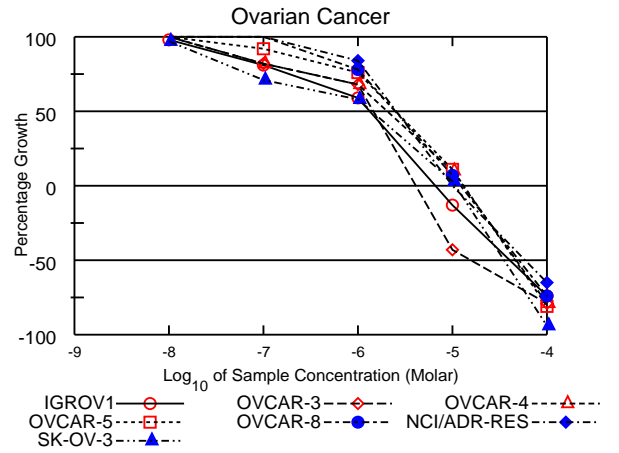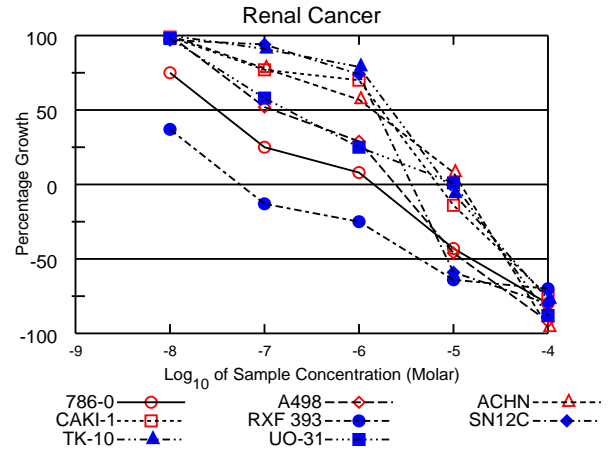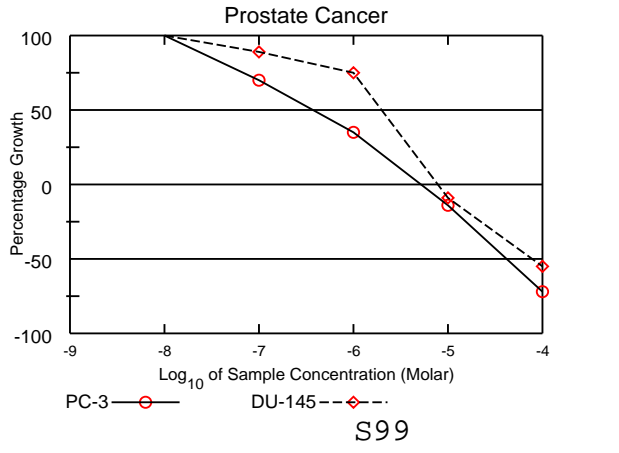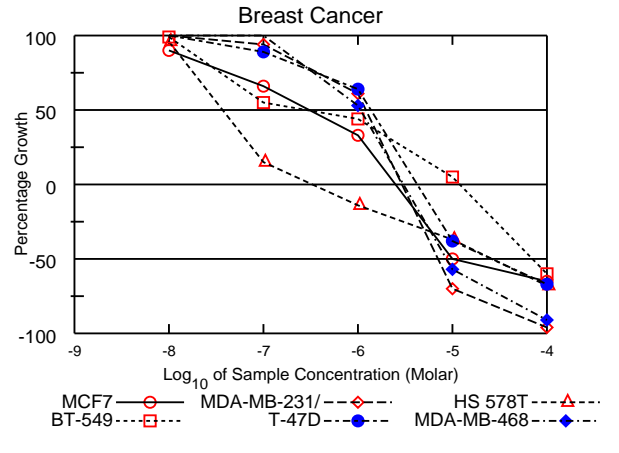

| National Cancer Institute Developmental Therapeutics Program |                        | NSC : D - 746839/1         | Units :Molar          | SSPL :0GZS | EXP. ID :0804NS72         |      |
|--------------------------------------------------------------|------------------------|----------------------------|-----------------------|------------|---------------------------|------|
| Mean Graphs                                                  |                        | Report Date :July 28, 2011 | Compound <b>56</b>    |            | Test Date :April 14, 2008 |      |
| Panel/Cell Line                                              | Log <sub>10</sub> GI50 | GI50                       | Log <sub>10</sub> TGI | TGI        | Log <sub>10</sub> LC50    | LC50 |
| Leukemia                                                     |                        |                            |                       |            |                           |      |
| CCRF-CEM                                                     | -6.92                  |                            | -5.36                 |            | > -4.00                   |      |
| HL-60(TB)                                                    | -7.33                  |                            | -5.84                 |            | -4.43                     |      |
| K-562                                                        | -6.58                  |                            | -5.16                 |            | > -4.00                   |      |
| MOLT-4                                                       | -7.47                  |                            | -6.61                 |            | > -4.00                   |      |
| RPMI-8226                                                    | < -8.00                |                            | -6.46                 |            | > -4.00                   |      |
| SR                                                           | -6.54                  |                            | -5.39                 |            | > -4.00                   |      |
| Non-Small Cell Lung Cancer                                   |                        |                            |                       |            |                           |      |
| A549/ATCC                                                    | -6.02                  |                            | -5.05                 |            | -4.41                     |      |
| EKVX                                                         | -6.01                  |                            | -4.99                 |            | -4.44                     |      |
| HOP-62                                                       | -6.54                  |                            | -5.63                 |            | -4.97                     |      |
| HOP-92                                                       | -5.64                  |                            | -5.18                 |            | -4.30                     |      |
| NCI-H226                                                     | -5.91                  |                            | -5.50                 |            | -5.09                     |      |
| NCI-H23                                                      | -5.82                  |                            | -5.35                 |            | -4.58                     |      |
| NCI-H322M                                                    | -5.49                  |                            | -4.86                 |            | -4.36                     |      |
| NCI-H460                                                     | -6.47                  |                            | -5.04                 |            | -4.19                     |      |
| NCI-H522                                                     | -5.79                  |                            | -4.96                 |            | -4.28                     |      |
| Colon Cancer                                                 |                        |                            |                       |            |                           |      |
| COLO 205                                                     | -6.24                  |                            | -5.65                 |            | -5.14                     |      |
| HCT-116                                                      | -6.22                  |                            | -5.63                 |            | -5.20                     |      |
| HCT-15                                                       | -5.95                  |                            | -5.53                 |            | -5.10                     |      |
| HT29                                                         | -6.19                  |                            | -5.50                 |            | -4.87                     |      |
| KM12                                                         | -5.93                  |                            | -5.54                 |            | -5.15                     |      |
| SW-620                                                       | -6.48                  |                            | -5.80                 |            | -5.29                     |      |
| CNS Cancer                                                   |                        |                            |                       |            |                           |      |
| SF-268                                                       | -5.87                  |                            | -5.29                 |            | -4.37                     |      |
| SF-295                                                       | -7.62                  |                            | -6.71                 |            | -4.57                     |      |
| SF-539                                                       | -7.41                  |                            | -5.78                 |            | -5.16                     |      |
| SNB-19                                                       | -5.93                  |                            | -4.94                 |            | -4.42                     |      |
| SNB-75                                                       | -6.91                  |                            | -5.20                 |            | -4.47                     |      |
| U251                                                         | -7.12                  |                            | -5.66                 |            | -5.23                     |      |
| Melanoma                                                     |                        |                            |                       |            |                           |      |
| LOX IMVI                                                     | -6.40                  |                            | -5.73                 |            | -5.33                     |      |
| MALME-3M                                                     | -5.71                  |                            | -5.29                 |            | -4.51                     |      |
| M14                                                          | -5.96                  |                            | -5.49                 |            | -5.03                     |      |
| MDA-MB-435                                                   | -6.12                  |                            | -5.30                 |            | -4.46                     |      |
| SK-MEL-2                                                     | -5.16                  |                            | -4.65                 |            | -4.25                     |      |
| SK-MEL-28                                                    | -6.00                  |                            | -5.56                 |            | -5.12                     |      |
| SK-MEL-5                                                     | -6.02                  |                            | -5.64                 |            | -5.27                     |      |
| UACC-257                                                     | -5.12                  |                            | -4.63                 |            | -4.21                     |      |
| UACC-62                                                      | -6.69                  |                            | -6.10                 |            | -5.13                     |      |
| Ovarian Cancer                                               |                        |                            |                       |            |                           |      |
| IGROV1                                                       | -5.87                  |                            | -5.18                 |            | -4.39                     |      |
| OVCAR-3                                                      | -5.84                  |                            | -5.39                 |            | -4.81                     |      |
| OVCAR-4                                                      | -5.69                  |                            | -4.89                 |            | -4.32                     |      |
| OVCAR-5                                                      | -5.60                  |                            | -4.88                 |            | -4.34                     |      |
| OVCAR-8                                                      | -5.60                  |                            | -4.91                 |            | -4.29                     |      |
| NCI/ADR-RES                                                  | -5.59                  |                            | -4.99                 |            | -4.23                     |      |
| SK-OV-3                                                      | -5.86                  |                            | -4.97                 |            | -4.45                     |      |
| Renal Cancer                                                 |                        |                            |                       |            |                           |      |
| 786-C                                                        | -7.50                  |                            | -5.84                 |            | -4.81                     |      |
| A498                                                         | -6.93                  |                            | -5.61                 |            | -4.92                     |      |
| ACHN                                                         | -5.85                  |                            | -4.92                 |            | -4.44                     |      |
| CAKI-1                                                       | -5.77                  |                            | -5.17                 |            | -4.41                     |      |
| RXF 393                                                      | < -8.00                |                            | -7.26                 |            | -5.36                     |      |
| SN12C                                                        | -5.82                  |                            | -5.44                 |            | -5.07                     |      |
| TK-10                                                        | -5.66                  |                            | -5.07                 |            | -4.38                     |      |
| UO-31                                                        | -6.75                  |                            | -4.99                 |            | -4.43                     |      |
| Prostate Cancer                                              |                        |                            |                       |            |                           |      |
| PC-3                                                         | -6.43                  |                            | -5.28                 |            | -4.38                     |      |
| DU-145                                                       | -5.70                  |                            | -5.11                 |            | -4.11                     |      |
| Breast Cancer                                                |                        |                            |                       |            |                           |      |
| MCF7                                                         | -6.51                  |                            | -5.60                 |            | -4.98                     |      |
| MDA-MB-231/ATCC                                              | -5.92                  |                            | -5.54                 |            | -5.15                     |      |
| HS 578T                                                      | -7.43                  |                            | -6.48                 |            | -4.58                     |      |
| BT-549                                                       | -6.56                  |                            | -4.92                 |            | -4.16                     |      |
| T-47D                                                        | -5.86                  |                            | -5.37                 |            | -4.59                     |      |
| MDA-MB-468                                                   | -5.98                  |                            | -5.52                 |            | -5.07                     |      |
| MID                                                          | -6.28                  |                            | -5.43                 |            | -4.63                     |      |
| Delta                                                        | 1.72                   |                            | 1.83                  |            | 0.73                      |      |
| Range                                                        | 2.88                   |                            | 2.63                  |            | 1.36                      |      |

S100

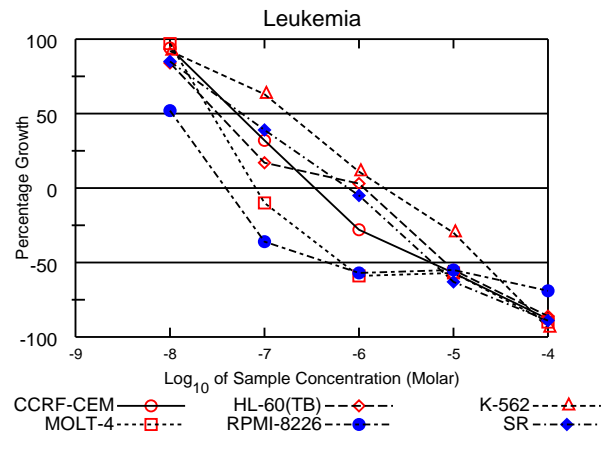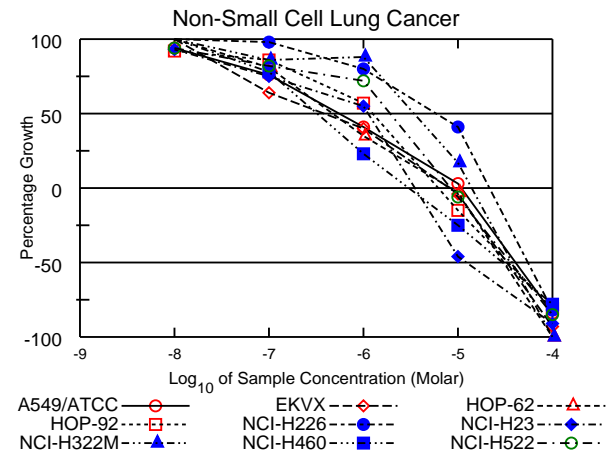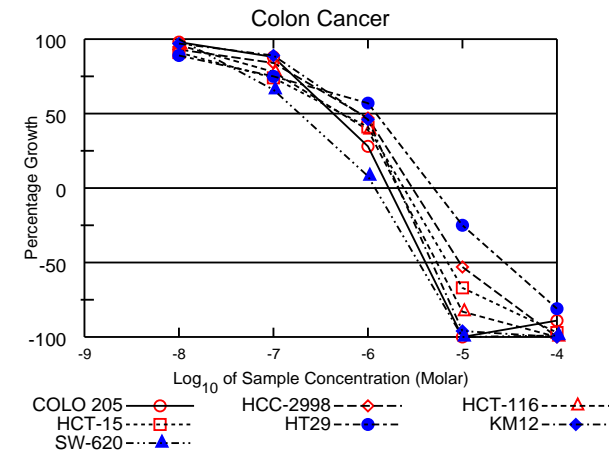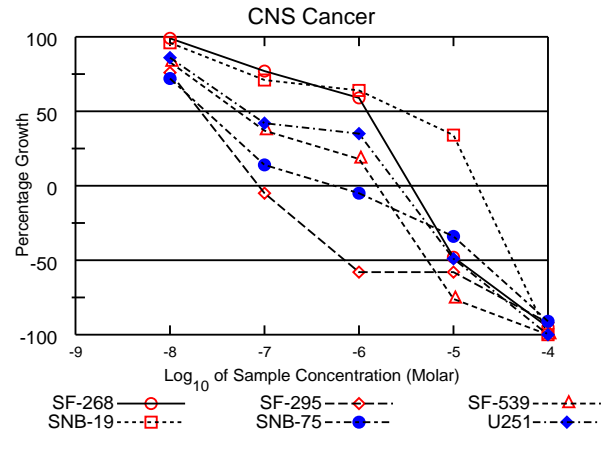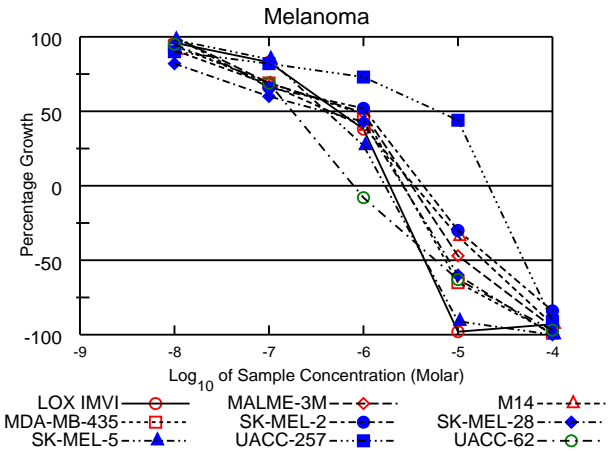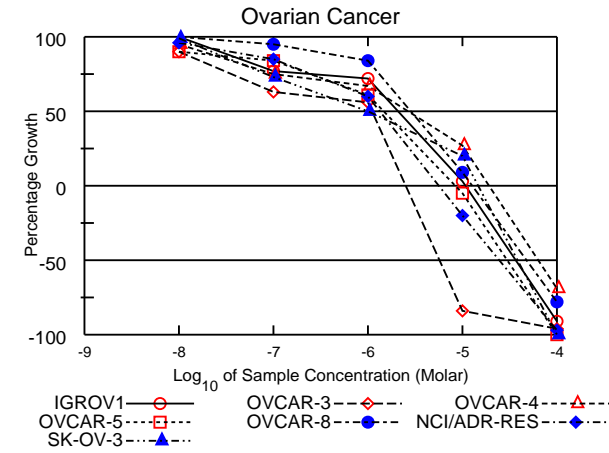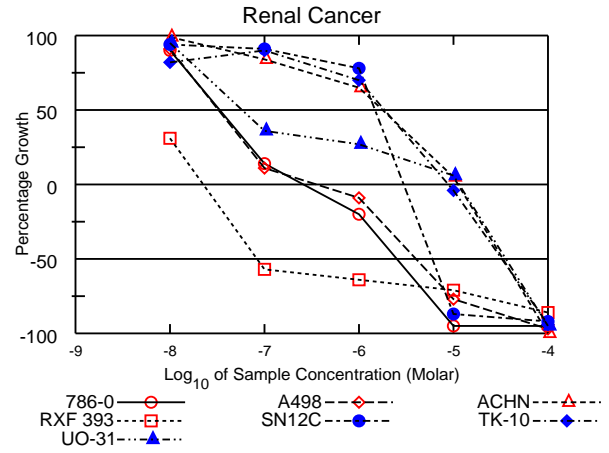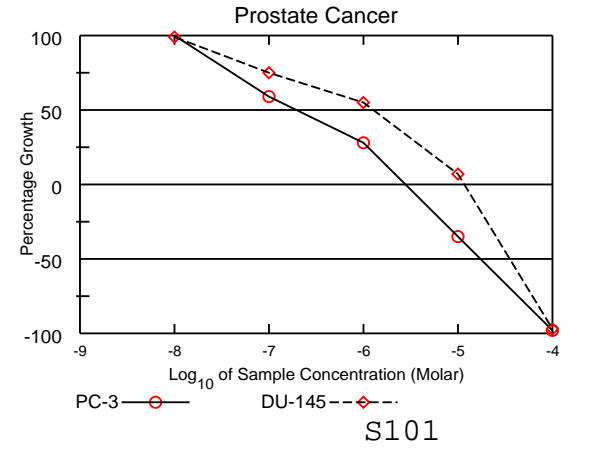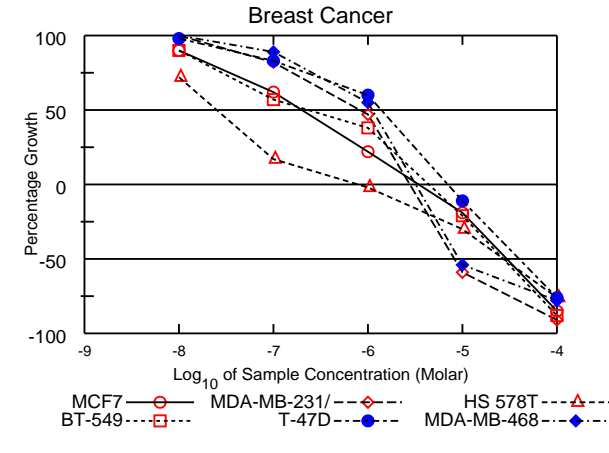

| National Cancer Institute Developmental Therapeutics Program |                        | NSC : D - 746839/1         | Units :Molar          | SSPL :0GZS         | EXP. ID :0806RS26      |                          |
|--------------------------------------------------------------|------------------------|----------------------------|-----------------------|--------------------|------------------------|--------------------------|
| Mean Graphs                                                  |                        | Report Date :July 28, 2011 |                       | Compound <b>56</b> |                        | Test Date :June 02, 2008 |
| Panel/Cell Line                                              | Log <sub>10</sub> GI50 | GI50                       | Log <sub>10</sub> TGI | TGI                | Log <sub>10</sub> LC50 | LC50                     |
| <hr/>                                                        |                        |                            |                       |                    |                        |                          |
| Leukemia                                                     |                        |                            |                       |                    |                        |                          |
| CCRF-CEM                                                     | -7.29                  |                            | -6.47                 |                    | -5.23                  |                          |
| HL-60(TB)                                                    | -7.49                  |                            | -5.96                 |                    | -5.09                  |                          |
| K-562                                                        | -6.75                  |                            | -5.73                 |                    | -4.69                  |                          |
| MOLT-4                                                       | -7.56                  |                            | -7.09                 |                    | -6.18                  |                          |
| RPMI-8226                                                    | -7.98                  |                            | -7.41                 |                    | -6.33                  |                          |
| SR                                                           | -7.23                  |                            | -6.11                 |                    | -5.23                  |                          |
| <hr/>                                                        |                        |                            |                       |                    |                        |                          |
| Non-Small Cell Lung Cancer                                   |                        |                            |                       |                    |                        |                          |
| A549/ATCC                                                    | -6.26                  |                            | -4.97                 |                    | -4.39                  |                          |
| EKVX                                                         | -6.43                  |                            | -5.10                 |                    | -4.49                  |                          |
| HOP-62                                                       | -6.32                  |                            | -5.09                 |                    | -4.52                  |                          |
| HOP-92                                                       | -5.90                  |                            | -5.21                 |                    | -4.47                  |                          |
| NCI-H226                                                     | -5.23                  |                            | -4.67                 |                    | -4.26                  |                          |
| NCI-H23                                                      | -5.95                  |                            | -5.46                 |                    | -4.92                  |                          |
| NCI-H322M                                                    | -5.47                  |                            | -4.85                 |                    | -4.43                  |                          |
| NCI-H460                                                     | -6.49                  |                            | -5.52                 |                    | -4.53                  |                          |
| NCI-H522                                                     | -5.72                  |                            | -5.07                 |                    | -4.44                  |                          |
| <hr/>                                                        |                        |                            |                       |                    |                        |                          |
| Colon Cancer                                                 |                        |                            |                       |                    |                        |                          |
| COLO 205                                                     | -6.36                  |                            | -5.78                 |                    | -5.39                  |                          |
| HCC-2998                                                     | -6.07                  |                            | -5.53                 |                    | -5.03                  |                          |
| HCT-116                                                      | -6.29                  |                            | -5.68                 |                    | -5.27                  |                          |
| HCT-15                                                       | -6.27                  |                            | -5.62                 |                    | -5.16                  |                          |
| HT29                                                         | -5.91                  |                            | -5.31                 |                    | -4.56                  |                          |
| KM12                                                         | -6.08                  |                            | -5.67                 |                    | -5.32                  |                          |
| SW-620                                                       | -6.72                  |                            | -5.92                 |                    | -5.46                  |                          |
| <hr/>                                                        |                        |                            |                       |                    |                        |                          |
| CNS Cancer                                                   |                        |                            |                       |                    |                        |                          |
| SF-268                                                       | -5.92                  |                            | -5.45                 |                    | -4.95                  |                          |
| SF-295                                                       | -7.68                  |                            | -7.06                 |                    | -6.16                  |                          |
| SF-539                                                       | -7.28                  |                            | -5.81                 |                    | -5.28                  |                          |
| SNB-19                                                       | -5.54                  |                            | -4.75                 |                    | -4.37                  |                          |
| SNB-75                                                       | -7.63                  |                            | -6.28                 |                    | -4.72                  |                          |
| U251                                                         | -7.17                  |                            | -5.58                 |                    | -4.97                  |                          |
| <hr/>                                                        |                        |                            |                       |                    |                        |                          |
| Melanoma                                                     |                        |                            |                       |                    |                        |                          |
| LOX IMVI                                                     | -6.28                  |                            | -5.72                 |                    | -5.35                  |                          |
| MALME-3M                                                     | -6.06                  |                            | -5.49                 |                    | -4.94                  |                          |
| M14                                                          | -6.35                  |                            | -5.46                 |                    | -4.73                  |                          |
| MDA-MB-435                                                   | -6.10                  |                            | -5.58                 |                    | -5.13                  |                          |
| SK-MEL-2                                                     | -5.97                  |                            | -5.37                 |                    | -4.64                  |                          |
| SK-MEL-28                                                    | -6.41                  |                            | -5.58                 |                    | -5.10                  |                          |
| SK-MEL-5                                                     | -6.39                  |                            | -5.77                 |                    | -5.35                  |                          |
| UACC-257                                                     | -5.20                  |                            | -4.67                 |                    | -4.30                  |                          |
| UACC-62                                                      | -6.75                  |                            | -6.11                 |                    | -5.24                  |                          |
| <hr/>                                                        |                        |                            |                       |                    |                        |                          |
| Ovarian Cancer                                               |                        |                            |                       |                    |                        |                          |
| IGROV1                                                       | -5.68                  |                            | -4.96                 |                    | -4.43                  |                          |
| OVCAR-3                                                      | -5.96                  |                            | -5.60                 |                    | -5.24                  |                          |
| OVCAR-4                                                      | -5.58                  |                            | -4.72                 |                    | -4.20                  |                          |
| OVCAR-5                                                      | -5.84                  |                            | -5.08                 |                    | -4.53                  |                          |
| OVCAR-8                                                      | -5.55                  |                            | -4.90                 |                    | -4.32                  |                          |
| NCI/ADR-RES                                                  | -5.87                  |                            | -5.25                 |                    | -4.61                  |                          |
| SK-OV-3                                                      | -6.02                  |                            | -4.83                 |                    | -4.42                  |                          |
| <hr/>                                                        |                        |                            |                       |                    |                        |                          |
| Renal Cancer                                                 |                        |                            |                       |                    |                        |                          |
| 786-0                                                        | -7.47                  |                            | -6.60                 |                    | -5.60                  |                          |
| A498                                                         | -7.49                  |                            | -6.45                 |                    | -5.39                  |                          |
| ACHN                                                         | -5.75                  |                            | -4.96                 |                    | -4.48                  |                          |
| RXF 393                                                      | -8.00                  |                            | -7.65                 |                    | -7.08                  |                          |
| SN12C                                                        | -5.83                  |                            | -5.53                 |                    | -5.22                  |                          |
| TK-10                                                        | -5.73                  |                            | -5.05                 |                    | -4.49                  |                          |
| UO-31                                                        | -7.24                  |                            | -4.94                 |                    | -4.44                  |                          |
| <hr/>                                                        |                        |                            |                       |                    |                        |                          |
| Prostate Cancer                                              |                        |                            |                       |                    |                        |                          |
| PC-3                                                         | -6.71                  |                            | -5.55                 |                    | -4.76                  |                          |
| DU-145                                                       | -5.90                  |                            | -4.93                 |                    | -4.45                  |                          |
| <hr/>                                                        |                        |                            |                       |                    |                        |                          |
| Breast Cancer                                                |                        |                            |                       |                    |                        |                          |
| MCF7                                                         | -6.71                  |                            | -5.46                 |                    | -4.53                  |                          |
| MDA-MB-231/ATCC                                              | -6.10                  |                            | -5.56                 |                    | -5.09                  |                          |
| HS 578T                                                      | -7.60                  |                            | -6.11                 |                    | -4.57                  |                          |
| BT-549                                                       | -6.62                  |                            | -5.36                 |                    | -4.57                  |                          |
| T-47D                                                        | -5.85                  |                            | -5.15                 |                    | -4.40                  |                          |
| MDA-MB-468                                                   | -5.96                  |                            | -5.50                 |                    | -5.04                  |                          |
| <hr/>                                                        |                        |                            |                       |                    |                        |                          |
| <hr/>                                                        |                        |                            |                       |                    |                        |                          |
| MID                                                          | -6.41                  |                            | -5.58                 |                    | -4.92                  |                          |
| Delta                                                        | 1.59                   |                            | 2.07                  |                    | 2.16                   |                          |
| Range                                                        | 2.8                    |                            | 2.98                  |                    | 2.88                   |                          |

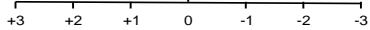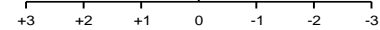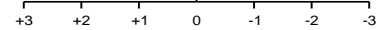

S102

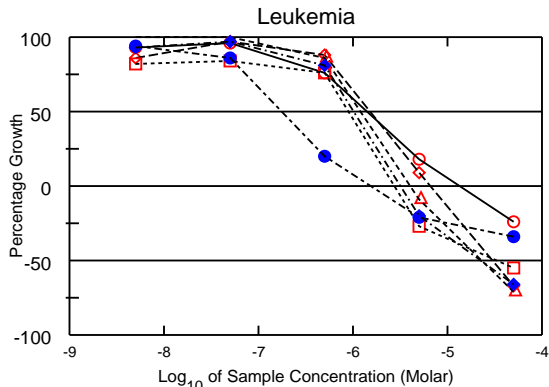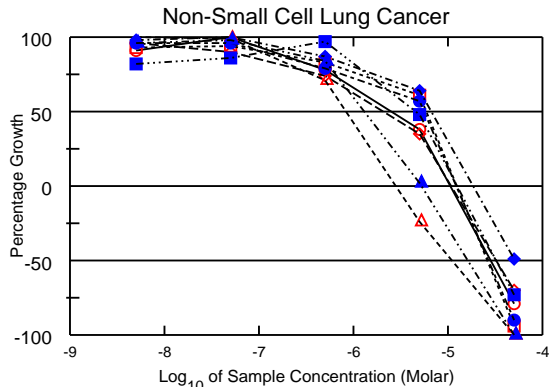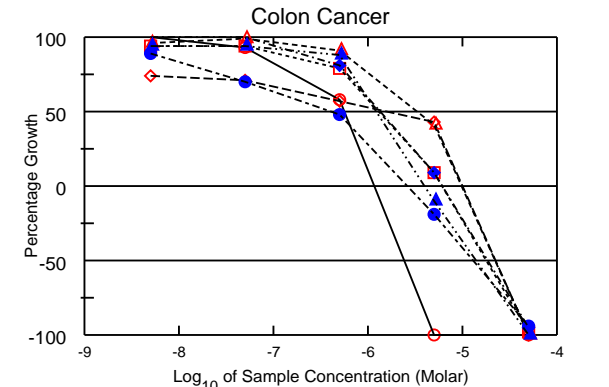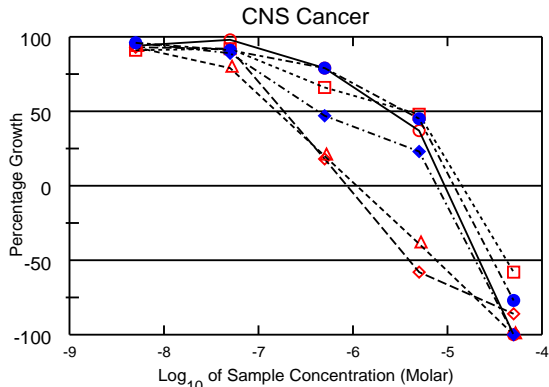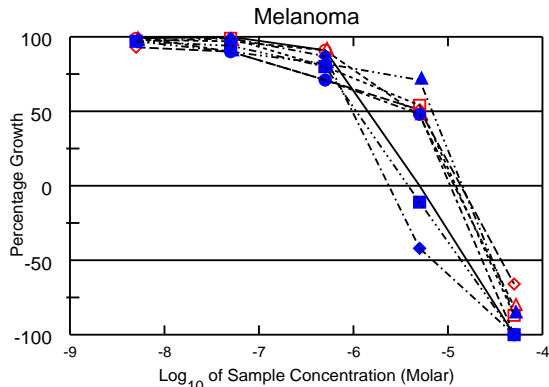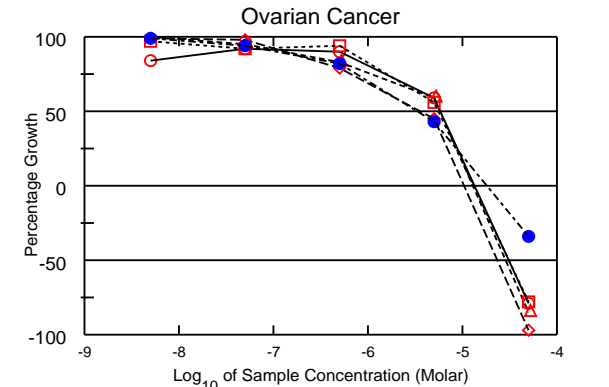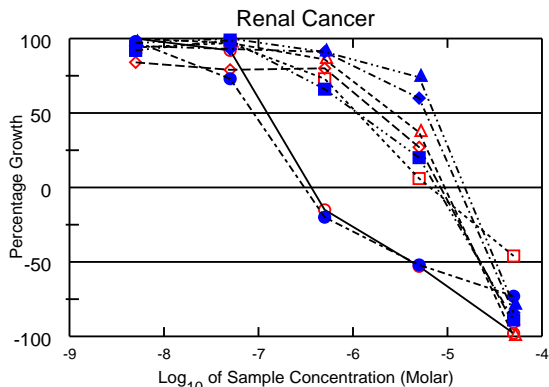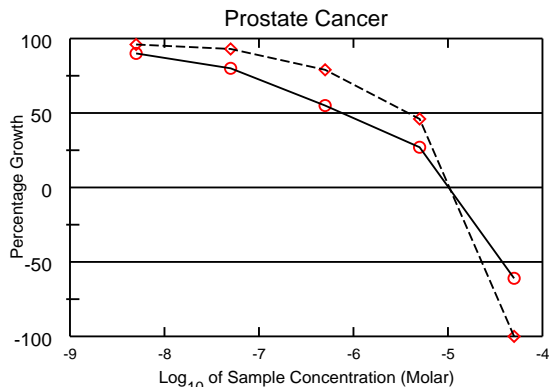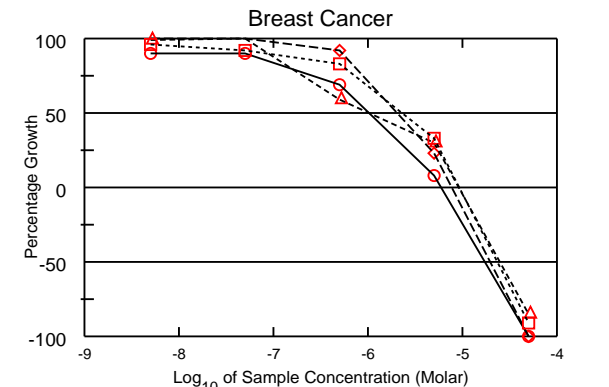

| National Cancer Institute Developmental Therapeutics Program |                        | NSC : D - 749943/1         |                       | Units :Molar |                        | SSPL :0GZS              |  | EXP. ID :0905NS16 |  |
|--------------------------------------------------------------|------------------------|----------------------------|-----------------------|--------------|------------------------|-------------------------|--|-------------------|--|
| Mean Graphs                                                  |                        | Report Date :July 28, 2011 |                       | Compound 57  |                        | Test Date :May 11, 2009 |  |                   |  |
| Panel/Cell Line                                              | Log <sub>10</sub> GI50 | GI50                       | Log <sub>10</sub> TGI | TGI          | Log <sub>10</sub> LC50 | LC50                    |  |                   |  |
| Leukemia                                                     |                        |                            |                       |              |                        |                         |  |                   |  |
| CCRF-CEM                                                     | -5.85                  |                            | -4.86                 |              | >                      | -4.30                   |  |                   |  |
| HL-60(TB)                                                    | -5.82                  |                            | -5.18                 |              |                        | -4.52                   |  |                   |  |
| K-562                                                        | -5.92                  |                            | -5.39                 |              |                        | -4.64                   |  |                   |  |
| MOLT-4                                                       | -6.05                  |                            | -5.56                 |              |                        | -4.48                   |  |                   |  |
| RPMI-8226                                                    | -6.75                  |                            | -5.81                 |              |                        | -4.30                   |  |                   |  |
| SR                                                           | -5.99                  |                            | -5.50                 |              | >                      | -4.65                   |  |                   |  |
| Non-Small Cell Lung Cancer                                   |                        |                            |                       |              |                        |                         |  |                   |  |
| A549/ATCC                                                    | -5.61                  |                            | -4.98                 |              |                        | -4.55                   |  |                   |  |
| EKVX                                                         | -5.68                  |                            | -4.97                 |              |                        | -4.49                   |  |                   |  |
| HOP-62                                                       | -6.08                  |                            | -5.55                 |              |                        | -4.96                   |  |                   |  |
| NCI-H226                                                     | -5.23                  |                            | -4.91                 |              |                        | -4.59                   |  |                   |  |
| NCI-H23                                                      | -5.25                  |                            | -4.91                 |              |                        | -4.57                   |  |                   |  |
| NCI-H322M                                                    | -5.17                  |                            | -4.73                 |              | >                      | -4.30                   |  |                   |  |
| NCI-H460                                                     | -5.88                  |                            | -5.28                 |              |                        | -4.79                   |  |                   |  |
| NCI-H522                                                     | -5.35                  |                            | -4.91                 |              |                        | -4.49                   |  |                   |  |
| Colon Cancer                                                 |                        |                            |                       |              |                        |                         |  |                   |  |
| COLO 205                                                     | -6.25                  |                            | -5.93                 |              |                        | -5.62                   |  |                   |  |
| HCC-2998                                                     | -5.77                  |                            | -5.00                 |              |                        | -4.65                   |  |                   |  |
| HCT-116                                                      | -5.49                  |                            | -5.01                 |              |                        | -4.66                   |  |                   |  |
| HCT-15                                                       | -5.89                  |                            | -5.22                 |              |                        | -4.75                   |  |                   |  |
| HT29                                                         | -6.40                  |                            | -5.58                 |              |                        | -4.88                   |  |                   |  |
| KM12                                                         | -5.87                  |                            | -5.22                 |              |                        | -4.73                   |  |                   |  |
| SW-620                                                       | -5.91                  |                            | -5.40                 |              |                        | -4.85                   |  |                   |  |
| CNS Cancer                                                   |                        |                            |                       |              |                        |                         |  |                   |  |
| SF-268                                                       | -5.61                  |                            | -5.03                 |              |                        | -4.67                   |  |                   |  |
| SF-295                                                       | -6.73                  |                            | -6.06                 |              |                        | -5.41                   |  |                   |  |
| SF-539                                                       | -6.81                  |                            | -5.96                 |              |                        | -5.12                   |  |                   |  |
| SNB-19                                                       | -5.41                  |                            | -4.85                 |              |                        | -4.38                   |  |                   |  |
| SNB-75                                                       | -5.44                  |                            | -4.93                 |              |                        | -4.52                   |  |                   |  |
| U251                                                         | -6.38                  |                            | -5.11                 |              |                        | -4.71                   |  |                   |  |
| Melanoma                                                     |                        |                            |                       |              |                        |                         |  |                   |  |
| LOX IMVI                                                     | -5.85                  |                            | -5.30                 |              |                        | -4.80                   |  |                   |  |
| MALME-3M                                                     | -5.29                  |                            | -4.87                 |              |                        | -4.44                   |  |                   |  |
| MDA-MB-435                                                   | -5.37                  |                            | -4.93                 |              |                        | -4.54                   |  |                   |  |
| SK-MEL-2                                                     | -5.27                  |                            | -4.92                 |              |                        | -4.56                   |  |                   |  |
| SK-MEL-28                                                    | -5.37                  |                            | -4.97                 |              |                        | -4.64                   |  |                   |  |
| SK-MEL-5                                                     | -6.02                  |                            | -5.63                 |              |                        | -5.16                   |  |                   |  |
| UACC-257                                                     | -5.17                  |                            | -4.85                 |              |                        | -4.53                   |  |                   |  |
| UACC-62                                                      | -5.97                  |                            | -5.42                 |              |                        | -4.86                   |  |                   |  |
| Ovarian Cancer                                               |                        |                            |                       |              |                        |                         |  |                   |  |
| IGROV1                                                       | -5.24                  |                            | -4.87                 |              |                        | -4.51                   |  |                   |  |
| OVCAR-3                                                      | -5.44                  |                            | -4.98                 |              |                        | -4.63                   |  |                   |  |
| OVCAR-4                                                      | -5.24                  |                            | -4.89                 |              |                        | -4.54                   |  |                   |  |
| OVCAR-8                                                      | -5.26                  |                            | -4.88                 |              |                        | -4.51                   |  |                   |  |
| SK-OV-3                                                      | -5.49                  |                            | -4.74                 |              | >                      | -4.30                   |  |                   |  |
| Renal Cancer                                                 |                        |                            |                       |              |                        |                         |  |                   |  |
| 786-0                                                        | -6.91                  |                            | -6.44                 |              |                        | -5.38                   |  |                   |  |
| A498                                                         | -5.74                  |                            | -5.08                 |              |                        | -4.66                   |  |                   |  |
| ACHN                                                         | -5.56                  |                            | -5.03                 |              |                        | -4.67                   |  |                   |  |
| CAKI-1                                                       | -5.95                  |                            | -5.18                 |              |                        | -4.67                   |  |                   |  |
| RXF 393                                                      | -7.05                  |                            | -6.52                 |              | >                      | -4.30                   |  |                   |  |
| SN12C                                                        | -5.23                  |                            | -4.88                 |              |                        | -4.54                   |  |                   |  |
| TK-10                                                        | -5.15                  |                            | -4.82                 |              |                        | -4.49                   |  |                   |  |
| UO-31                                                        | -5.95                  |                            | -5.12                 |              |                        | -4.66                   |  |                   |  |
| Prostate Cancer                                              |                        |                            |                       |              |                        |                         |  |                   |  |
| PC-3                                                         | -6.13                  |                            | -5.00                 |              |                        | -4.43                   |  |                   |  |
| DU-145                                                       | -5.42                  |                            | -4.99                 |              |                        | -4.64                   |  |                   |  |
| Breast Cancer                                                |                        |                            |                       |              |                        |                         |  |                   |  |
| MCF7                                                         | -5.99                  |                            | -5.23                 |              |                        | -4.76                   |  |                   |  |
| MDA-MB-231/ATCC                                              | -5.69                  |                            | -5.11                 |              |                        | -4.71                   |  |                   |  |
| BT-549                                                       | -5.98                  |                            | -5.04                 |              |                        | -4.60                   |  |                   |  |
| T-47D                                                        | -5.64                  |                            | -5.04                 |              |                        | -4.63                   |  |                   |  |
| MID                                                          |                        |                            |                       |              |                        |                         |  |                   |  |
| Delta                                                        | 1.27                   |                            | 1.32                  |              |                        | 0.94                    |  |                   |  |
| Range                                                        | 1.9                    |                            | 1.79                  |              |                        | 1.32                    |  |                   |  |

S104



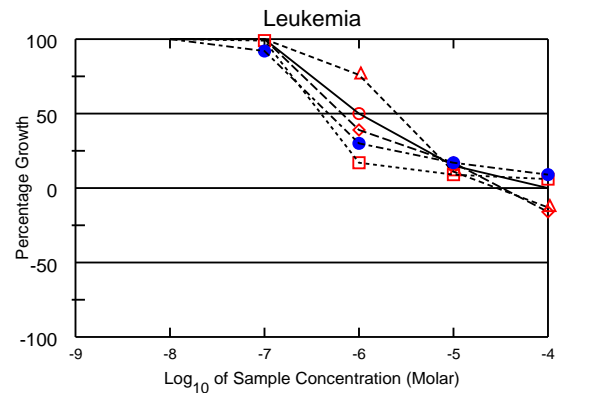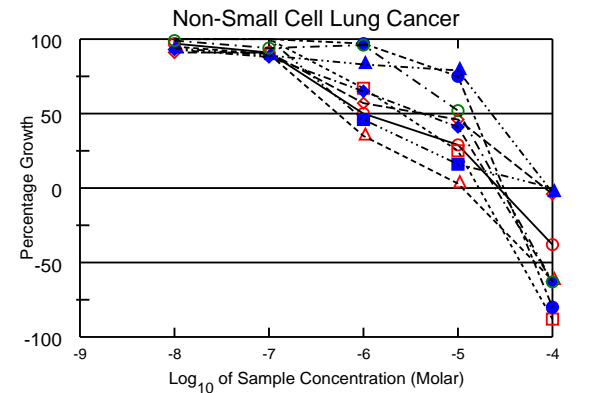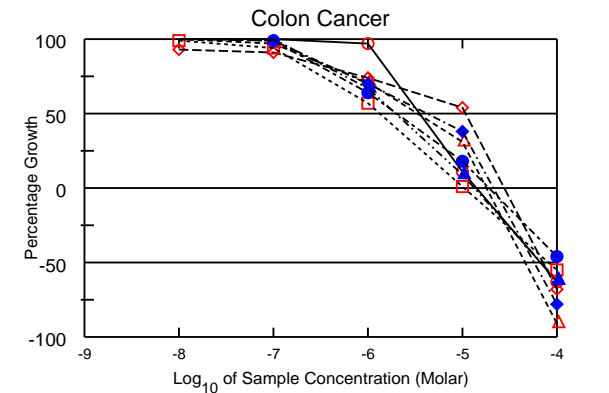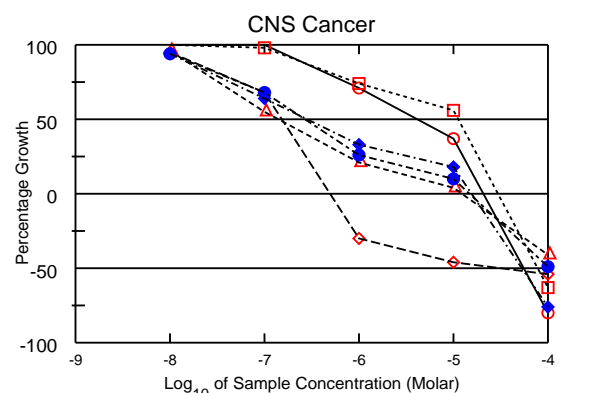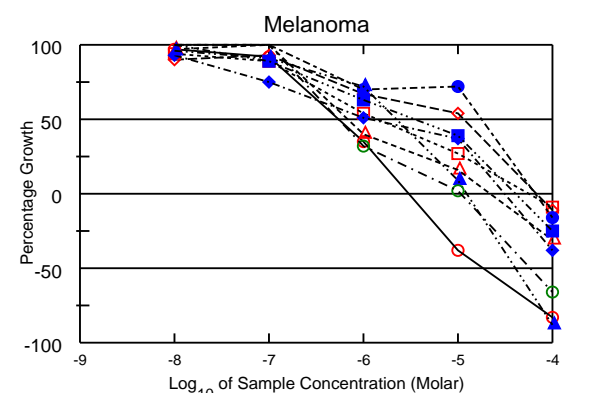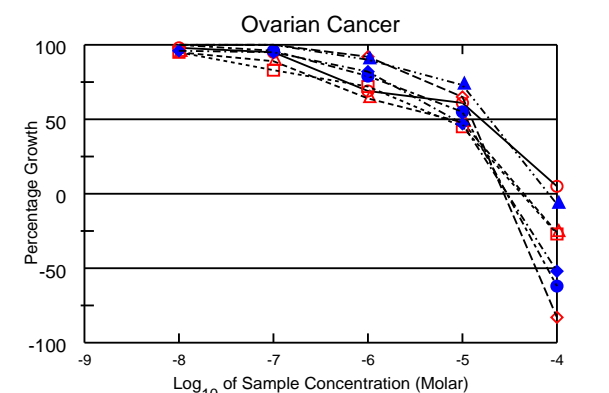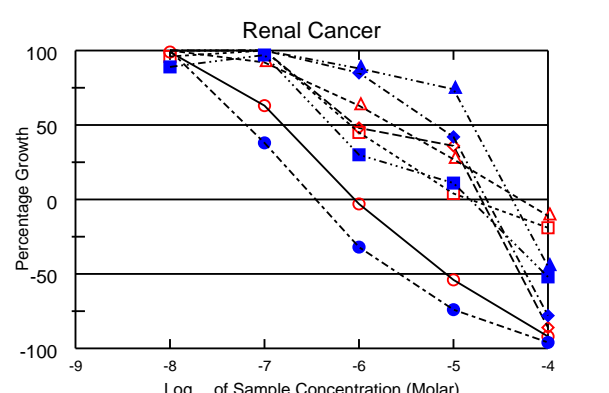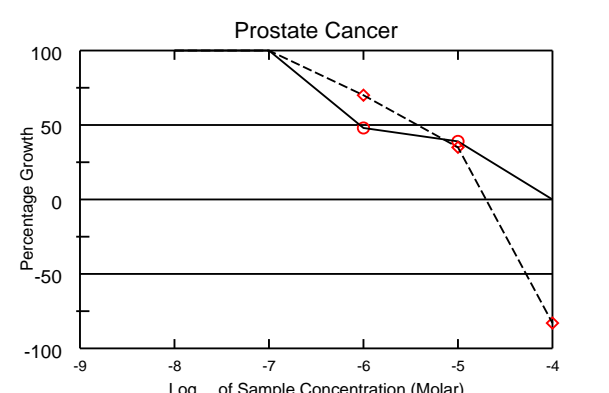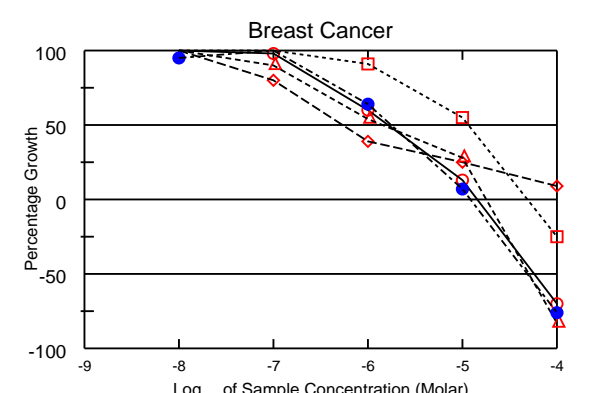

| National Cancer Institute Developmental Therapeutics Program |                        | NSC : D - 758339/1         |                       | Units :Molar |                        | SSPL :0GZS               |  | EXP. ID :1106NS64 |  |
|--------------------------------------------------------------|------------------------|----------------------------|-----------------------|--------------|------------------------|--------------------------|--|-------------------|--|
| Mean Graphs                                                  |                        | Report Date :July 28, 2011 |                       | Compound 58  |                        | Test Date :June 13, 2011 |  |                   |  |
| Panel/Cell Line                                              | Log <sub>10</sub> GI50 | GI50                       | Log <sub>10</sub> TGI | TGI          | Log <sub>10</sub> LC50 | LC50                     |  |                   |  |
| -----                                                        |                        |                            |                       |              |                        |                          |  |                   |  |
| Leukemia                                                     |                        |                            |                       |              |                        |                          |  |                   |  |
| CCRF-CEM                                                     | -5.99                  |                            | > -4.00               |              | > -4.00                |                          |  |                   |  |
| HL-60(TB)                                                    | -6.18                  |                            | -4.47                 |              | >> -4.00               |                          |  |                   |  |
| K-562                                                        | -5.60                  |                            | -4.54                 |              | >>> -4.00              |                          |  |                   |  |
| MOLT-4                                                       | -6.40                  |                            | > -4.00               |              | >>> -4.00              |                          |  |                   |  |
| RPMI-8226                                                    | -6.32                  |                            | > -4.00               |              | >>> -4.00              |                          |  |                   |  |
| -----                                                        |                        |                            |                       |              |                        |                          |  |                   |  |
| Non-Small Cell Lung Cancer                                   |                        |                            |                       |              |                        |                          |  |                   |  |
| A549/ATCC                                                    | -6.01                  |                            | -4.57                 |              | > -4.00                |                          |  |                   |  |
| EKVX                                                         | -5.35                  |                            | -4.08                 |              | > -4.00                |                          |  |                   |  |
| HOP-62                                                       | -6.27                  |                            | -4.96                 |              | >> -4.19               |                          |  |                   |  |
| HOP-92                                                       | -5.59                  |                            | -4.78                 |              | >>> -4.34              |                          |  |                   |  |
| NCI-H226                                                     | -4.84                  |                            | -4.52                 |              | >>> -4.19              |                          |  |                   |  |
| NCI-H23                                                      | -5.38                  |                            | -4.61                 |              | >>> -4.13              |                          |  |                   |  |
| NCI-H322M                                                    | -4.65                  |                            | -4.04                 |              | > -4.00                |                          |  |                   |  |
| NCI-H460                                                     | -6.06                  |                            | > -4.00               |              | > -4.00                |                          |  |                   |  |
| NCI-H522                                                     | -4.98                  |                            | -4.55                 |              | >>> -4.11              |                          |  |                   |  |
| -----                                                        |                        |                            |                       |              |                        |                          |  |                   |  |
| Colon Cancer                                                 |                        |                            |                       |              |                        |                          |  |                   |  |
| COLO 205                                                     | -5.45                  |                            | -4.85                 |              | >>> -4.18              |                          |  |                   |  |
| HCC-2998                                                     | -4.97                  |                            | -4.56                 |              | >>> -4.15              |                          |  |                   |  |
| HCT-116                                                      | -5.46                  |                            | -4.74                 |              | >>> -4.34              |                          |  |                   |  |
| HCT-15                                                       | -5.87                  |                            | -4.99                 |              | >>> -4.09              |                          |  |                   |  |
| HT29                                                         | -5.69                  |                            | -4.72                 |              | > -4.00                |                          |  |                   |  |
| KM12                                                         | -5.37                  |                            | -4.67                 |              | >>> -4.24              |                          |  |                   |  |
| SW-620                                                       | -5.71                  |                            | -4.87                 |              | >>> -4.17              |                          |  |                   |  |
| -----                                                        |                        |                            |                       |              |                        |                          |  |                   |  |
| CNS Cancer                                                   |                        |                            |                       |              |                        |                          |  |                   |  |
| SF-268                                                       | -5.39                  |                            | -4.68                 |              | >>> -4.26              |                          |  |                   |  |
| SF-295                                                       | -6.82                  |                            | -6.30                 |              | >>> -4.47              |                          |  |                   |  |
| SF-539                                                       | -6.85                  |                            | -4.90                 |              | > -4.00                |                          |  |                   |  |
| SNB-19                                                       | -4.95                  |                            | -4.53                 |              | >>> -4.11              |                          |  |                   |  |
| SNB-75                                                       | -6.58                  |                            | -4.83                 |              | > -4.00                |                          |  |                   |  |
| U251                                                         | -6.56                  |                            | -4.81                 |              | >>> -4.27              |                          |  |                   |  |
| -----                                                        |                        |                            |                       |              |                        |                          |  |                   |  |
| Melanoma                                                     |                        |                            |                       |              |                        |                          |  |                   |  |
| LOX IMVI                                                     | -6.26                  |                            | -5.52                 |              | >>> -4.74              |                          |  |                   |  |
| MALME-3M                                                     | -4.93                  |                            | -4.17                 |              | >>> -4.00              |                          |  |                   |  |
| M14                                                          | -6.16                  |                            | -4.66                 |              | >>> -4.00              |                          |  |                   |  |
| MDA-MB-435                                                   | -5.86                  |                            | -4.25                 |              | >>> -4.00              |                          |  |                   |  |
| SK-MEL-2                                                     | -4.75                  |                            | -4.18                 |              | >>> -4.00              |                          |  |                   |  |
| SK-MEL-28                                                    | -5.92                  |                            | -4.51                 |              | >>> -4.00              |                          |  |                   |  |
| SK-MEL-5                                                     | -5.65                  |                            | -4.91                 |              | >>> -4.39              |                          |  |                   |  |
| UACC-257                                                     | -5.46                  |                            | -4.40                 |              | > -4.00                |                          |  |                   |  |
| UACC-62                                                      | -6.26                  |                            | -4.97                 |              | >>> -4.24              |                          |  |                   |  |
| -----                                                        |                        |                            |                       |              |                        |                          |  |                   |  |
| Ovarian Cancer                                               |                        |                            |                       |              |                        |                          |  |                   |  |
| IGROV1                                                       | -4.80                  |                            | > -4.00               |              | > -4.00                |                          |  |                   |  |
| OVCAR-3                                                      | -4.90                  |                            | -4.56                 |              | >>> -4.22              |                          |  |                   |  |
| OVCAR-4                                                      | -5.14                  |                            | -4.35                 |              | > -4.00                |                          |  |                   |  |
| OVCAR-5                                                      | -5.18                  |                            | -4.38                 |              | >>> -4.00              |                          |  |                   |  |
| OVCAR-8                                                      | -4.96                  |                            | -4.53                 |              | >>> -4.11              |                          |  |                   |  |
| NCI/ADR-RES                                                  | -5.09                  |                            | -4.53                 |              | >>> -4.02              |                          |  |                   |  |
| SK-OV-3                                                      | -4.71                  |                            | -4.09                 |              | > -4.00                |                          |  |                   |  |
| -----                                                        |                        |                            |                       |              |                        |                          |  |                   |  |
| Renal Cancer                                                 |                        |                            |                       |              |                        |                          |  |                   |  |
| 786-O                                                        | -6.80                  |                            | -6.04                 |              | >>> -5.08              |                          |  |                   |  |
| A498                                                         | -6.03                  |                            | -4.71                 |              | >>> -4.30              |                          |  |                   |  |
| ACHN                                                         | -5.65                  |                            | -4.30                 |              | >>> -4.00              |                          |  |                   |  |
| CAKI-1                                                       | -6.09                  |                            | -4.82                 |              | >>> -4.00              |                          |  |                   |  |
| RXF 393                                                      | -7.18                  |                            | -6.45                 |              | >>> -5.57              |                          |  |                   |  |
| SN12C                                                        | -5.18                  |                            | -4.65                 |              | >>> -4.23              |                          |  |                   |  |
| TK-10                                                        | -4.80                  |                            | -4.38                 |              | > -4.00                |                          |  |                   |  |
| UO-31                                                        | -6.30                  |                            | -4.82                 |              | >>> -4.03              |                          |  |                   |  |
| -----                                                        |                        |                            |                       |              |                        |                          |  |                   |  |
| Prostate Cancer                                              |                        |                            |                       |              |                        |                          |  |                   |  |
| PC-3                                                         | -6.04                  |                            | > -4.00               |              | > -4.00                |                          |  |                   |  |
| DU-145                                                       | -5.42                  |                            | -4.70                 |              | >>> -4.28              |                          |  |                   |  |
| -----                                                        |                        |                            |                       |              |                        |                          |  |                   |  |
| Breast Cancer                                                |                        |                            |                       |              |                        |                          |  |                   |  |
| MDA-MB-231/ATCC                                              | -5.79                  |                            | -4.84                 |              | >>> -4.24              |                          |  |                   |  |
| HS 578T                                                      | -6.26                  |                            | > -4.00               |              | > -4.00                |                          |  |                   |  |
| BT-549                                                       | -5.86                  |                            | -4.75                 |              | >>> -4.30              |                          |  |                   |  |
| T-47D                                                        | -4.94                  |                            | -4.31                 |              | > -4.00                |                          |  |                   |  |
| MDA-MB-468                                                   | -5.75                  |                            | -4.91                 |              | >>> -4.31              |                          |  |                   |  |
| -----                                                        |                        |                            |                       |              |                        |                          |  |                   |  |
| MID                                                          |                        |                            |                       |              |                        |                          |  |                   |  |
| Delta                                                        | -5.68                  |                            | -4.62                 |              | -4.16                  |                          |  |                   |  |
| Range                                                        | 1.5                    |                            | 1.83                  |              | 1.41                   |                          |  |                   |  |
|                                                              | 2.53                   |                            | 2.45                  |              | 1.57                   |                          |  |                   |  |

S106

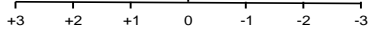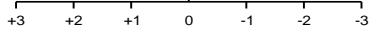

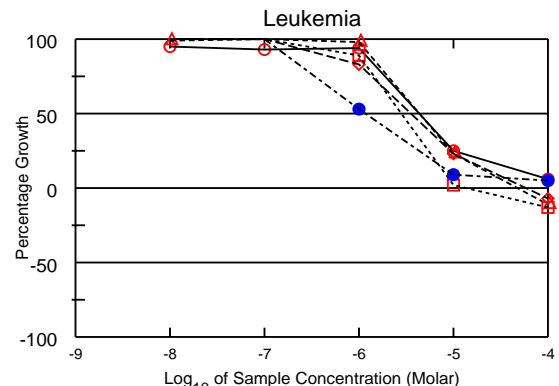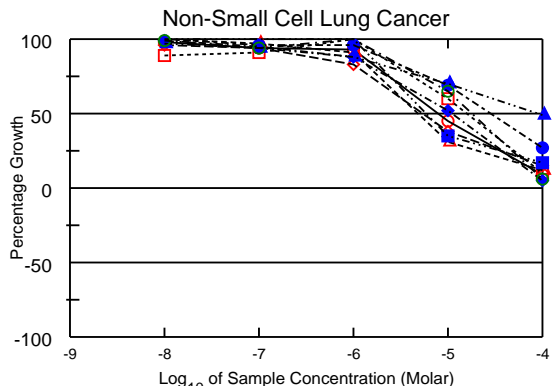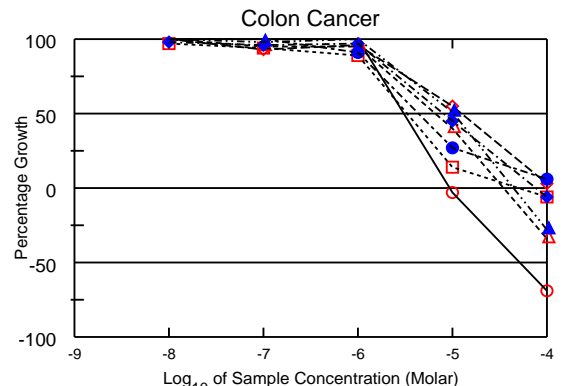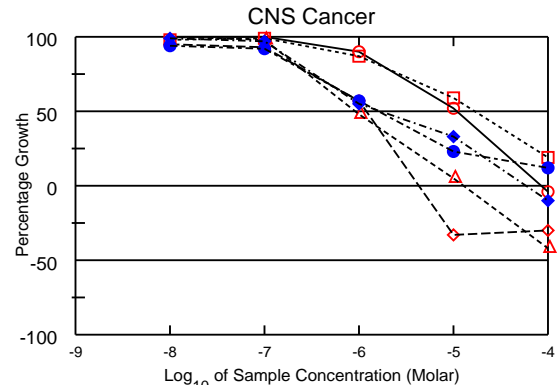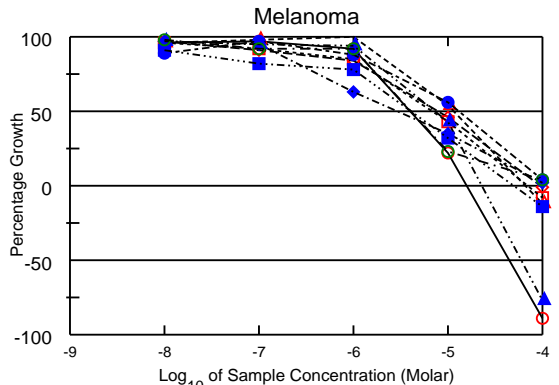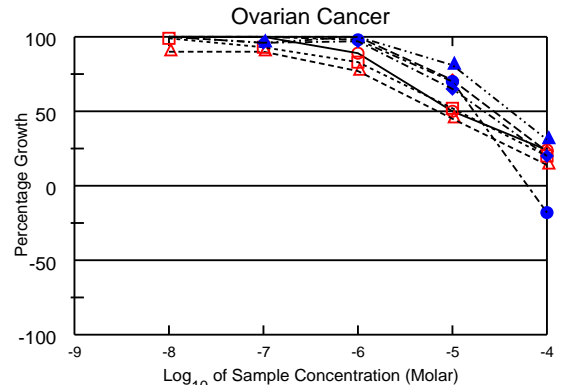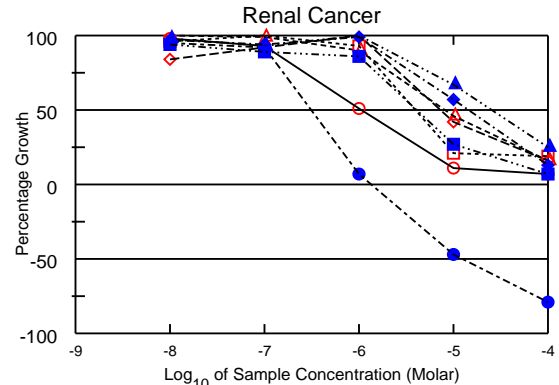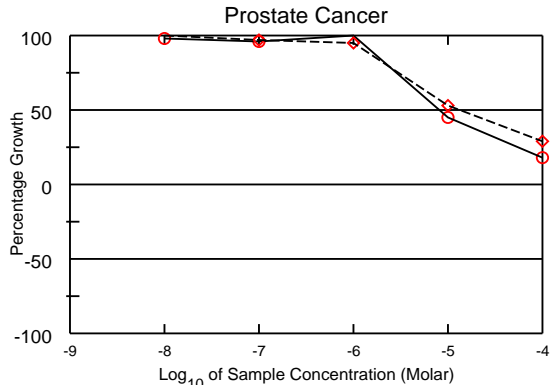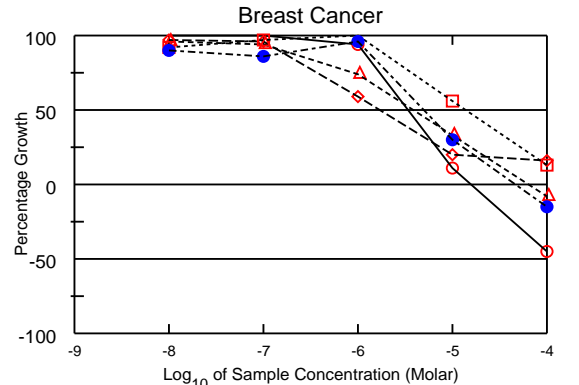

| National Cancer Institute Developmental Therapeutics Program |                        | NSC : D - 758340/1         |                       | Units :Molar       |                        | SSPL :0GZS               |  | EXP. ID :1106NS64 |  |
|--------------------------------------------------------------|------------------------|----------------------------|-----------------------|--------------------|------------------------|--------------------------|--|-------------------|--|
| Mean Graphs                                                  |                        | Report Date :July 28, 2011 |                       | Compound <b>60</b> |                        | Test Date :June 13, 2011 |  |                   |  |
| Panel/Cell Line                                              | Log <sub>10</sub> GI50 | GI50                       | Log <sub>10</sub> TGI | TGI                | Log <sub>10</sub> LC50 | LC50                     |  |                   |  |
| Leukemia                                                     |                        |                            |                       |                    |                        |                          |  |                   |  |
| CCRF-CEM                                                     | -5.36                  |                            | > -4.00               |                    | > -4.00                |                          |  |                   |  |
| HL-60(TB)                                                    | -5.45                  |                            | > -4.22               |                    | > -4.00                |                          |  |                   |  |
| K-562                                                        | -5.36                  |                            | > -4.32               |                    | > -4.00                |                          |  |                   |  |
| MOLT-4                                                       | -5.55                  |                            | > -4.88               |                    | > -4.00                |                          |  |                   |  |
| RPMI-8226                                                    | -5.93                  |                            | > -4.00               |                    | > -4.00                |                          |  |                   |  |
| Non-Small Cell Lung Cancer                                   |                        |                            |                       |                    |                        |                          |  |                   |  |
| A549/ATCC                                                    | -5.11                  |                            | > -4.00               |                    | > -4.00                |                          |  |                   |  |
| EKVX                                                         | -5.26                  |                            | > -4.00               |                    | > -4.00                |                          |  |                   |  |
| HOP-62                                                       | -5.31                  |                            | > -4.00               |                    | > -4.00                |                          |  |                   |  |
| HOP-92                                                       | -4.80                  |                            | > -4.00               |                    | > -4.00                |                          |  |                   |  |
| NCI-H226                                                     | -4.55                  |                            | > -4.00               |                    | > -4.00                |                          |  |                   |  |
| NCI-H23                                                      | -4.96                  |                            | > -4.00               |                    | > -4.00                |                          |  |                   |  |
| NCI-H322M                                                    | -4.05                  |                            | > -4.00               |                    | > -4.00                |                          |  |                   |  |
| NCI-H460                                                     | -5.23                  |                            | > -4.00               |                    | > -4.00                |                          |  |                   |  |
| NCI-H522                                                     | -4.74                  |                            | > -4.00               |                    | > -4.00                |                          |  |                   |  |
| Colon Cancer                                                 |                        |                            |                       |                    |                        |                          |  |                   |  |
| COLO 205                                                     | -5.46                  |                            | > -5.03               |                    | > -4.29                |                          |  |                   |  |
| HCC-2998                                                     | -4.91                  |                            | > -4.00               |                    | > -4.00                |                          |  |                   |  |
| HCT-116                                                      | -5.18                  |                            | > -4.45               |                    | > -4.00                |                          |  |                   |  |
| HCT-15                                                       | -5.48                  |                            | > -4.29               |                    | > -4.00                |                          |  |                   |  |
| HT29                                                         | -5.36                  |                            | > -4.00               |                    | > -4.00                |                          |  |                   |  |
| KM12                                                         | -5.10                  |                            | > -4.12               |                    | > -4.00                |                          |  |                   |  |
| SW-620                                                       | -4.99                  |                            | > -4.35               |                    | > -4.00                |                          |  |                   |  |
| CNS Cancer                                                   |                        |                            |                       |                    |                        |                          |  |                   |  |
| SF-268                                                       | -4.96                  |                            | > -4.07               |                    | > -4.00                |                          |  |                   |  |
| SF-295                                                       | -5.92                  |                            | > -5.36               |                    | > -4.00                |                          |  |                   |  |
| SF-539                                                       | -6.05                  |                            | > -4.89               |                    | > -4.00                |                          |  |                   |  |
| SNB-19                                                       | -4.78                  |                            | > -4.00               |                    | > -4.00                |                          |  |                   |  |
| SNB-75                                                       | -5.79                  |                            | > -4.00               |                    | > -4.00                |                          |  |                   |  |
| U251                                                         | -5.76                  |                            | > -4.22               |                    | > -4.00                |                          |  |                   |  |
| Melanoma                                                     |                        |                            |                       |                    |                        |                          |  |                   |  |
| LOX IMVI                                                     | -5.40                  |                            | > -4.80               |                    | > -4.35                |                          |  |                   |  |
| MALME-3M                                                     | -5.10                  |                            | > -4.02               |                    | > -4.00                |                          |  |                   |  |
| M14                                                          | -4.95                  |                            | > -4.19               |                    | > -4.00                |                          |  |                   |  |
| MDA-MB-435                                                   | -5.17                  |                            | > -4.16               |                    | > -4.00                |                          |  |                   |  |
| SK-MEL-2                                                     | -4.89                  |                            | > -4.00               |                    | > -4.00                |                          |  |                   |  |
| SK-MEL-28                                                    | -5.53                  |                            | > -4.00               |                    | > -4.00                |                          |  |                   |  |
| SK-MEL-5                                                     | -5.14                  |                            | > -4.64               |                    | > -4.23                |                          |  |                   |  |
| UACC-257                                                     | -5.40                  |                            | > -4.31               |                    | > -4.00                |                          |  |                   |  |
| UACC-62                                                      | -5.39                  |                            | > -4.00               |                    | > -4.00                |                          |  |                   |  |
| Ovarian Cancer                                               |                        |                            |                       |                    |                        |                          |  |                   |  |
| IGROV1                                                       | -5.01                  |                            | > -4.00               |                    | > -4.00                |                          |  |                   |  |
| OVCAR-3                                                      | -4.56                  |                            | > -4.00               |                    | > -4.00                |                          |  |                   |  |
| OVCAR-4                                                      | -5.16                  |                            | > -4.00               |                    | > -4.00                |                          |  |                   |  |
| OVCAR-5                                                      | -4.93                  |                            | > -4.00               |                    | > -4.00                |                          |  |                   |  |
| OVCAR-8                                                      | -4.77                  |                            | > -4.21               |                    | > -4.00                |                          |  |                   |  |
| NCI/ADR-RES                                                  | -4.67                  |                            | > -4.00               |                    | > -4.00                |                          |  |                   |  |
| Sk-OV-3                                                      | -4.38                  |                            | > -4.00               |                    | > -4.00                |                          |  |                   |  |
| Renal Cancer                                                 |                        |                            |                       |                    |                        |                          |  |                   |  |
| 786-O                                                        | -5.99                  |                            | > -4.00               |                    | > -4.00                |                          |  |                   |  |
| A498                                                         | -5.12                  |                            | > -4.00               |                    | > -4.00                |                          |  |                   |  |
| ACHN                                                         | -5.10                  |                            | > -4.00               |                    | > -4.00                |                          |  |                   |  |
| CAKI-1                                                       | -5.40                  |                            | > -4.00               |                    | > -4.00                |                          |  |                   |  |
| RXF 393                                                      | -6.51                  |                            | > -5.88               |                    | > -4.91                |                          |  |                   |  |
| SN12C                                                        | -4.83                  |                            | > -4.00               |                    | > -4.00                |                          |  |                   |  |
| TK-10                                                        | -4.60                  |                            | > -4.00               |                    | > -4.00                |                          |  |                   |  |
| UO-31                                                        | -5.39                  |                            | > -4.00               |                    | > -4.00                |                          |  |                   |  |
| Prostate Cancer                                              |                        |                            |                       |                    |                        |                          |  |                   |  |
| PC-3                                                         | -5.09                  |                            | > -4.00               |                    | > -4.00                |                          |  |                   |  |
| DU-145                                                       | -4.87                  |                            | > -4.00               |                    | > -4.00                |                          |  |                   |  |
| Breast Cancer                                                |                        |                            |                       |                    |                        |                          |  |                   |  |
| MDA-MB-231/ATCC                                              | -5.47                  |                            | > -4.80               |                    | > -4.00                |                          |  |                   |  |
| HS 578T                                                      | -5.76                  |                            | > -4.00               |                    | > -4.00                |                          |  |                   |  |
| BT-549                                                       | -5.41                  |                            | > -4.20               |                    | > -4.00                |                          |  |                   |  |
| T-47D                                                        | -4.87                  |                            | > -4.00               |                    | > -4.00                |                          |  |                   |  |
| MDA-MB-468                                                   | -5.31                  |                            | > -4.33               |                    | > -4.00                |                          |  |                   |  |
| MID                                                          |                        |                            |                       |                    |                        |                          |  |                   |  |
| Delta                                                        | -5.2                   |                            | -4.2                  | S108               | -4.03                  |                          |  |                   |  |
| Range                                                        | 1.31                   |                            | 1.68                  |                    | 0.88                   |                          |  |                   |  |
|                                                              | 2.46                   |                            | 1.88                  |                    | 0.91                   |                          |  |                   |  |
